# Supplementary material
Source: PubMed Central journal article supplement (PMC5308454)
Supplement: NIHMS824674-supplement-ESI1.pdf [file NIHMS824674-supplement-ESI1.pdf]

# Synthesis and Biological Evaluation of Benzocyclooctene-based and Indene-based Anticancer Agents that Function as Inhibitors of Tubulin Polymerization

Christine A. Herdman<sup>a</sup>, Tracy E. Strecker<sup>a</sup>, Rajendra P. Tanpure<sup>a</sup>, Zhi Chen<sup>a</sup>, Alex Winters<sup>b</sup>, Jeni Gerberich<sup>b</sup>, Li Liu<sup>b</sup>, Ernest Hamel<sup>c</sup>, Ralph P. Mason<sup>b</sup>, David J. Chaplin<sup>a,d</sup>, Mary Lynn Trawick<sup>a</sup>, and Kevin G. Pinney<sup>a\*</sup>

<sup>a</sup>Department of Chemistry and Biochemistry, Baylor University, One Bear Place #97348, Waco, Texas 76798-7348, United States

<sup>b</sup> Prognostic Imaging Research Laboratory, Department of Radiology, The University of Texas Southwestern Medical Center, 5323 Harry Hines Boulevard, Dallas, TX 75390-9058, United States

<sup>c</sup>Screening Technologies Branch, Developmental Therapeutics Program, Division of Cancer Treatment and Diagnosis, National Cancer Institute, Frederick National Laboratory for Cancer Research, National Institutes of Health, Frederick, MD 21702, United States

<sup>d</sup>Mateon Therapeutics, Inc., 701 Gateway Boulevard, Suite 210, South San Francisco, California 94080, United States

## Supplemental Data Table of Contents

|                                                                                                     |                  |
|-----------------------------------------------------------------------------------------------------|------------------|
| <b>Synthesis</b>                                                                                    | <b>S3-S22</b>    |
| <b>SRB Assay</b>                                                                                    | <b>S22</b>       |
| <b>Colchicine Binding Assay</b>                                                                     | <b>S22-S23</b>   |
| <b>Inhibition of Tubulin of Polymerization</b>                                                      | <b>S23</b>       |
| <b><i>In vivo</i> BLI</b>                                                                           | <b>S24</b>       |
| <b>Histology</b>                                                                                    | <b>S24-S25</b>   |
| <b><sup>1</sup>H NMR and <sup>13</sup>C NMR of compound 3</b>                                       | <b>S26-S27</b>   |
| <b><sup>1</sup>H NMR of compound 4</b>                                                              | <b>S28</b>       |
| <b><sup>1</sup>H NMR and <sup>13</sup>C NMR of compound 5</b>                                       | <b>S29-S30</b>   |
| <b><sup>1</sup>H NMR and <sup>13</sup>C NMR of compound 6</b>                                       | <b>S31-S32</b>   |
| <b><sup>1</sup>H NMR and <sup>13</sup>C NMR of compound 9</b>                                       | <b>S33-S34</b>   |
| <b><sup>1</sup>H NMR and <sup>13</sup>C NMR of compound 10</b>                                      | <b>S35-S36</b>   |
| <b><sup>1</sup>H NMR and <sup>13</sup>C NMR of compound 11</b>                                      | <b>S37-S38</b>   |
| <b><sup>1</sup>H NMR and <sup>13</sup>C NMR of compound 12</b>                                      | <b>S39-S40</b>   |
| <b><sup>1</sup>H NMR and <sup>13</sup>C NMR of compound 13</b>                                      | <b>S41-S42</b>   |
| <b><sup>1</sup>H NMR and <sup>13</sup>C NMR of compound 14</b>                                      | <b>S43-S44</b>   |
| <b><sup>1</sup>H NMR and <sup>13</sup>C NMR of compound 15</b>                                      | <b>S45-S46</b>   |
| <b><sup>1</sup>H NMR and <sup>13</sup>C NMR of compound 16</b>                                      | <b>S47-S48</b>   |
| <b><sup>1</sup>H NMR, <sup>13</sup>C NMR, HPLC, and HRMS<br/>of compound 20</b>                     | <b>S49-S55</b>   |
| <b>X-ray crystal structure and data<br/>of compound 20</b>                                          | <b>S56-S63</b>   |
| <b><sup>1</sup>H NMR, <sup>13</sup>C NMR, HPLC, and HRMS<br/>of compound 21</b>                     | <b>S64-S70</b>   |
| <b><sup>1</sup>H NMR and <sup>13</sup>C NMR of compound 22</b>                                      | <b>S71-S72</b>   |
| <b><sup>1</sup>H NMR, <sup>13</sup>C NMR, HPLC, and HRMS<br/>of compound 23</b>                     | <b>S73-S79</b>   |
| <b>X-ray crystal structure and data<br/>of compound 23</b>                                          | <b>S80-S88</b>   |
| <b><sup>1</sup>H NMR, <sup>13</sup>C NMR, <sup>31</sup>P NMR, HPLC, and<br/>HRMS of compound 24</b> | <b>S89-S96</b>   |
| <b><sup>1</sup>H NMR, <sup>13</sup>C NMR, HPLC, and HRMS<br/>of compound 28</b>                     | <b>S97-S103</b>  |
| <b><sup>1</sup>H NMR, <sup>13</sup>C NMR, HPLC, and HRMS<br/>of compound 29</b>                     | <b>S104-S109</b> |
| <b><sup>1</sup>H NMR, <sup>13</sup>C NMR, HPLC, and HRMS<br/>of compound 31</b>                     | <b>S110-S117</b> |
| <b><sup>1</sup>H NMR, <sup>13</sup>C NMR, <sup>31</sup>P NMR, HPLC, and HRMS<br/>of compound 32</b> | <b>S118-S127</b> |
| <b>References</b>                                                                                   | <b>S128</b>      |

## 4. Experimental Section

### 4.1 General Materials and Methods

Tetrahydrofuran (THF), CH<sub>2</sub>Cl<sub>2</sub>, ethanol, methanol, dimethylformamide (DMF), and acetonitrile were used in their anhydrous forms. Reactions were performed under nitrogen gas. Thin-layer chromatography (TLC) plates (precoated glass plates with silica gel 60 F254, 0.25 mm thickness) were used to monitor reactions. Purification of intermediates and products was carried out with a Biotage Isolera flash purification system using silica gel (200–400 mesh, 60 Å). Intermediates and products synthesized were characterized on the basis of their <sup>1</sup>H NMR (500 or 600 MHz) and <sup>13</sup>C NMR (125 or 150 MHz) spectroscopic data using a Varian VNMRS 500 MHz or a Bruker Ascend 600 MHz instrument. Spectra were recorded in CDCl<sub>3</sub> and D<sub>2</sub>O. All chemical shifts are expressed in ppm (δ), coupling constants (J) are presented in Hz, and peak patterns are reported as singlet (s), doublet (d), triplet (t), quartet (q), pentet (p), septet (sept), and multiplet (m).

Purity of the target compounds was further analyzed at 25 °C using an Agilent 1200 HPLC system with a diode-array detector (λ = 190–400 nm), a Zorbax XDB-C18 HPLC column (4.6 mm Å~ 150 mm, 5 μm), and a Zorbax reliance cartridge guard-column; method A: solvent A, acetonitrile, solvent B, H<sub>2</sub>O; gradient, 10% A/90% B to 100% A/0% B or method B: solvent A, acetonitrile, solvent B, 0.1% TFA in H<sub>2</sub>O over 0 to 40 min; post-time 10 min; flow rate 1.0 mL/min; injection volume 20 μL; monitored at wavelengths of 210, 254, 230, 280, and 360 nm. Mass spectrometry was carried out under positive ESI (electrospray ionization) using a Thermo Scientific LTQ Orbitrap

Discovery instrument.

**4.1.1. 6-(2',3'-Dimethoxyphenyl)hex-5-enoic acid (1).**<sup>7</sup> To a well-stirred solution of 4-(carboxybutyl)triphenyl phosphonium bromide (13.47 g, 30.39 mmol) dissolved in THF (500 mL) at rt was added potassium *tert*-butoxide (7.43 g, 66.2 mmol). After 1 h, 2,3-dimethoxybenzaldehyde (5.02 g, 30.1 mmol) dissolved in THF (100 mL) was added to the original reaction mixture, and stirring at room temperature was continued. After 12 h, the THF was evaporated under reduced pressure, and the resulting material was quenched with 2 M HCl (100 mL) and extracted with EtOAc (2 x 100 mL). The combined organic layers were evaporated under reduced pressure. Purification by flash column chromatography using a pre-packed 100 g silica column [solvent A: EtOAc; solvent B: hexanes; gradient: 10%A / 90%B (1 CV), 10%A / 90%B → 50%A / 50%B (10 CV), 50%A / 50%B (2 CV); flow rate: 40 mL/min; monitored at 254 and 280 nm] afforded compound **1** (3.61 g, 14.4 mmol, 48%) as a yellow oil. NMR characterization was determined after the next step.

**4.1.2. 6-(2',3'-Dimethoxyphenyl)hexanoic acid (3).**<sup>7</sup> To a well-stirred solution of carboxylic acid **1** (3.61 g, 14.4 mmol) dissolved in MeOH (150 mL) was added 10% Pd on carbon (0.74 g) and H<sub>2</sub> gas (balloon), and the reaction was stirred at room temperature for 12 h. The reaction mixture was then filtered through Celite®, the Celite® was washed with EtOAc (3 x 50 mL), and the filtrate (MeOH and EtOAc) was evaporated under reduced pressure. The organic material was purified by flash chromatography using a pre-packed 100 g silica column [solvent A: EtOAc; solvent B: hexanes; gradient: 7%A / 93%B (1 CV), 7%A / 93%B → 40%A / 60%B (10 CV), 40%A / 60%B (2 CV); flow rate: 40 mL/min; monitored at 254 and 280 nm] to afford carboxylic acid **3** (3.63 g, 14.4

mmol, quantitative) as a colorless oil.  $^1\text{H}$  NMR ( $\text{CDCl}_3$ , 600 MHz)  $\delta$  11.83 (1H, s), 7.01 (1H, t,  $J = 9.5$  Hz), 6.80 (2H,  $J = 10$  Hz), 3.88 (3H, s), 3.86 (3H, s), 2.68 (2H, t,  $J = 9$  Hz), 2.39 (2H, t,  $J = 16$  Hz), 1.70 (4H, m), 1.46 (2H, p,  $J = 9.5$  Hz).  $^{13}\text{C}$  NMR ( $\text{CDCl}_3$ , 150 Hz)  $\delta$  180.1, 152.7, 147.1, 136.2, 123.8, 121.9, 110.2, 60.5, 55.5, 34.0, 30.4, 29.6, 28.9, 24.5.

**4.1.3. 1,2-Dimethoxy-benzocyclooct-5-one (5).**<sup>7</sup> To carboxylic acid **3** (4.40 g, 17.4 mmol) was added Eaton's reagent (35 mL, 3 g per mmol of compound **3**), and the mixture was stirred at room temperature for 12 h, at which time it was poured over ice, which was allowed to melt, and the solution was neutralized with sodium bicarbonate. The organic layer was extracted with EtOAc (3 x 50 mL), dried over sodium sulfate, evaporated under reduced pressure, and purified by flash chromatography using a pre-packed 100 g silica column [solvent A: EtOAc; solvent B: hexanes; gradient: 7%A / 93%B (1 CV), 7%A / 93%B  $\rightarrow$  40%A / 60%B (10 CV), 40%A / 60%B (2 CV); flow rate: 40 mL/min; monitored at 254 and 280 nm] to afford ketone **5** (0.58 g, 2.5 mmol, 14 %) as a yellow oil.  $^1\text{H}$  NMR ( $\text{CDCl}_3$ , 600 MHz)  $\delta$  7.35 (1H, d,  $J = 8.4$  Hz), 6.65 (1H, d,  $J = 9$  Hz), 3.69 (3H, s), 3.59 (3H, s), 2.94 (2H, t,  $J = 6.6$  Hz), 2.73 (2H, t,  $J = 6.6$  Hz), 1.59 (4H, m), 1.27 (2H, p,  $J = 6.6$  Hz).  $^{13}\text{C}$  NMR ( $\text{CDCl}_3$ , 150 Hz)  $\delta$  204.9, 155.5, 146.2, 134.7, 133.5, 124.8, 109.6, 60.7, 55.6, 43.9, 27.0, 25.4, 24.7, 24.1.

**4.1.4. [TMAH][Al<sub>2</sub>Cl<sub>7</sub>].**<sup>70</sup> To dry  $\text{CH}_2\text{Cl}_2$  (150 mL) was added  $\text{AlCl}_3$  (19.84 g, 149.08 mmol), which was stirred and cooled to 0 °C. Trimethylamine hydrochloride (7.11 g, 74.54 mmol) was added, and the mixture was stirred for 2 h at room temperature. The resulting liquid was stored at room temperature under nitrogen.

**4.1.5. 1-Hydroxy-2-methoxy-benzocyclooct-5-one (13).** To ketone **5** (0.57 g, 2.3 mmol) in a 20 mL microwave vial was added [TMAH][Al<sub>2</sub>Cl<sub>7</sub>] (7.54 mL, 4.69 mmol), and the mixture was reacted in a microwave for 1 h at 80 °C. The solution was poured into water (50 mL), extracted with EtOAc (3 x 25 mL), dried over sodium sulfate, and evaporated under reduced pressure. The crude reaction mixture was purified by flash chromatography using a pre-packed 50 g silica column [solvent A: EtOAc; solvent B: hexanes; gradient: 7%A / 93%B (1 CV), 7%A / 93%B → 60%A / 40%B (10 CV), 60%A / 40%B (2 CV); flow rate: 50 mL/min; monitored at 254 and 280 nm] affording phenol **13** (0.28 g, 1.3 mmol, 54%) as a clear oil. <sup>1</sup>H NMR (CDCl<sub>3</sub>, 600 MHz) δ 7.23 (1H, d, *J* = 8.4 Hz), 6.73 (1H, d, *J* = 8.4 Hz), 6.11 (1H, s), 3.85 (3H, s), 3.06 (2H, t, *J* = 6.6 Hz), 2.88 (2H, t, *J* = 6.6 Hz), 1.75 (4H, m), 1.49 (2H, p, *J* = 6 Hz). <sup>13</sup>C NMR (CDCl<sub>3</sub>, 150 Hz) δ 206.4, 148.7, 142.9, 133.7, 126.7, 120.1, 107.9, 56.0, 44.4, 25.9, 25.7, 25.3, 23.9.

**4.1.6. 1-((*tert*-Butyldimethylsilyl)oxy)-2-methoxy-benzocyclooct-5-one (14).** Phenol **13** (0.22 g, 1.0 mmol) was dissolved in DMF (50 mL). TBSCl (0.30 g, 2.0 mmol) and DIPEA (0.52 mL, 3.0 mmol) were added, and the reaction was stirred for 12 h at room temperature. The reaction mixture was washed with water (50 mL), extracted with EtOAc (5 x 30 mL), dried over sodium sulfate, and evaporated under reduced pressure. The crude reaction mixture was purified by flash chromatography using a pre-packed 25 g silica column [solvent A: EtOAc; solvent B: hexanes; gradient: 2%A / 98%B (1 CV), 2%A / 98%B → 20%A / 80%B (10 CV), 20%A / 80%B (2 CV); flow rate: 50 mL/min; monitored at 254 and 280 nm] affording TBS-protected ketone **14** (0.31 g, 0.93 mmol, quantitative) as a white solid. <sup>1</sup>H NMR (CDCl<sub>3</sub>, 600 MHz) δ 7.04 (1H, d, *J* = 8.4 Hz), 6.56 (1H, d, *J* = 9 Hz), 3.62 (3H, s), 2.87 (2H, t, *J* = 6 Hz), 2.69 (2H, t, *J* = 7.2 Hz), 1.58

(4H, m), 1.33 (2H, p,  $J = 3$  Hz), 0.81 (9H, s), 0.00 (6H, s).  $^{13}\text{C}$  NMR ( $\text{CDCl}_3$ , 150 Hz)  $\delta$  207.1, 151.9, 141.9, 133.7, 131.5, 120.9, 108.5, 54.5, 44.5, 26.2, 26.0, 25.8, 25.5, 23.7, 18.8, -3.9.

**4.1.7. 1-((*tert*-Butyldimethylsilyl)oxy)-2-methoxy-5-(3',4',5'-trimethoxyphenyl)-benzocyclooctan-5-ol (19).** To an oven dried flask containing THF (50 mL) was added 3,4,5-trimethoxyphenyl bromide (0.20 g, 0.81 mmol), and the solution was cooled to  $-78$  °C. *n*-BuLi (1.3 mL, 0.85 mmol) was slowly added to the reaction mixture, which was then stirred at  $-78$  °C for 1 h. TBS-protected **14** (0.20 g, 0.60 mmol) was added dropwise to the flask, and the reaction mixture was stirred while warming from  $-78$  °C to room temperature over 12 h, at which time the reaction mixture was washed with water, extracted with EtOAc (3 x 50 mL), dried over sodium sulfate, and evaporated under reduced pressure. The organic material was purified by flash chromatography using a pre-packed 25 g silica column [solvent A: EtOAc; solvent B: hexanes; gradient: 2%A / 98%B (1 CV), 2%A / 98%B  $\rightarrow$  20%A / 80%B (10 CV), 20%A / 80%B (2 CV); flow rate: 50 mL/min; monitored at 254 and 280 nm] affording tertiary alcohol **19** (0.044 g, 0.088 mmol, 15%) as a yellow oil. NMR characterization was performed after the next step.

**4.1.8. 1-((*tert*-Butyldimethylsilyl)oxy)-2-methoxy-5-(3',4',5'-trimethoxyphenyl)benzocyclooct-5-ene (22).** Acetic acid (10 mL) was added to tertiary alcohol **19** (0.044 g, 0.088 mmol), and the reaction mixture was stirred for 12 h at room temperature, at which time the mixture was washed with water (50 mL), extracted with EtOAc (3 x 30 mL), and dried over sodium sulfate. The organic phase was evaporated under reduced pressure, and the crude reaction mixture was purified by flash

chromatography using a pre-packed 10 g silica column [solvent A: EtOAc; solvent B: hexanes; gradient: 2%A / 98%B (1 CV), 2%A / 98%B → 20%A / 80%B (10 CV), 20%A / 80%B (2 CV)]; flow rate: 12 mL/min; monitored at 254 and 280 nm] affording TBS-protected **22** (0.022 g, 0.045 mmol, 52%) as a clear oil. <sup>1</sup>H NMR (CDCl<sub>3</sub>, 600 MHz) δ 6.68 (1H, d, *J* = 8.4 Hz), 6.56 (1H, d, *J* = 8.4 Hz), 6.42 (2H, s), 6.19 (1H, t, *J* = 7.8 Hz), 3.84, (3H, s), 3.80 (3H, s), 3.78 (6H, s), 3.27 (1H, overlapping doublets, *J* = 12.6 Hz), 2.23 (1H, m), 1.96 (1H, m), 1.75 (1H, m), 1.66 (1H, q, *J* = 22 Hz), 1.37 (2H, m), 1.02 (9H, s), 0.27 (3H, s), 0.24 (3H, s).

#### 4.1.9. 1-Hydroxy-2-methoxy-5-(3',4',5'- trimethoxyphenyl)-benzocyclooct-5-ene

(**23**). <sup>7</sup> TBS-protected benzocyclooctene **22** (0.022 g, 0.045 mmol) was dissolved in THF (10 mL), TBAF (0.031 g, 0.099 mmol) was added, and the reaction mixture was stirred at room temperature for 12 h. The solution was washed with water (50 mL), extracted with EtOAc (3 x 30 mL), dried over sodium sulfate, and evaporated under reduced pressure. The crude reaction mixture was purified by flash chromatography using a pre-packed 10 g silica column [solvent A: EtOAc; solvent B: hexanes; gradient: 3%A / 97%B (1 CV), 3%A / 97%B → 30%A / 70%B (10 CV), 30%A / 70%B (2 CV)]; flow rate: 36 mL/min; monitored at 254 and 280 nm] affording benzocyclooctene **23** (0.0053 g, 0.014 mmol, 33%) as a white solid. <sup>1</sup>H NMR (CDCl<sub>3</sub>, 600 MHz) δ 6.70 (1H, d, *J* = 8.4 Hz), 6.53 (1H, d, *J* = 8.4 Hz), 6.43 (2H, s), 6.21 (1H, t, *J* = 8.4 Hz), 5.76 (1H, s), 3.92 (3H, s), 3.84 (3H, s), 3.78 (6H, s), 3.25 (1H, dd, *J* = 12.6, 7.8 Hz), 2.30 (2H, m), 2.03 (1H, m), 1.79 (1H, m), 1.68 (1H, dt, *J* = 22.2, 11.4 Hz), 1.45 (1H, qd, *J* = 13.2, 4.8 Hz), 1.34 (1H, qd, *J* = 13.2, 4.8 Hz) <sup>13</sup>C NMR (CDCl<sub>3</sub>, 150 MHz) δ 152.8, 145.3, 142.7, 139.7, 139.1, 137.1, 132.3, 129.8, 129.7, 120.3, 107.8, 104.6, 60.9, 56.1, 56.0, 28.3, 26.5, 25.8, 24.7. HRMS:



Obsvd 393.1693 [M + Na<sup>+</sup>], Calcd for C<sub>22</sub>H<sub>26</sub>O<sub>5</sub>Na: 393.1672. HPLC: 16.61 min.

**4.1.10. Sodium 2-methoxy-5-(3',4',5'- trimethoxyphenyl)-benzocyclooct-5-en-1-yl phosphate (24).** Phosphorus oxychloride (0.18 mL, 1.9 mmol) was cooled to 0 °C in CH<sub>2</sub>Cl<sub>2</sub> (10 mL) and triethylamine (0.68 mL, 4.9 mmol) was added, and the reaction mixture was stirred for 5 min. Benzocyclooctene **23** (0.14 g, 0.38 mmol) in CH<sub>2</sub>Cl<sub>2</sub> (5 mL) was added to the reaction dropwise, and the reaction mixture was stirred at 0 °C for 1 h and then warmed to room temperature over 12 h. The mixture was then evaporated under reduced pressure. CH<sub>2</sub>Cl<sub>2</sub> (10 mL) was added to the resulting residue, and the resulting solution was again evaporated under reduced pressure. This was repeated two more times. The resulting solid was dissolved in a mixture of THF and water (2:1, 6 mL total) and stirred for 1 h. The solution was then cooled to 0 °C, and 0.1 M NaOH was added until a pH of 10 was achieved. The solution was then evaporated under reduced pressure, and the crude product was purified by a C18 30 g reversed phase column [solvent A: acetonitrile; solvent B: water; gradient: 10%A / 90%B (1 CV), 10%A / 90%B → 100%A / 0%B (10 CV), 100%A / 0%B (2 CV); flow rate: 25 mL/min; monitored at 254 and 280 nm] to afford phosphate salt **24** (0.06 g, 0.12 mmol, 32%) as a brown solid. <sup>1</sup>H NMR (D<sub>2</sub>O, 600 MHz) δ 6.69 (1H, d, *J* = 8.4 Hz), 6.52 (2H, s), 6.47 (1H, d, *J* = 8.4 Hz), 6.20 (1H, t, *J* = 7.4 Hz), 3.72 (3H, s), 3.67 (6H, s), 3.63 (3H, s), 3.45 (1H, dd, *J* = 13.2, 8.4 Hz), 2.14 (1H, dt, *J* = 13.8, 8.4), 2.05 (1H, t, *J* = 12 Hz), 1.91 (1H, m), 1.63 (1H, m), 1.43 (1H, dt, *J* = 22.2, 12 Hz), 1.30 (1H, qd, *J* = 13.2, 4.8 Hz), 1.16 (1H, qd, *J* = 13.2, 4.8 Hz). <sup>13</sup>C NMR (D<sub>2</sub>O, 150 MHz) δ 152.2, 151.4 (d, *J* = 2.25 Hz), 141.1 (d, *J* = 6.75 Hz), 140.0, 138.8, 138.0 (d, *J* = 3.38 Hz), 135.8, 131.5, 131.2, 123.8, 109.5, 104.9, 60.9, 56.0, 55.6, 28.1, 26.6, 26.3, 23.8. <sup>31</sup>P NMR (D<sub>2</sub>O, 242 MHz) δ -0.25. HRMS: Obsvd

495.1249 [M + H], Calcd for C<sub>22</sub>H<sub>26</sub>O<sub>8</sub>Na<sub>2</sub>P<sup>+</sup>: 495.1155 HPLC: 5.46 min.

**4.1.11. 1,2-Dimethoxy-5-(3',4',5'- trimethoxyphenyl)-benzocyclooctan-5-ol (17).** To an oven dried flask, THF (50 mL) and 3,4,5-trimethoxyphenyl bromide (0.26 g, 1.0 mmol) were added, and the solution was cooled to -78 °C. *n*-BuLi (0.44 mL, 1.1 mmol) was slowly added to the reaction mixture, which was then stirred at -78 °C for 1 h. Benzocyclooctone **5** (0.18 g, 0.77 mmol) was added dropwise to the flask, and the reaction was stirred while warming from -78 °C to room temperature over 12 h, at which time the reaction mixture was washed with water (50 mL), extracted with EtOAc (3 x 50 mL), dried over sodium sulfate, and evaporated under reduced pressure. The crude product was purified by flash chromatography using a pre-packed 25 g silica column [solvent A: EtOAc; solvent B: hexanes; gradient: 7%A / 93%B (1 CV), 7%A / 93%B → 60%A / 40%B (10 CV), 60%A / 40%B (2 CV); flow rate: 50 mL/min; monitored at 254 and 280 nm] affording tertiary alcohol **17** (0.15 g, 0.37 mmol, 48%) as a clear oil. NMR characterization was performed after the next step.

**4.1.12. 1,2-Dimethoxy-5-(3',4',5'- trimethoxyphenyl)-benzocyclooct-5-ene (20).**

Acetic acid (20 mL) was added to tertiary alcohol **17** (0.15 g, 0.37 mmol), and the reaction mixture was stirred for 12 h at room temperature, at which time the mixture was washed with water (50 mL), extracted with EtOAc (3 x 30 mL), and dried over sodium sulfate. The organic phase was evaporated under reduced pressure, and the crude organic product was purified by flash chromatography using a pre-packed 10 g silica column [solvent A: EtOAc; solvent B: hexanes; gradient: 7%A / 93%B (1 CV), 7%A / 93%B → 60%A / 40%B (10 CV), 60%A / 40%B (2 CV); flow rate: 12 mL/min; monitored at 254 and 280 nm] affording benzocyclooctene **20** (0.082 g, 0.213 mmol, 59%) as a white solid.

$^1\text{H}$  NMR ( $\text{CDCl}_3$ , 600 MHz)  $\delta$  6.74 (1H, d,  $J = 8.5$  Hz), 6.72 (1H, d,  $J = 8$  Hz), 6.41 (2H, s), 6.21 (1H, dd,  $J = 10.8, 9$  Hz), 3.93 (3H, s), 3.88 (3H, s), 3.84 (3H, s), 3.78 (6H, s), 3.24 (1H, dd,  $J = 15, 9.6$  Hz), 2.27 (2H, m), 2.06 (1H, m), 1.77 (1H, m), 1.65 (1H, dt,  $J = 25.2, 12.6$  Hz), 1.37 (2H, m).  $^{13}\text{C}$  NMR ( $\text{CDCl}_3$ , 150 MHz)  $\delta$  152.8, 151.8, 146.3, 139.7, 139.0, 137.5, 137.2, 131.9, 129.7, 124.8, 109.5, 104.7, 60.9, 60.7, 56.1, 55.6, 28.3, 27.8, 26.0, 24.6. HRMS: Obsvd 407.1859 [ $\text{M} + \text{Na}^+$ ], Calcd for  $\text{C}_{19}\text{H}_{28}\text{O}_2\text{Na}$ : 407.1829.

HPLC: 18.53 min.

**4.1.13. 6-(3'-Methoxyphenyl)hex-5-enoic acid (2).**<sup>80</sup> To a well-stirred solution of 4-(carboxybutyl)triphenyl phosphonium bromide (16.29 g, 36.75 mmol) dissolved in THF (500 mL) at rt was added potassium *tert*-butoxide (9.09 g, 81.0 mmol). After 1 h, 2,3-dimethoxybenzaldehyde (4.47 mL, 36.8 mmol) dissolved in THF (100 mL) was added to the original reaction mixture, and the resulting reaction mixture was stirred at room temperature for 12 h. The THF was evaporated under reduced pressure, and the resulting material was quenched with 2 M HCl (100 mL) and extracted with EtOAc (2 x 100 mL). The combined organic layer was evaporated under reduced pressure and purified by flash chromatography using a pre-packed 100 g silica column [solvent A: EtOAc; solvent B: hexanes; gradient: 10%A / 90%B (1 CV), 10%A / 90%B  $\rightarrow$  80%A / 20%B (10 CV), 80%A / 20%B (2 CV); flow rate: 40 mL/min; monitored at 254 and 280 nm] affording carboxylic acid **2** (8.01 g, 36.7 mmol, 99%) as a yellow oil. NMR characterization was performed after the next step.

**4.1.14. 6-(3'-Methoxyphenyl)hexanoic acid (4).**<sup>81,82</sup> To dissolved carboxylic acid **2** (8.01 g, 36.7 mmol) in MeOH (150 mL) was added 10% Pd on carbon (0.46 g) and  $\text{H}_2$  gas (balloon). The reaction mixture was stirred at room temperature for 12 h. The mixture

was then filtered through Celite®, the Celite® was washed with EtOAc (3 x 50 mL), and the filtrate (MeOH and EtOAc) was evaporated under reduced pressure. The combined organic material was purified by flash chromatography using a pre-packed 100 g silica column [solvent A: EtOAc; solvent B: hexanes; gradient: 7%A / 93%B (1 CV), 7%A / 93%B → 60%A / 40%B (10 CV), 60%A / 40%B (2 CV); flow rate: 40 mL/min; monitored at 254 and 280 nm] to afford carboxylic acid **4** (7.53 g, 33.9 mmol, 93%) as a colorless oil. <sup>1</sup>H NMR (CDCl<sub>3</sub>, 600 MHz) δ 7.21 (1H, t, *J* = 10.2 Hz), 6.78 (1H, d, *J* = 9.6 Hz), 6.76 (2H, m), 3.81 (3H), 2.62 (2H, t, *J* = 9 Hz), 2.38 (2H, t, *J* = 9 Hz), 1.67 (4H, overlapping pentets, *J* = 9 Hz), 1.41 (2H, p, *J* = 9.6 Hz).

**4.1.15. 2-Methoxy-benzocyclooct-5-ene (6).** <sup>69,82-84</sup> Carboxylic acid **4** (7.53 g, 33.9 mmol) was dissolved in CH<sub>2</sub>Cl<sub>2</sub> (100 mL) and cooled to 0 °C. Eaton's reagent (68 mL, 3 g per mmol of compound **4**) was added, and the mixture was stirred while warming to room temperature over 12 h, at which time it was poured over ice, which was allowed to melt, and the solution was neutralized with NaHCO<sub>3</sub>. The organic layer was extracted with EtOAc (3 x 50 mL), dried over sodium sulfate, evaporated under reduced pressure, and purified by flash chromatography using a pre-packed 100 g silica column [solvent A: EtOAc; solvent B: hexanes; gradient: 5%A / 95%B (1 CV), 5%A / 95%B → 40%A / 60%B (10 CV), 40%A / 60%B (2 CV); flow rate: 40 mL/min; monitored at 254 and 280 nm] to afford ketone **6** (0.45 g, 2.2 mmol, 7 %) as a yellow oil. <sup>1</sup>H NMR (CDCl<sub>3</sub>, 600 MHz) δ 7.81 (1H, d, *J* = 9 Hz), 6.63 (1H, dd, *J* = 9, 2.4 Hz), 6.51 (1H, d, *J* = 3 Hz), 3.65 (3H, s), 2.94 (2H, t, *J* = 6.6 Hz), 2.81 (2H, t, *J* = 7.2 Hz), 1.67 (2H, p, *J* = 7.2 Hz), 1.61 (2H, p, *J* = 6.6 Hz), 1.26 (2H, p, *J* = 6 Hz). <sup>13</sup>C NMR (CDCl<sub>3</sub>, 150 Hz) δ 202.4, 162.8, 143.1, 132.2, 131.4, 116.5, 111.5, 55.1, 42.6, 35.3, 27.6, 24.5, 23.0.

**4.1.16. 2-Methoxy-5-(3',4',5'-trimethoxyphenyl)-benzocyclooctan-5-ol (18).** To an oven dried flask containing THF (50 mL) was added 3,4,5-trimethoxyphenyl bromide (0.73 g, 3.0 mmol), and the solution was cooled to -78 °C. *n*-BuLi (4.9 mL, 3.1 mmol) was slowly added to the reaction mixture, which was then stirred at -78 °C for 1 h. Ketone **6** (0.45 g, 2.2 mmol) was then added dropwise to the flask, and the reaction mixture was stirred while warming from -78 °C to room temperature over 12 h, at which time the reaction mixture was washed with water, extracted with EtOAc (3 x 50 mL), dried over sodium sulfate, and evaporated under reduced pressure. The crude reaction mixture was purified by flash chromatography using a pre-packed 25 g silica column [solvent A: EtOAc; solvent B: hexanes; gradient: 7%A / 93%B (1 CV), 7%A / 93%B → 60%A / 40%B (10 CV), 60%A / 40%B (2 CV); flow rate: 50 mL/min; monitored at 254 and 280 nm] to afford tertiary alcohol **18** (0.18 g, 0.48 mmol, 22%) as a yellow oil. NMR characterization was performed after the next step.

**4.1.17. 2-Methoxy-5-(3',4',5'-trimethoxyphenyl)-benzocyclooct-5-ene (21).** Acetic acid (10 mL) was added to tertiary alcohol **18** (0.18 g, 0.48 mmol), and the reaction mixture was stirred for 12 h at rt, at which time the mixture was washed with water (50 mL), extracted with EtOAc (3 x 30 mL), and dried over sodium sulfate. The organic phase was evaporated under reduced pressure, and the crude reaction mixture was purified by flash chromatography using a pre-packed 10 g silica column [solvent A: EtOAc; solvent B: hexanes; gradient: 5%A / 95%B (1 CV), 5%A / 95%B → 40%A / 60%B (10 CV), 40%A / 60%B (2 CV); flow rate: 12 mL/min; monitored at 254 and 280 nm] to afford benzocyclooctene **21** (0.089 g, 0.25 mmol, 52%) as a white solid. <sup>1</sup>H NMR (CDCl<sub>3</sub>, 600 MHz) δ 6.95 (1H, d, *J* = 8.4 Hz), 6.85 (1H, d, *J* = 2.4 Hz), 6.73 (1H, dd, *J* =

6.4, 2.4 Hz), 6.44 (2H, s), 6.24 (1H, dd,  $J = 9, 7.8$  Hz), 3.863 (3H, s), 3.857 (3H, s), 3.80 (6H, s), 2.83 (1H, dd,  $J = 13.2, 7.8$  Hz), 2.56 (1H, t,  $J = 12.6$  Hz), 2.29 (1H, dt,  $J = 13.8, 7.8$  Hz), 2.07 (1H, m), 1.80 (1H, m) 1.64 (1H, dt,  $J = 21, 10.8$  Hz), 1.41 (1H, qd,  $J = 12.6, 4.8$  Hz), 1.34 (1H, qd,  $J = 13.2, 5.4$  Hz).  $^{13}\text{C}$  NMR ( $\text{CDCl}_3$ , 150 Hz)  $\delta$  159.0, 152.8, 144.6, 139.7, 139.0, 137.1, 130.7, 129.3, 114.0, 111.4, 104.6, 60.9, 56.1, 55.2, 33.5, 28.8, 28.3, 24.9. HRMS: Obsvd 377.1724 [ $\text{M} + \text{Na}^+$ ], Calcd for  $\text{C}_{22}\text{H}_{26}\text{O}_4\text{Na}$ : 377.1723. HPLC: 19.29 min.

**4.1.18. 3-(2',3'-Dimethoxyphenyl)propanoic acid (9).**<sup>85,86</sup> *Trans*-2,3-

dimethoxycinnamic acid (7) (5.00 g, 24.0 mmol) was dissolved in MeOH (100 mL), 10% Pd on carbon (0.82 g) was added, and the mixture was stirred for 12 h under  $\text{H}_2$  (balloon). The mixture was then filtered through Celite®, the Celite® was washed with EtOAc (2 x 50 mL). The organic layer (EtOAc and MeOH) was dried over sodium sulfate, concentrated and purified by flash chromatography using a prepacked 100 g silica column [solvent A: EtOAc; solvent B: hexane; gradient: 7%A/ 93%B (1 CV), 7%A/ 93%B  $\rightarrow$  60%A/ 40%B (10 CV), 60%A/40%B (2 CV); flow rate: 40 mL/min; monitored at 254 nm and 280 nm] to afford carboxylic acid 9 (4.34 g, 20.6 mmol, 86%) as a white solid.  $^1\text{H}$  NMR ( $\text{CDCl}_3$ , 500 MHz)  $\delta$  11.91 (1H, s), 6.97 (1H, t,  $J = 8$  Hz), 6.78 (2H, d,  $J = 8$  Hz), 3.85 (3H, s), 3.80 (3H, s), 2.98 (2H, t,  $J = 7.5$  Hz), 2.67 (2H, t,  $J = 7.5$  Hz).  $^{13}\text{C}$  NMR ( $\text{CDCl}_3$ , 150 MHz)  $\delta$  179.4, 152.7, 147.1, 133.9, 124.0, 121.7, 111.0, 60.4, 55.5, 34.7, 25.3.

**4.1.19. 4,5-Dimethoxy-2,3-dihydro-1H-inden-1-one (11).**<sup>85,87</sup> Carboxylic acid 9 (4.99 g, 23.7 mmol) was mixed with Eaton's reagent (47.5 mL, 3 g per mmol of carboxylic acid 9) and stirred for 72 h at room temperature. The mixture was then poured over ice,

neutralized, and extracted with EtOAc (3 x 75 mL). The organic layer was dried over sodium sulfate, concentrated and purified by flash chromatography using a prepacked 100 g silica column [solvent A: EtOAc; solvent B: hexane; gradient: 7%A/93%B (1 CV), 7%A/ 93%B → 60%A/ 40%B (10 CV), 60%A/ 40%B (2 CV); flow rate: 40 mL/min; monitored at 254 nm and 280 nm] to afford ketone **11** (2.01 g, 10.5 mmol, 44%) as a yellow solid. <sup>1</sup>H NMR (CDCl<sub>3</sub>, 600 MHz) δ 7.06 (1H, d, *J* = 8.4 Hz), 6.62 (1H, d, *J* = 8.4 Hz), 3.61 (3H, s), 3.57 (3H, s), 2.70 (2H, t, *J* = 5.4 Hz), 2.25 (2H, t, *J* = 5.4 Hz). <sup>13</sup>C NMR (CDCl<sub>3</sub>, 150 MHz) δ 204.6, 157.1, 147.4, 145.0, 130.7, 119.4, 112.0, 59.8, 55.8, 36.0, 22.1.

**4.1.20. 4-Hydroxy-5-methoxy-2,3-dihydro-1*H*-inden-1-one (15).**<sup>70,88,89</sup> Ketone **11** (0.70 g, 3.2 mmol) was added to a 20 mL microwave vial with [TMAH][Al<sub>2</sub>Cl<sub>7</sub>] (10.0 mL, 7.26 mmol) and microwaved for 1 h at 80 °C. The mixture was poured into water, extracted with CH<sub>2</sub>Cl<sub>2</sub> (3 x 30 mL), dried over sodium sulfate and purified by flash chromatography using a prepacked 50 g silica column [solvent A: EtOAc; solvent B: hexane; gradient: 12%A/ 88%B (1 CV), 12%A/ 88%B → 100%A/ 0%B (10 CV), 100%A/ 0%B (2 CV); flow rate: 50 mL/min; monitored at 254 nm and 280 nm] to afford phenol **15** (0.42 g, 2.36 mmol, 72%) as a brown solid. <sup>1</sup>H NMR (CDCl<sub>3</sub>, 600 MHz) δ 7.35 (1H, d, *J* = 10.2 Hz), 6.92 (1H, d, *J* = 10.2 Hz), 5.81 (1H, s), 3.97 (3H, s), 3.07 (2H, t, *J* = 6.6 Hz), 2.69 (2H, t, *J* = 6.6 Hz). <sup>13</sup>C NMR (CDCl<sub>3</sub>, 150 MHz) δ 206.0, 150.9, 142.1, 140.5, 131.4, 116.1, 110.4, 56.4, 36.5, 21.9.

**4.1.21. 4-((*tert*-Butyldimethylsilyl)oxy)-5-methoxy-2,3-dihydro-1*H*-inden-1-one (16).** Phenol **15** (0.90 g, 5.1 mmol) was dissolved in DMF (25 mL), and TBSCl (0.71 g, 4.7 mmol) was added, followed by the addition of DIPEA (1.24 mL, 7.08 mmol). The

mixture was stirred for 12 h at room temperature, washed with water, and extracted with EtOAc (5 x 50 mL). The organic layer was dried over sodium sulfate, concentrated and purified by flash chromatography using a prepacked 50 g silica column [solvent A: EtOAc; solvent B: hexane; gradient: 7%A/ 93%B (1 CV), 7%A/ 93%B → 60%A/ 40%B (10 CV), 60%A/ 40%B (2 CV); flow rate: 50 mL/min; monitored at 254 nm and 280 nm] to afford TBS-protected **16** (0.63 g, 2.2 mmol, 91%) as a white solid. <sup>1</sup>H NMR (CDCl<sub>3</sub>, 500 MHz) δ 7.30 (1H, d, *J* = 8.5 Hz), 6.83 (1H, d, *J* = 8.5 Hz), 3.81 (3H, s), 2.94 (2H, t, *J* = 6 Hz), 2.56 (2H, t, *J* = 6 Hz), 0.95 (9H, s), 0.12 (6H s). <sup>13</sup>C NMR (CDCl<sub>3</sub>, 150 MHz) δ 205.8, 155.0, 146.3, 141.4, 131.1, 117.4, 111.5, 55.4, 36.4, 25.9, 22.9, 18.6, -4.1.

**4.1.22. 4-((*tert*-Butyldimethylsilyloxy)-5-methoxy-1-(3',4',5'-trimethoxyphenyl)-2,3-dihydro-1*H*-inden-1-ol (27).** 5-Bromo-1,2,3-trimethoxybenzene (0.51 g, 2.1 mmol) was dissolved in THF (25 mL) and cooled to -78 °C. *n*-BuLi (1.22 mL, 3.05 mmol) was added dropwise, and the reaction mixture was stirred for 1 h. TBS-protected **16** (0.43 g, 1.53 mmol) was dissolved in THF (10 mL) and added dropwise to the reaction flask, and the mixture was stirred for 12 h while warming to room temperature, at which time it was washed with water, extracted with EtOAc (3 x 30 mL), dried over sodium sulfate, concentrated, and purified by flash chromatography using a prepacked 50 g silica column [solvent A: EtOAc; solvent B: hexane; gradient: 7%A/ 93%B (2 CV), 7%A/ 93%B → 60%A/ 40%B (10 CV), 60%A/40%B (2 CV); flow rate: 50 mL/min; monitored at 254 nm and 280 nm] to afford tertiary alcohol **27** (0.37 g, 0.80 mmol, 37%) as a yellow oil. NMR characterization was performed after the next step.

**4.1.23. *tert*-Butyl((6-methoxy-3-(3',4',5'-trimethoxyphenyl)-1*H*-inden-7-yl)oxy)dimethylsilane (30).** Acetic acid (15 mL) was added to tertiary alcohol **27** (0.37



g, 0.80 mmol), and the reaction mixture was stirred at room temperature for 12 h, at which time it was washed with water and extracted with EtOAc (3 x 30 mL). The combined organic layer was dried over sodium sulfate, concentrated, and purified by flash chromatography using a prepacked 25 g silica column [solvent A: EtOAc; solvent B: hexane; gradient: 7%A/ 93%B (1 CV), 7%A/ 93%B → 60%A/40%B (10 CV), 60%A/40%B (2 CV); flow rate: 25 mL/min; monitored at 254 nm and 280 nm] to afford TBS-protected **30** (0.14 g, 0.32 mmol, 39%) as a clear oil. <sup>1</sup>H NMR (CDCl<sub>3</sub>, 600 MHz) δ 6.92 (1H, d, *J* = 6.5 Hz), 6.64 (1H, d, *J* = 7 Hz), 6.59 (2H, s), 6.19 (1H, t, *J* = 2 Hz), 3.69 (9H, s), 3.62 (3H, s), 3.23 (2H, d, *J* = 2 Hz), 0.84 (9H, s), 0.00 (6H, s). <sup>13</sup>C NMR (CDCl<sub>3</sub>, 150 MHz) δ 153.3, 148.8, 144.9, 141.2, 138.2, 137.5, 135.7, 132.1, 128.8, 113.2, 110.3, 104.7, 61.0, 56.2, 55.6, 35.9, 26.1, 18.7, -4.1.

**4.1.24. 6-Methoxy-3-(3',4',5'-trimethoxyphenyl)-1*H*-inden-7-ol (31).**<sup>7</sup> TBS-protected **30** (0.46 g, 1.0 mmol) was dissolved in THF (5 mL), TBAF (5.2 mL, 5.2 mmol) was added, and the reaction mixture was stirred at room temperature for 12 h, at which time the mixture was washed with water, extracted with EtOAc (3 x 40 mL), dried with sodium sulfate, evaporated under reduced pressure, and purified by flash chromatography using a prepacked 25 g silica column [solvent A: EtOAc; solvent B: hexane; gradient: 12%A/ 88%B (1 CV), 12%A/ 88%B → 100%A/ 0%B (10 CV), 100%A/ 0%B (2 CV); flow rate: 25 mL/min; monitored at 254 nm and 280 nm] to afford indene **31** (0.23 g, 0.70 mmol, 68%) as a yellow oil. <sup>1</sup>H NMR (CDCl<sub>3</sub>, 600 MHz) δ 7.08 (1H, d, *J* = 7.8 Hz), 6.87 (1H, d, *J* = 7.8 Hz), 6.80 (2H, s), 6.46 (1H, t, *J* = 2.4 Hz), 5.78 (1H, s), 3.94 (3H, s), 3.91 (9H, s), 3.48 (2H, d, *J* = 2.4 Hz). <sup>13</sup>C NMR (CDCl<sub>3</sub>, 150 MHz) δ 153.3, 144.9, 144.8, 141.8, 139.7, 138.7, 137.6, 131.9, 129.37, 139.35, 111.7, 109.2, 104.8, 61.0, 56.5, 56.2,

34.8. HRMS: Obsvd 351.1203 [M+Na]<sup>+</sup>, calcd for C<sub>19</sub>H<sub>20</sub>O<sub>5</sub>Na: 351.1208. HPLC: 12.84 min.

#### 4.1.25. Sodium 6-methoxy-3-(3',4',5'-trimethoxyphenyl)-1*H*-inden-7-yl phosphate

**(32)**. POCl<sub>3</sub> (0.26 mL, 2.8 mmol) was cooled to 0 °C in CH<sub>2</sub>Cl<sub>2</sub> (10 mL). Indene **31** (0.23 g, 0.70 mmol) and pyridine (0.20 mL, 2.5 mmol) in CH<sub>2</sub>Cl<sub>2</sub> (5 mL) was added to the reaction mixture dropwise, and the reaction mixture was stirred at 0 °C for 1 h. The mixture was then warmed to room temperature over 12 h. The mixture was then evaporated under reduced pressure. CH<sub>2</sub>Cl<sub>2</sub> (10 mL) was added to the resulting residue, and the mixture was again evaporated under reduced pressure. This was repeated two more times. The resulting solid was dissolved in a mixture of THF and water (2:1, 6 mL total) and stirred for 1 h. The solution was then cooled to 0 °C, and 0.1 M NaOH was added until a pH of 10 was achieved. The solution was then evaporated under reduced pressure, and the crude product was purified by a C18 30 g reversed phase column [solvent A: acetonitrile; solvent B: water; gradient: 10%A / 90%B (1 CV), 10%A / 90%B → 100%A / 0%B (10 CV), 100%A / 0%B (2 CV); flow rate: 25 mL/min; monitored at 254 and 280 nm] to afford phosphate salt **32** (0.09 g, 0.20 mmol, 28%) as a light brown solid. <sup>1</sup>H NMR (600 MHz, D<sub>2</sub>O) δ 6.98 (1H, d, *J* = 8.4 Hz), 6.81 (1H, d, *J* = 7.8 Hz), 6.67 (2H, s), 6.39 (1H, t, *J* = 1.8 Hz), 3.79 (3H, s), 3.68 (6H, s), 3.65 (3H, s), 3.58 (2H, s). <sup>13</sup>C NMR (150 MHz, D<sub>2</sub>O) δ 152.4, 150.0 (d, *J* = 3 Hz), 142.8, 139.5 (d, *J* = 6.4 Hz), 138.2 (d, *J* = 2.5 Hz), 137.4, 136.0, 132.4, 130.8, 115.0, 111.1, 104.8, 60.9, 56.3, 55.9, 36.3. <sup>31</sup>P NMR (242 MHz, D<sub>2</sub>O) δ 0.60. HRMS: Obsvd 453.0687 [M + H], Calcd for C<sub>19</sub>H<sub>20</sub>O<sub>8</sub>Na<sub>2</sub>P<sup>+</sup>: 453.0686 HPLC: 4.04 min.

**4.1.26. 4,5-Dimethoxy-1-(3',4',5'-trimethoxyphenyl)-2,3-dihydro-1H-inden-1-ol (25).**

5-Bromo-1,2,3-trimethoxybenzene (1.60 g, 6.47 mmol) was dissolved in THF (50 mL) and cooled to -78 °C. *n*-BuLi (2.7 mL, 6.8 mmol) was added dropwise, and the reaction mixture was stirred for 1 h. Ketone **11** (0.92 g, 4.79 mmol) was dissolved in THF (10 mL) and added dropwise to the reaction flask, and the mixture was stirred for 12 h while warming to room temperature, at which time it was washed with water, extracted with EtOAc (3 x 30 mL), dried over sodium sulfate, concentrated, and purified by flash chromatography using a prepacked 50 g silica column [solvent A: EtOAc; solvent B: hexane; gradient: 10%A/ 90%B (1 CV), 10%A/ 90%B → 80%A/ 20%B (10 CV), 80%A/ 20%B (1 CV); flow rate: 50 mL/min; monitored at 254 nm and 280 nm] to afford tertiary alcohol **25** (1.221 g, 3.39 mmol, 71%) as an orange oil. NMR data was collected after the subsequent step.

**4.1.27. 6,7-Dimethoxy-3-(3',4',5'-trimethoxyphenyl)-1H-indene (28).** Acetic acid (25 mL) was added to tertiary alcohol **25** (1.22 g 3.39 mmol), and the mixture was stirred at room temperature for 12 h. The mixture was washed with water, extracted with EtOAc (3 x 30 mL), dried over sodium sulfate, concentrated under reduced pressure, and purified by flash chromatography using a prepacked 50 g silica column [solvent A: EtOAc; solvent B: hexane; gradient: 7%A/ 93%B (1 CV), 7%A/ 93%B → 60%A/ 40%B (10 CV), 60%A/ 40%B (2 CV); flow rate: 40 mL/min; monitored at 254 nm and 280 nm] to afford indene **28** (0.56 g, 1.64 mmol, 48%) as a brown solid. <sup>1</sup>H NMR (CDCl<sub>3</sub>, 600 MHz) δ 7.28 (1H, d, *J* = 8 Hz), 6.93 (1H, d, *J* = 8.5 Hz), 6.83 (2H, s), 6.44 (1H, s), 3.99 (3H, s), 3.93 (3H, s), 3.91 (9H, s), 3.53 (2H, s). <sup>13</sup>C NMR (CDCl<sub>3</sub>, 150 MHz) δ 153.1, 150.2, 145.2,

144.5, 138.2, 137.4, 136.4, 131.6, 128.6, 115.2, 110.9, 104.5, 60.6, 59.8, 56.0, 55.8, 35.2.

HRMS: Obsvd 365.1385  $[M+Na]^+$ , calcd for  $C_{20}H_{22}O_5Na$ : 365.1359. HPLC: 14.96 min.

**4.1.28. 3-(3'-Methoxyphenyl)propanoic acid (10).**<sup>90</sup> 3-methoxycinnamic acid (**8**) (3.56 g, 19.98 mmol) was dissolved in MeOH (100 mL), and 10% Pd on carbon (0.44 g) was added. The mixture was stirred for 12 h at room temperature under  $H_2$  (balloon). The reaction mixture was then filtered through Celite®, and the Celite® was washed with EtOAc (3 x 30 mL). The filtrate (EtOAc and MeOH) was evaporated under reduced pressure resulting in carboxylic acid **10** (3.59 g, 19.7 mmol, quantitative).  $^1H$  NMR ( $CDCl_3$ , 600 MHz)  $\delta$  11.93 (1H, s), 7.27 (1H, t,  $J = 7.5$  Hz), 6.88 (2H, m), 6.83 (1H, d,  $J = 8$  Hz), 3.79 (3H, s), 2.99 (2H, t,  $J = 7$  Hz), 2.73 (2H, t,  $J = 7$  Hz).  $^{13}C$  NMR ( $CDCl_3$ , 150 MHz)  $\delta$  179.2, 159.9, 142.0, 129.6, 120.7, 114.2, 111.6, 54.9, 35.5, 30.6.

**4.1.29. 5-Methoxy-2,3-dihydro-1H-inden-1-one (12).**<sup>8,91</sup> Eaton's reagent (43 mL, 3 g/mmol of carboxylic acid **10**) was added to carboxylic acid **10** (3.95 g, 21.9 mmol), and the reaction mixture was stirred at room temperature for 72 h. It was then poured over ice, neutralized, and extracted with EtOAc (3 x 50 mL). The organic layer was dried over sodium sulfate, concentrated, and purified by flash chromatography using a prepacked 100 g silica column [solvent A: EtOAc; solvent B: hexane; gradient: 12%A/ 88%B (1 CV), 12%A/ 88%B  $\rightarrow$  100%A/ 0%B (10 CV), 100%A/ 0%B (10 CV); flow rate: 50 mL/min; monitored at 254 nm and 280 nm] to afford ketone **12** (2.26 g, 13.9 mmol, 64%) as a green solid.  $^1H$  NMR ( $CDCl_3$ , 600 MHz)  $\delta$  7.49 (1H, d,  $J = 7.5$  Hz), 6.72 (2H, m), 3.72 (3H, s), 2.91 (2H, t,  $J = 6$  Hz), 2.48 (2H, t,  $J = 5.5$  Hz).  $^{13}C$  NMR ( $CDCl_3$ , 150 MHz)  $\delta$  205.0, 165.1, 158.1, 130.2, 125.0, 115.2, 109.6, 55.5, 36.3, 25.7.

**4.1.30. 5-Methoxy-1-(3',4',5'-trimethoxyphenyl)-2,3-dihydro-1*H*-inden-1-ol (26).**<sup>8</sup>

5-Bromo-1,2,3-trimethoxybenzene (1.95 g, 7.91 mmol) was dissolved in THF (50 mL), and the mixture was cooled to -78 °C. *n*-BuLi (3.3 mL, 8.3 mmol) was added dropwise, and the reaction mixture was stirred for 1 h. Ketone **12** (0.95 g, 5.86 mmol) was dissolved in THF (10 mL) and added dropwise to the reaction flask, and the mixture was stirred for 12 h warming to room temperature, at which time it was washed with water, extracted with EtOAc (3 x 30 mL), dried over sodium sulfate, concentrated under reduced pressure, and purified by flash chromatography using a prepacked 100 g silica column [solvent A: EtOAc; solvent B: hexane; gradient: 10%A/ 90%B (1 CV), 10%A/ 90%B → 80%A/ 20%B (10 CV), 80%A/ 20%B (2 CV); flow rate: 50 mL/min; monitored at 254 nm and 280 nm] to afford tertiary alcohol **26** (1.45 g, 4.39 mmol, 75%) as a yellow oil. NMR data was collected after the subsequent step.

**4.1.30. 6-Methoxy-3-(3',4',5'-trimethoxyphenyl)-1*H*-indene (29).**<sup>8</sup>

Acetic acid (25 mL) was added to tertiary alcohol **26** (1.45 g 4.39 mmol) and stirred at room temperature for 12 h. The mixture was washed with water, extracted with EtOAc (3 x 30 mL), dried over sodium sulfate, concentrated, and purified by flash chromatography using a prepacked 100 g silica column [solvent A: EtOAc; solvent B: hexane; gradient: 7%A/ 93%B (1 CV), 7%A/93%B → 60%A/ 40%B (10 CV), 60%A/ 40%B (1 CV); flow rate: 50 mL/min; monitored at 254 nm and 280 nm] to afford indene **29** (1.30 g, 4.16 mmol, 95%) as a red-yellow oil. <sup>1</sup>H NMR (CDCl<sub>3</sub>, 600 MHz) δ 7.47 (1H, d, *J* = 8.5 Hz), 7.08 (1H, d, *J* = 2 Hz), 6.86 (1H, dd, *J* = 10.5, 2 Hz), 6.81 (2H, s), 6.38 (1H, t, *J* = 2 Hz), 3.90 (3H, s), 3.87 (6H, s), 3.79 (3H, s), 3.40 (2H, d, *J* = 1 Hz). <sup>13</sup>C NMR (CDCl<sub>3</sub>, 150 MHz) δ 150.1, 153.3, 146.7, 144.6, 137.6, 136.8, 132.0, 128.4, 120.5, 111.8, 110.6, 104.7, 60.8, 56.1, 55.4,

38.0. HRMS: Obsvd 335.1281  $[M+Na]^+$ , calcd for  $C_{19}H_{20}O_4Na$ : 335.1254. HPLC: 15.95 min.

## 4.2. Biological Evaluations

**4.2.1. SRB Assay.** <sup>92,93</sup> Inhibition of growth of human cancer cells was assessed using the sulforhodamine B assay (SRB), as previously described.<sup>92</sup> Cancer cell lines (DU-145, SK-OV-3, and NCI-H460) were plated at 7500-8000 cells/well into 96-well plates using DMEM supplemented with 5% fetal bovine serum/ 1% gentamicin sulfate and incubated for 24 h at 37°C in a humidified incubator. Compound serial dilutions were then added. After 48 h treatment, the cells were fixed with trichloroacetic acid (10% final concentration), washed, dried, stained with sulforhodamine B dye (Acid red 52), washed to remove excess dye, and dried. SRB dye was solubilized, and absorbances were measured at wavelength 540 nm and normalized to values at wavelength 630 nm using an automated Biotek plate reader. A growth inhibition of 50% ( $GI_{50}$  or the drug concentration causing 50% reduction in the net protein increase) was calculated from the absorbance data.

**4.2.2. Colchicine Binding Assay.** Inhibition of [ $^3H$ ]colchicine binding to tubulin was measured using reaction mixtures (100  $\mu$ L each) containing 1.0  $\mu$ M tubulin, 5.0  $\mu$ M [ $^3H$ ]colchicine (from Perkin-Elmer), 5% (v/v) dimethyl sulfoxide, potential inhibitors at 5.0  $\mu$ M, and components that stabilize the colchicine binding activity of tubulin<sup>94</sup> (1.0 M monosodium glutamate [adjusted to pH 6.6 with HCl in a 2.0 M stock solution], 0.5 mg/mL bovine serum albumin, 0.1 M glucose-1-phosphate, 1.0 mM  $MgCl_2$ , and 1.0 mM GTP). Incubation was for 10 min at 37 °C, a time point selected because the binding

reaction in control reaction mixtures is 40-60% complete. Reactions were stopped with 2.0 mL of ice-cold water, and the reaction mixtures were placed on ice. Each sample was poured onto a stack of two DEAE-cellulose filters (from Whatman), followed by 6 mL of ice-cold water. The samples were aspirated under reduced vacuum. The filters were washed three times with 2 mL water and placed into vials containing 5 mL of Biosafe II scintillation cocktail. Samples were counted 18 h later in a Beckman scintillation counter. Samples with inhibitors were compared to samples with no inhibitor, and percent inhibition was determined. All samples were corrected for the amount of radiolabel bound to the filters in the absence of tubulin.

**4.2.3. Inhibition of Tubulin Polymerization.** Tubulin polymerization experiments were performed in 0.25 mL reaction mixtures (final volume).<sup>95</sup> The mixtures contained 1 mg/mL (10  $\mu$ M) purified bovine brain tubulin, 0.8 M monosodium glutamate (pH 6.6), 4% (v/v) dimethyl sulfoxide, 0.4 mM GTP, and different compound concentrations. All reaction components except GTP were preincubated for 15 min at 30 °C in 0.24 mL. The mixtures were cooled to 0 °C, and 10  $\mu$ L of 10 mM GTP were added. Reaction mixtures were transferred to cuvettes held at 0 °C in Beckman DU-7400 and DU-7500 spectrophotometers equipped with electronic temperature controllers. The temperature was jumped to 30 °C, taking about 30 s, and polymerization was followed at 350 nm for 20 min. The IC<sub>50</sub> was defined as the compound concentration that inhibited extent of polymerization by 50% after 20 min.

**4.2.4. *In Vivo* Tumor Model.** Human breast cancer cells, MCF7-luc-GFP-mCherry (ATCC), were transfected sequentially with a lentivirus containing firefly luciferase reporter, GFP and mCherry reporter genes, as described previously.<sup>78</sup> Highly expressing

stable clones were isolated. Induction of tumors was carried out by injecting  $10^6$  cells mixed with 50% Matrigel<sup>TM</sup> (BD Biosciences, San Jose, CA) into the right upper ventral mammary fat pads of female SCID-NOD mice (UTSW breeding colony). Tumors were allowed to grow to a size of 10-12 mm in diameter, determined by calipers, before selection for BLI. All animal procedures were approved by the University of Texas Southwestern Medical Center Institutional Animal Care and Use Committee.

**4.2.5. *In Vivo* Bioluminescence Imaging (BLI).** BLI was carried out as described previously.<sup>78</sup> Briefly, anesthetized, tumor bearing mice (O<sub>2</sub>, 2% isoflurane, Henry Schein Inc., Melville, NY) were injected subcutaneously in the fore-back neck region with 80  $\mu$ L of a solution of luciferase substrate, *D*-luciferin (sodium salt, 120 mg/kg, in saline, Gold Biotechnology, St. Louis, MO). Mice were maintained under anesthesia (2% isoflurane in oxygen, 1 dm<sup>3</sup>/min) while baseline BLI was performed using a Caliper Xenogen IVIS<sup>®</sup> Spectrum (Perkin-Elmer, Alameda, CA). A series of BLI images was collected over 35 min using the following settings: auto exposure time, f-stop = 2, Field of view = D, binning = 4 (medium). Light intensity-time curves obtained from these images were analyzed using Living Image<sup>®</sup> software and light emission compared based on area under the light emission curve. Mice were injected intraperitoneally with either 120  $\mu$ L of saline (vehicle), **CA4P** (provided by Mateon Therapeutics, Inc.; 120 mg/kg in saline as used previously<sup>54</sup> or analogue **24** (120 mg/kg) in saline immediately after baseline BLI. BLI was repeated, with new luciferin injections, 4, 24, and 48 h later.

**4.2.6. Histology.** Following the 48 h BLI data acquisition, the tumors were excised, bisected and fixed in 4% paraformaldehyde solution. Tumor tissue was processed for paraffin embedding, sectioned and stained by routine methods. H&E staining was



performed on one cross section from each tumor. Whole mount high resolution microscopy was obtained using a Zeiss Axioscan Z1 digital slide scanner.

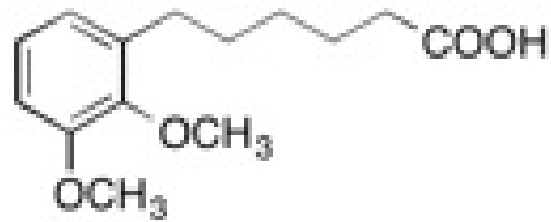

**3**

11.830

7.027  
7.008  
6.989  
6.812  
6.792

3.879  
3.858

2.694  
2.676  
2.656  
2.411  
2.393  
2.374  
1.760  
1.742  
1.724  
1.704  
1.683  
1.662  
1.644  
1.625  
1.492  
1.474  
1.455  
1.437  
1.418

0.798

1

2

**S26**

2.85

3.01

1.77

1.77

4.02

1.94

ppm 15 14 13 12 11 10 9 8 7 6 5 4 3 2 1 0 -1 -2 -3

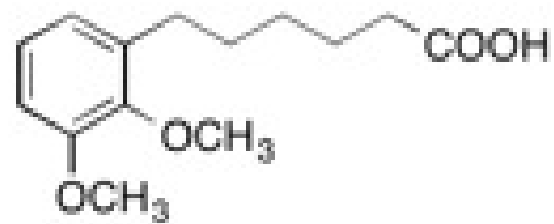

**3**

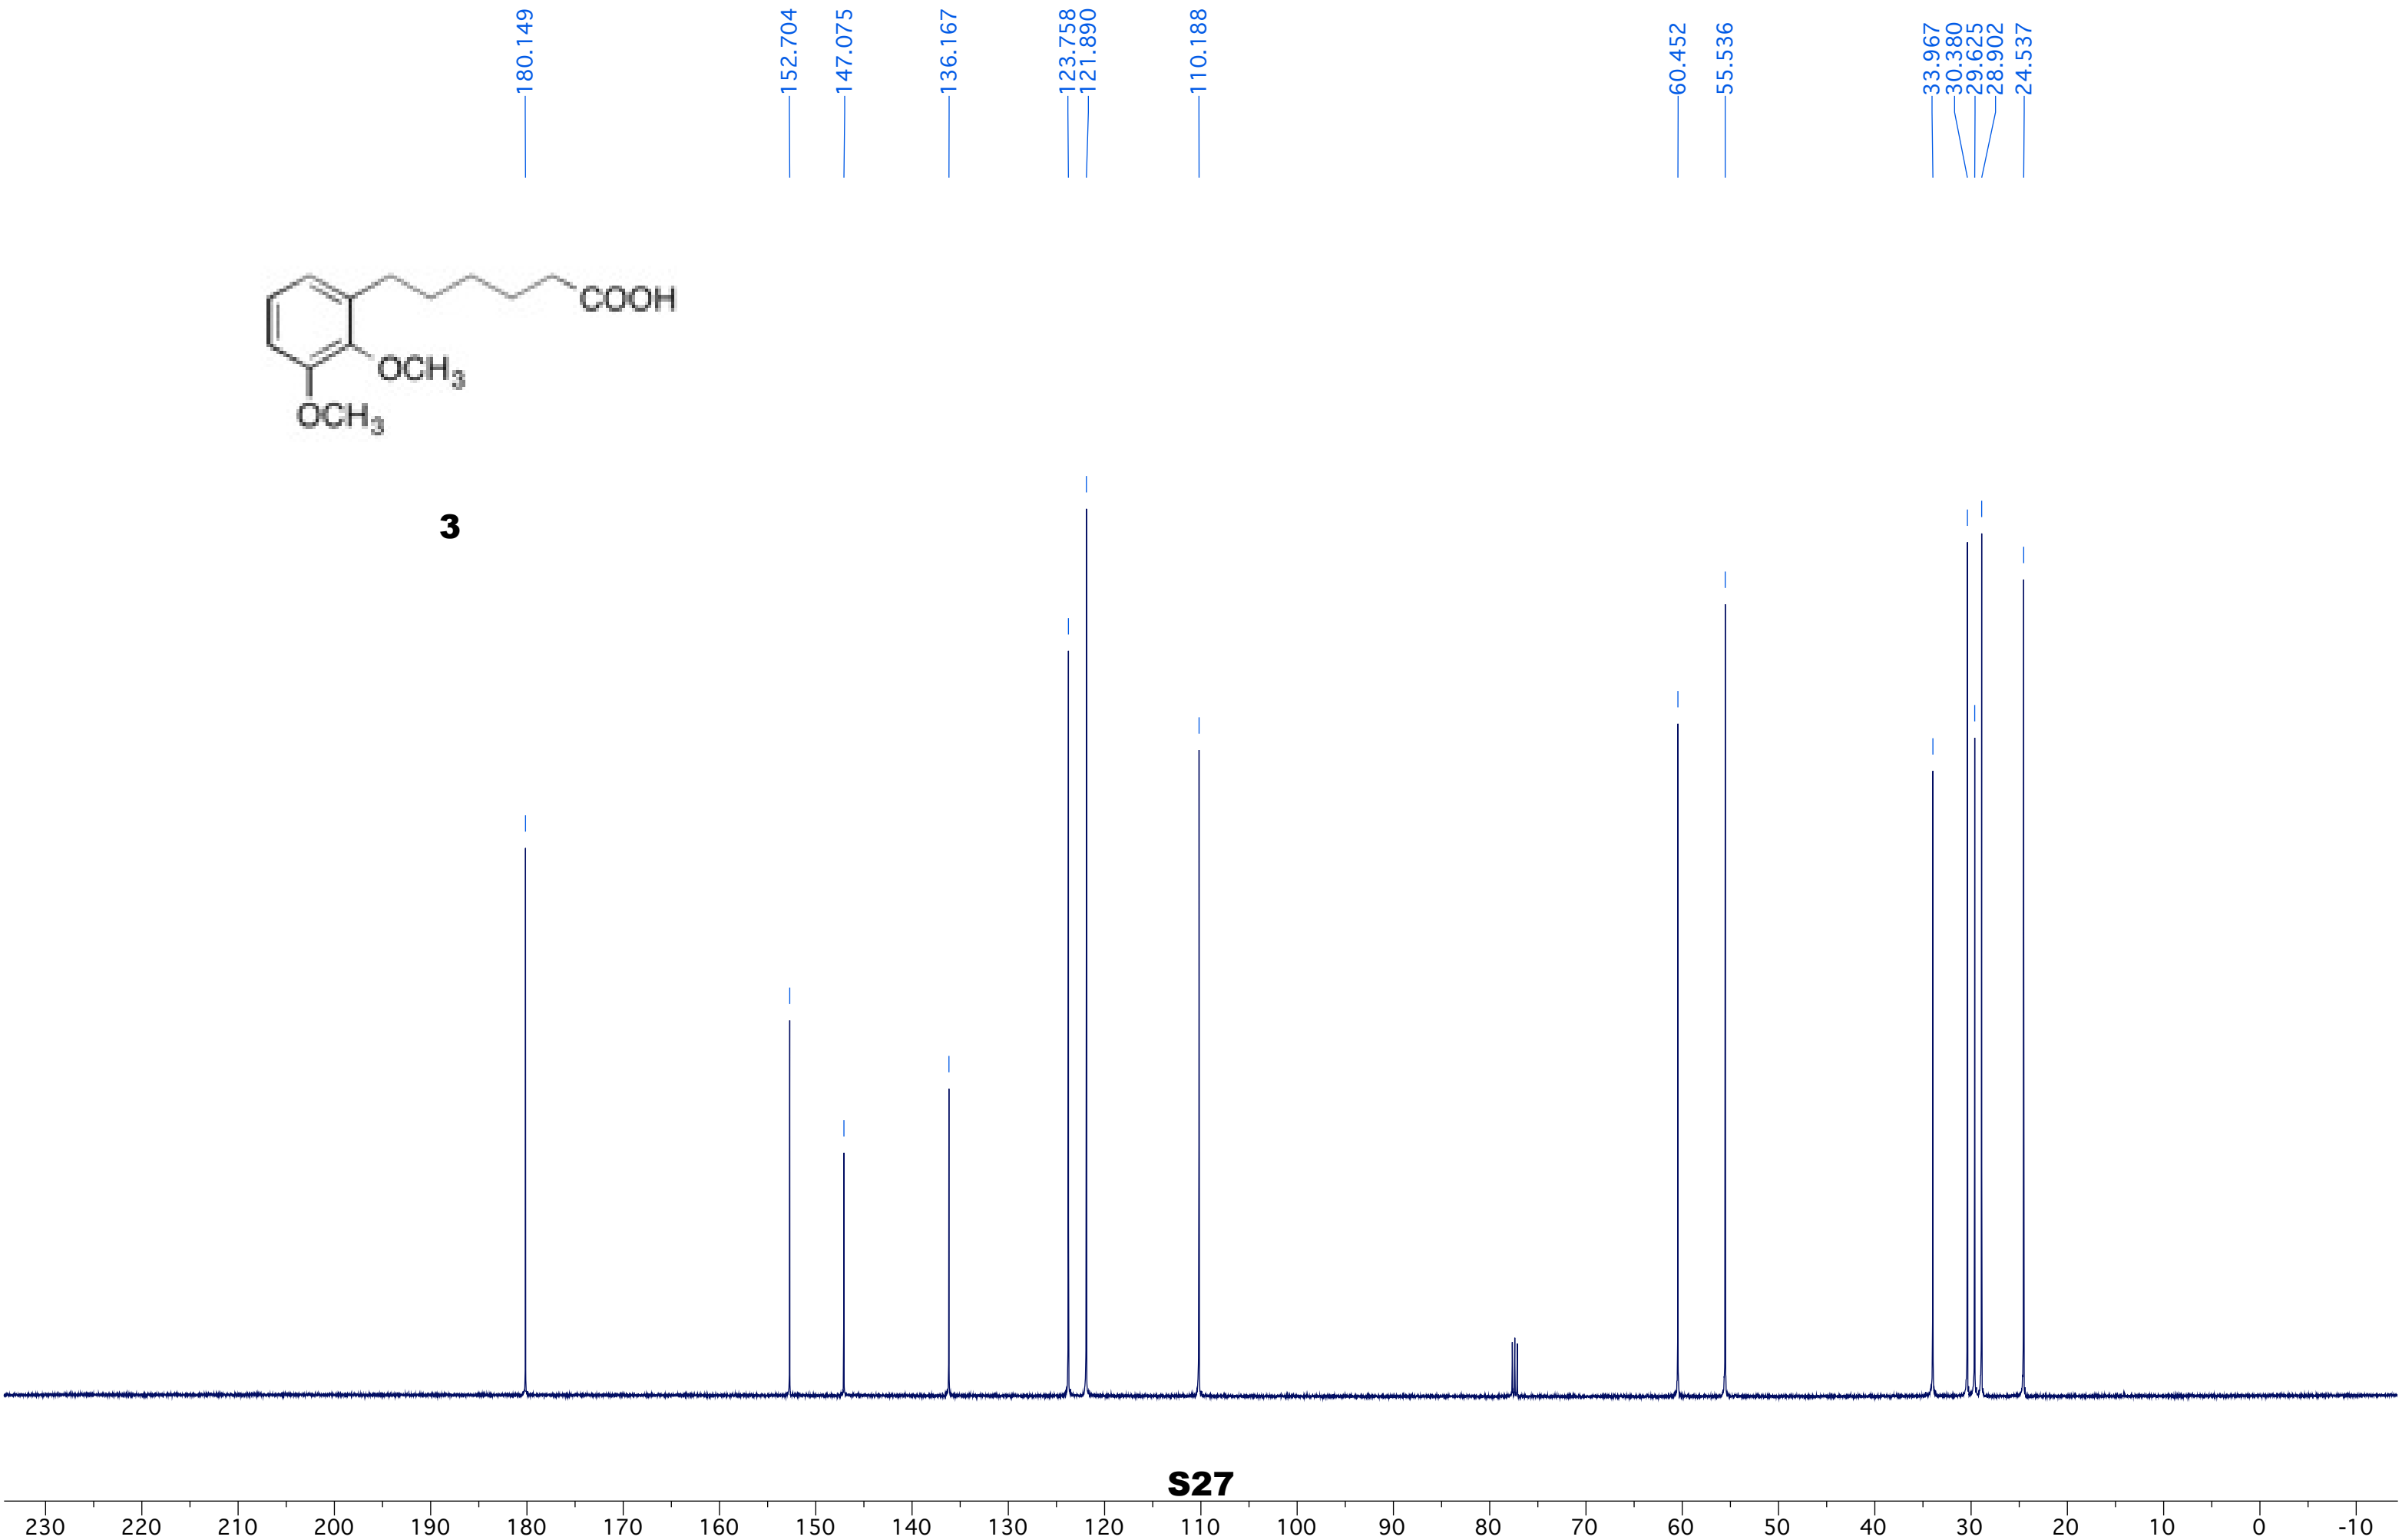

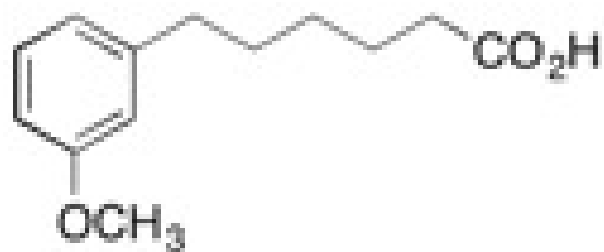

**4**

7.229  
7.212  
7.196  
6.799  
6.783  
6.756

3.813

2.630  
2.615  
2.599  
2.390  
2.375  
2.360  
2.191  
2.119  
1.724  
1.709  
1.694  
1.679  
1.664  
1.633  
1.444  
1.428  
1.413  
1.397  
1.383

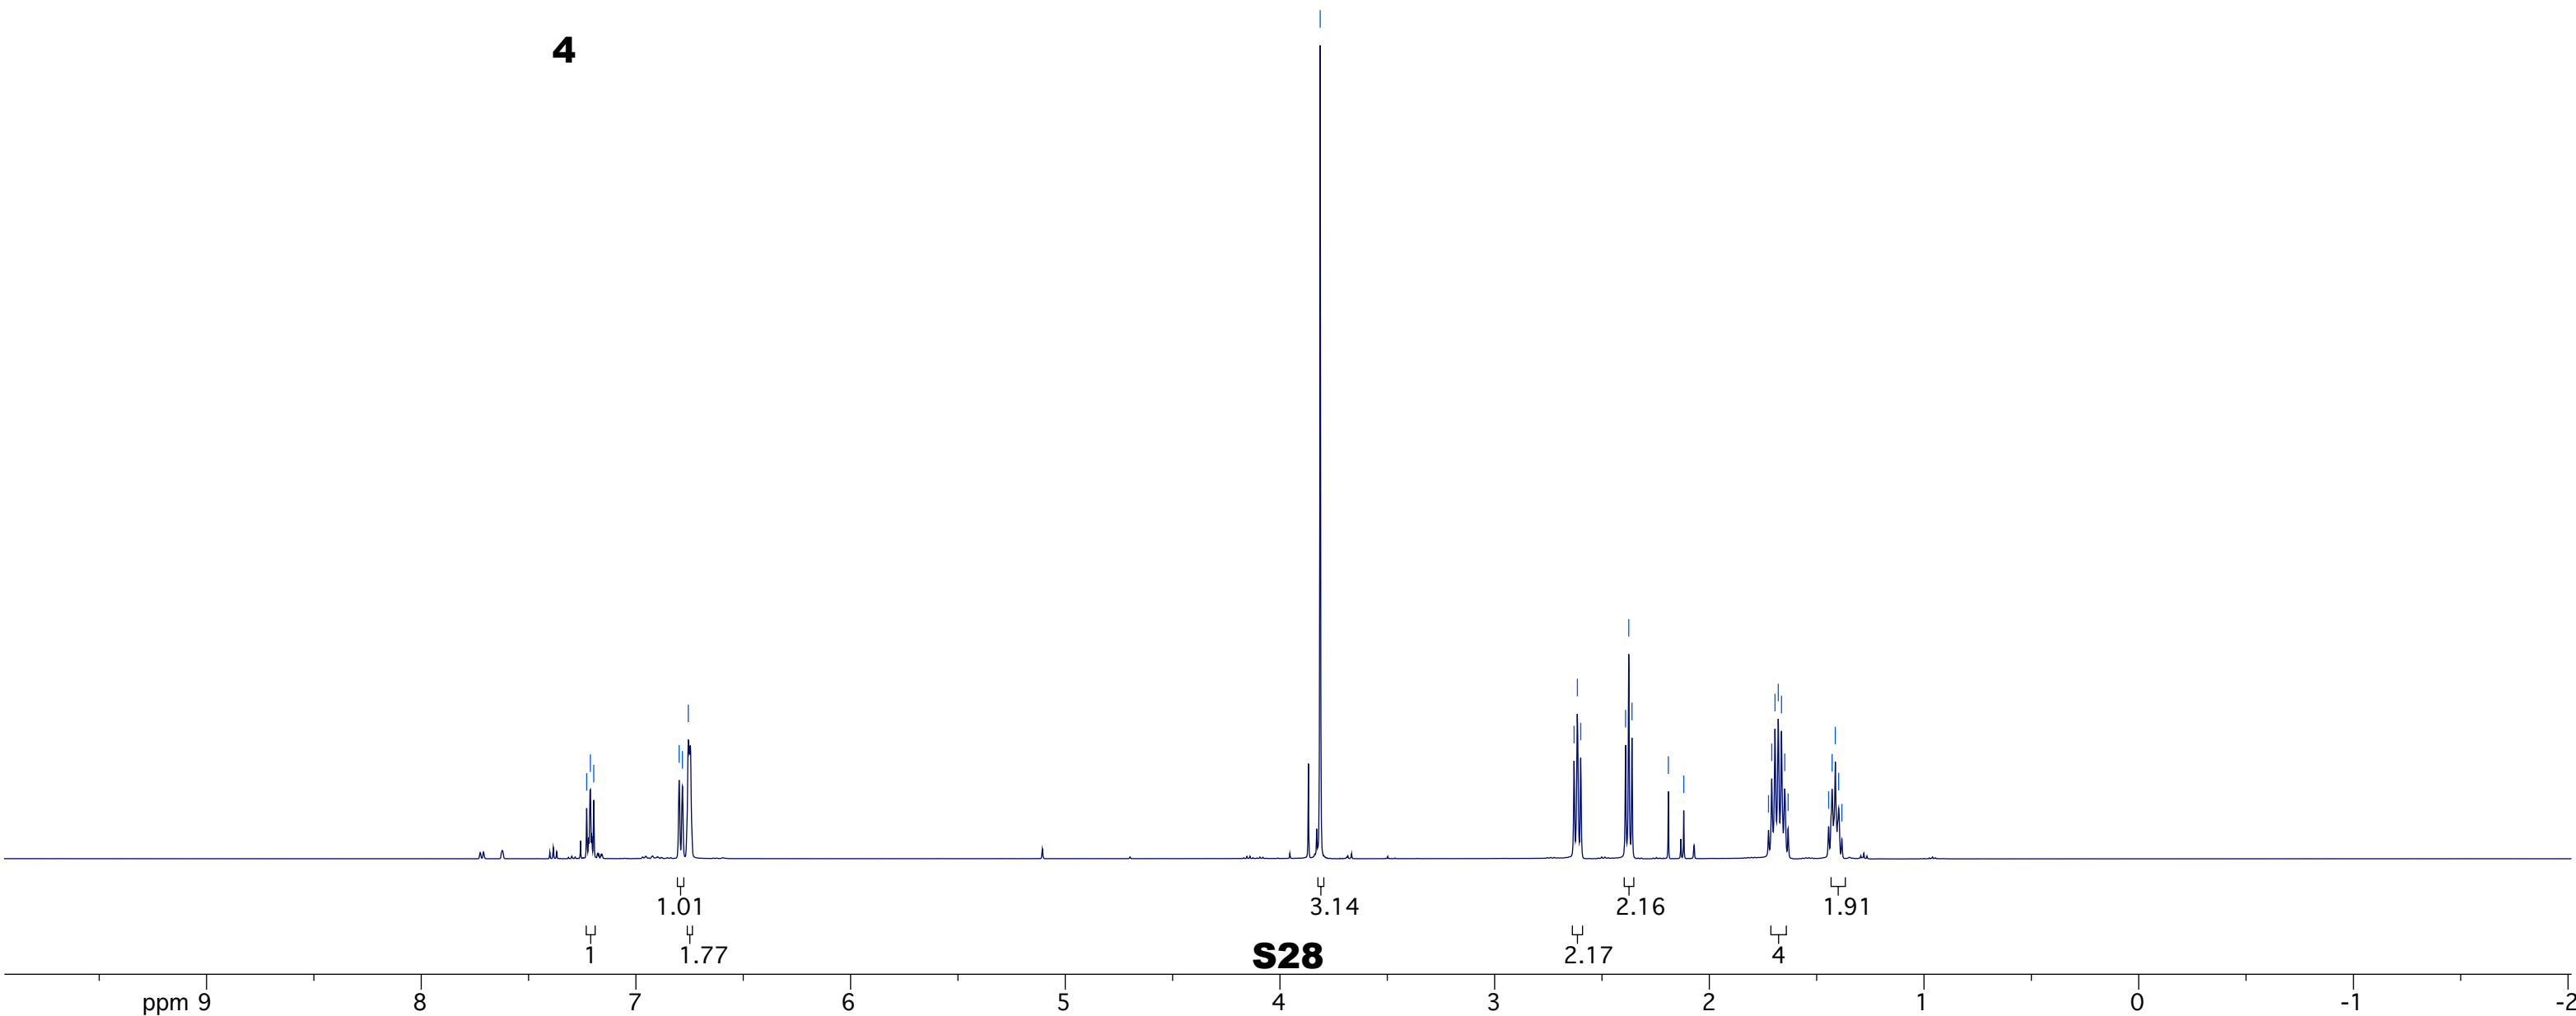

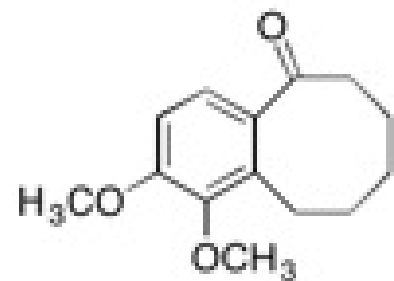

**5**

7.362  
7.348  
6.659  
6.644  
3.904  
3.892  
3.692  
3.592  
2.947  
2.936  
2.925  
2.741  
2.730  
2.718  
1.822  
1.630  
1.619  
1.609  
1.602  
1.598  
1.592  
1.587  
1.581  
1.571  
1.560  
1.290  
1.279  
1.270  
1.264  
1.250  
1.054  
1.042  
1.031

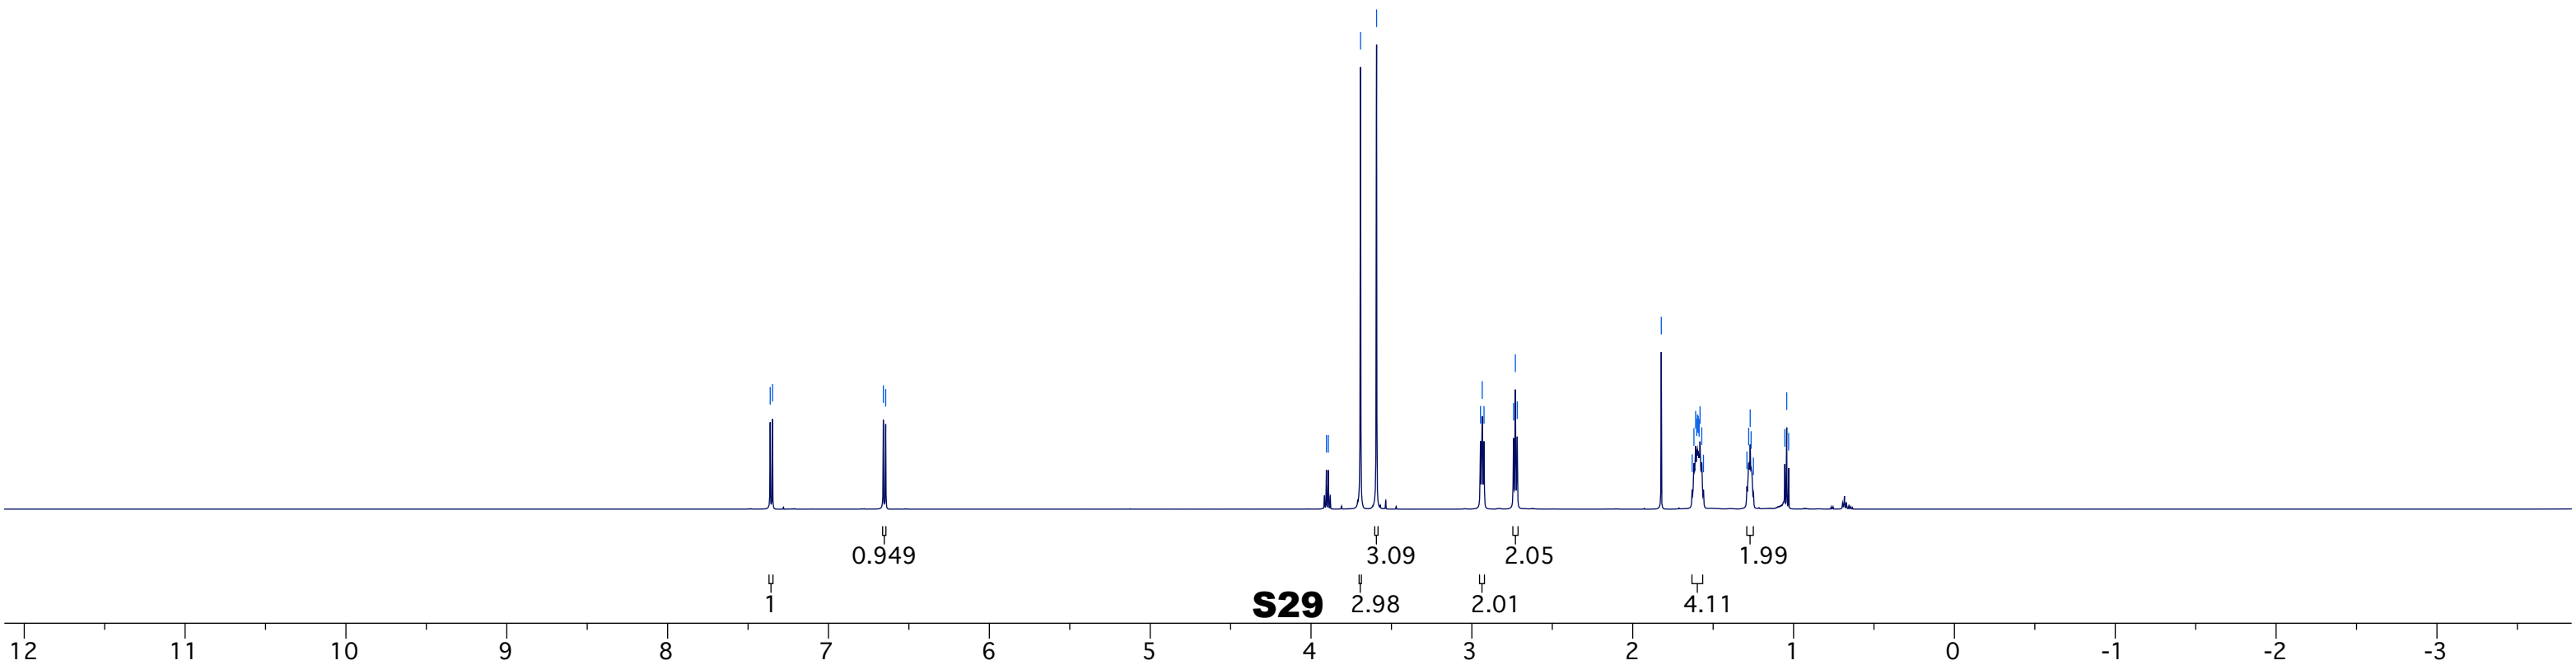

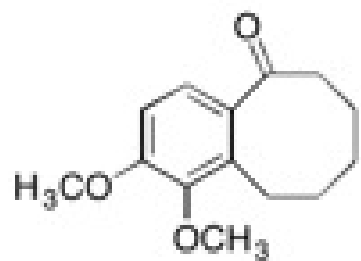

**5**

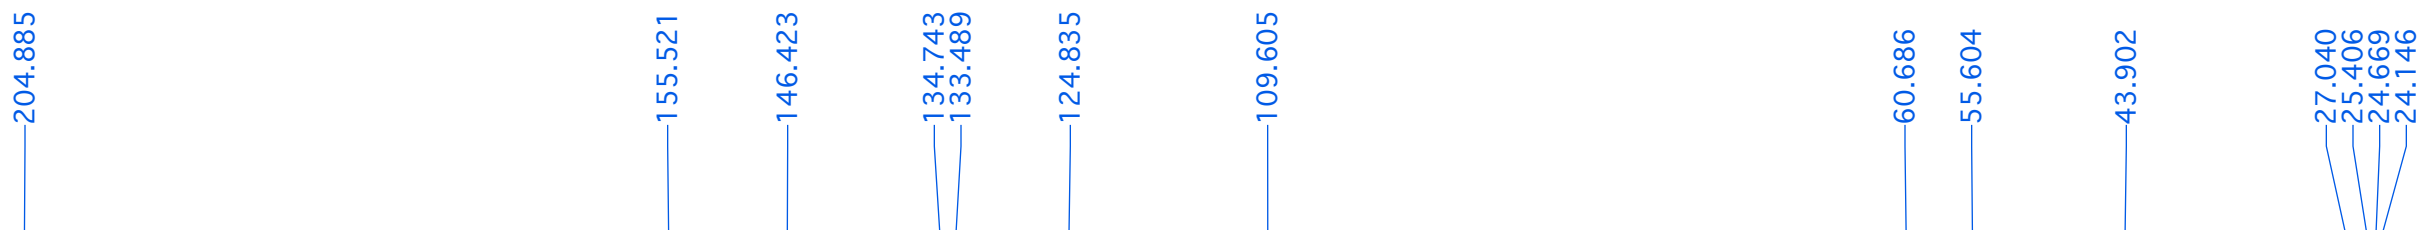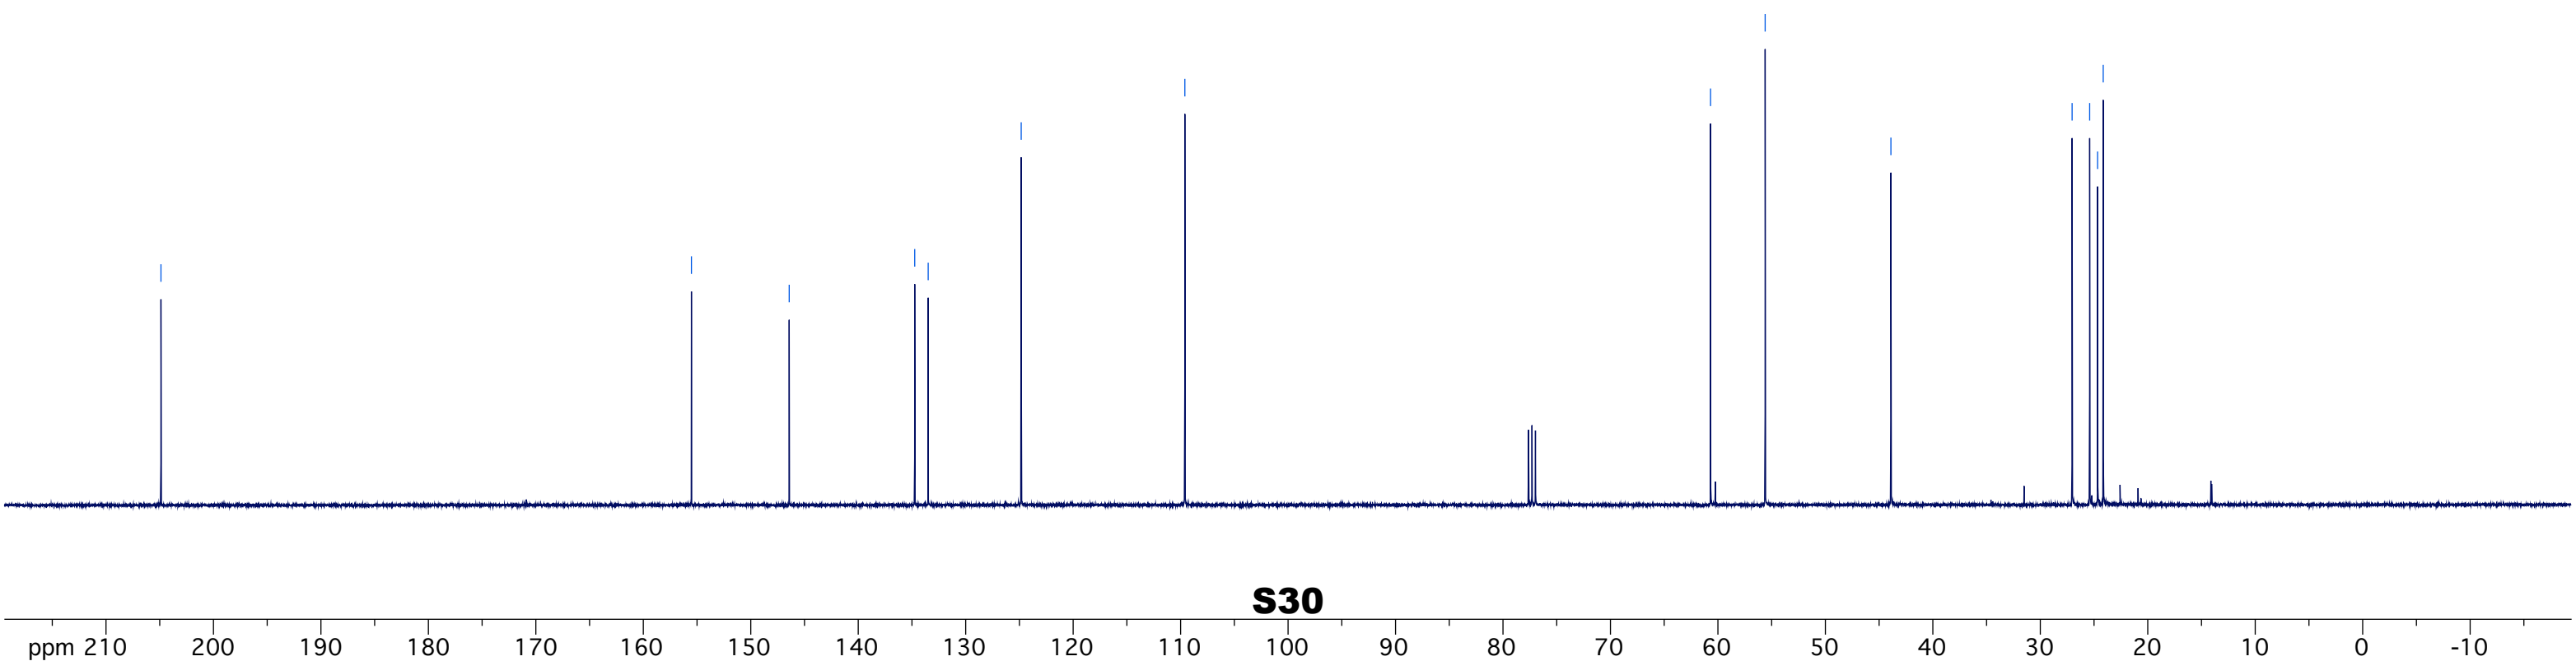

**S30**

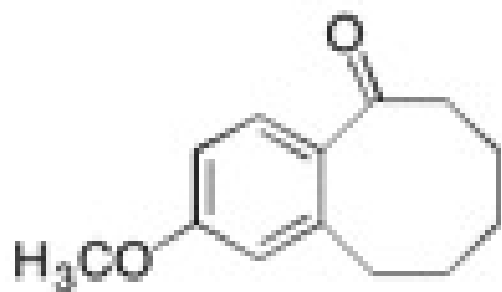

**6**

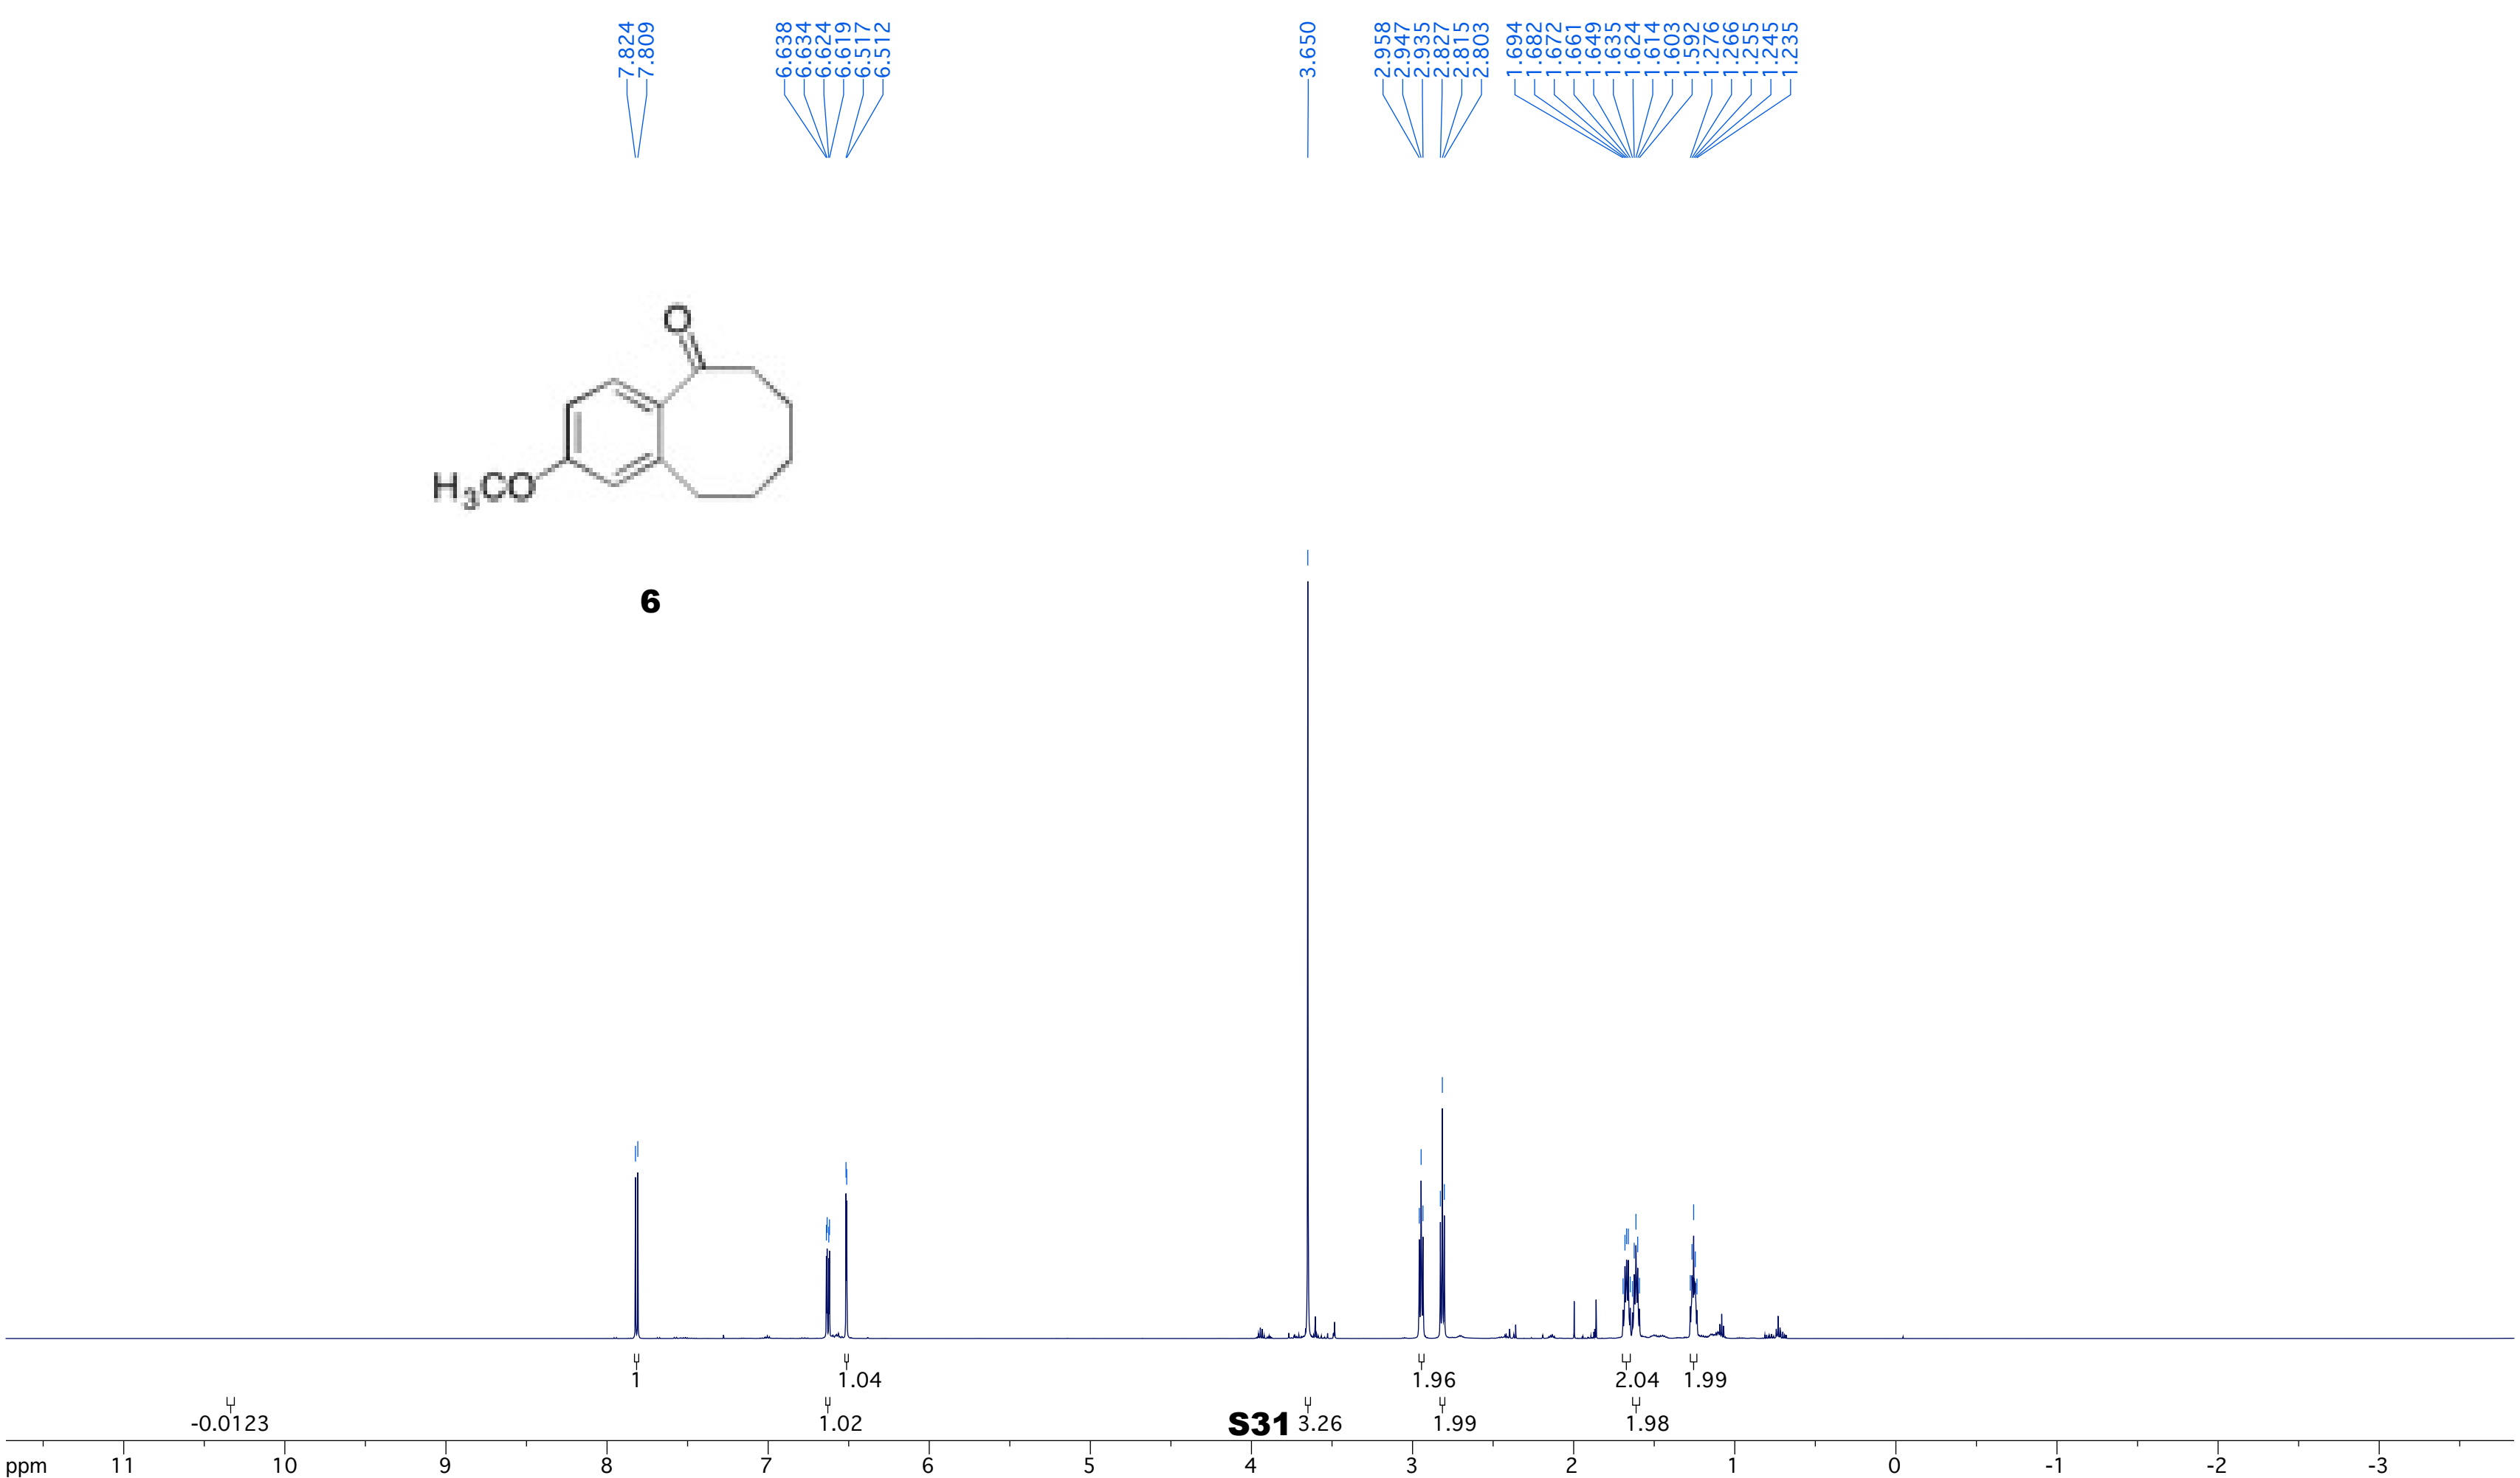

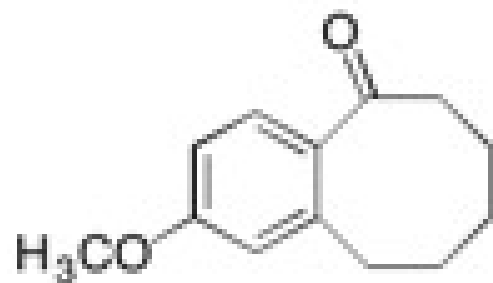

**6**

202.376  
162.760  
143.089  
132.227  
131.383  
116.503  
111.494  
55.087  
42.599  
35.294  
27.640  
24.480  
22.976

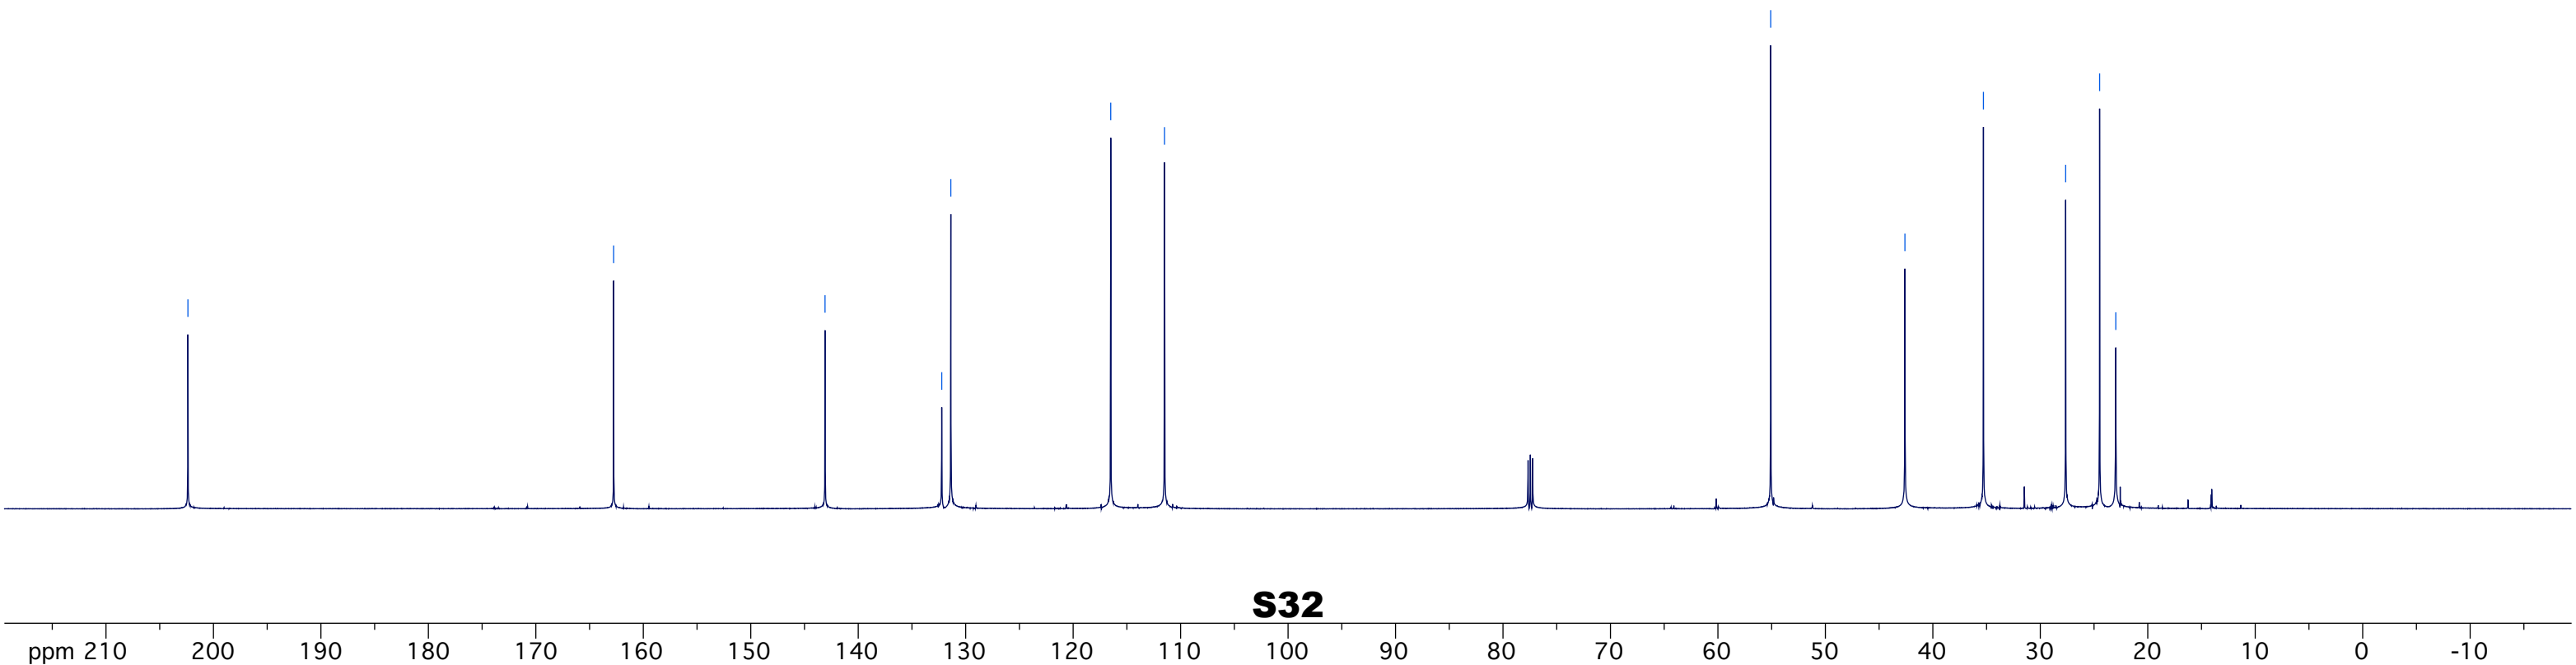

**S32**



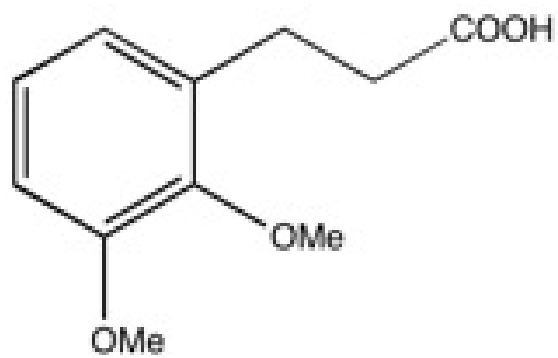

**9**

11.911

6.981  
6.965  
6.950  
6.794  
6.778

3.846  
3.801

2.995  
2.980  
2.964  
2.689  
2.672  
2.657

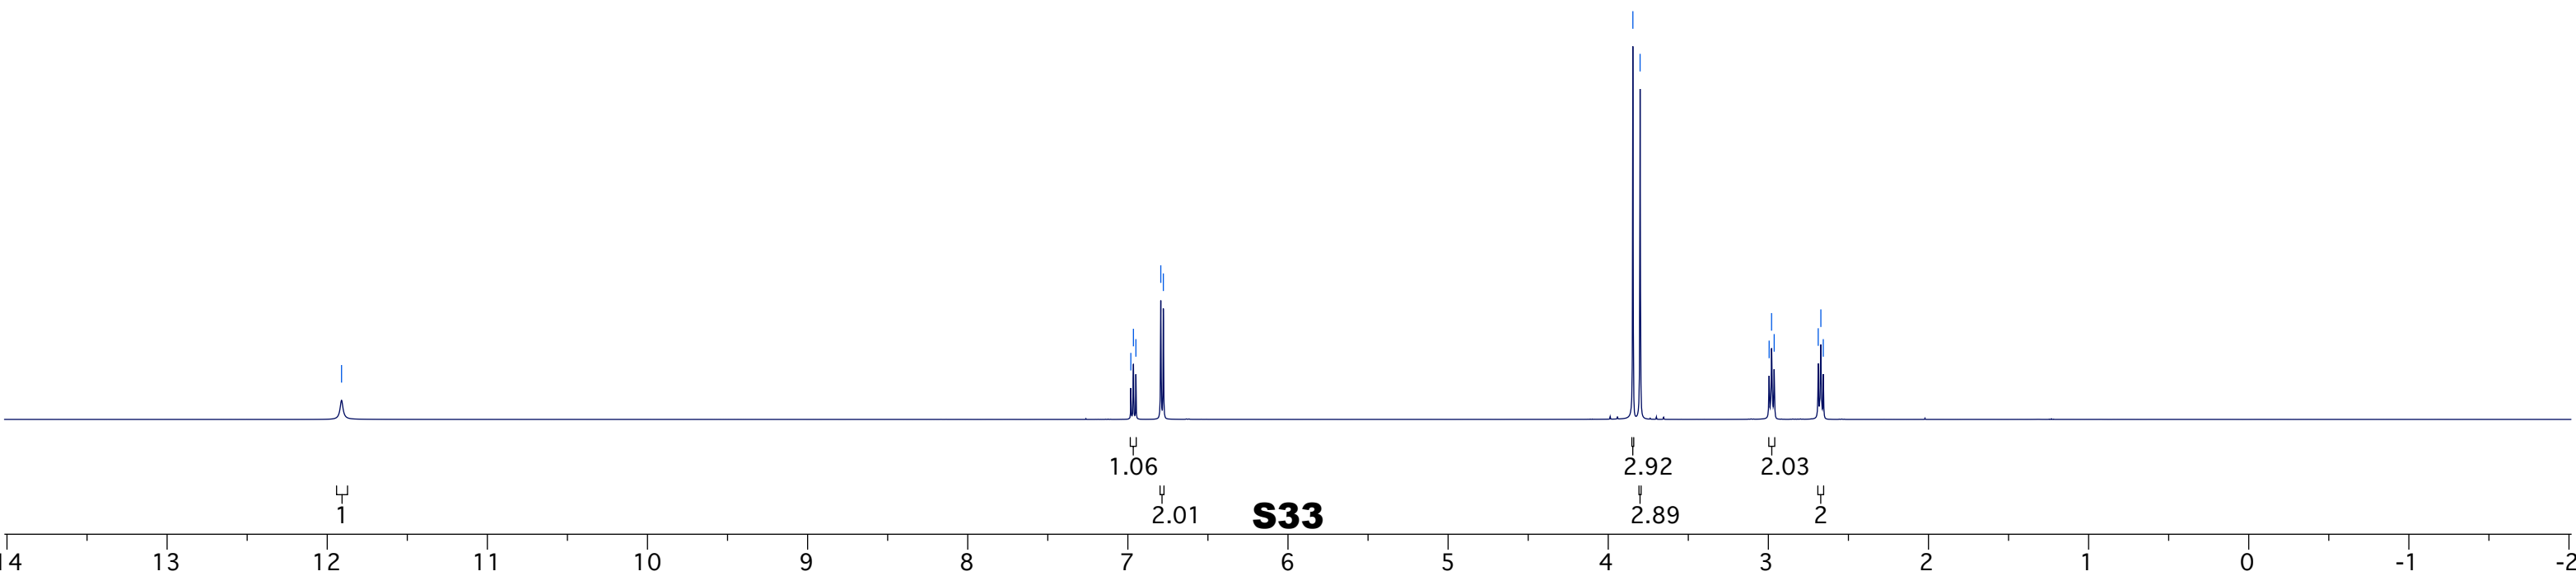

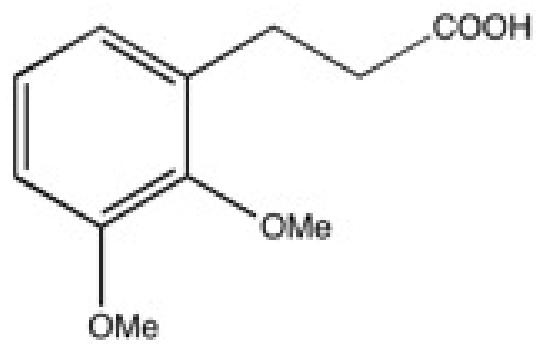

**9**

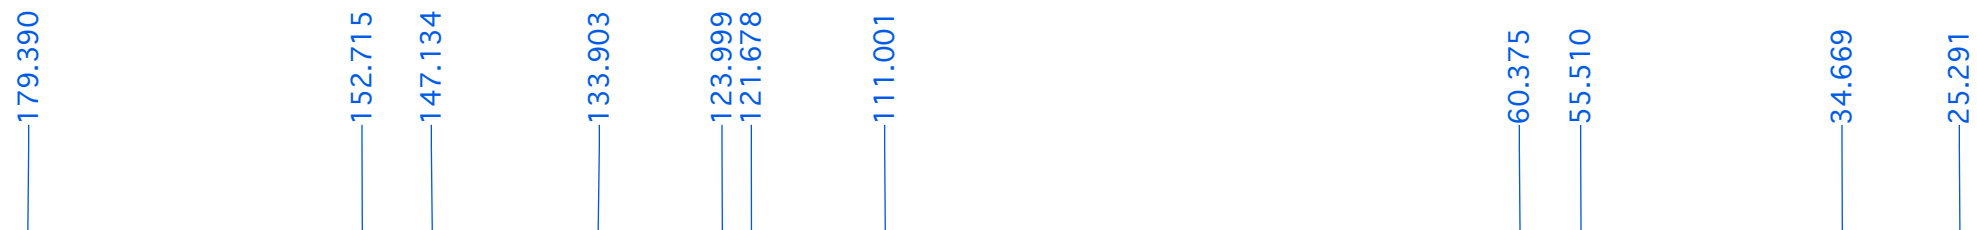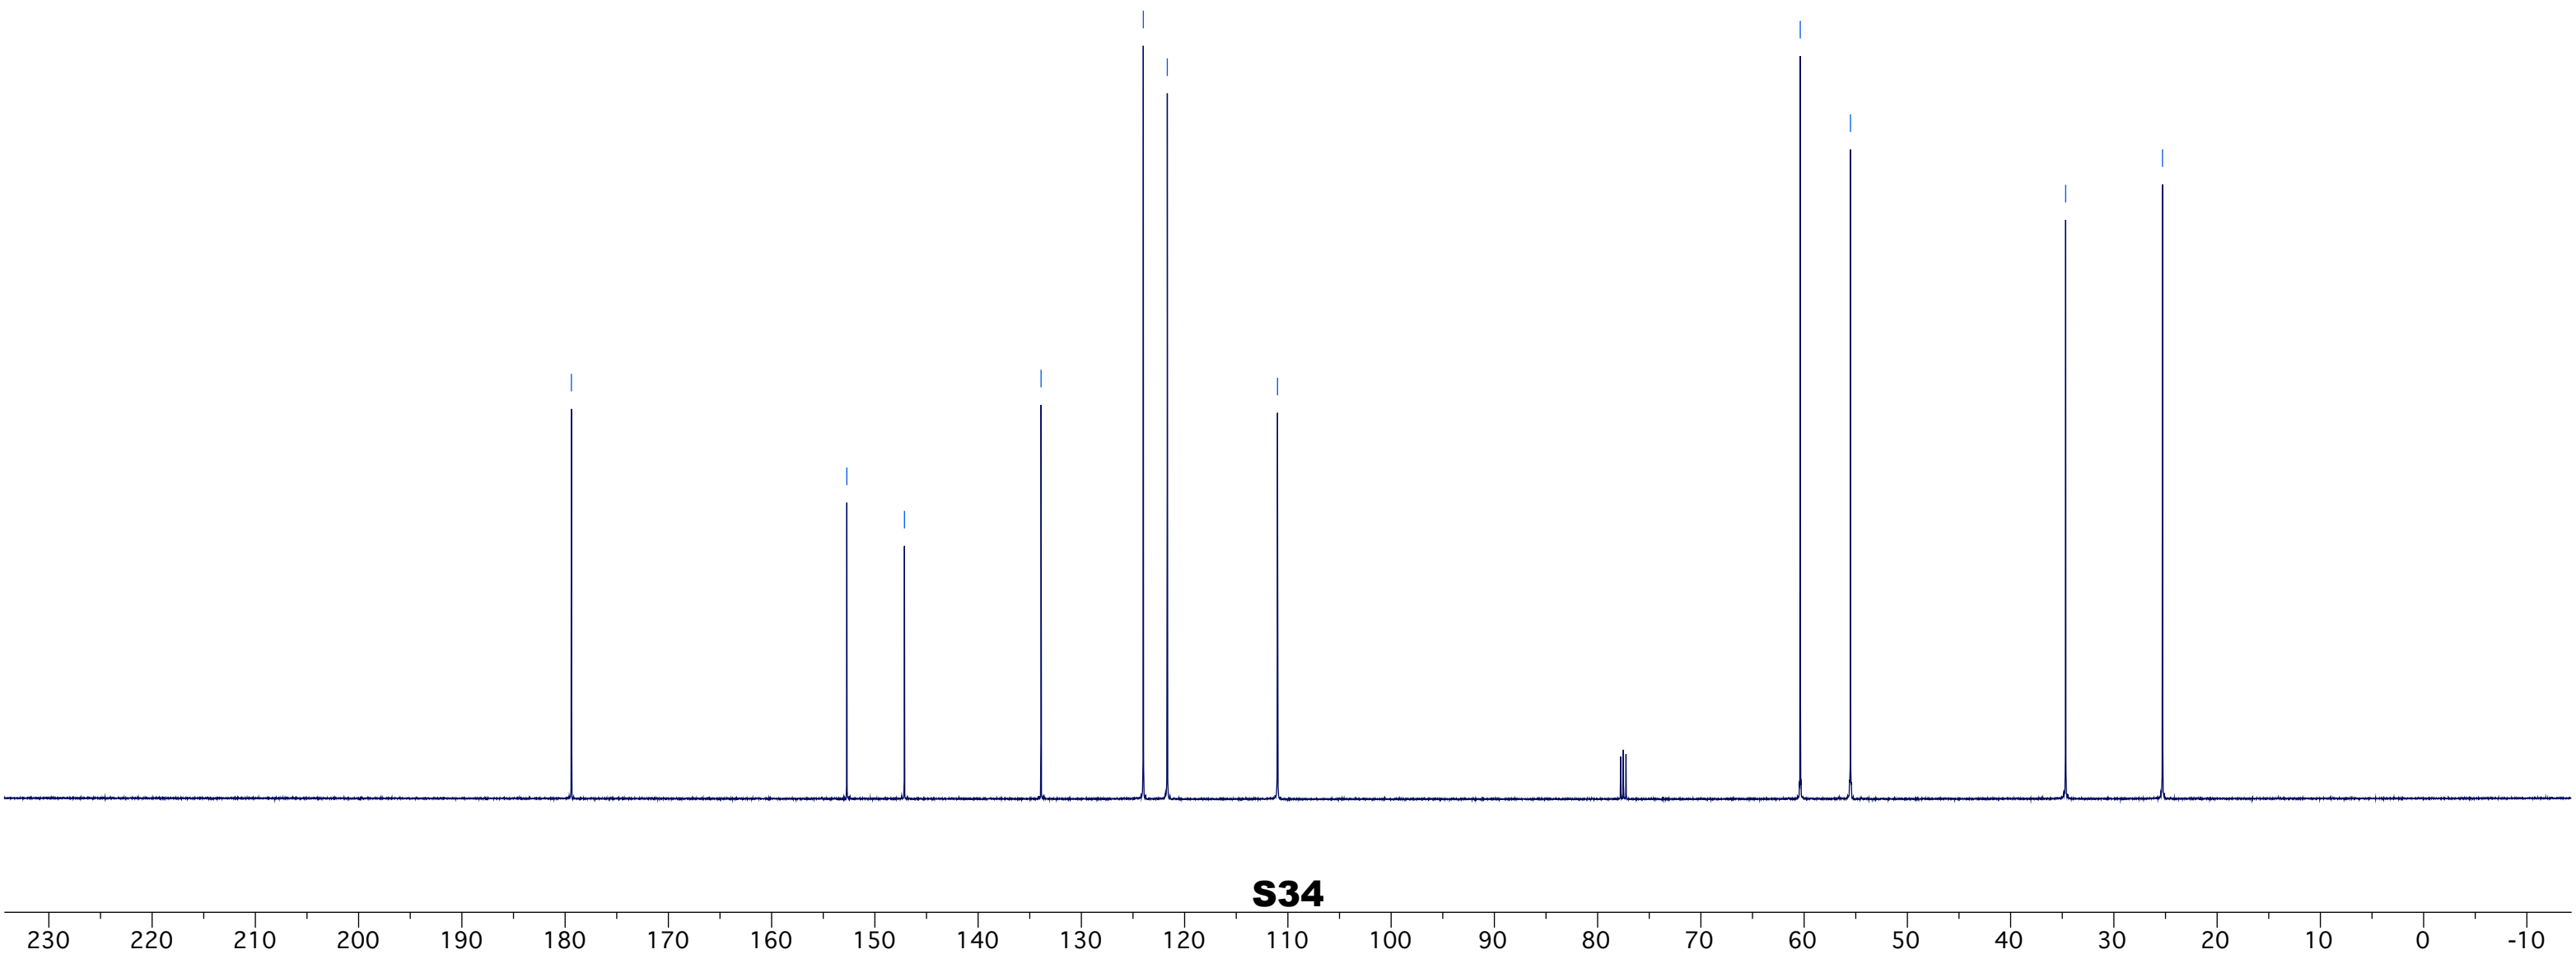

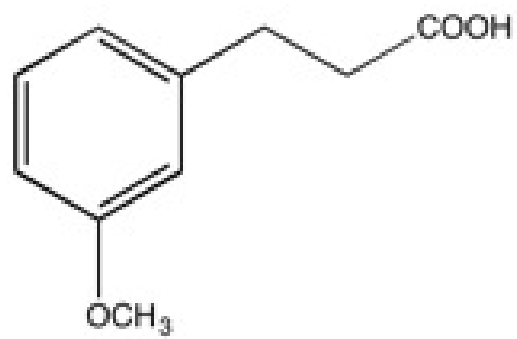

**10**

11.931

7.288  
7.273  
7.257  
6.876  
6.844  
6.828

3.005  
2.992  
2.977  
2.744  
2.731  
2.710

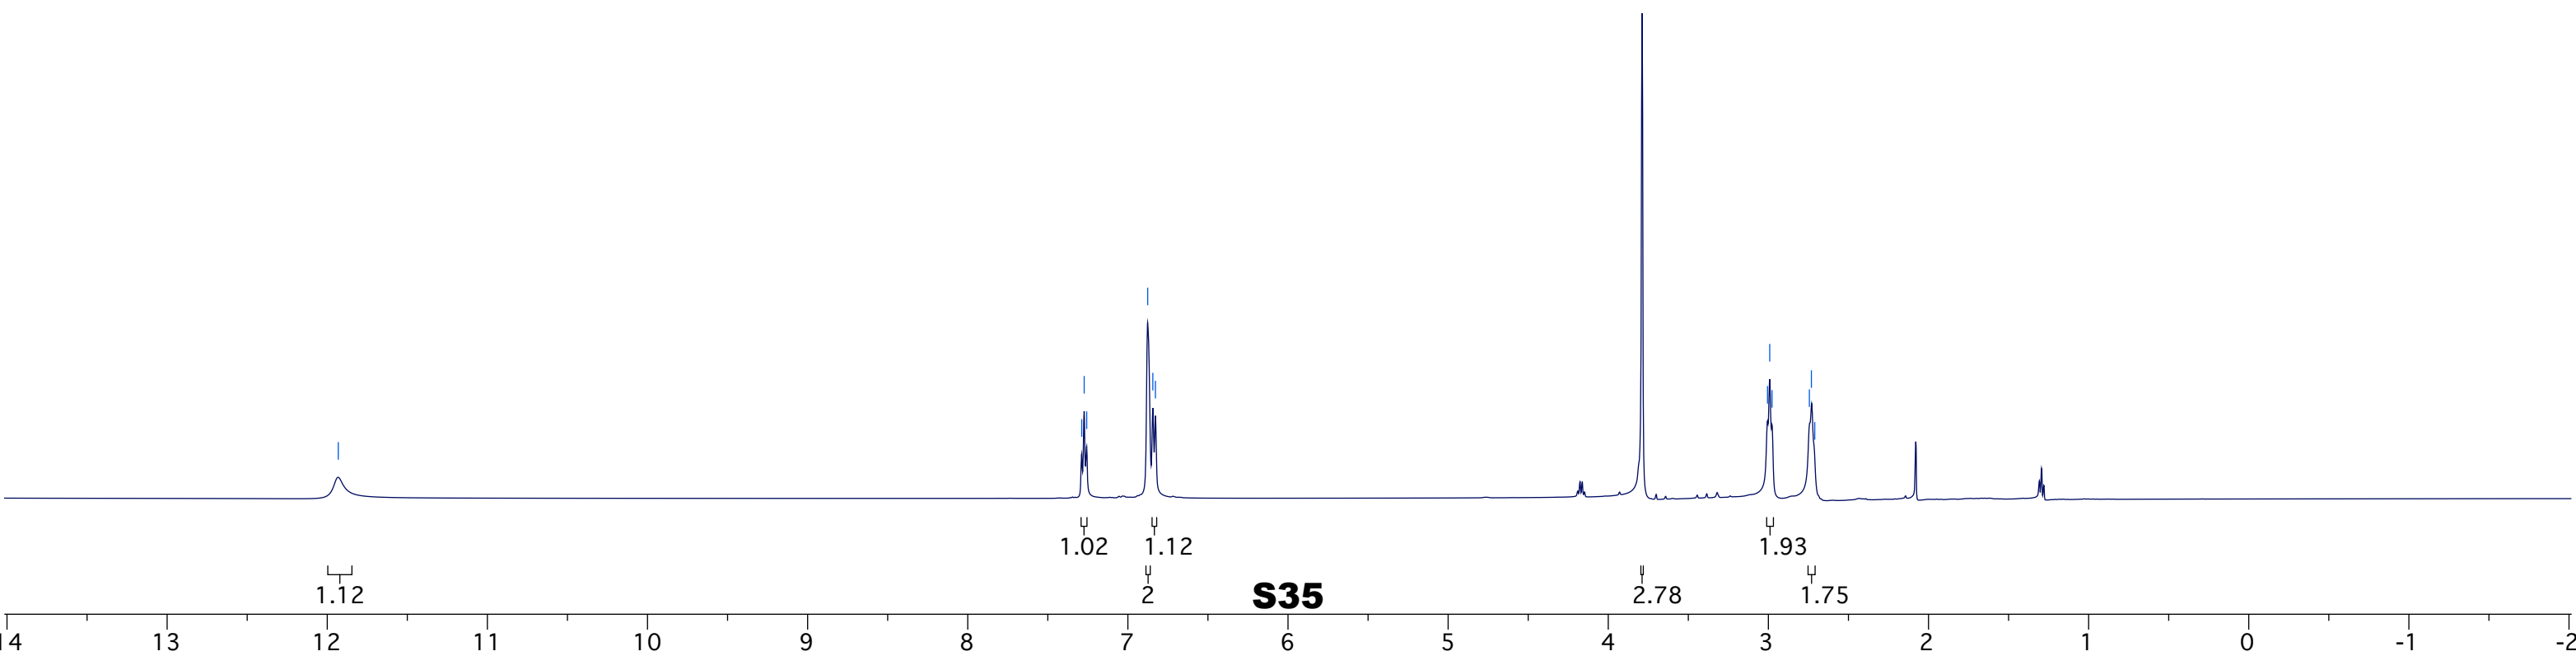

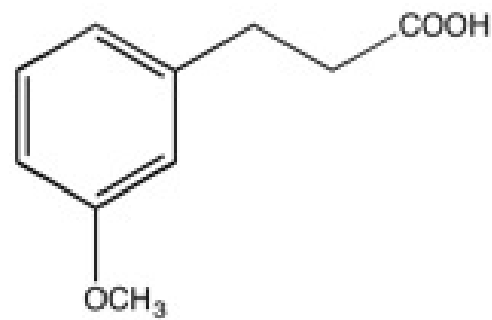

**10**

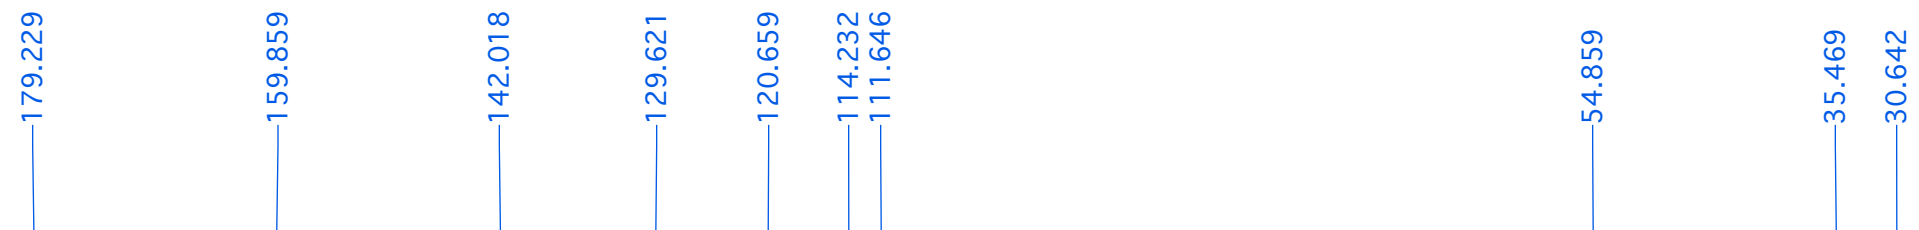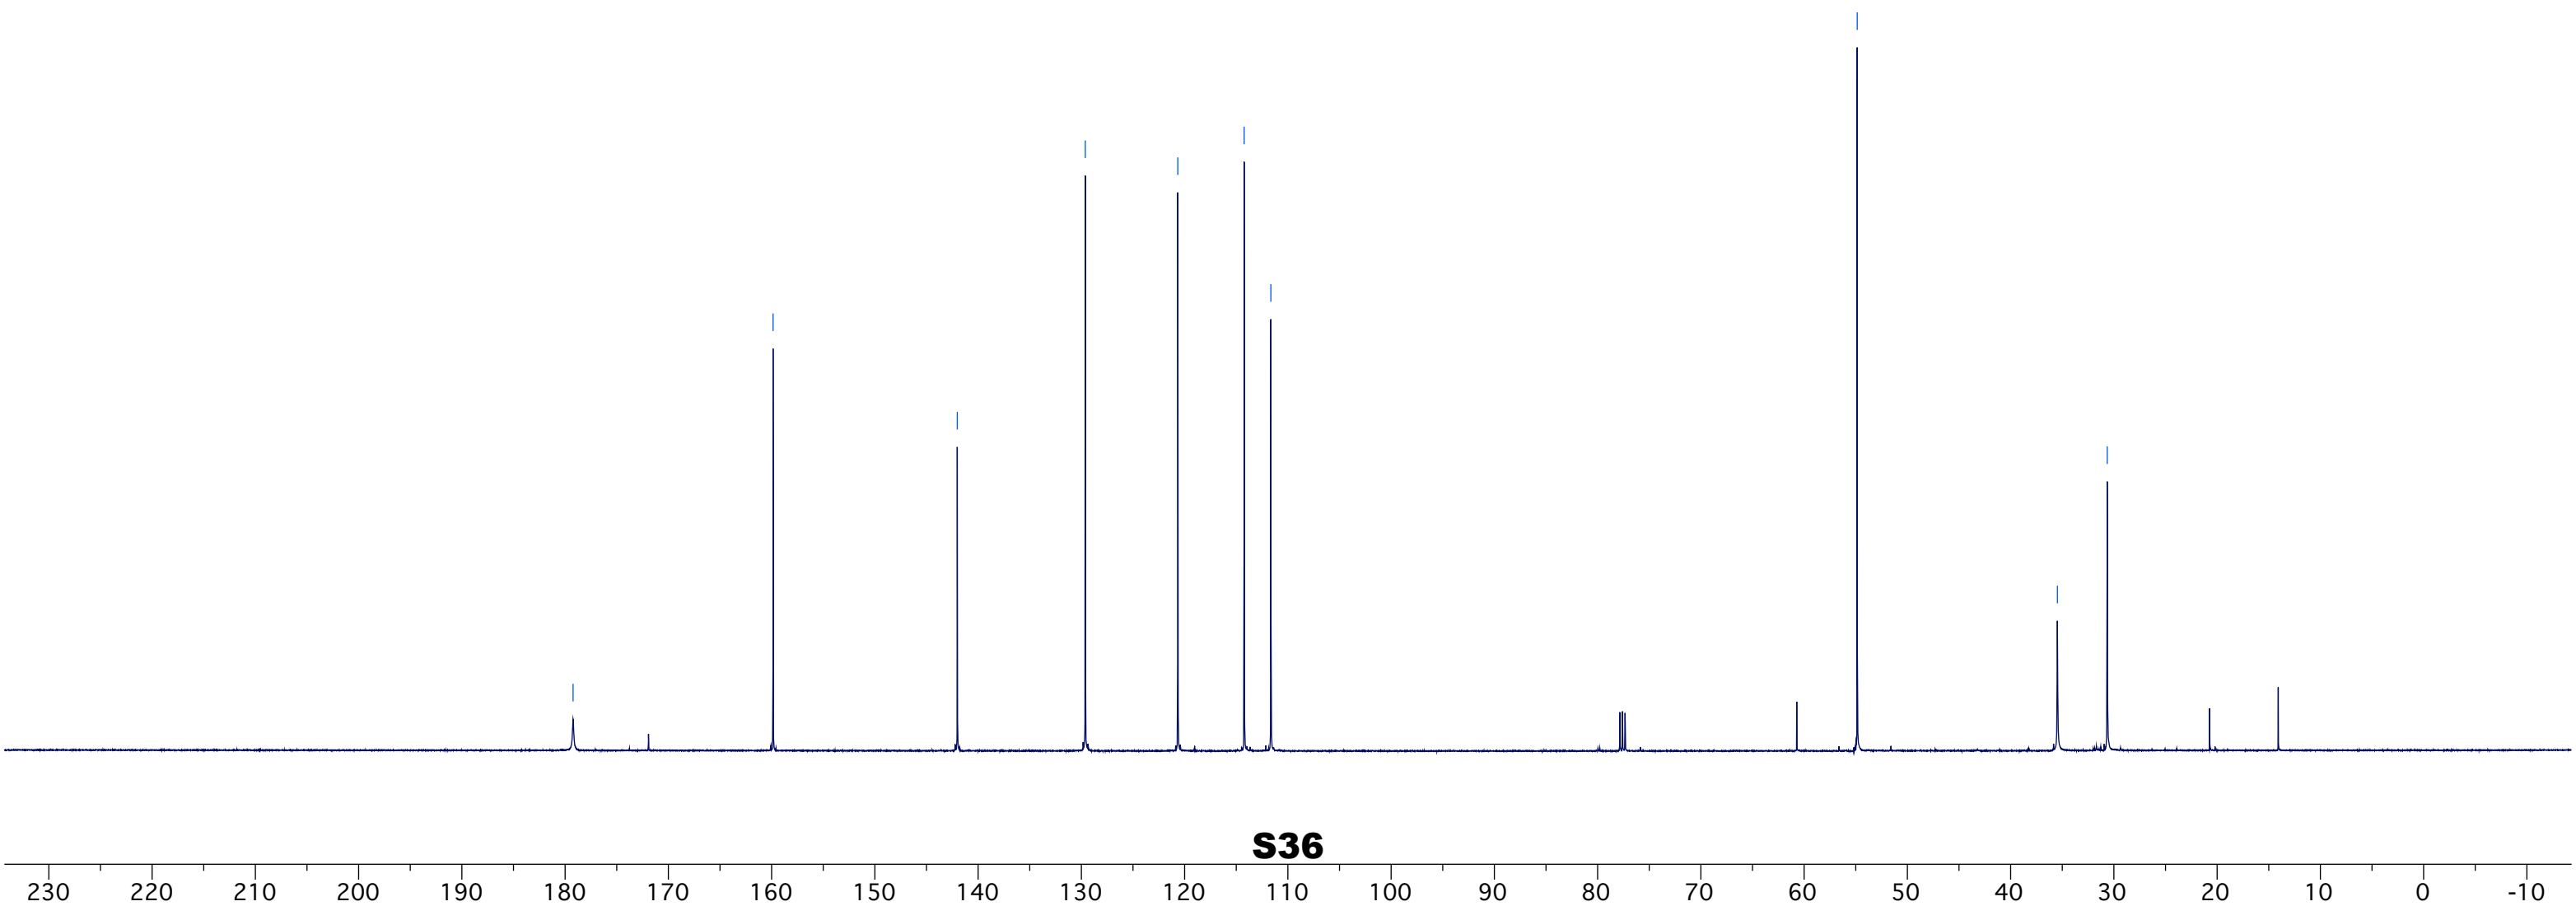

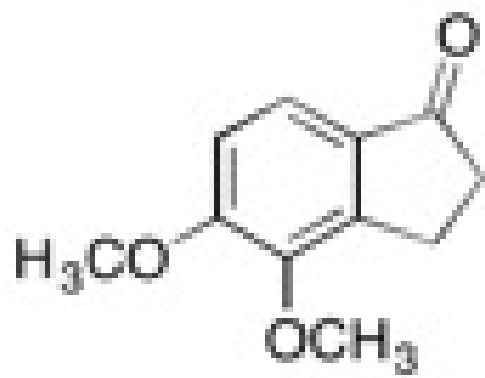

**11**

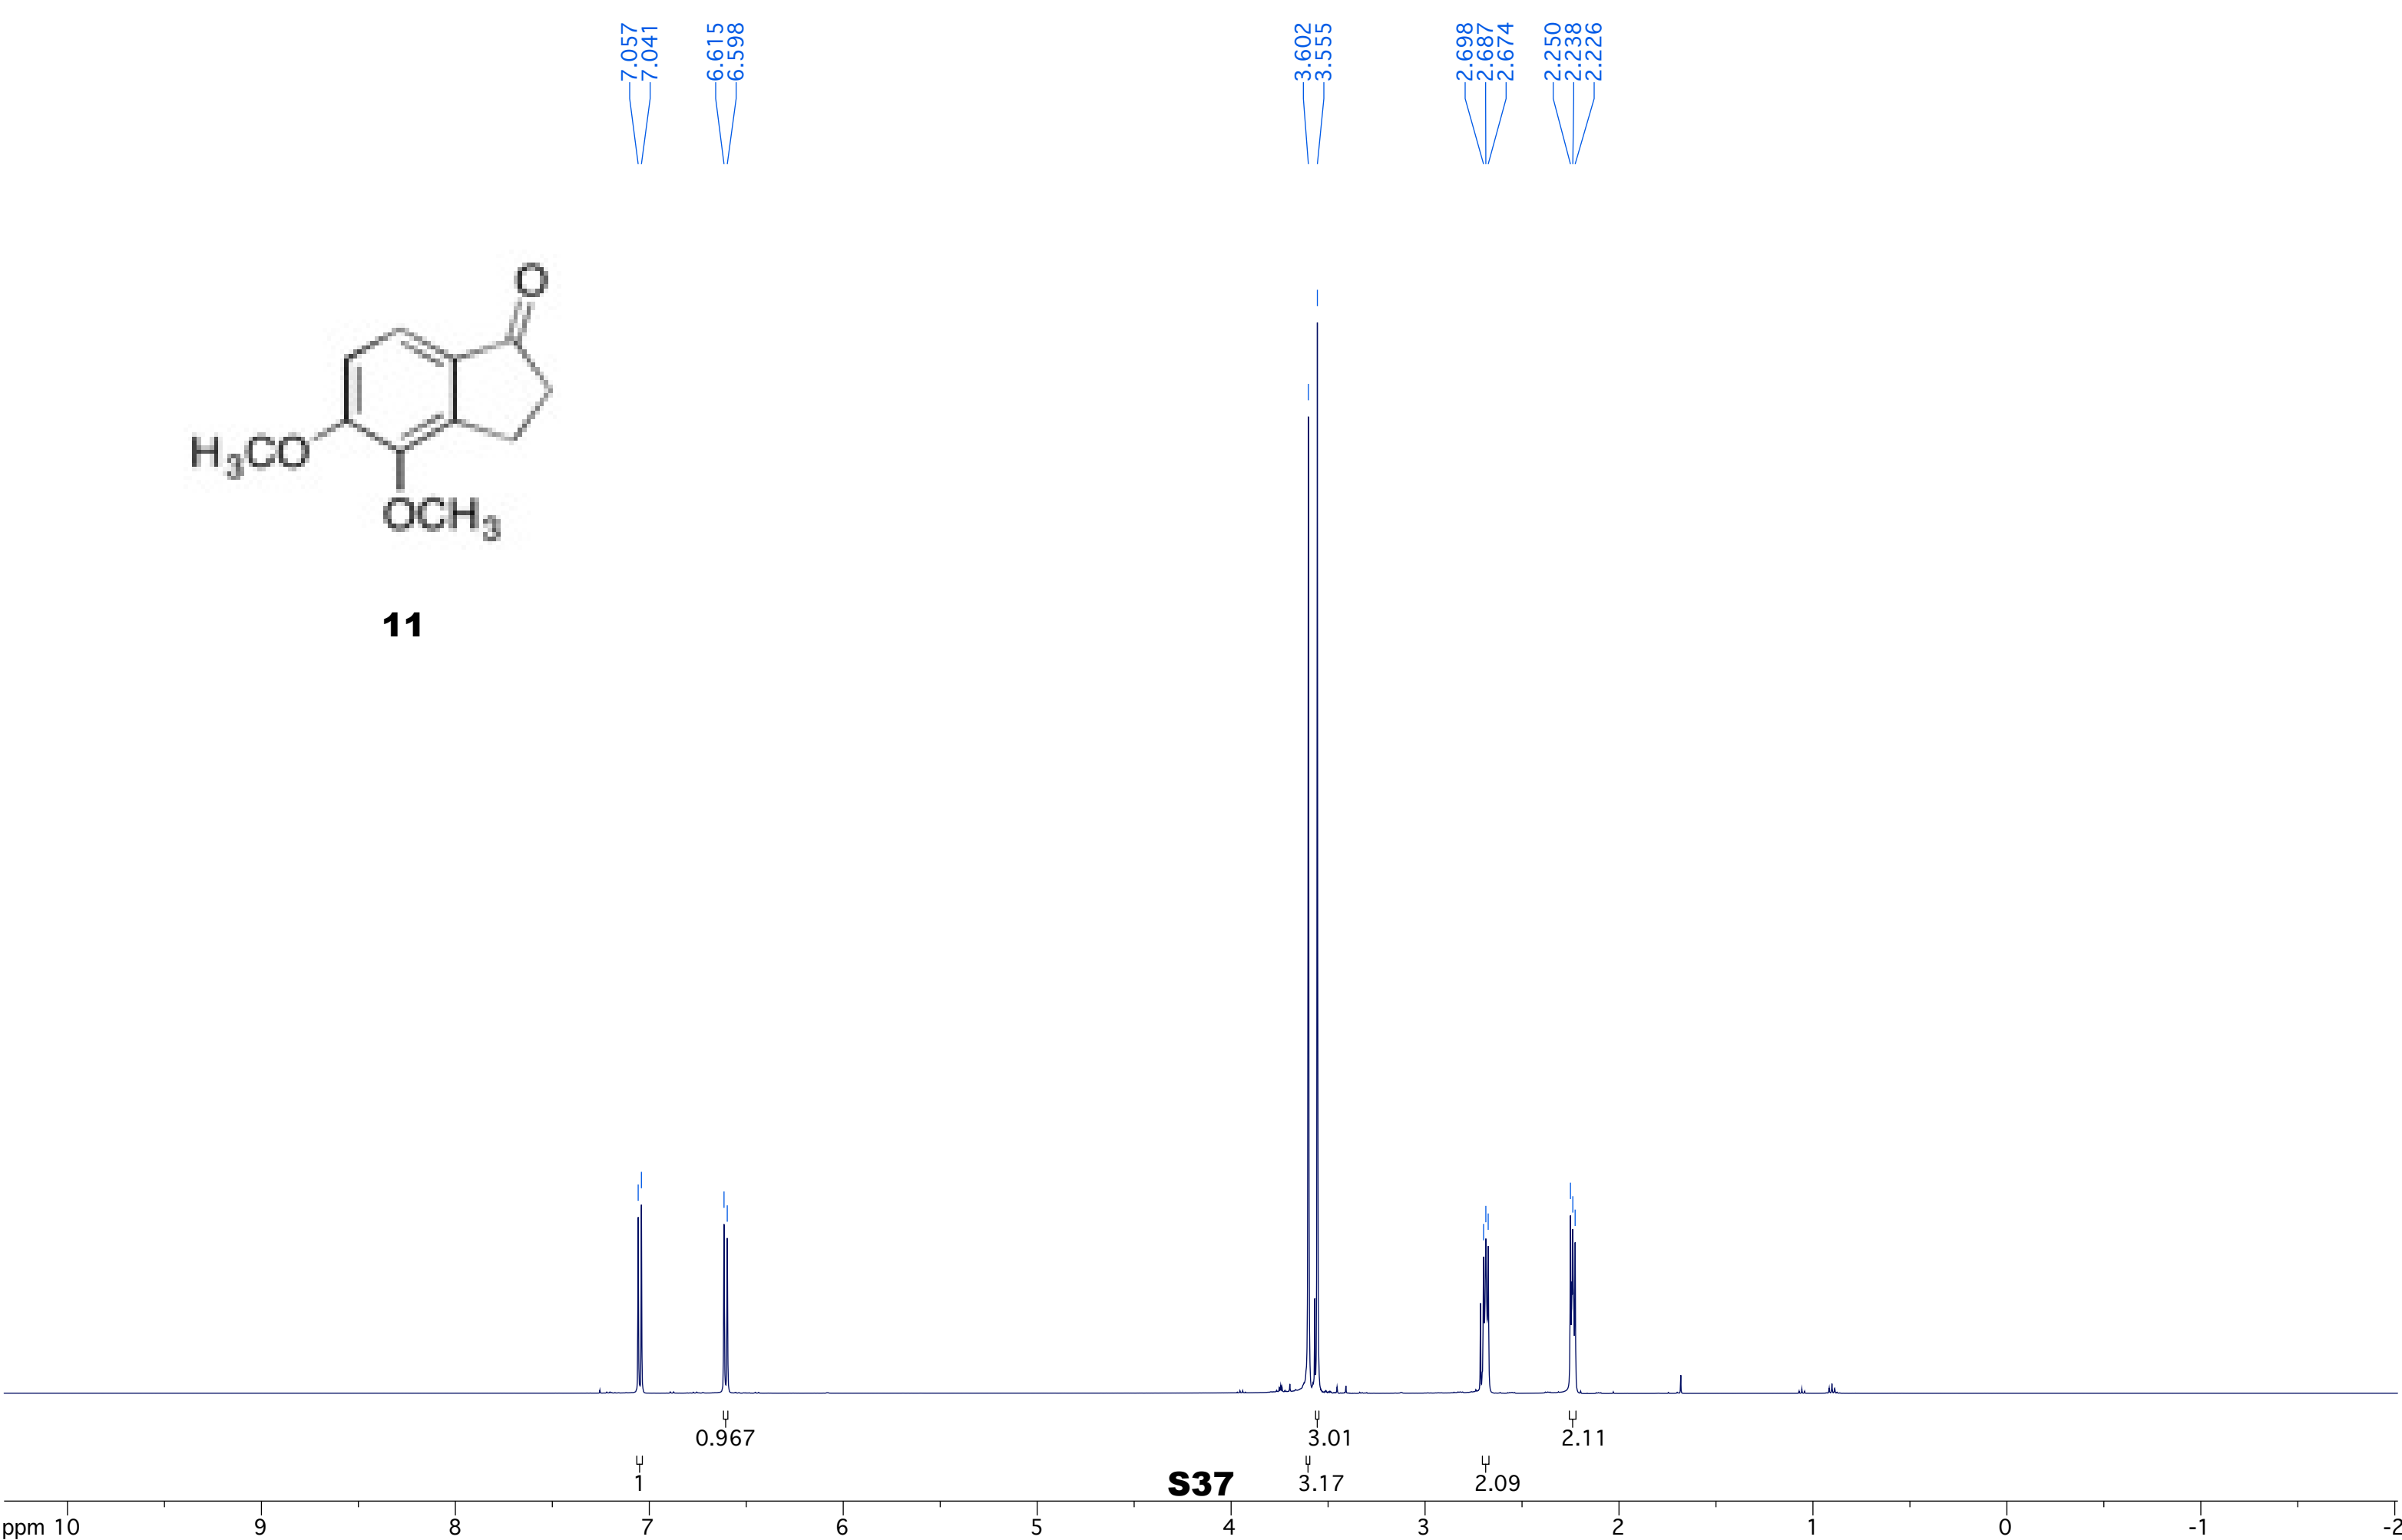

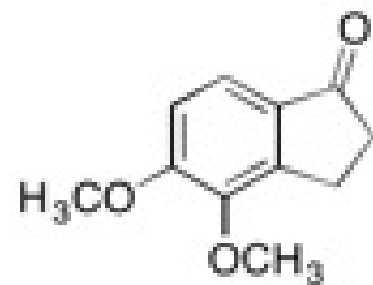

**11**

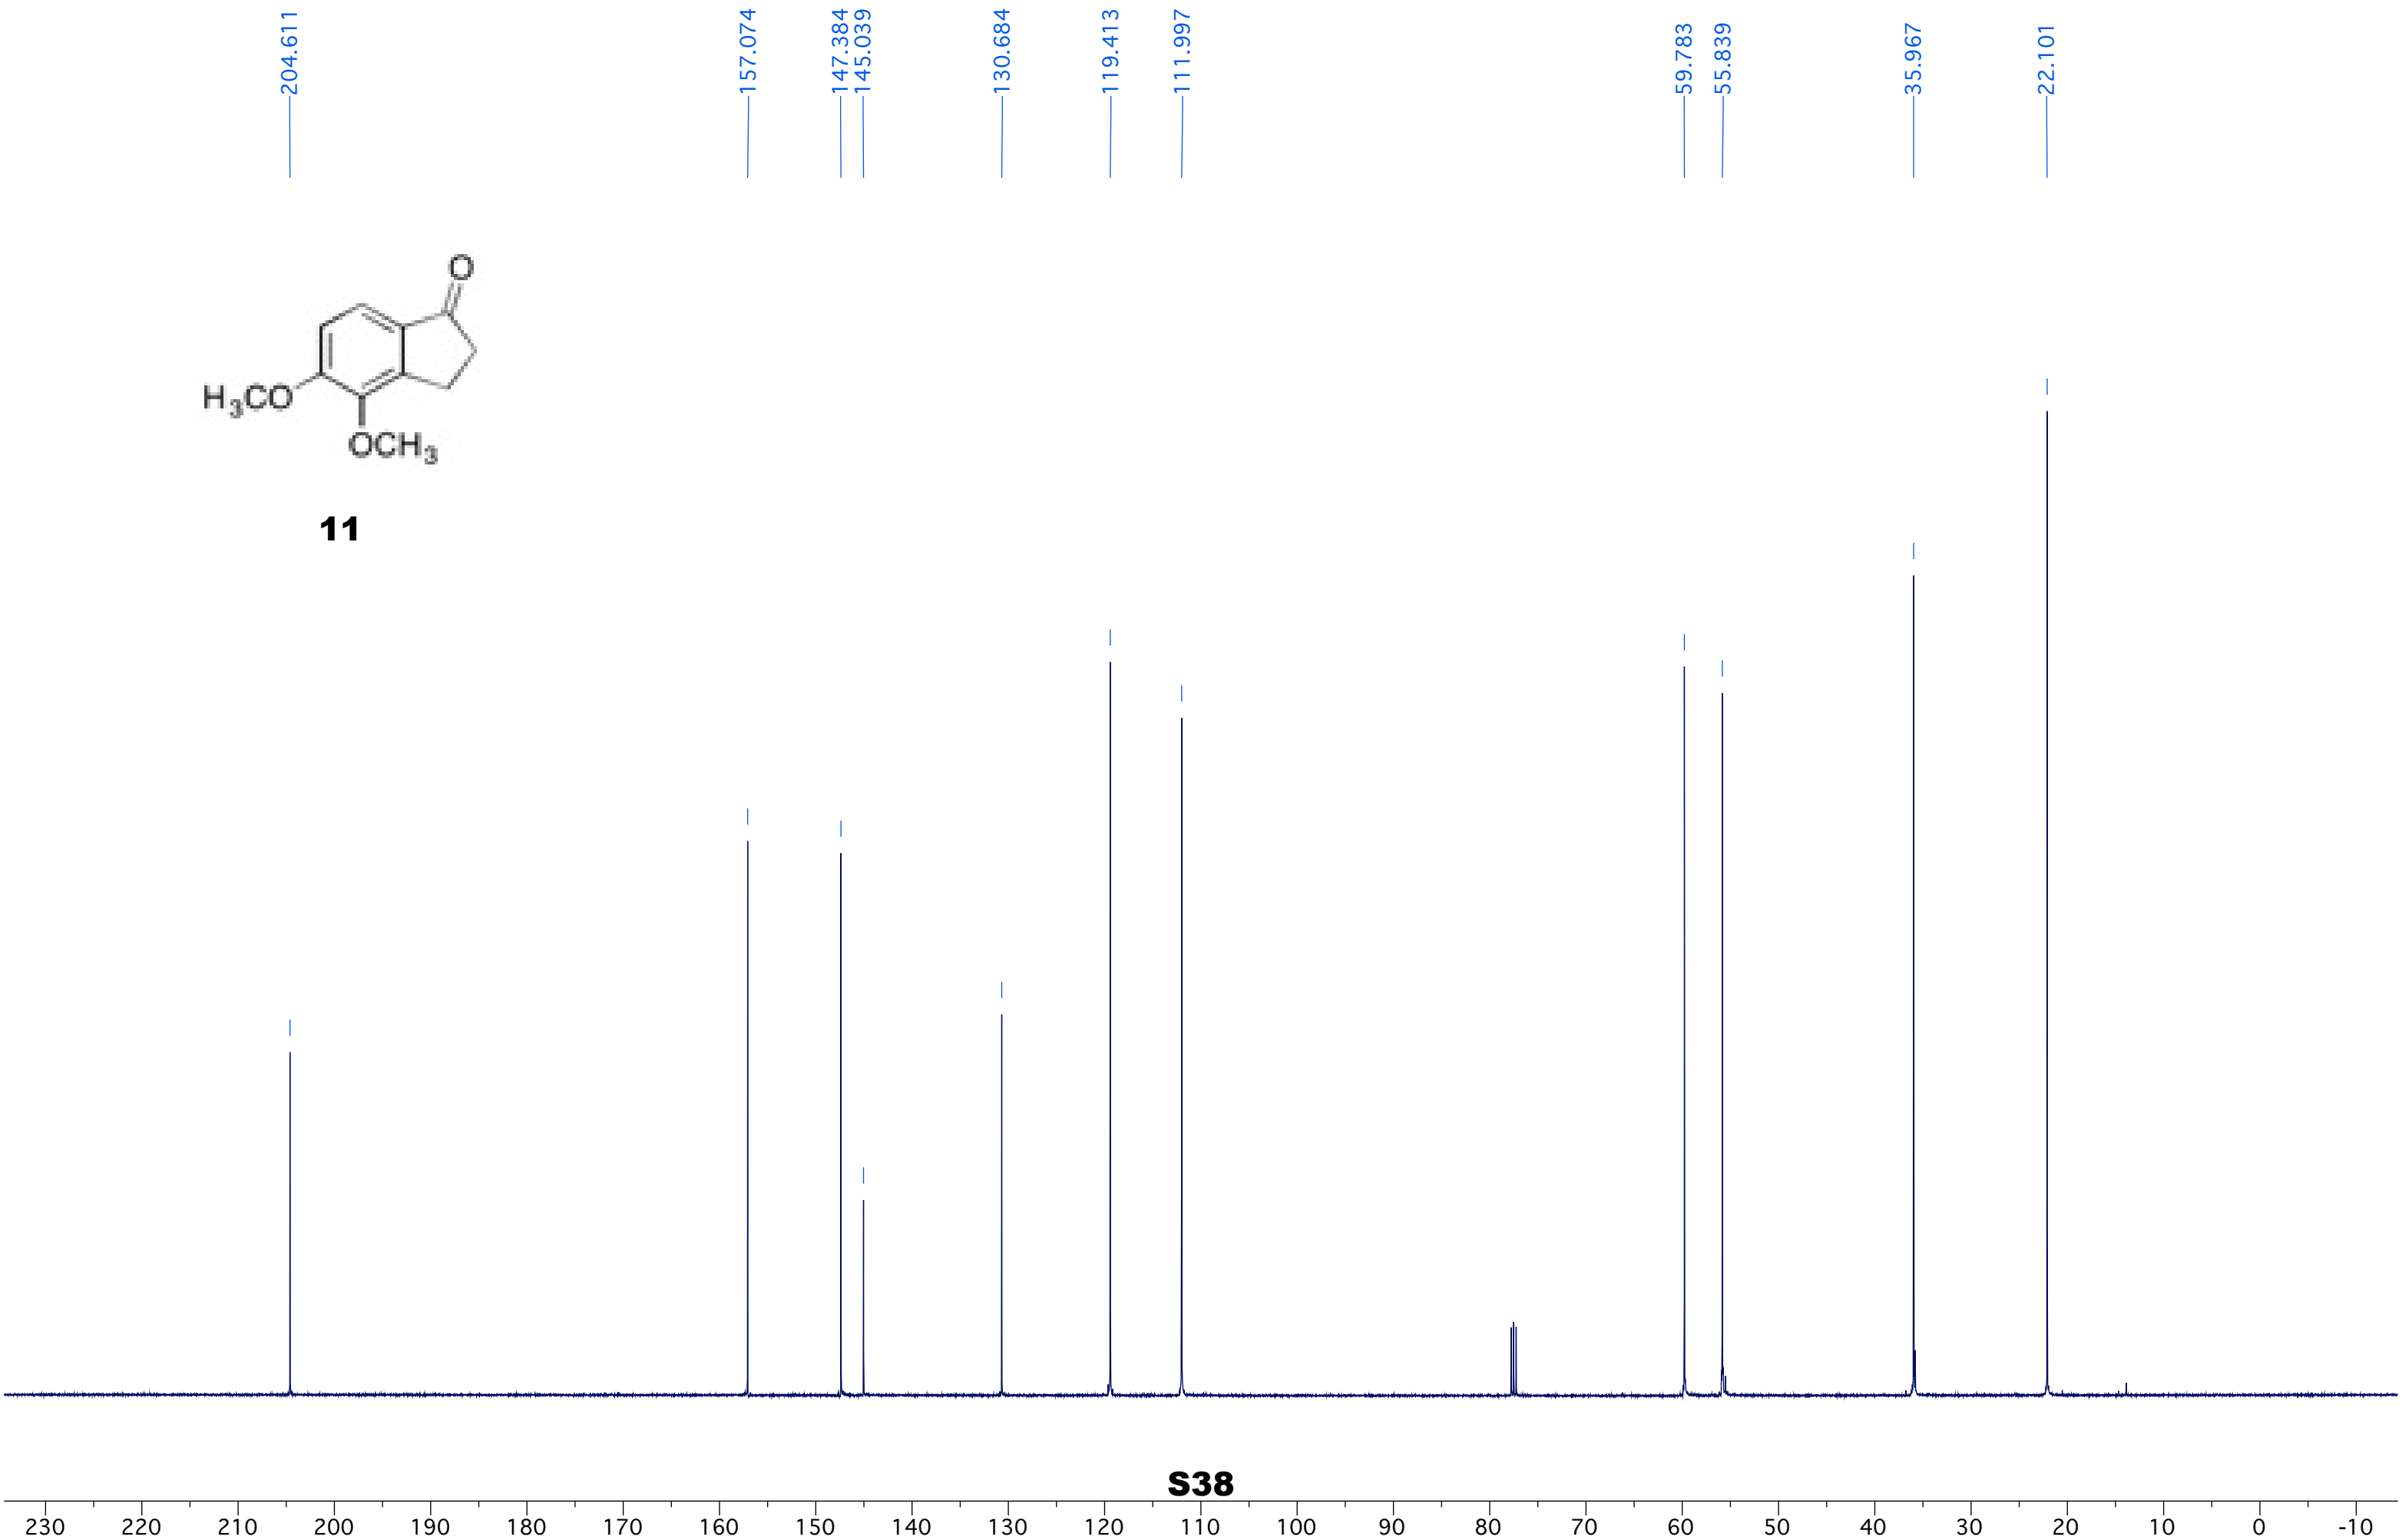

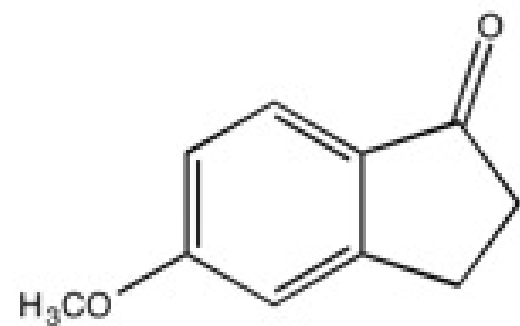

**12**

7.498  
7.483

6.739  
6.723  
6.719

3.724

2.918  
2.906  
2.894

2.492  
2.481  
2.469

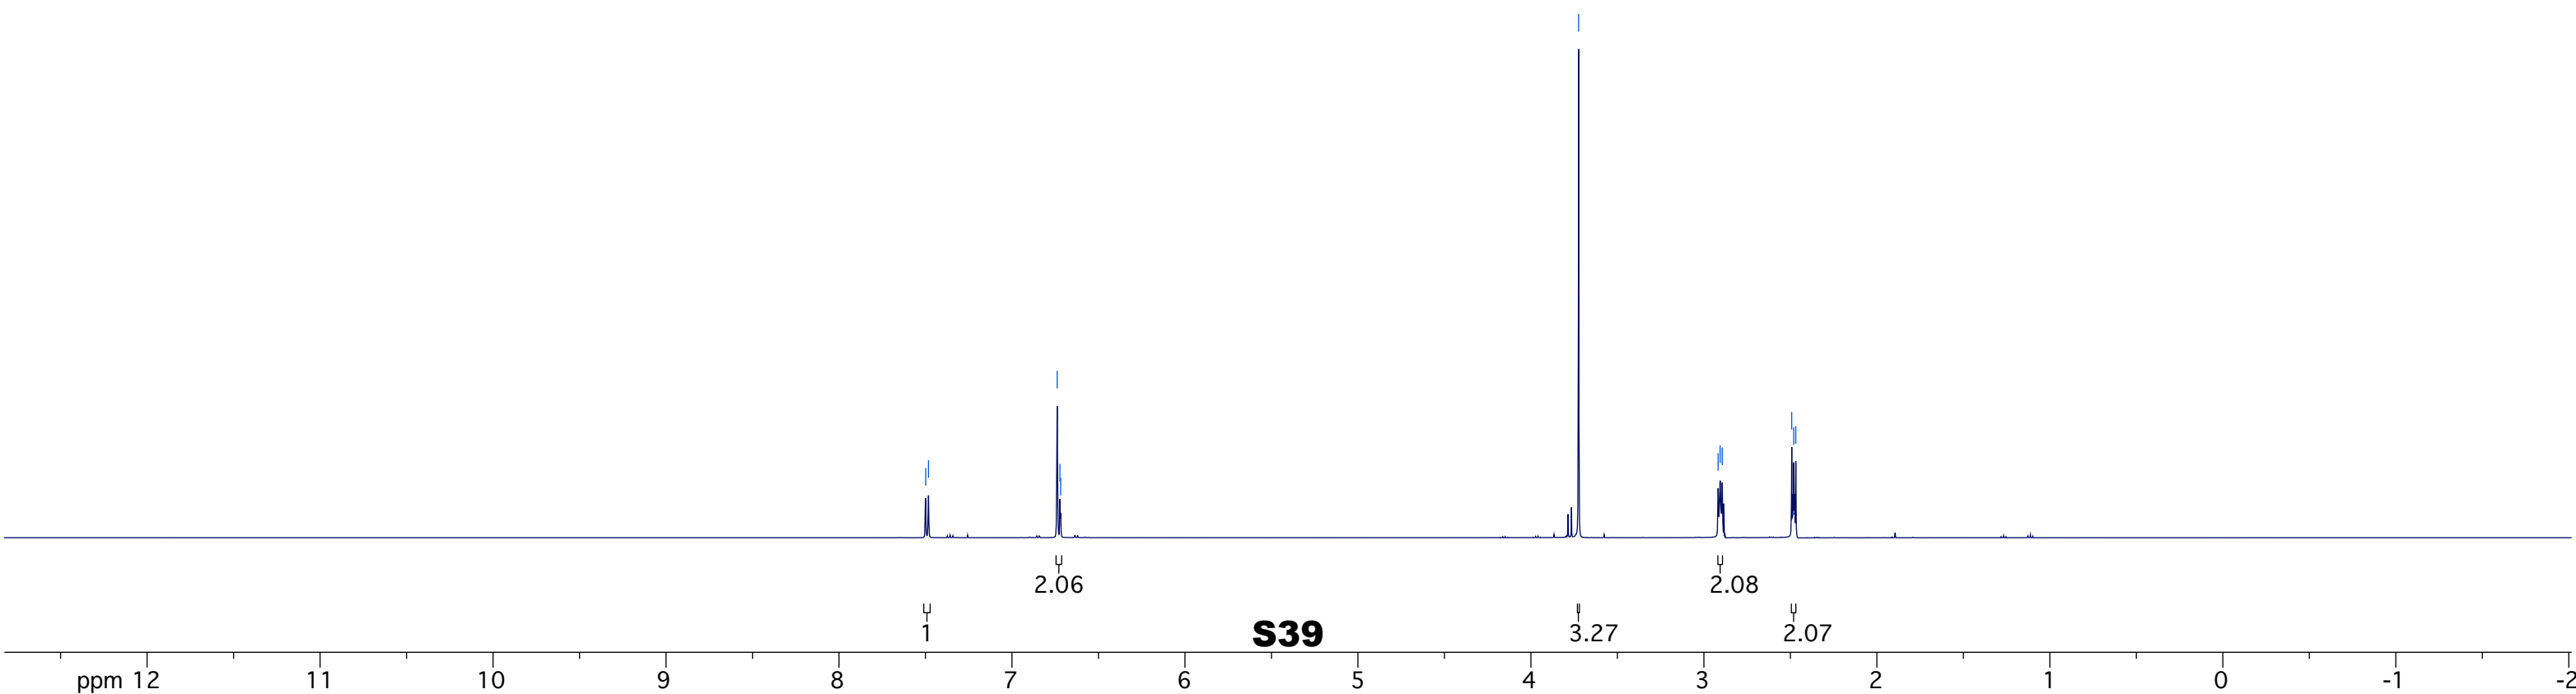

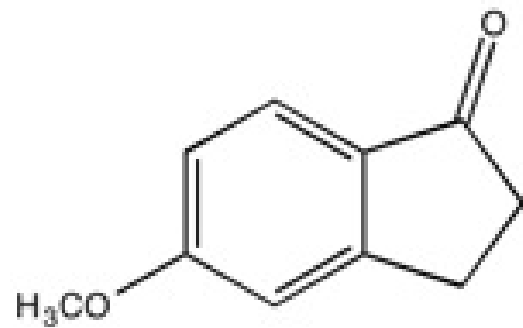

**12**

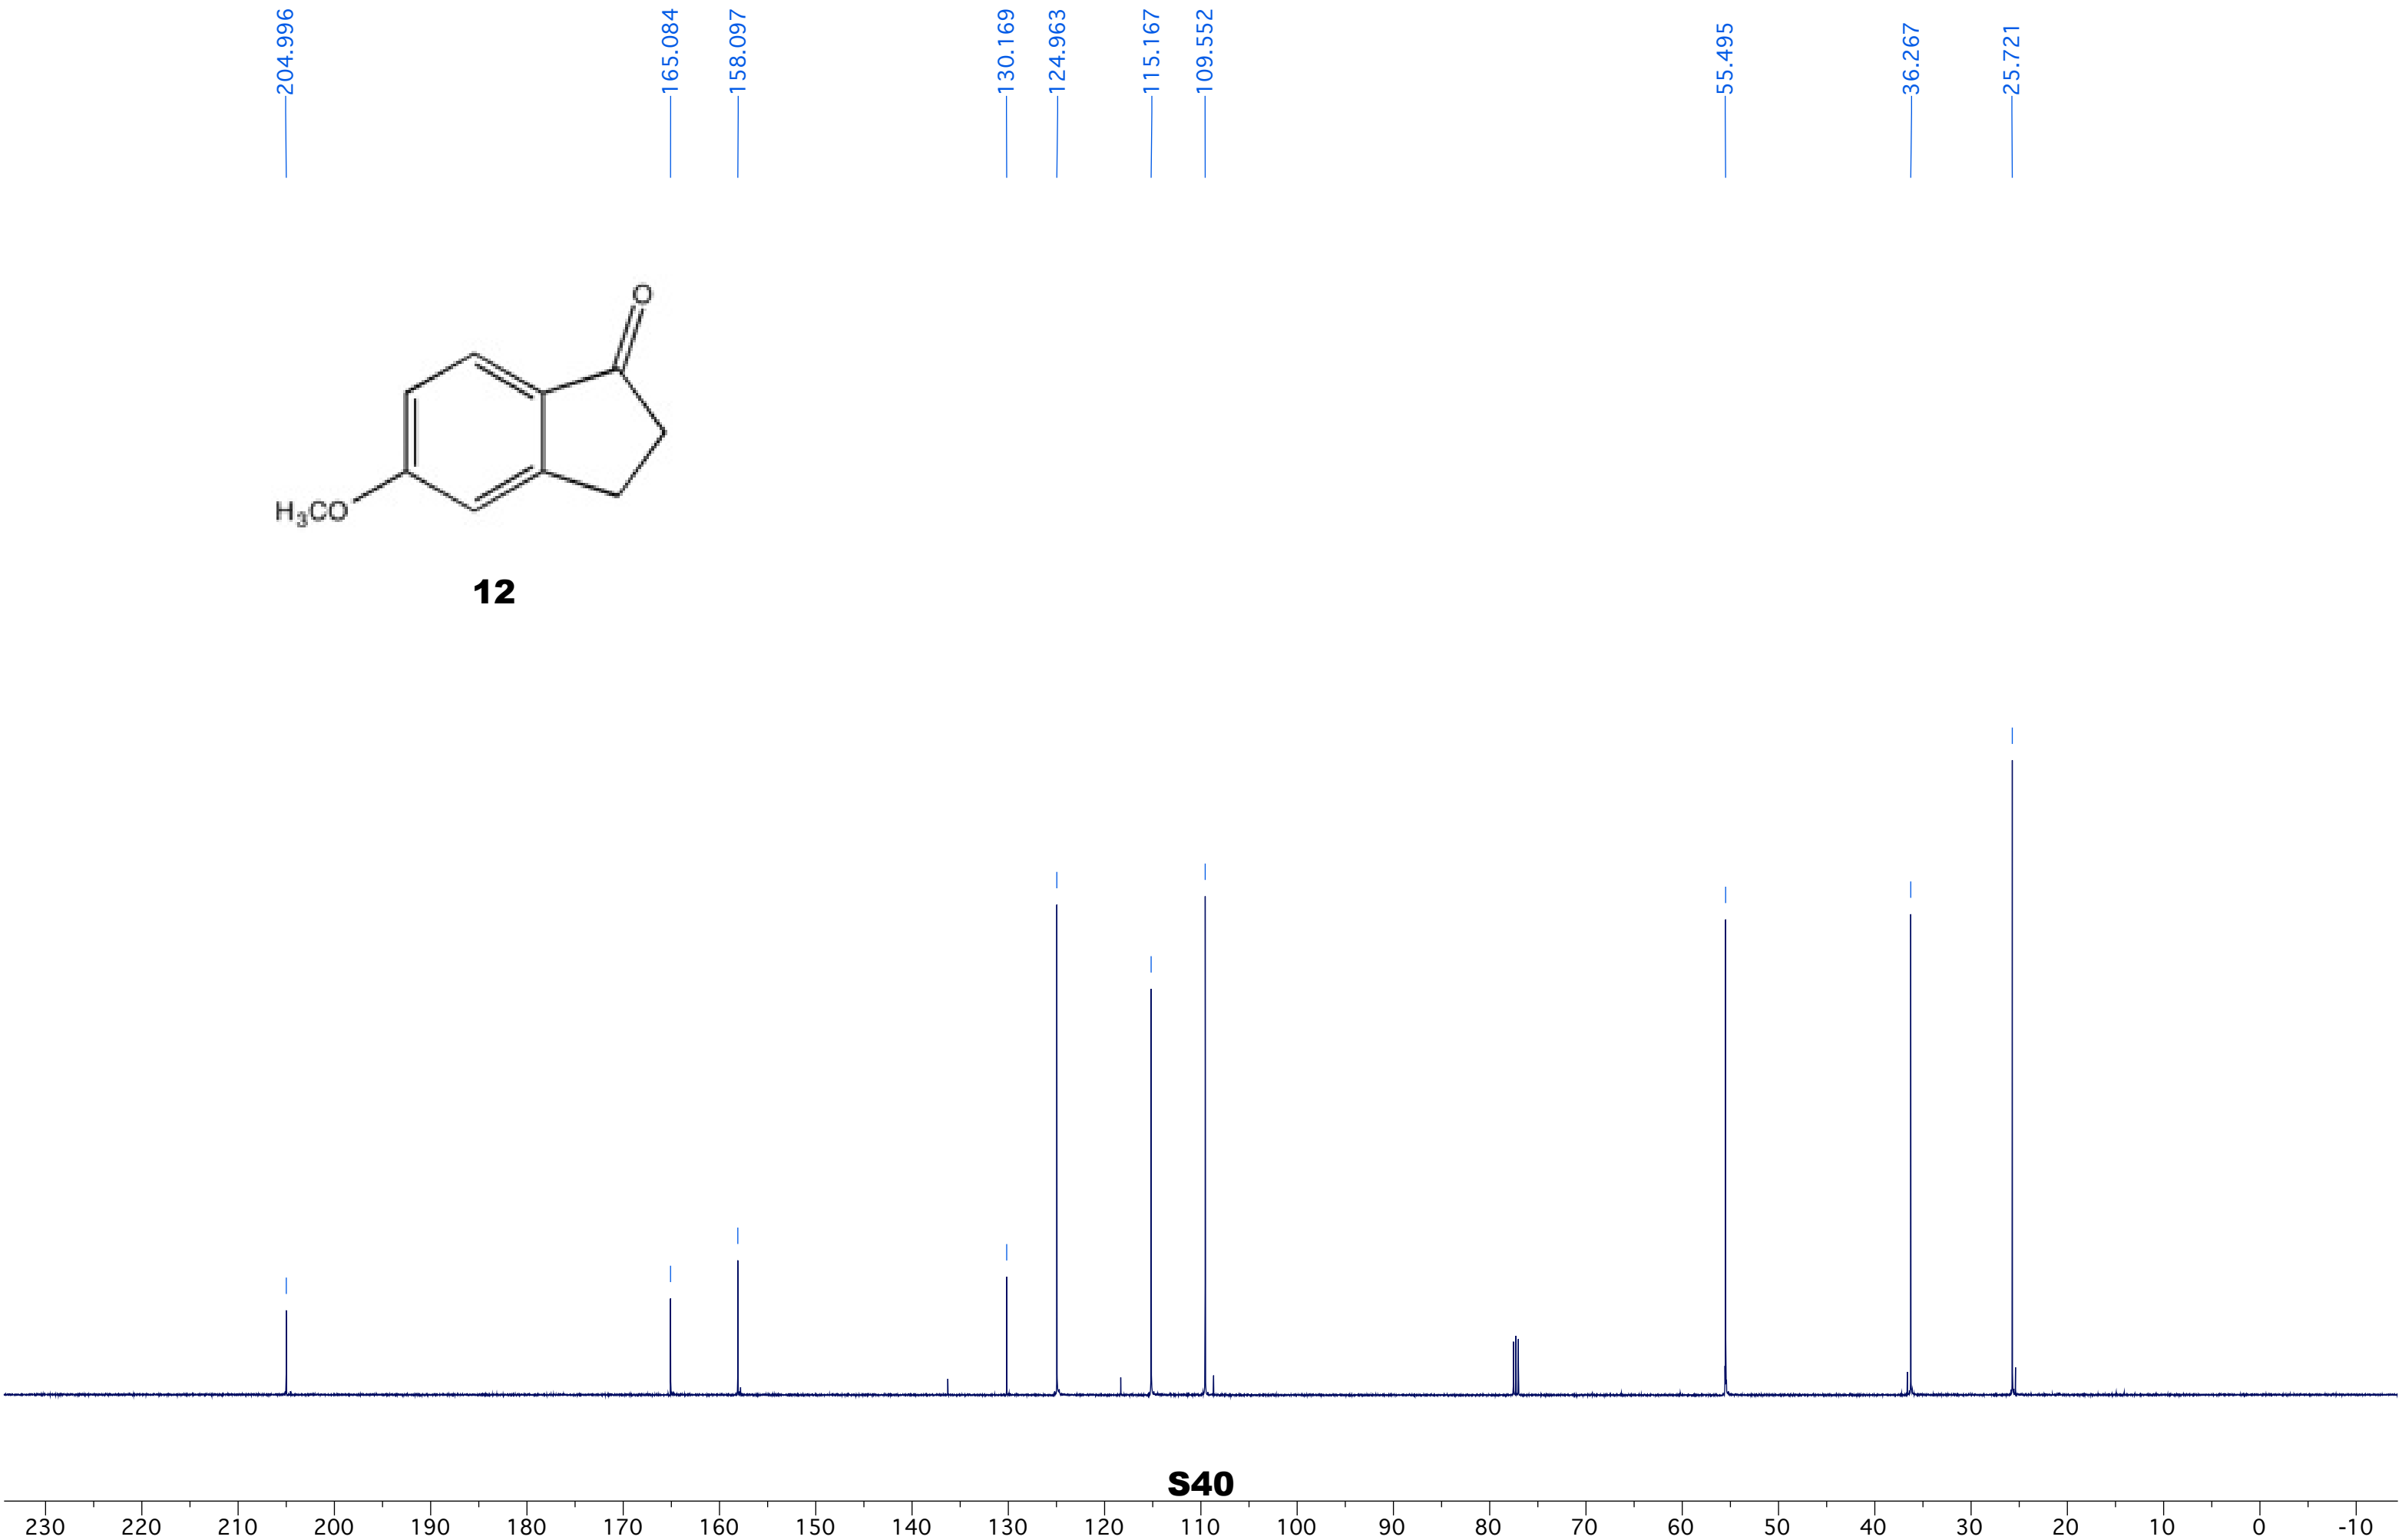



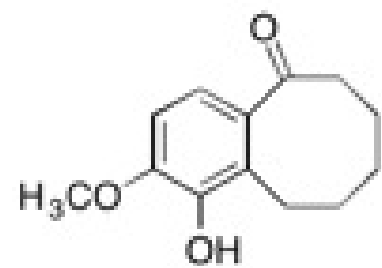

**13**

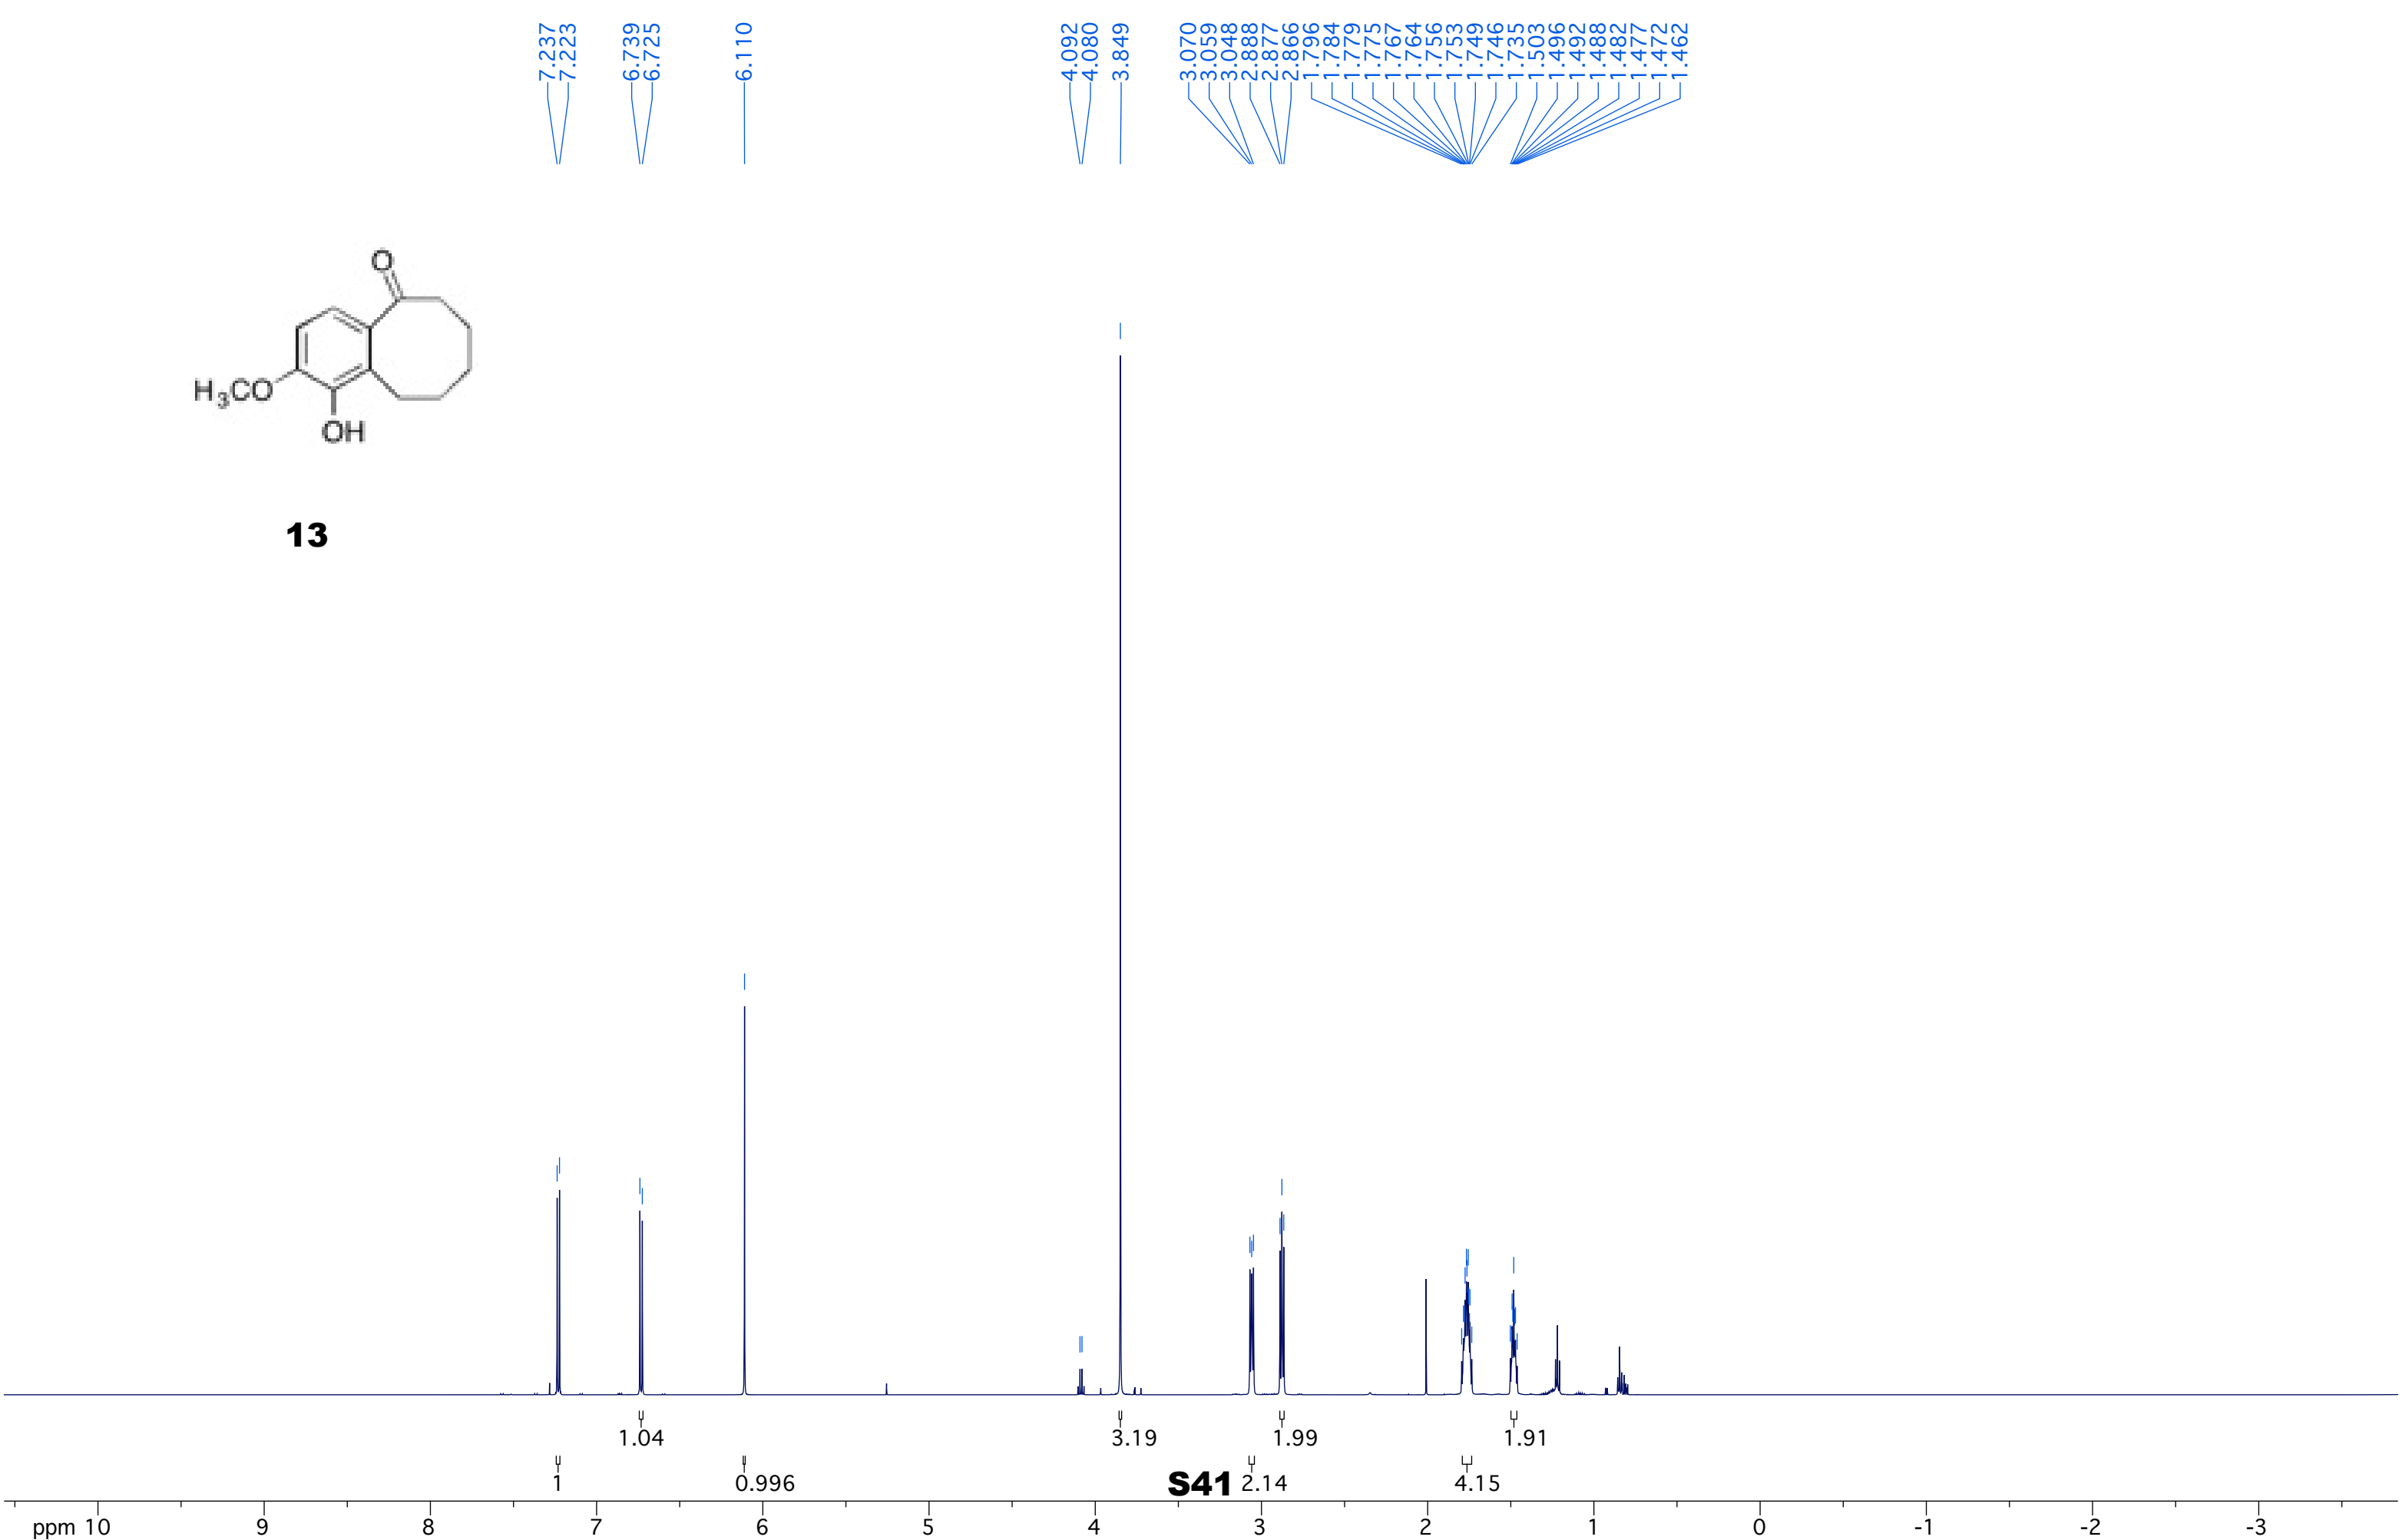

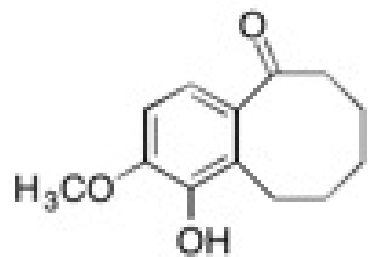

**13**

206.445

148.748

142.907

133.655

126.663

120.112

107.917

55.976

44.381

25.904

25.742

25.298

23.853

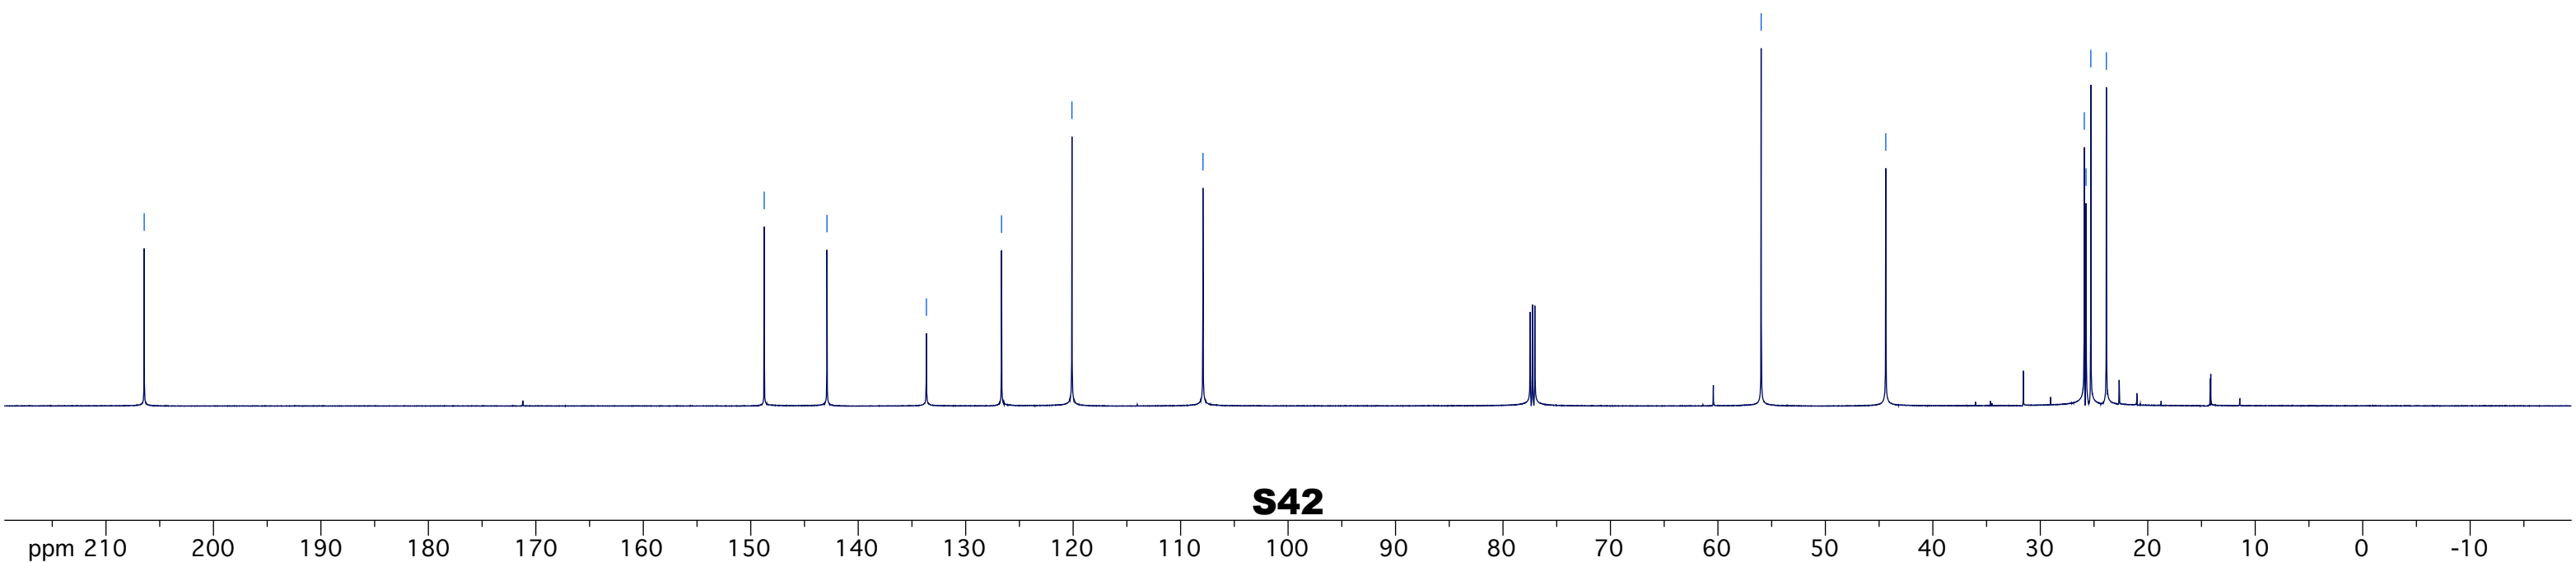

**S42**

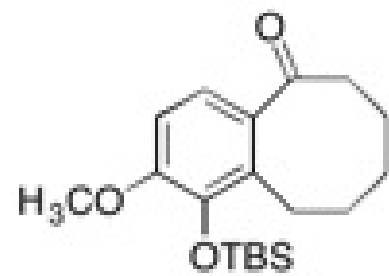

**14**

7.048  
7.034

6.577  
6.562

3.622

2.875

2.865

2.854

2.699

2.687

2.676

1.611

1.607

1.602

1.595

1.590

1.580

1.575

1.563

1.559

1.341

1.338

1.332

1.326

1.321

0.809

0.718

0.674

0.005

0.000

0.005

0.107

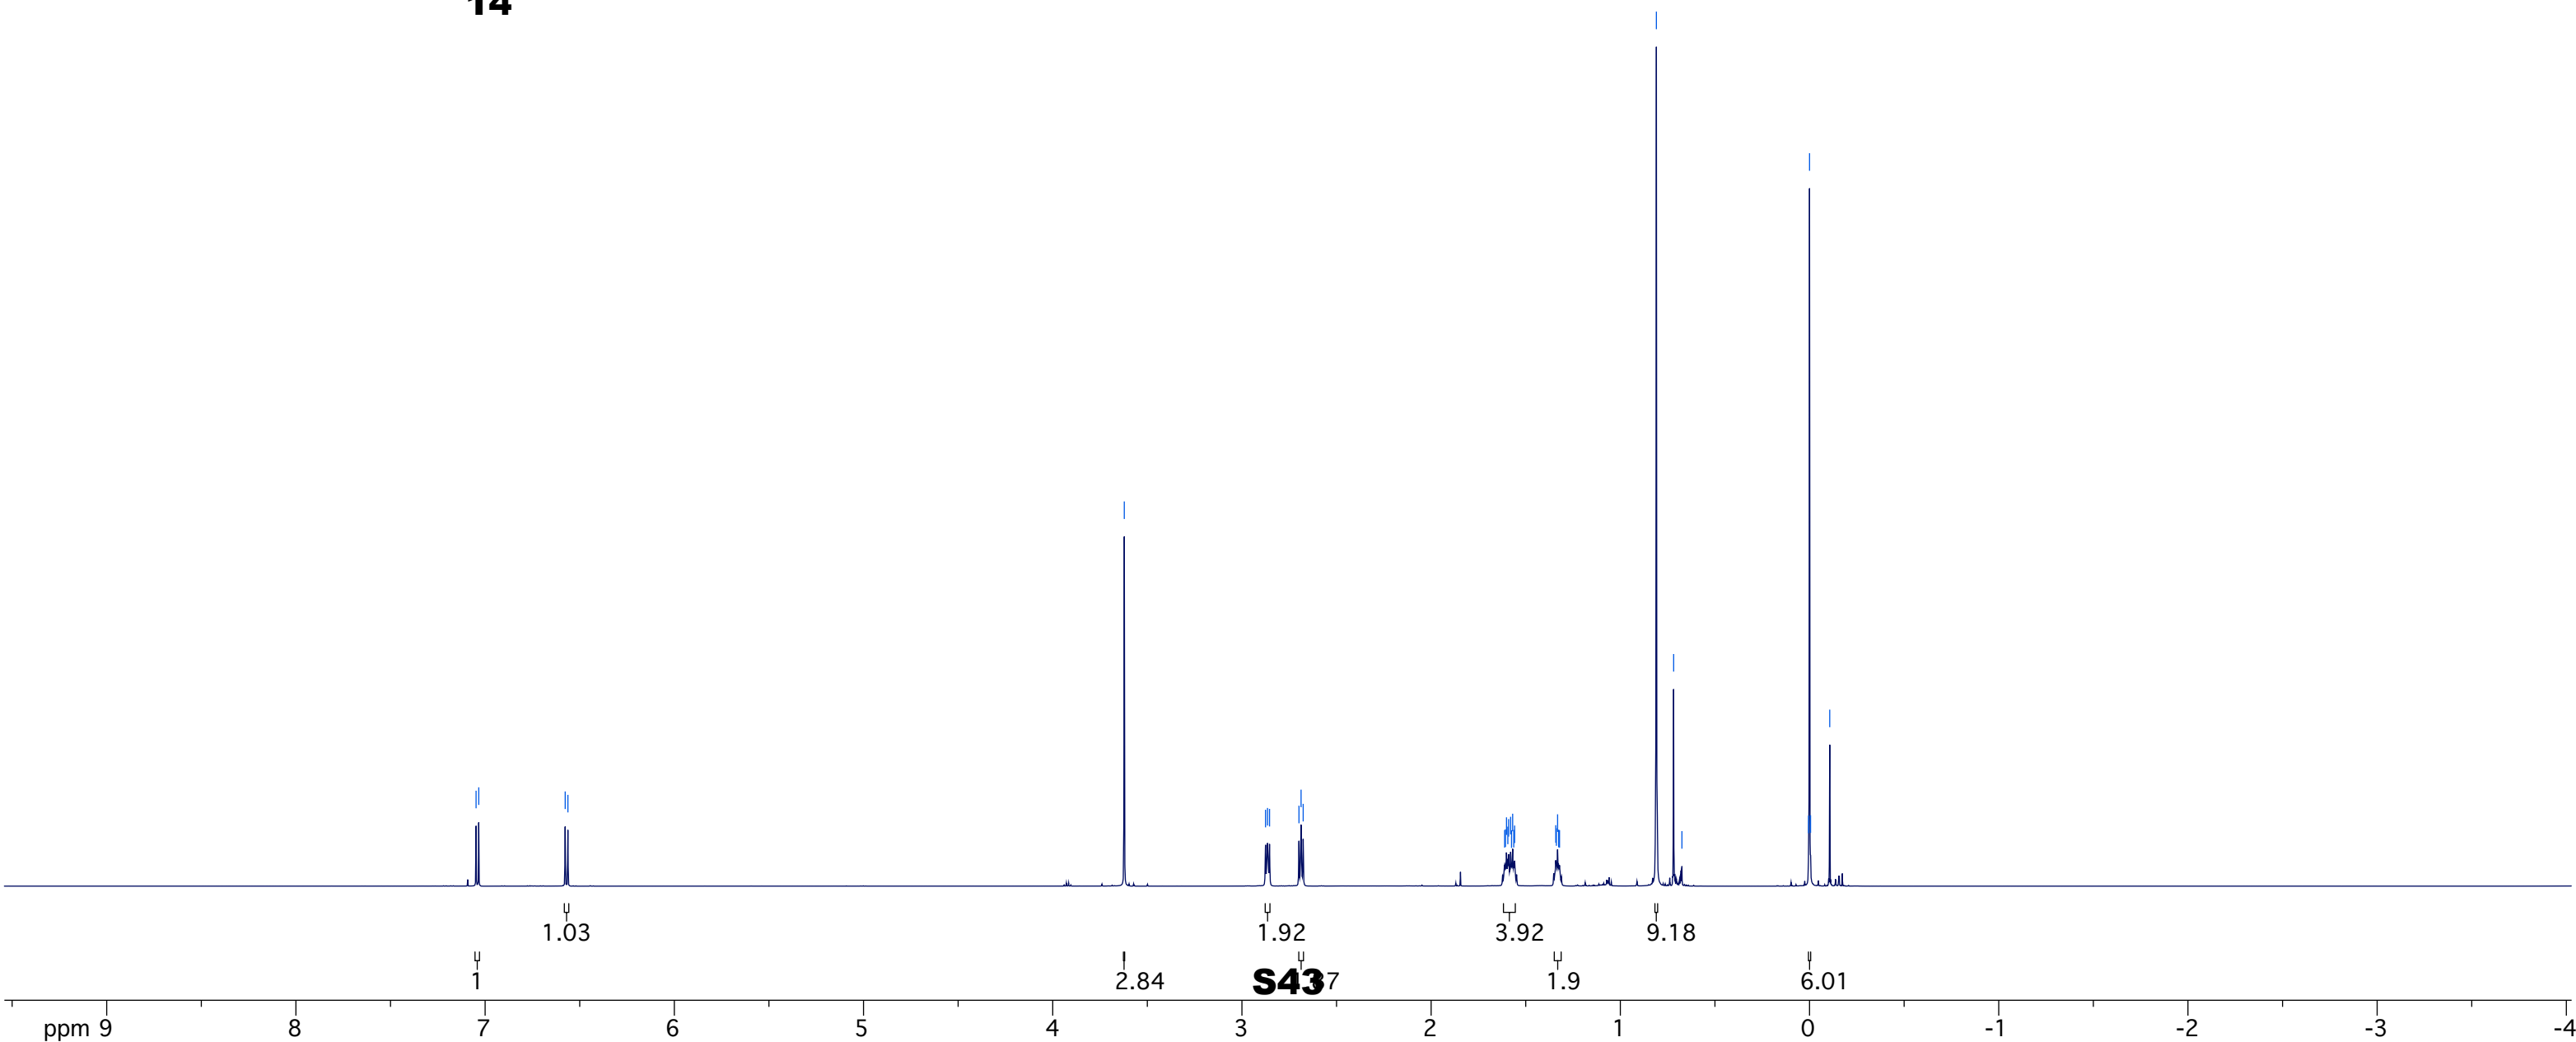

**S437**

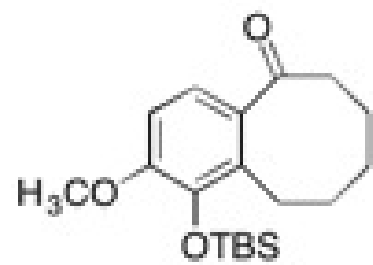

**14**

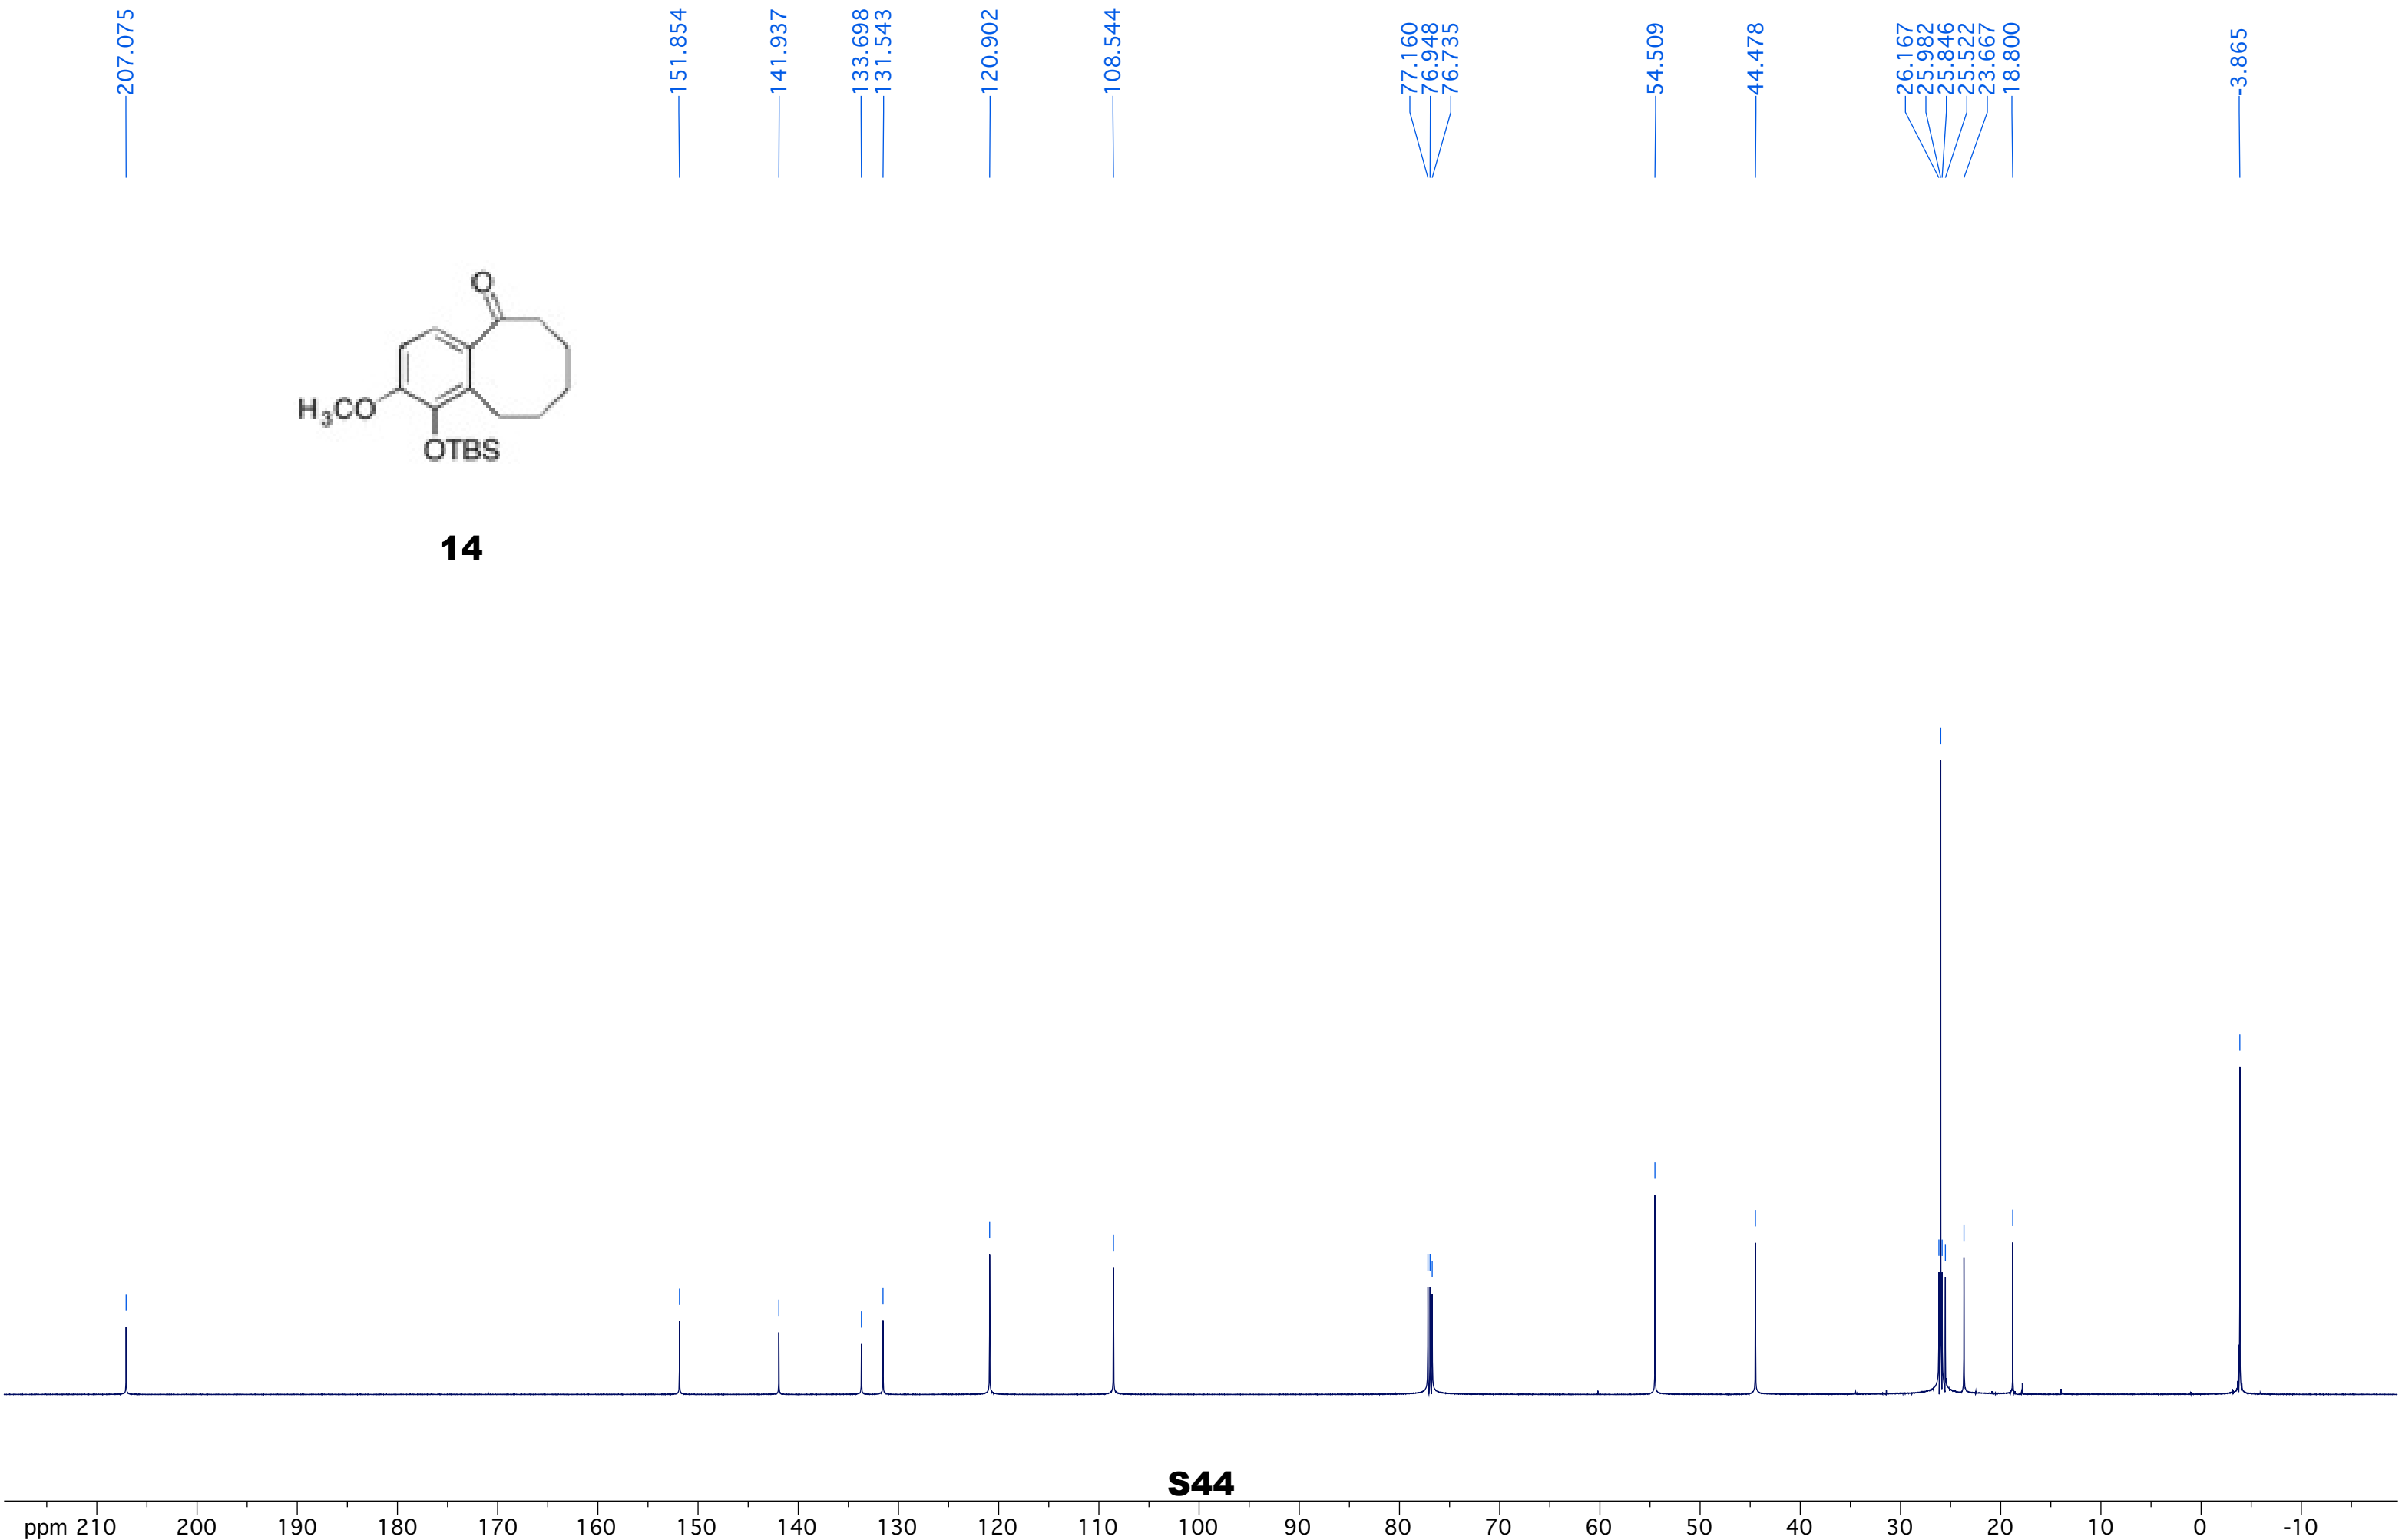

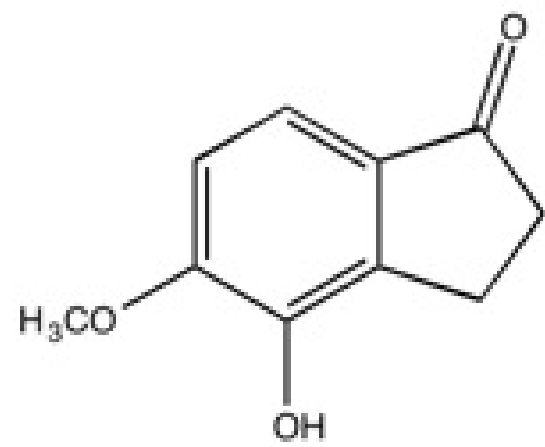

**15**

7.363  
7.346  
6.931  
6.914  
5.805  
3.968  
3.079  
3.068  
3.056  
2.696  
2.685  
2.673

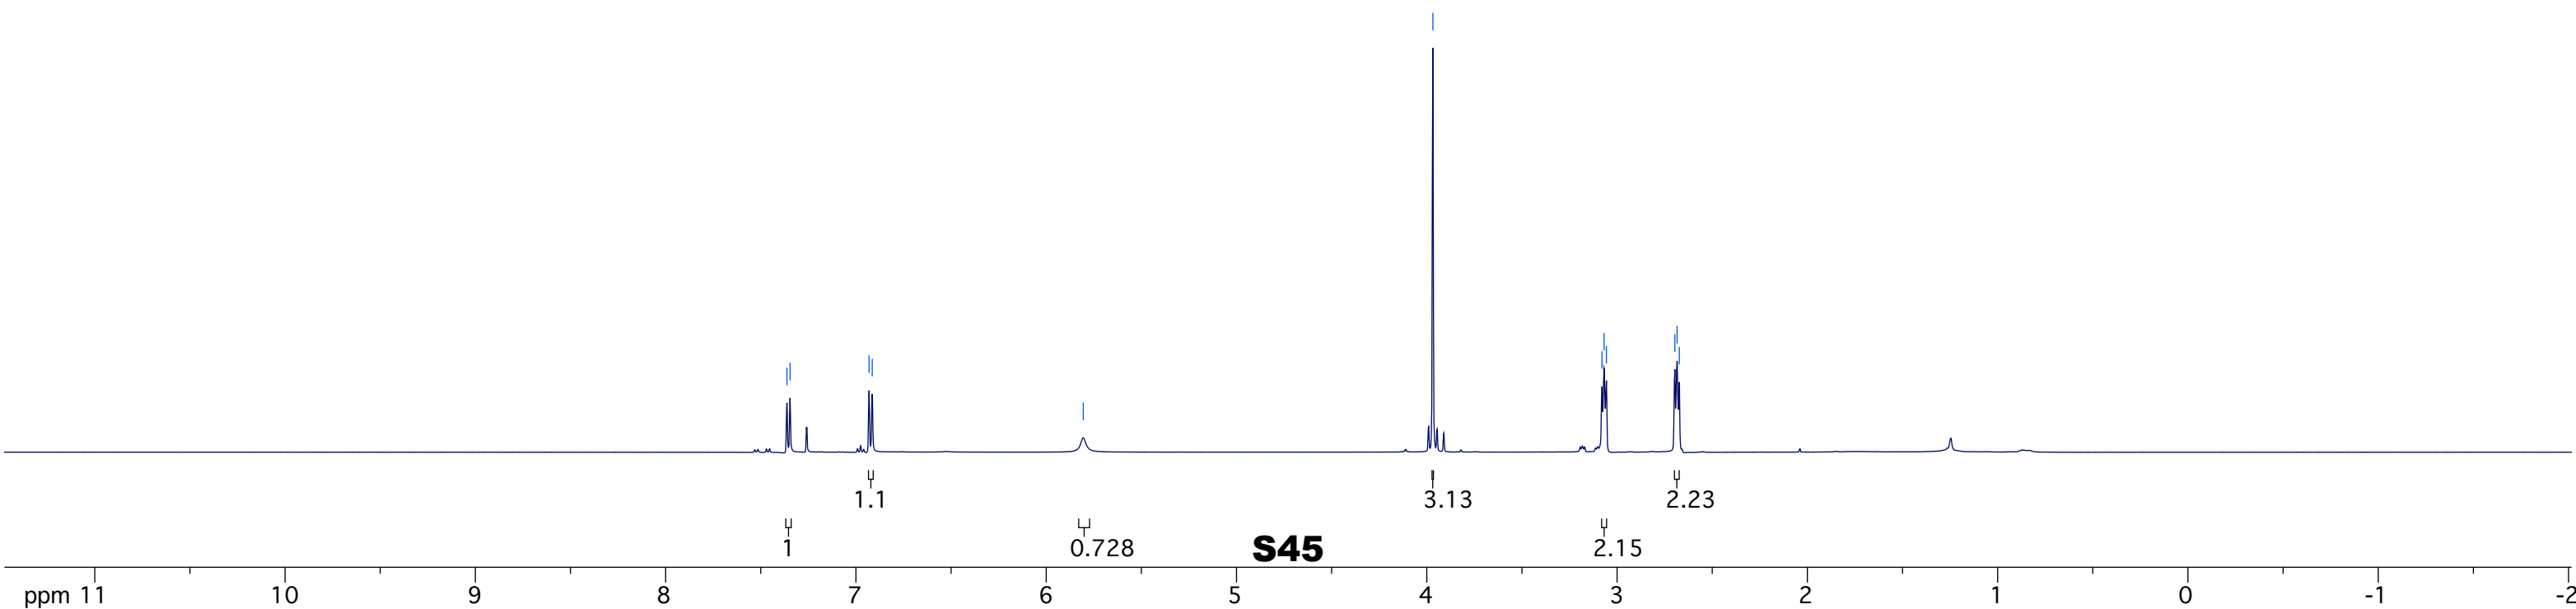

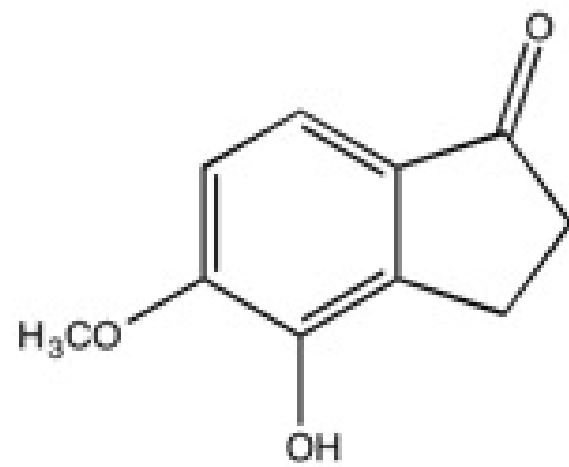

**15**

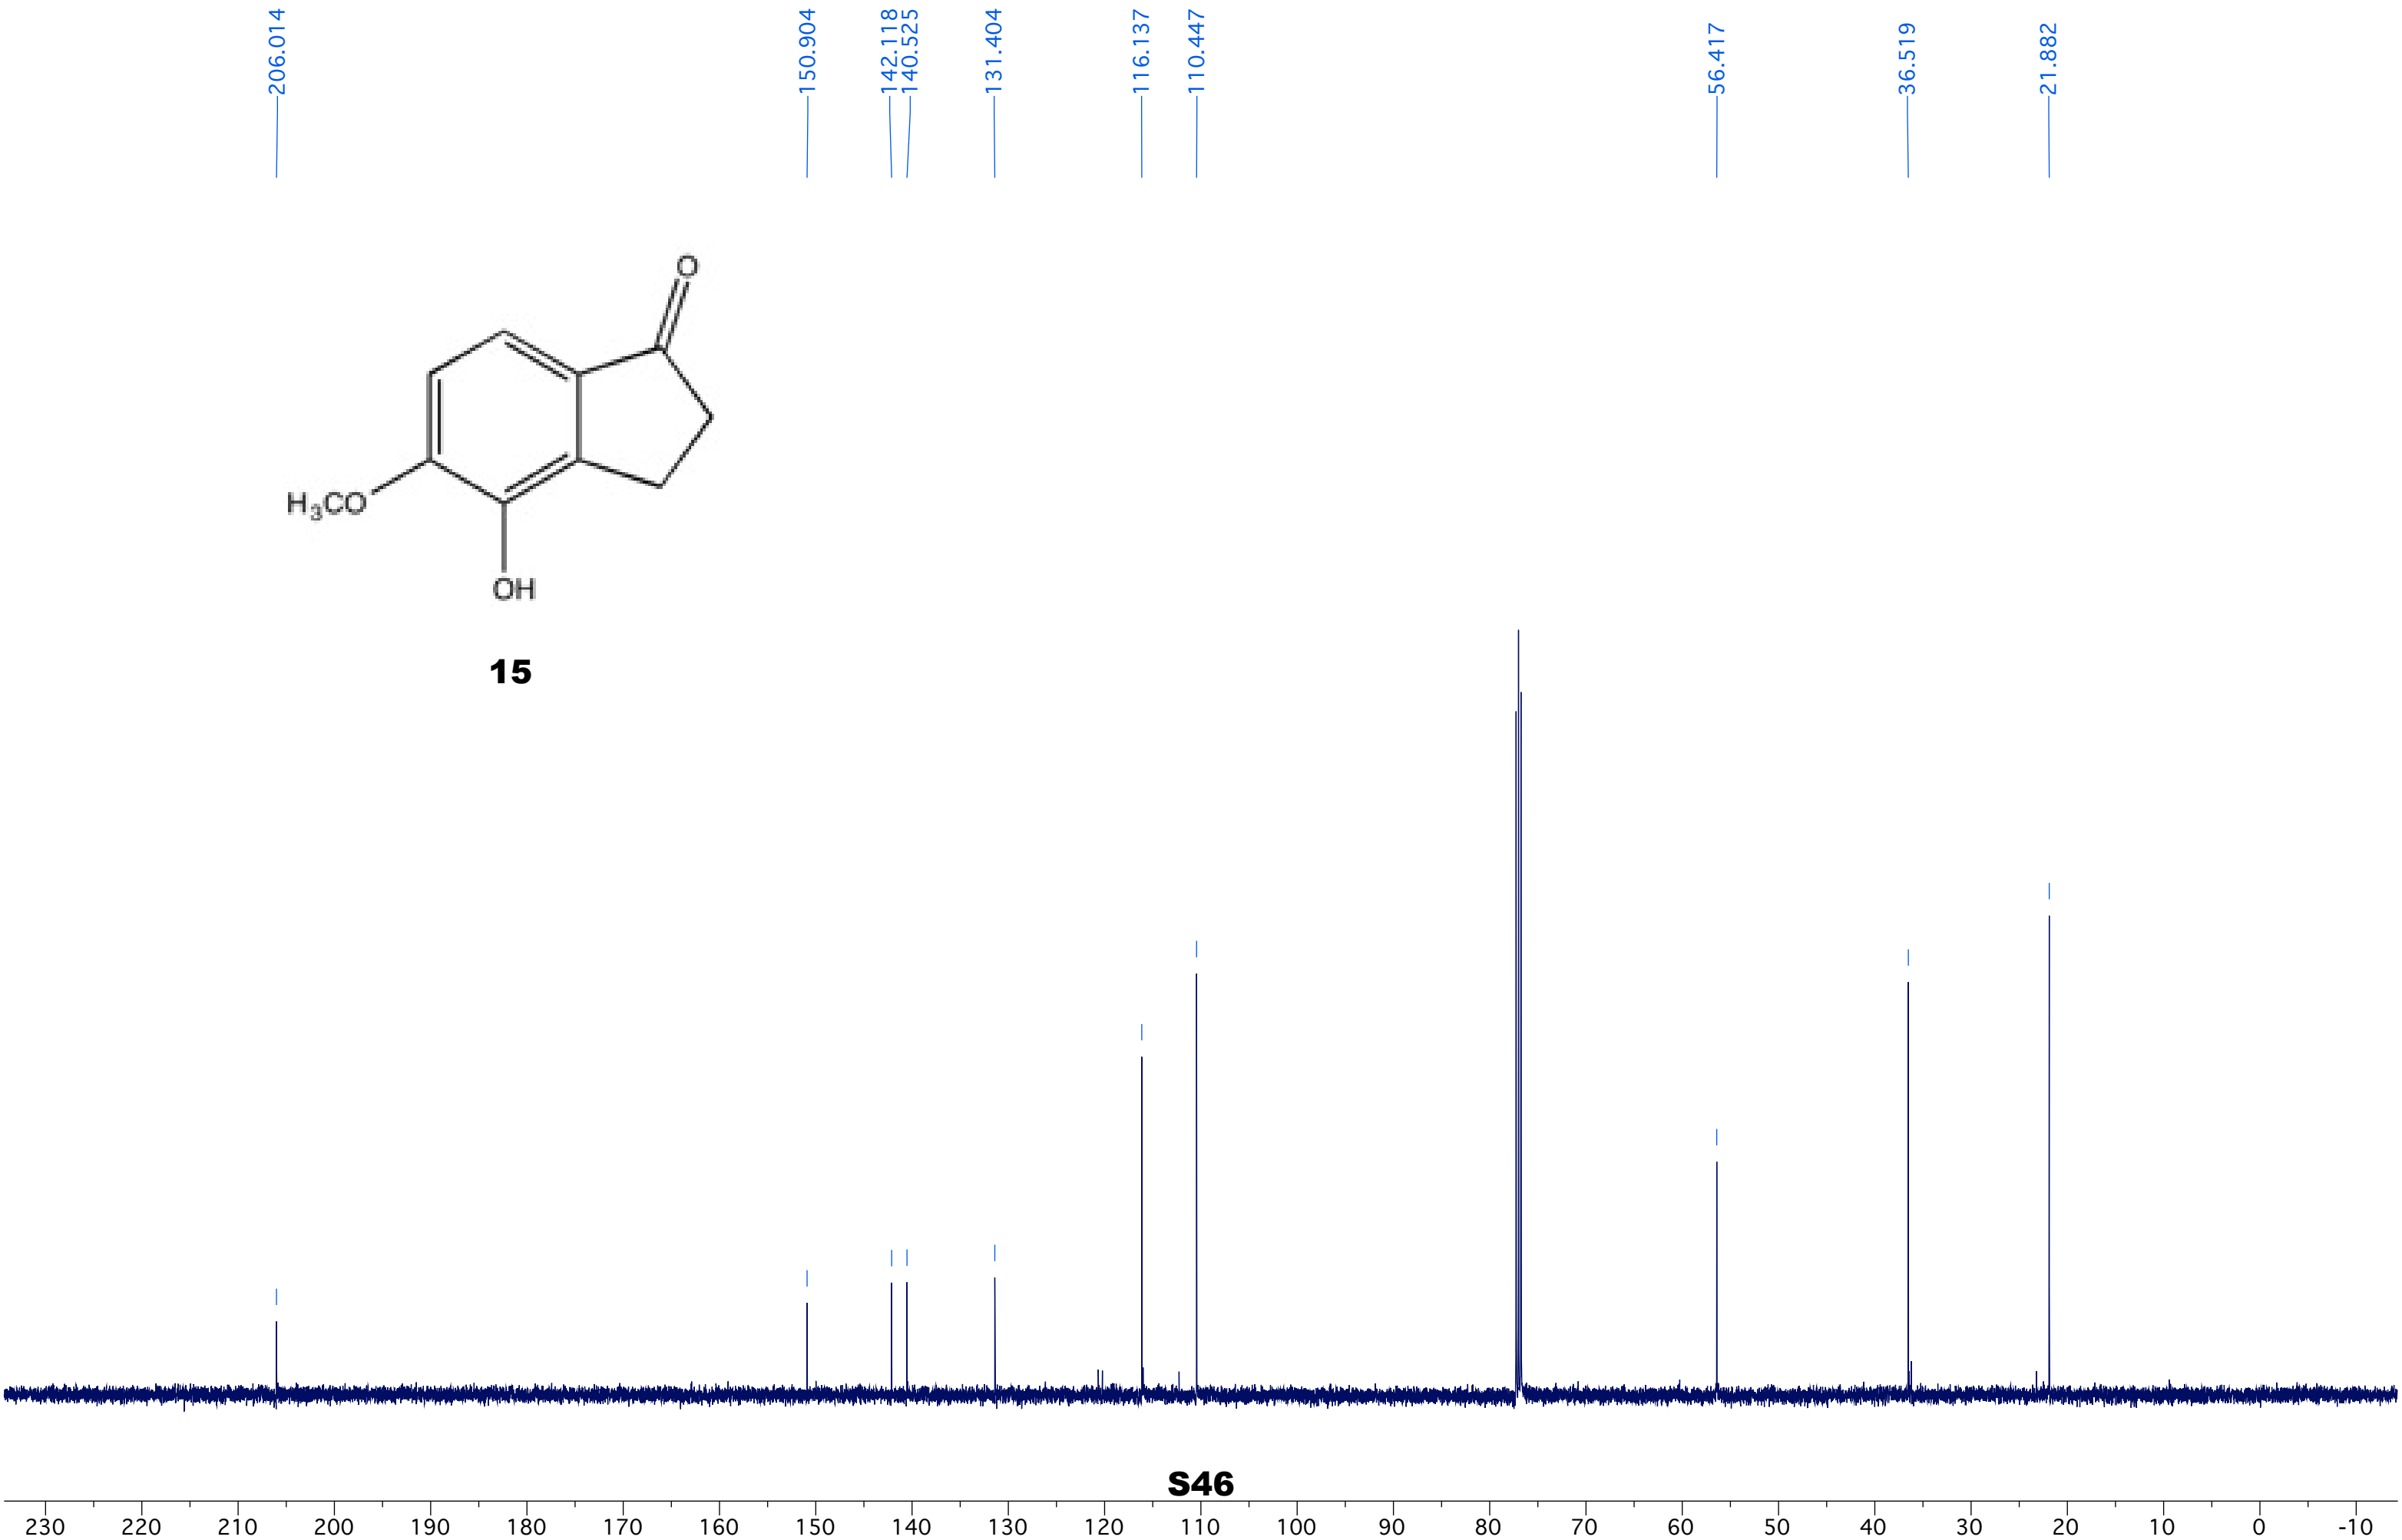

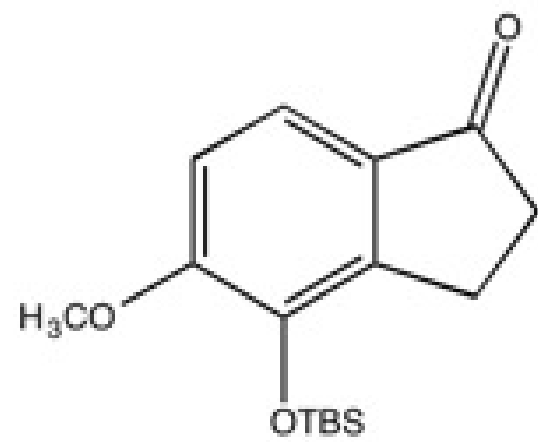

**16**

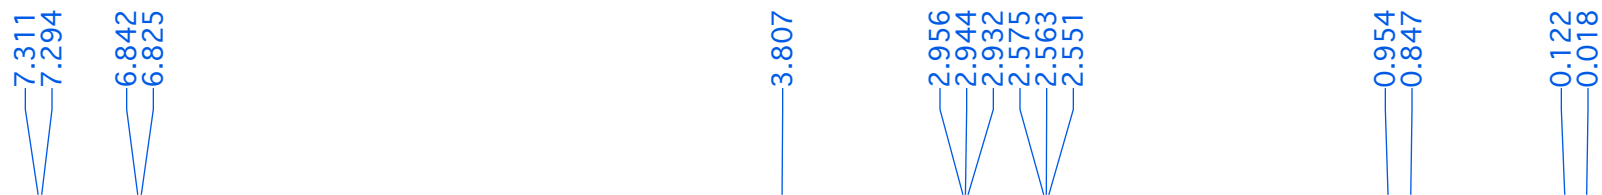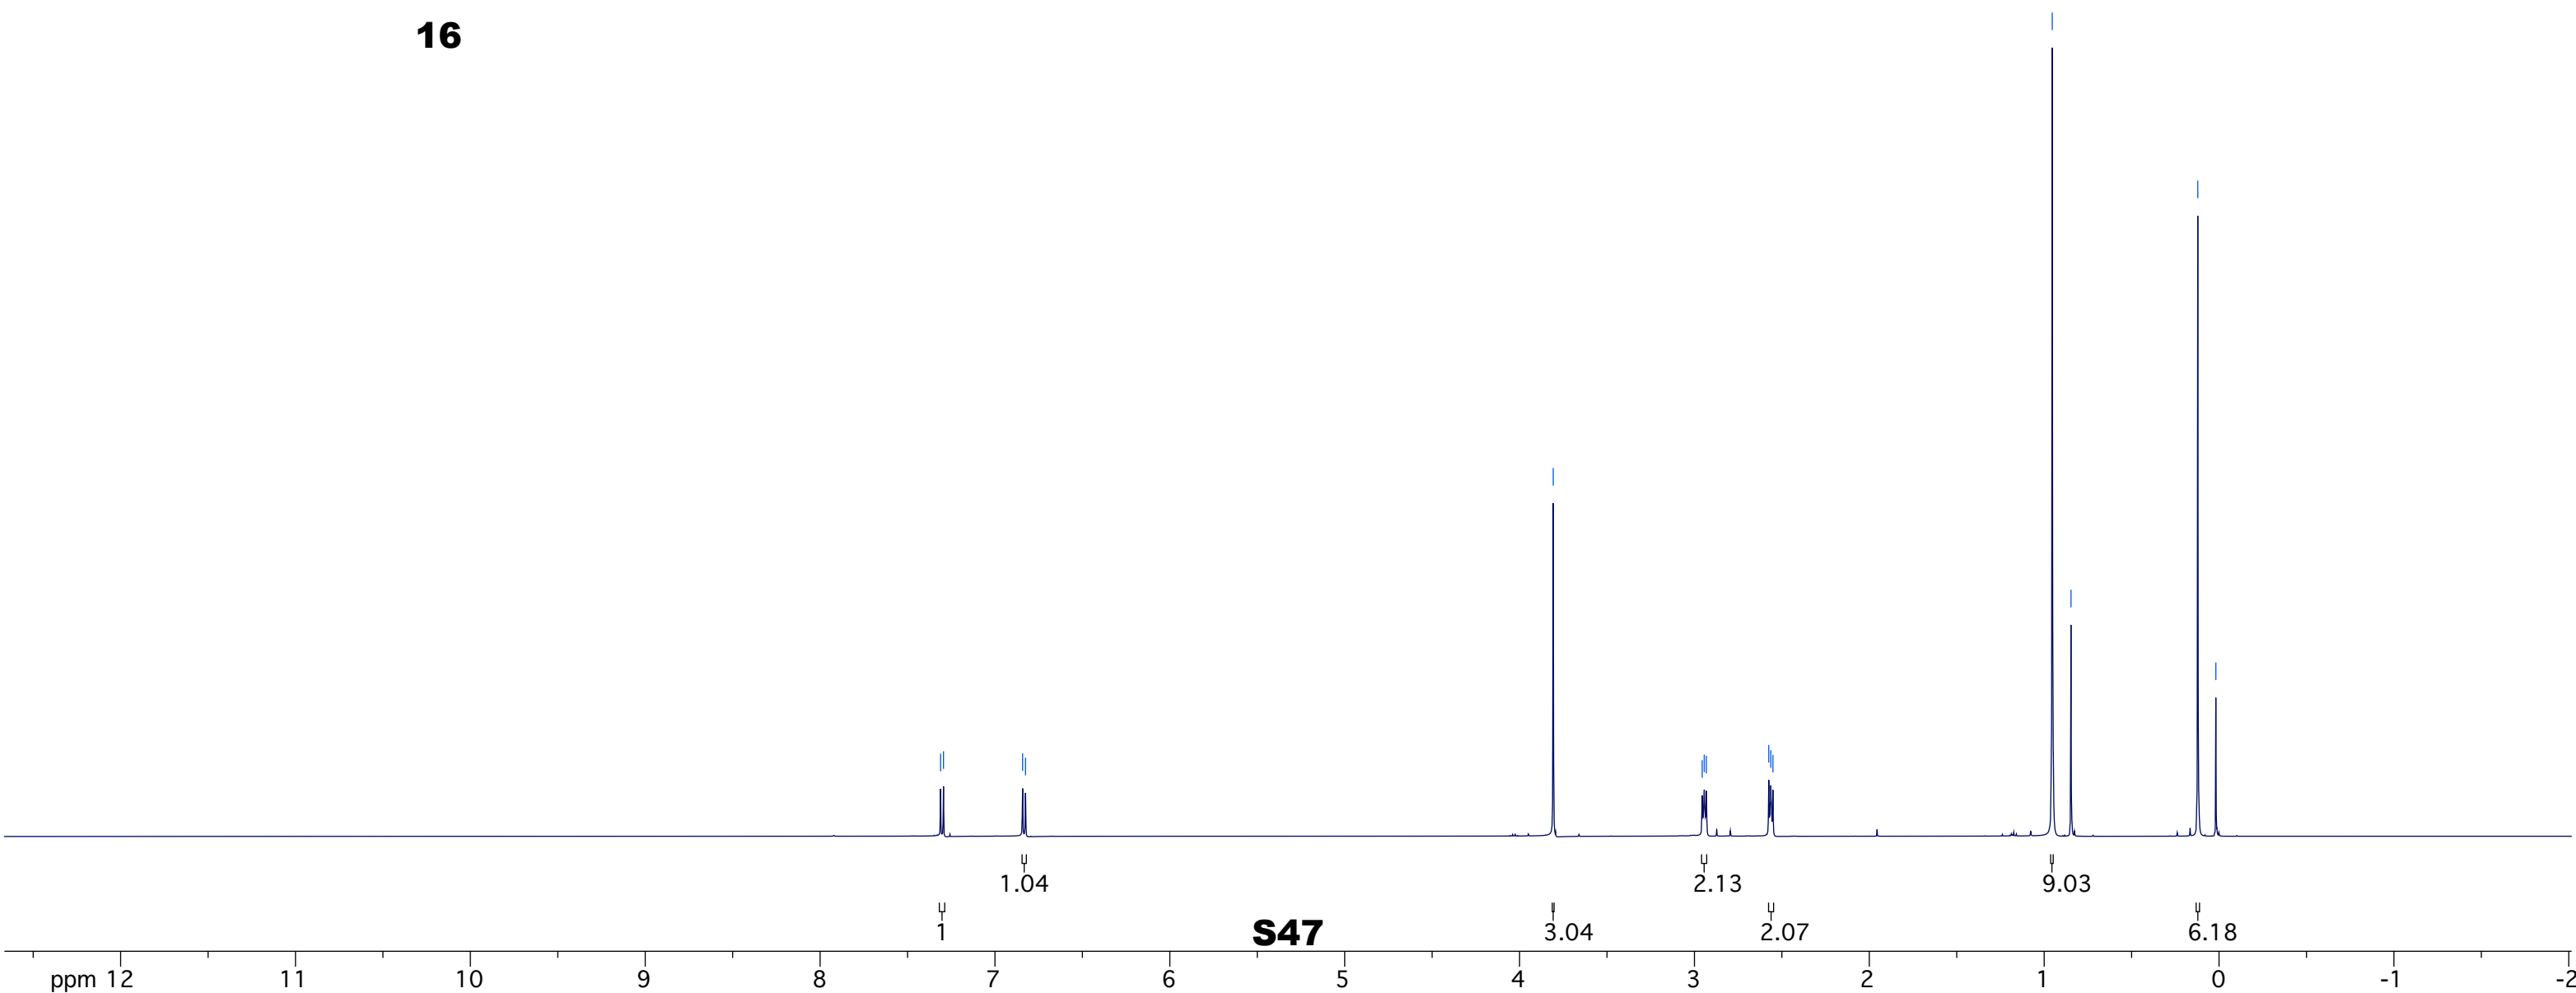

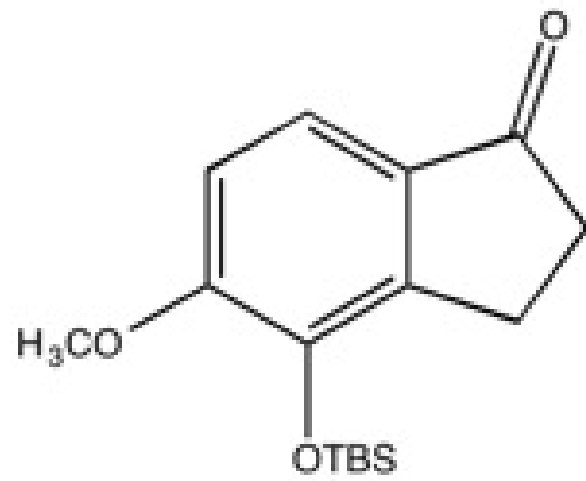

**16**

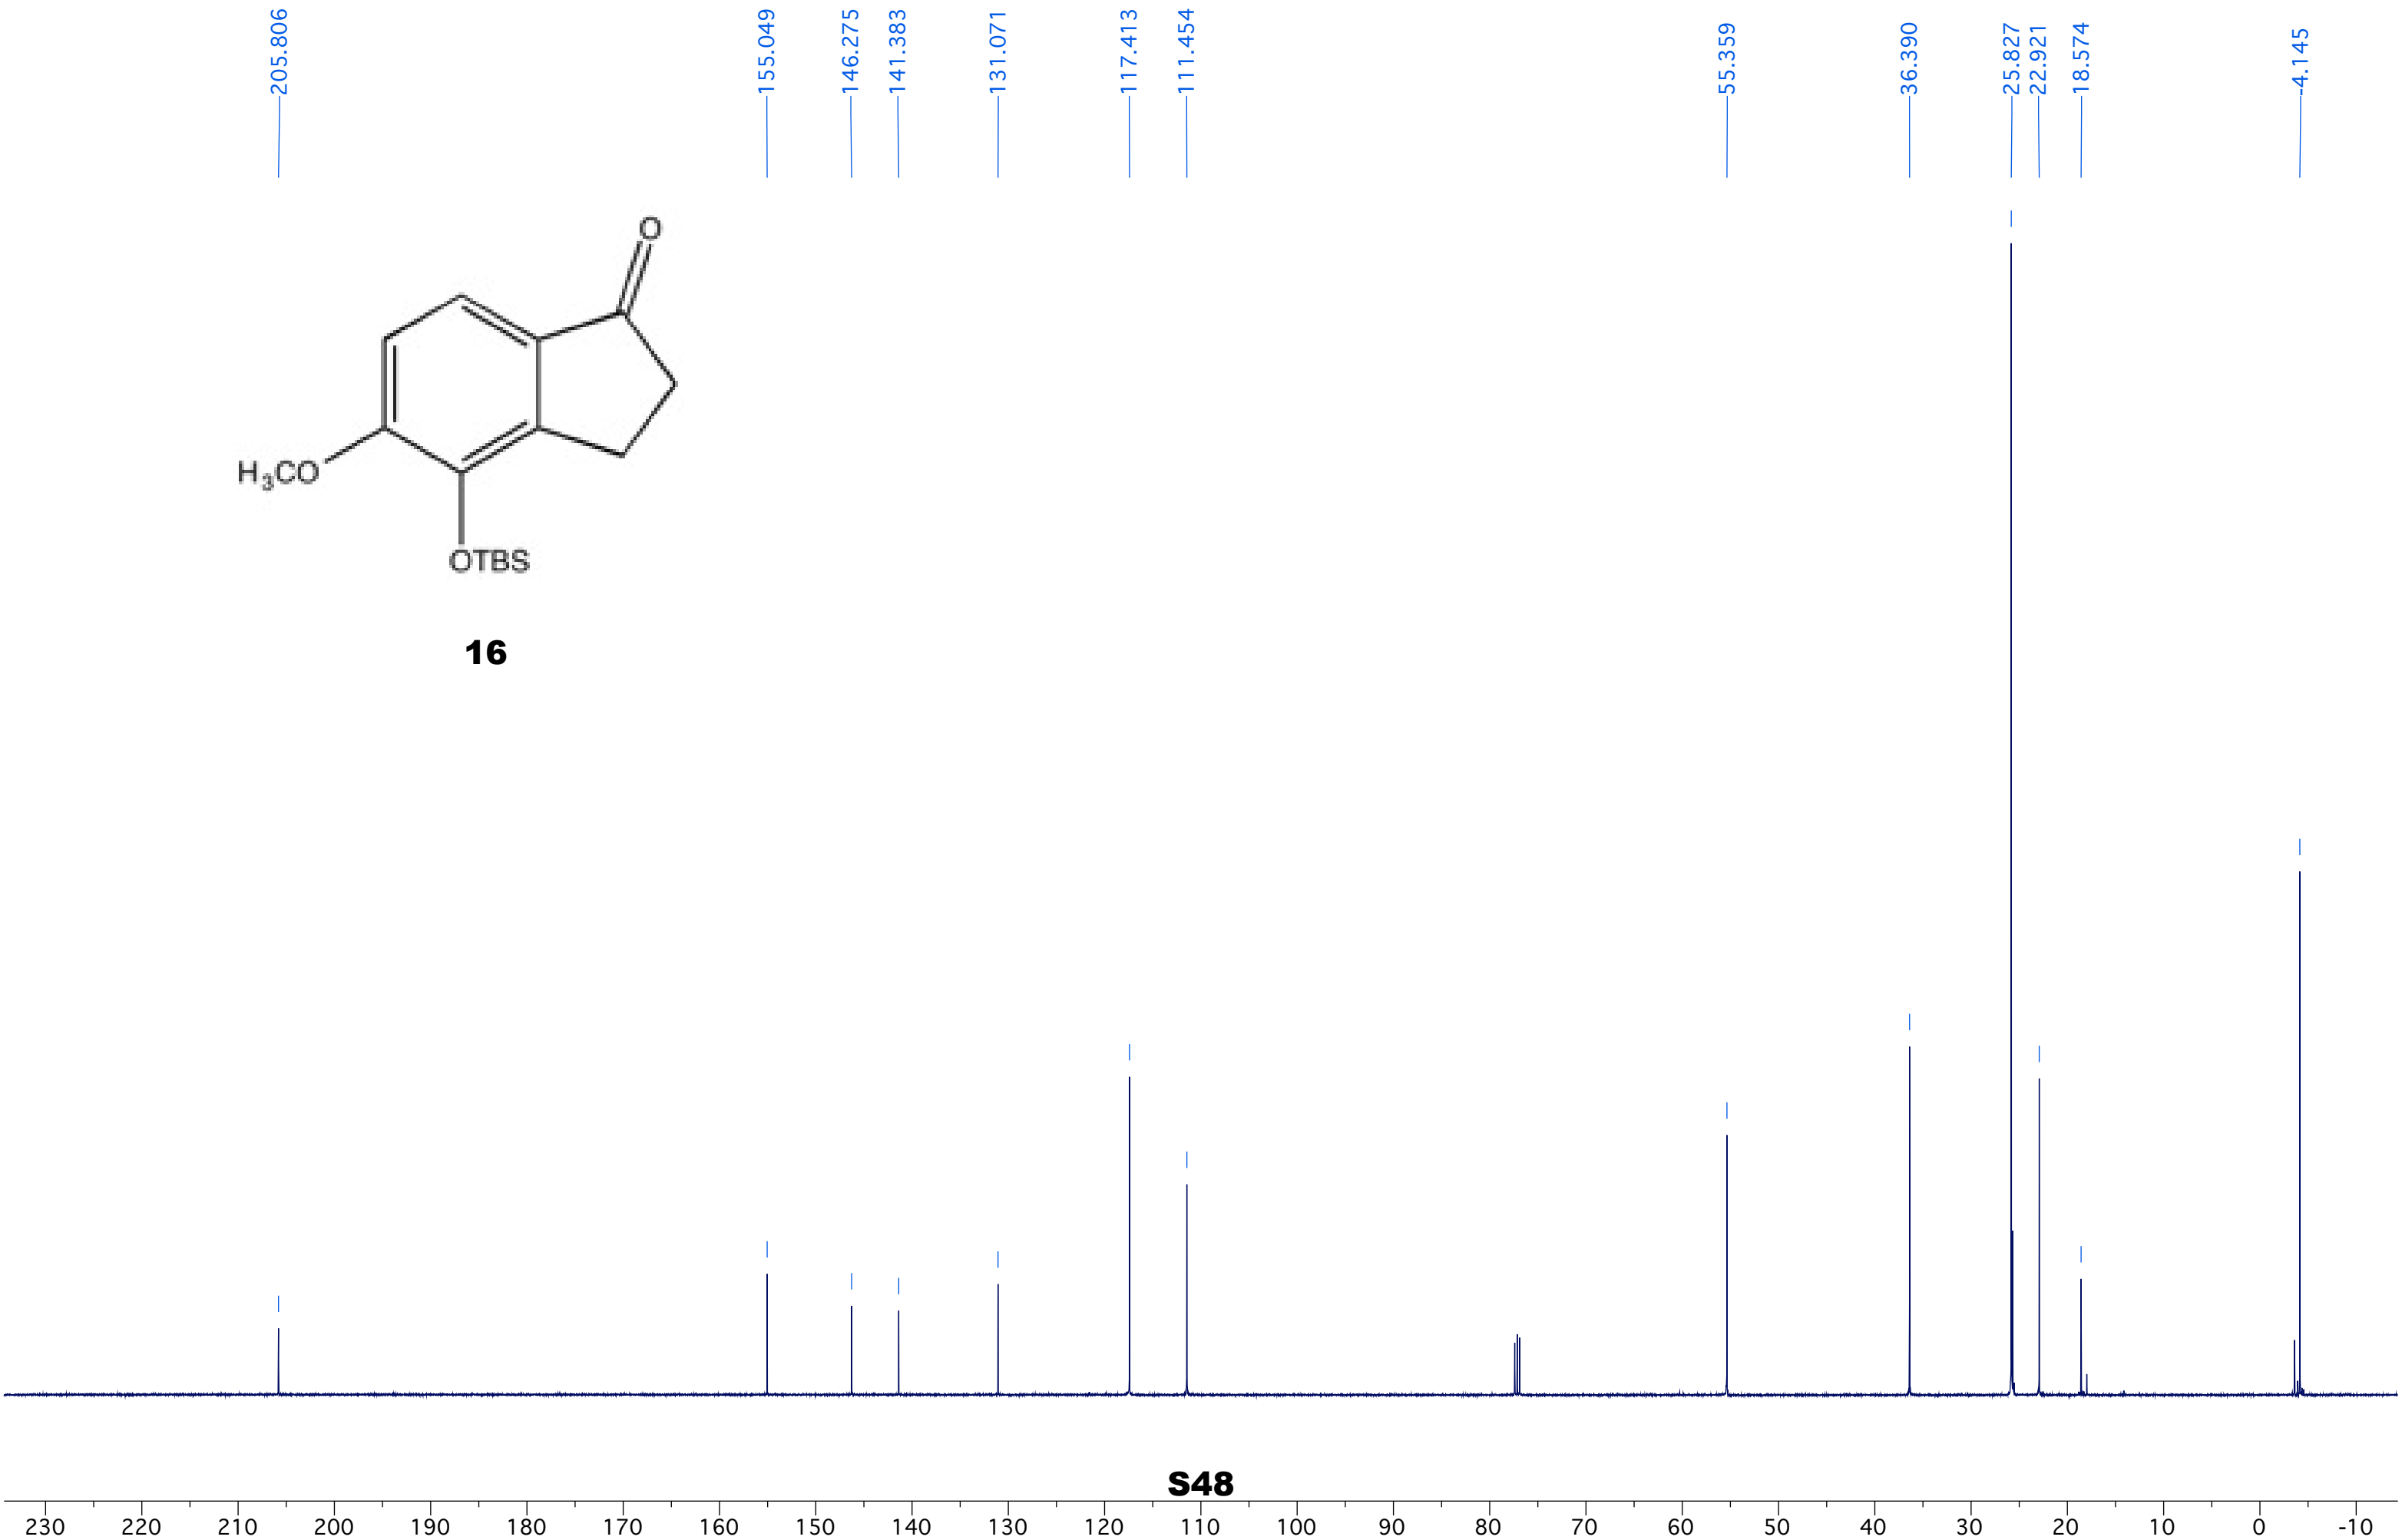



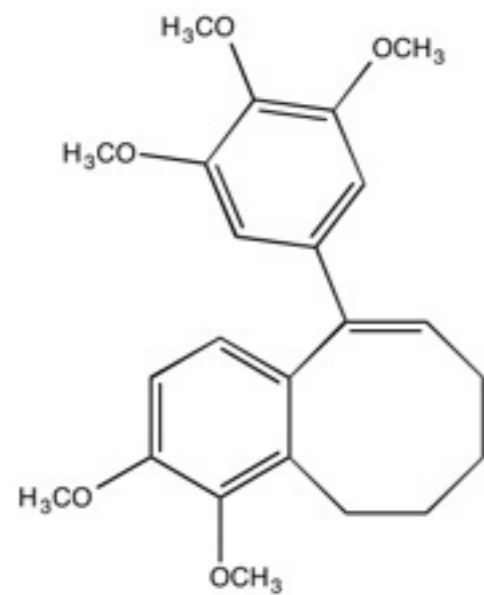

**20**

6.754  
6.737  
6.728  
6.711  
6.409  
6.223  
6.208  
6.205  
6.190

3.926  
3.880  
3.837  
3.780  
3.264  
3.248  
3.239  
3.223  
2.300  
2.284  
2.270  
2.258  
2.248  
2.224  
2.200  
2.074  
2.069  
2.052  
2.040  
1.785  
1.778  
1.765  
1.761  
1.749  
1.743  
1.689  
1.688  
1.647  
1.642  
1.622  
1.426  
1.418  
1.400  
1.393  
1.369  
1.353  
1.338  
1.331  
1.314  
1.306  
1.290  
1.280

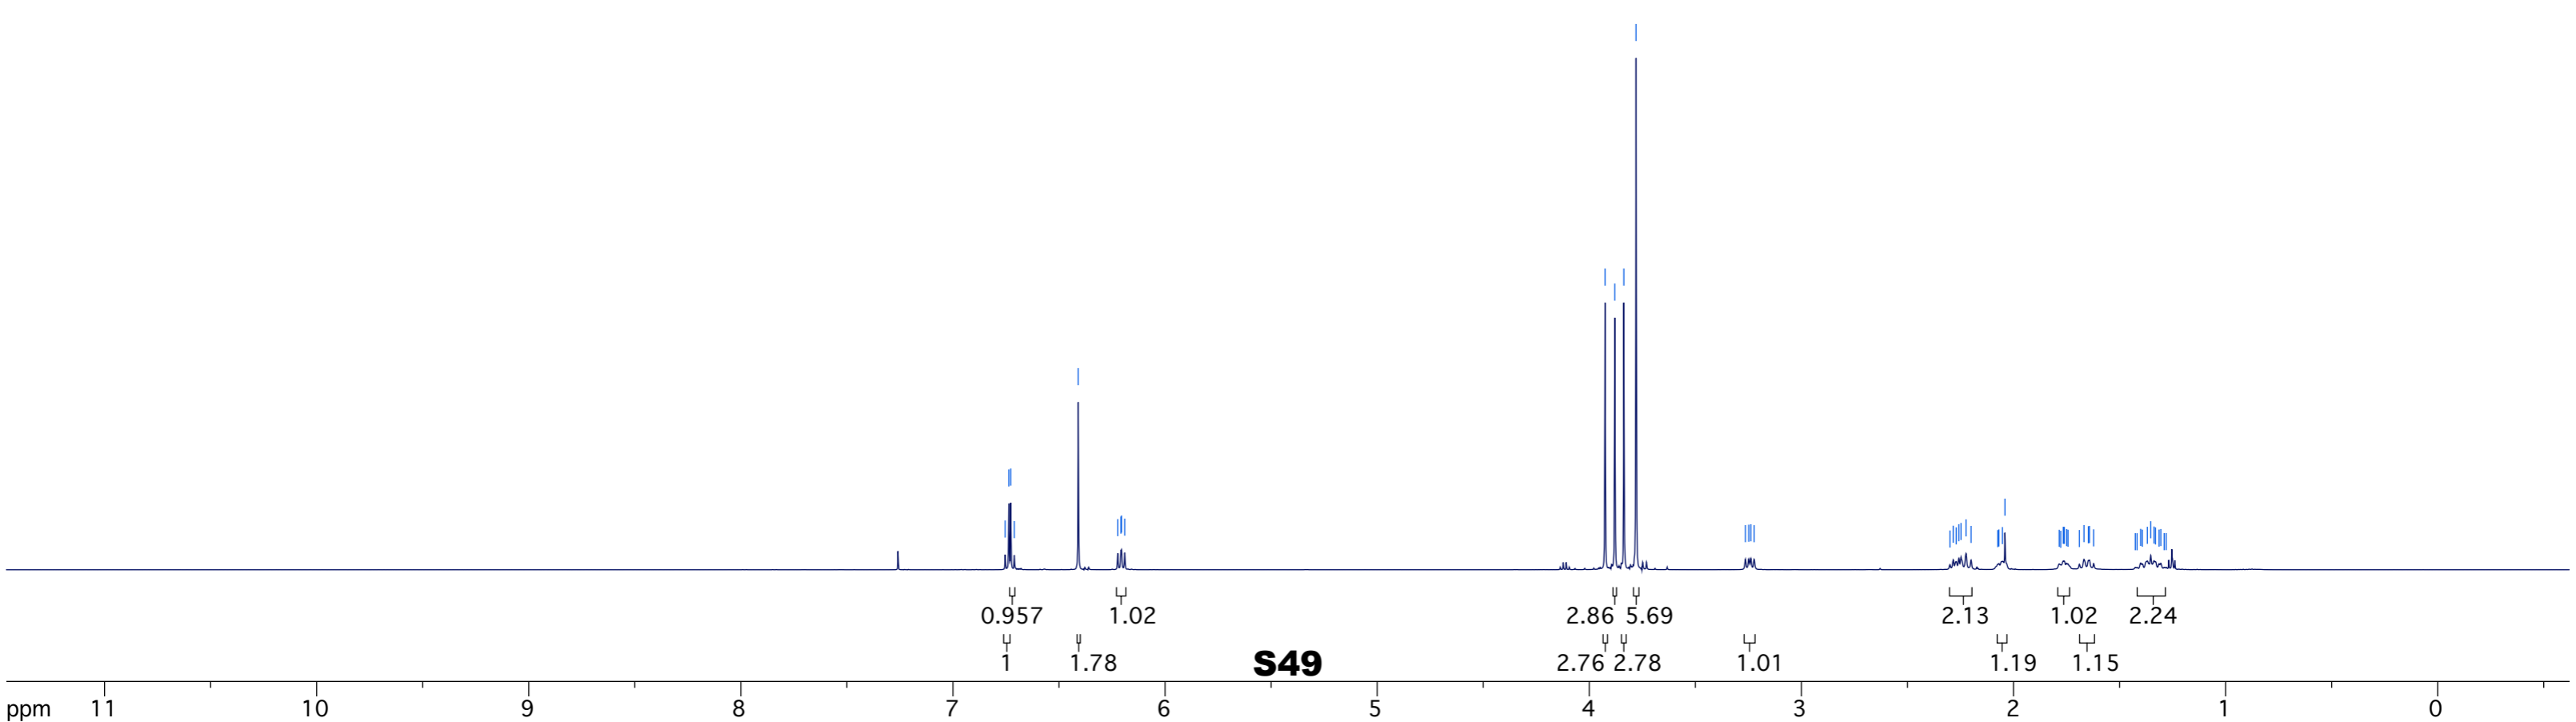

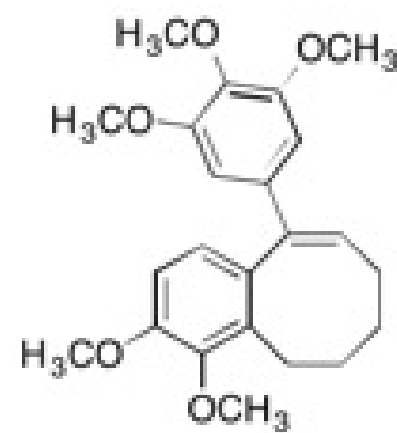

**20**

152.787  
151.823  
146.337  
139.702  
139.031  
137.543  
137.172  
131.899  
129.719  
124.765  
109.506  
104.672  
60.868  
60.716  
56.112  
55.551  
28.348  
27.838  
26.046  
24.621

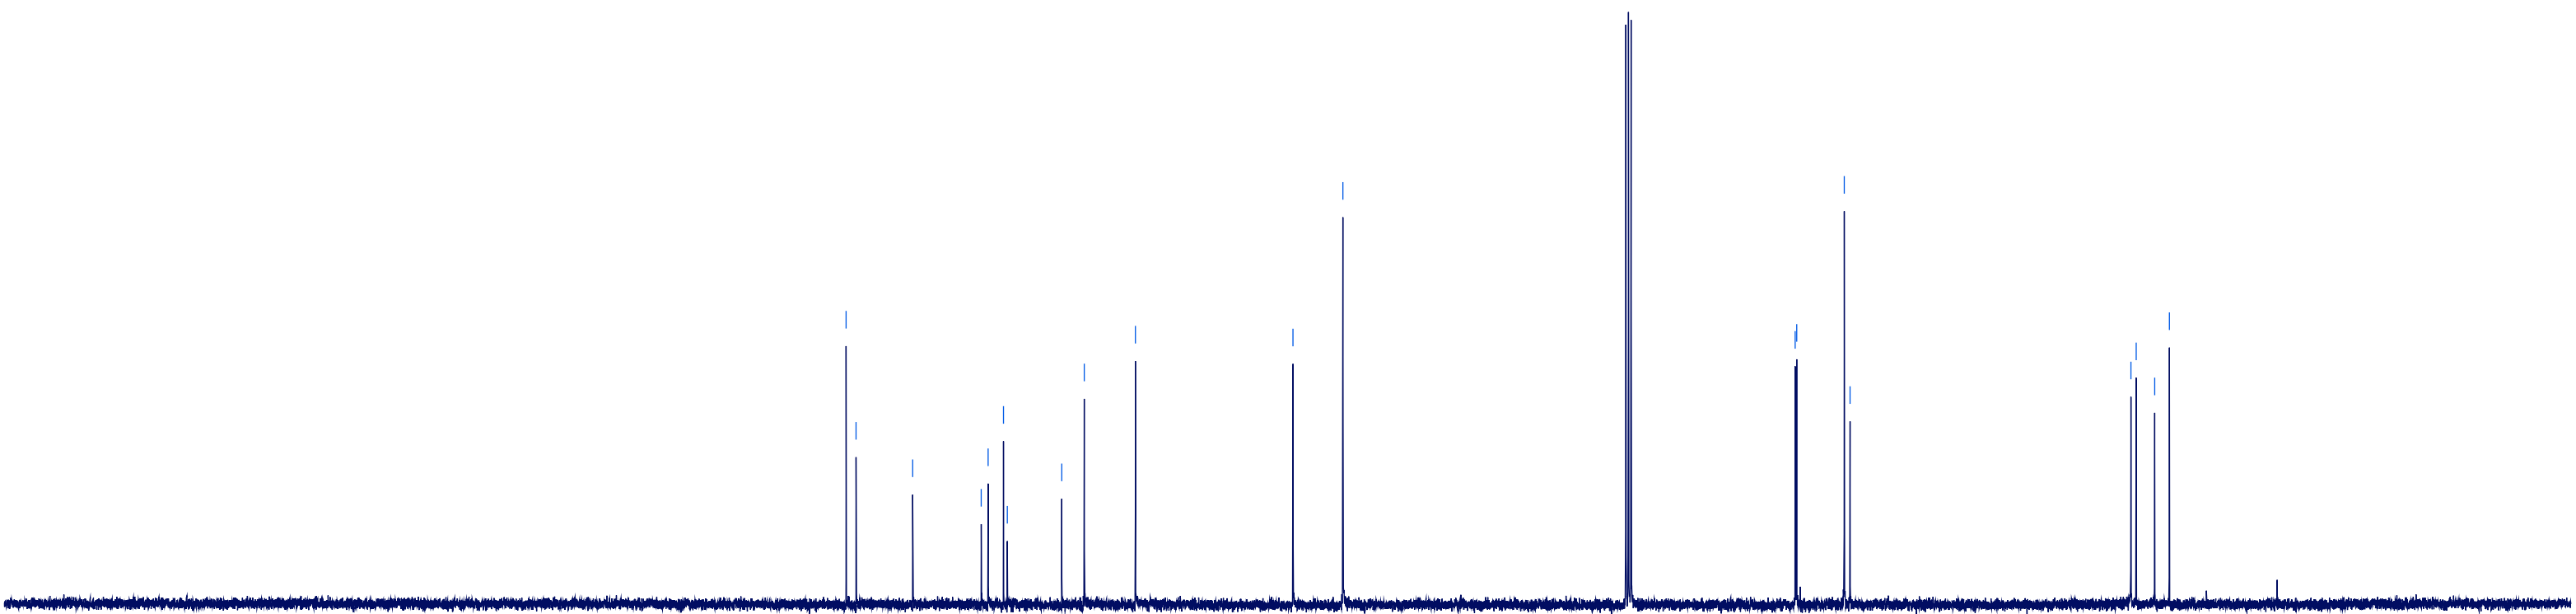

**S50**

230 220 210 200 190 180 170 160 150 140 130 120 110 100 90 80 70 60 50 40 30 20 10 0 -10

Sample Name: CAH\_4\_88

=====

Acq. Operator : Christine  
Acq. Instrument : Instrument 1 Location : -  
Injection Date : 9/23/2014 8:51:24 AM  
Acq. Method : C:\CHEM32\1\METHODS\MASTERMETHOD.M  
Last changed : 9/23/2014 8:17:01 AM by Christine  
Analysis Method : C:\CHEM32\1\DATA\CHRISTINE\CAH\_4\_88000001.D\DA.M (MASTERMETHOD.M)  
Last changed : 9/23/2014 9:45:13 AM by Christine

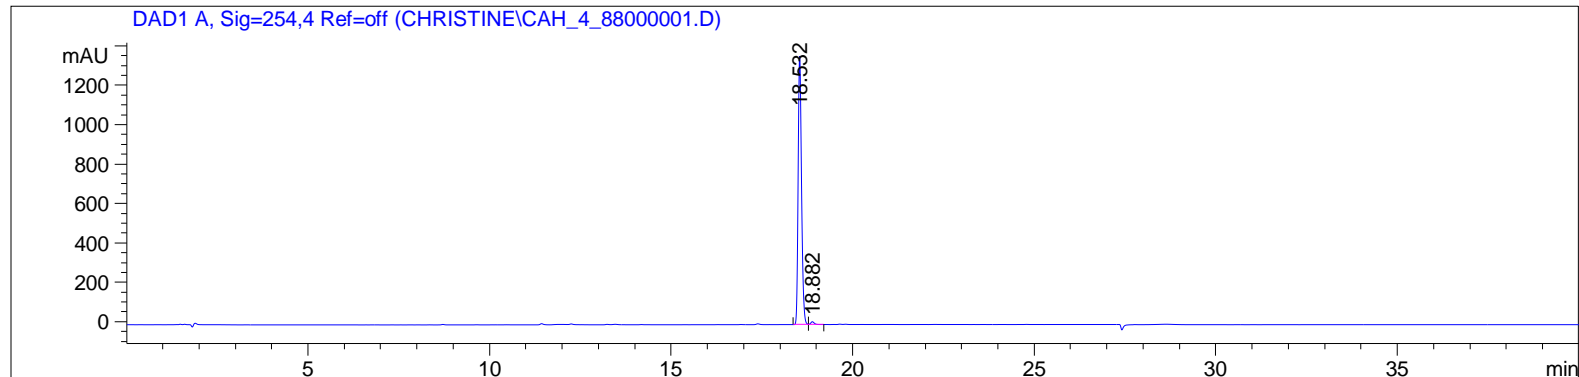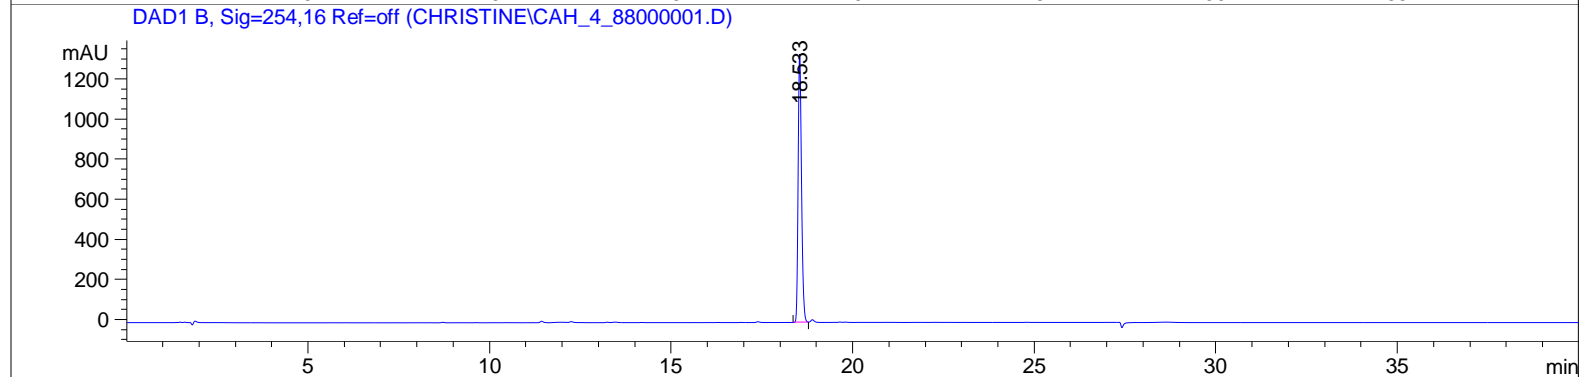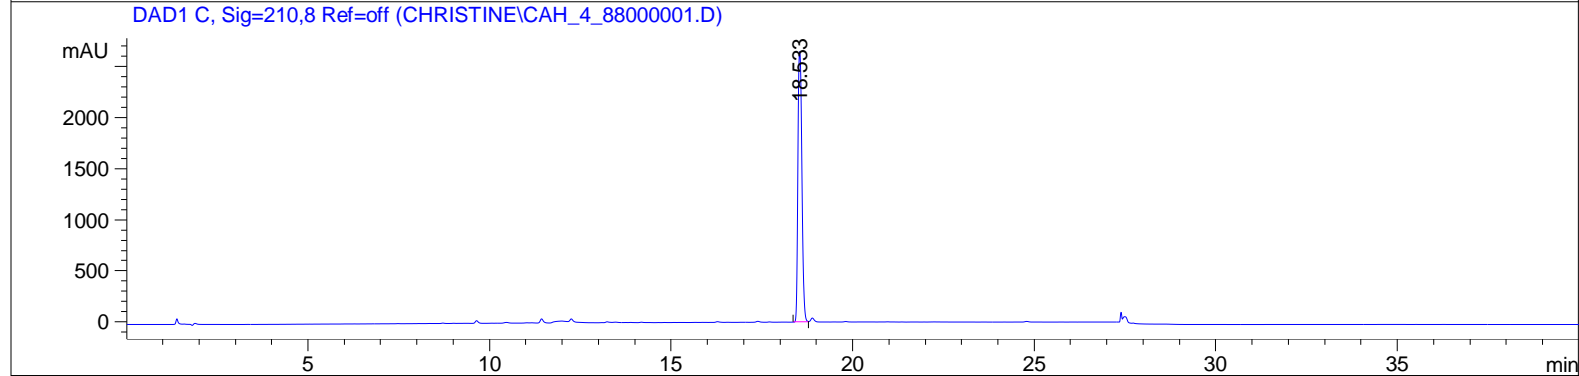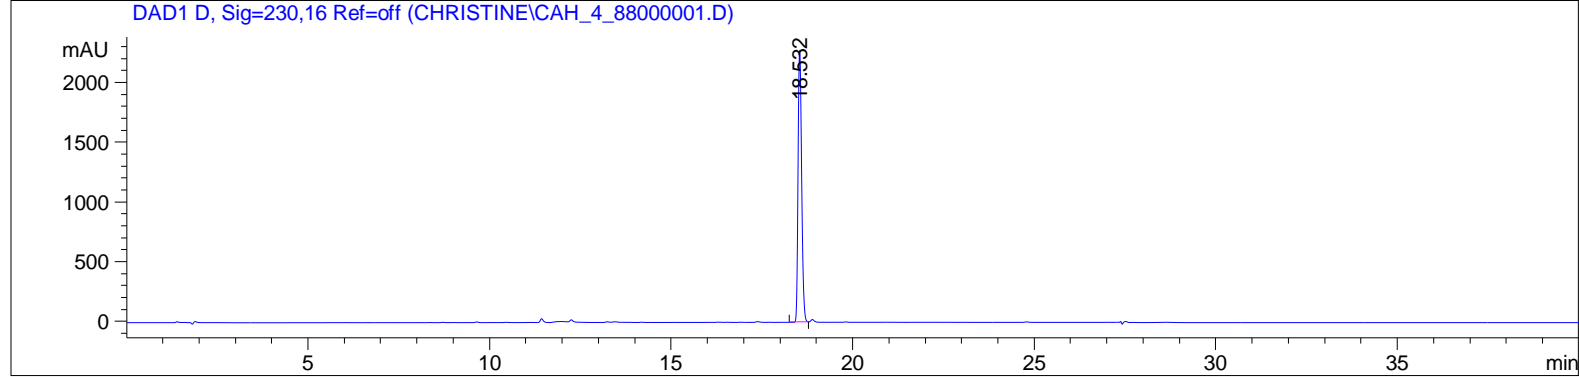

Sample Name: CAH\_4\_88

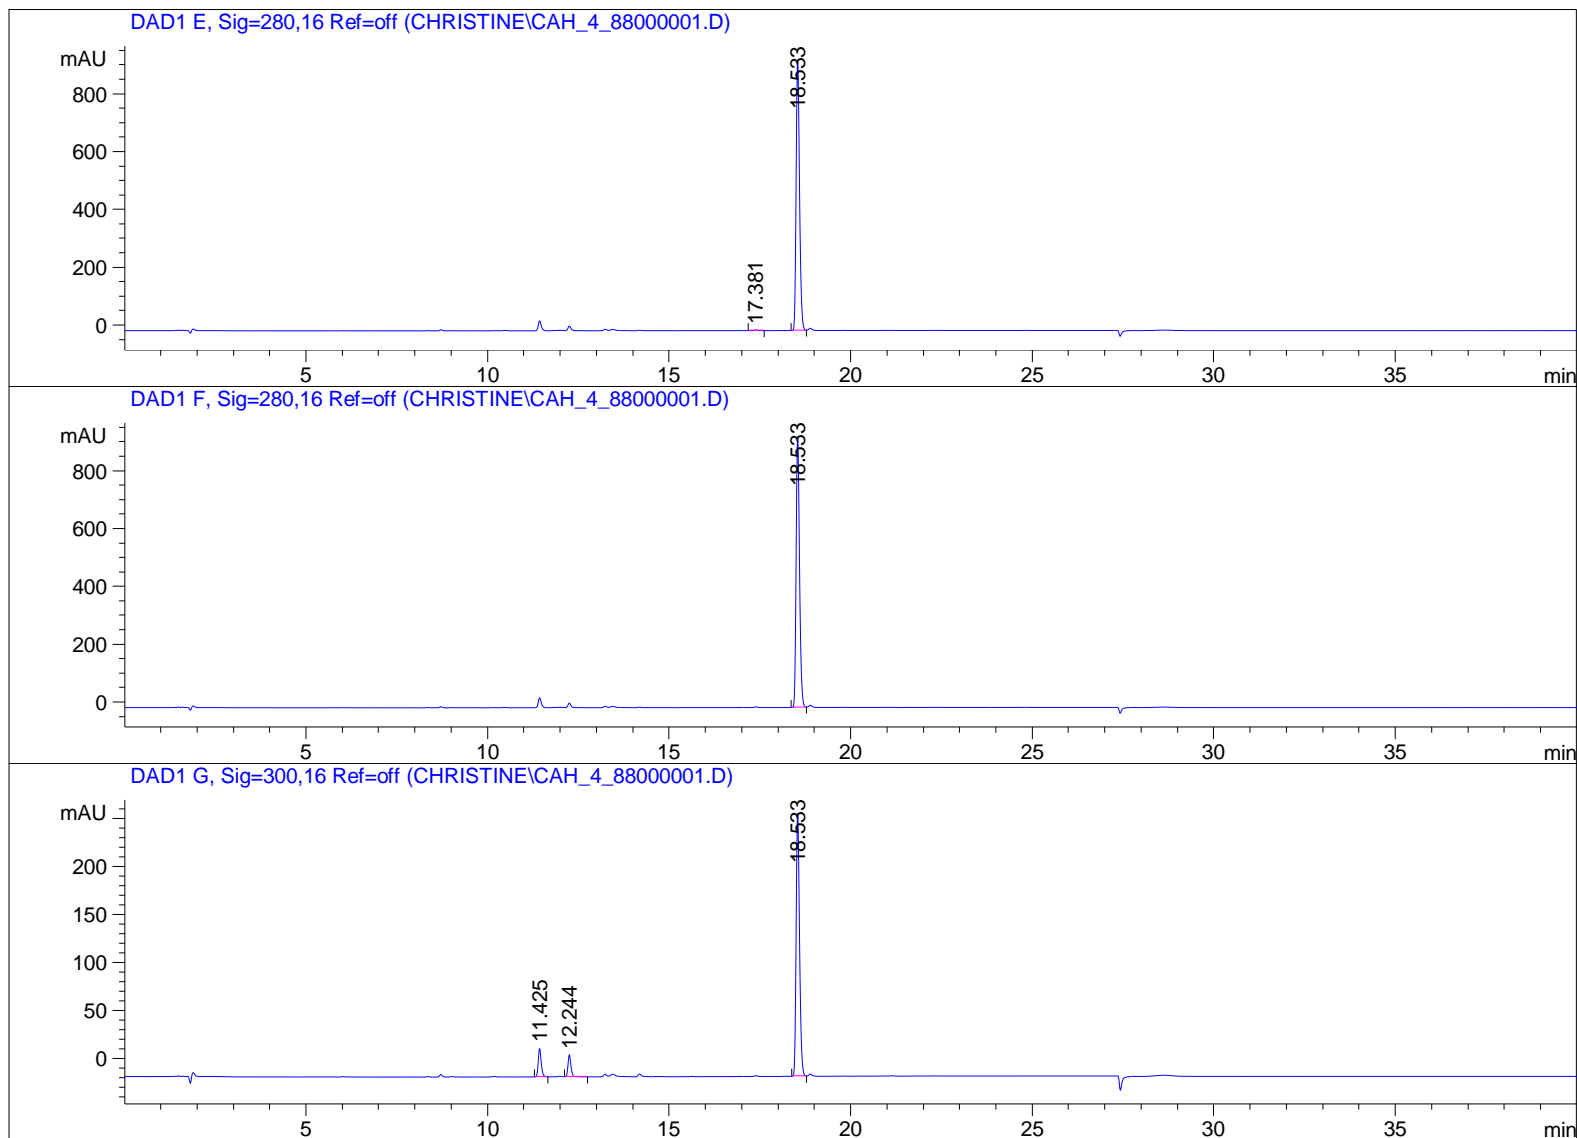

```
=====
                          Area Percent Report
=====
```

Sorted By : Signal  
Multiplier : 1.0000  
Dilution : 1.0000  
Use Multiplier & Dilution Factor with ISTDs

Signal 1: DAD1 A, Sig=254,4 Ref=off

| Peak # | RetTime [min] | Type | Width [min] | Area [mAU*s] | Height [mAU] | Area %  |
|--------|---------------|------|-------------|--------------|--------------|---------|
| 1      | 18.532        | BV   | 0.0995      | 8838.96289   | 1365.10266   | 98.9235 |
| 2      | 18.882        | VB   | 0.1004      | 96.18368     | 14.31833     | 1.0765  |

Totals : 8935.14657 1379.42099

Signal 2: DAD1 B, Sig=254,16 Ref=off

| Peak # | RetTime [min] | Type | Width [min] | Area [mAU*s] | Height [mAU] | Area %   |
|--------|---------------|------|-------------|--------------|--------------|----------|
| 1      | 18.533        | BV   | 0.0995      | 8683.92773   | 1341.87500   | 100.0000 |

Totals : 8683.92773 1341.87500

Signal 3: DAD1 C, Sig=210,8 Ref=off

| Peak # | RetTime [min] | Type | Width [min] | Area [mAU*s] | Height [mAU] | Area %   |
|--------|---------------|------|-------------|--------------|--------------|----------|
| 1      | 18.533        | BV   | 0.1233      | 2.02628e4    | 2646.86206   | 100.0000 |

Totals : 2.02628e4 2646.86206

Signal 4: DAD1 D, Sig=230,16 Ref=off

| Peak # | RetTime [min] | Type | Width [min] | Area [mAU*s] | Height [mAU] | Area %   |
|--------|---------------|------|-------------|--------------|--------------|----------|
| 1      | 18.532        | BV   | 0.1082      | 1.56791e4    | 2280.01855   | 100.0000 |

Totals : 1.56791e4 2280.01855

Signal 5: DAD1 E, Sig=280,16 Ref=off

| Peak # | RetTime [min] | Type | Width [min] | Area [mAU*s] | Height [mAU] | Area %  |
|--------|---------------|------|-------------|--------------|--------------|---------|
| 1      | 17.381        | BB   | 0.1023      | 16.08844     | 2.39759      | 0.2640  |
| 2      | 18.533        | BV   | 0.0995      | 6078.18750   | 939.42749    | 99.7360 |

Totals : 6094.27594 941.82508

Signal 6: DAD1 F, Sig=280,16 Ref=off

| Peak # | RetTime [min] | Type | Width [min] | Area [mAU*s] | Height [mAU] | Area %   |
|--------|---------------|------|-------------|--------------|--------------|----------|
| 1      | 18.533        | BV   | 0.0995      | 6078.18750   | 939.42749    | 100.0000 |

Sample Name: CAH\_4\_88

Totals : 6078.18750 939.42749

Signal 7: DAD1 G, Sig=300,16 Ref=off

| Peak # | RetTime [min] | Type | Width [min] | Area [mAU*s] | Height [mAU] | Area %  |
|--------|---------------|------|-------------|--------------|--------------|---------|
| 1      | 11.425        | BB   | 0.0866      | 167.73837    | 29.38750     | 8.0605  |
| 2      | 12.244        | VB   | 0.0884      | 130.17458    | 22.87446     | 6.2554  |
| 3      | 18.533        | BV   | 0.0998      | 1783.07324   | 274.61212    | 85.6840 |

Totals : 2080.98619 326.87408

=====  
\*\*\* End of Report \*\*\*

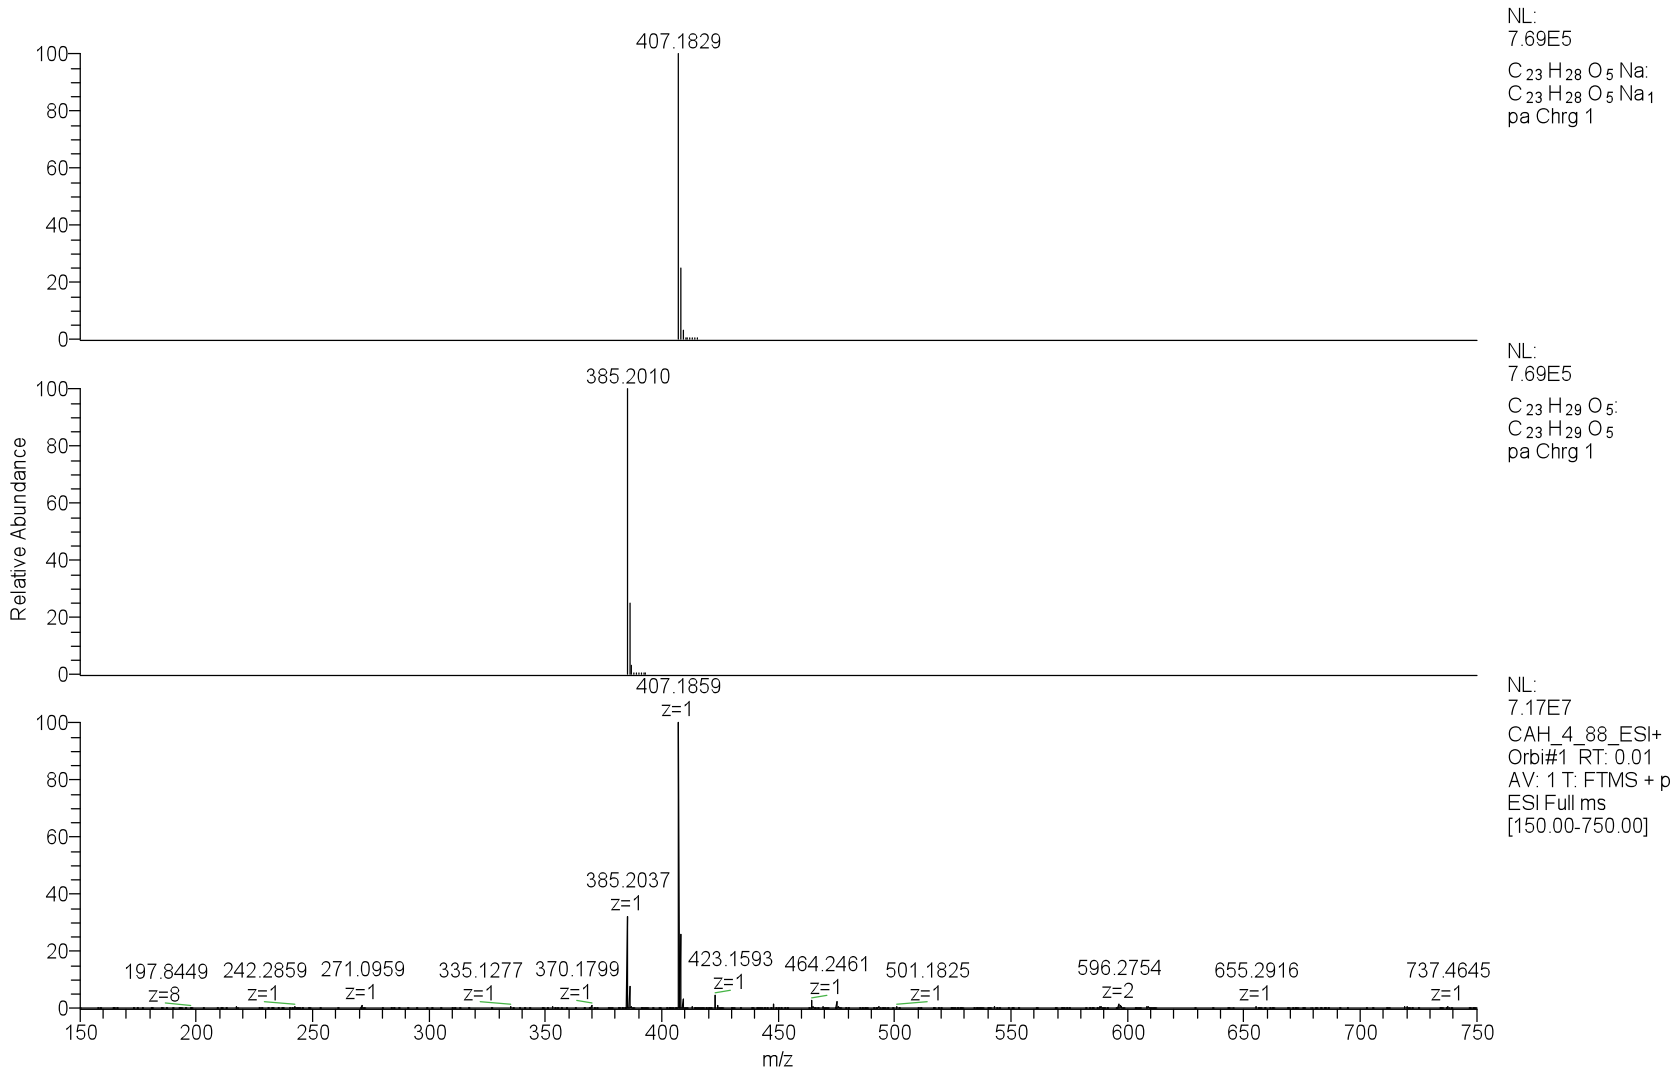

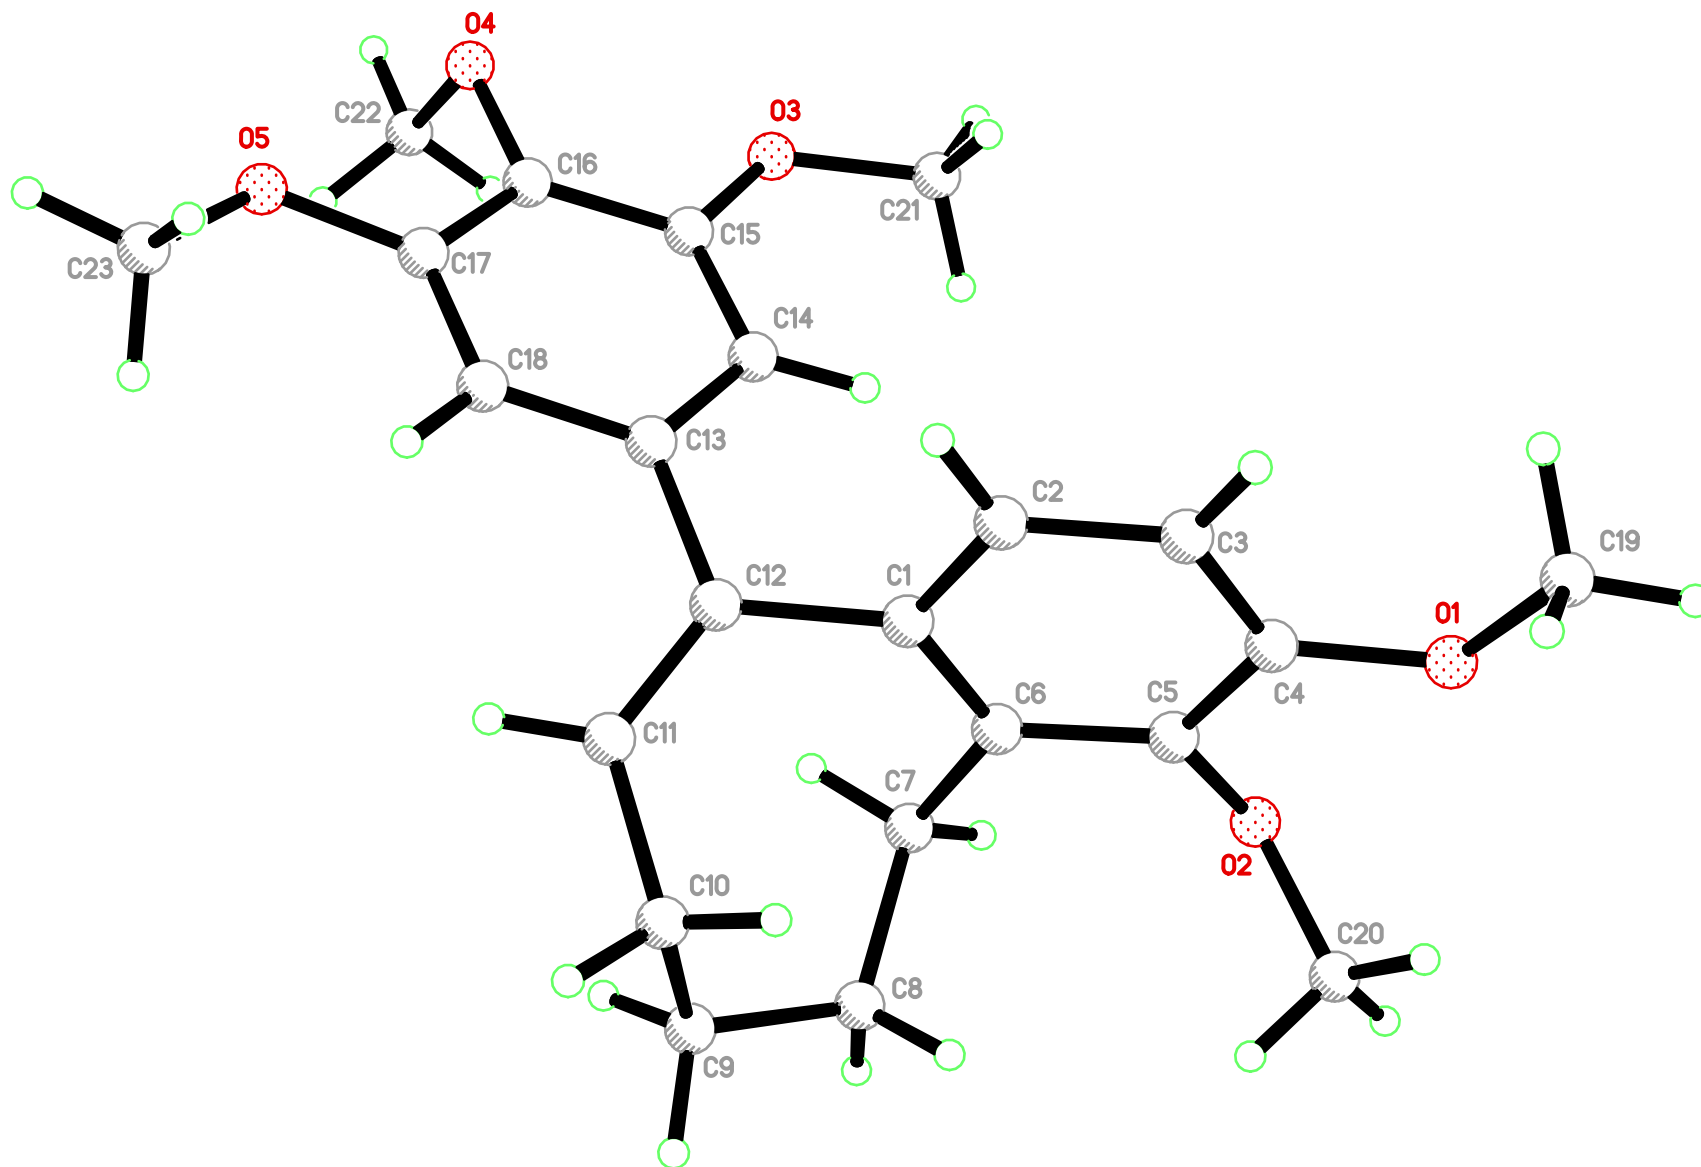

**S56**



## X-ray Crystallographic Analysis:

X-ray crystallographic analysis of compound **20**. Crystallographic data

were collected on a crystal of **20** with dimensions 0.257 x 0.138 x 0.039 mm<sup>3</sup>. Data

were collected at 150 K on a Bruker X8 Apex using Mo KR radiation ( $\lambda = 0.71073 \text{ \AA}$ ).

The structure was solved by direct methods after correction of the data using SADABS.

Crystallographic data and refinement details for the complex mentioned herein is found

in the Supporting Information (Table S1-S4). All data were processed using the Bruker

AXS SHELXTL software, version 6.10.

Table 1. Crystal data and structure refinement for Compound 20.

|                                 |                                                |                  |
|---------------------------------|------------------------------------------------|------------------|
| Identification code             | Compound 20                                    |                  |
| Empirical formula               | C <sub>23</sub> H <sub>28</sub> O <sub>5</sub> |                  |
| Formula weight                  | 384.45                                         |                  |
| Temperature                     | 150(2) K                                       |                  |
| Wavelength                      | 0.71073 Å                                      |                  |
| Crystal system                  | Monoclinic                                     |                  |
| Space group                     | P 21/c                                         |                  |
| Unit cell dimensions            | a = 11.7350(5) Å                               | a = 90°.         |
|                                 | b = 9.4232(5) Å                                | b = 102.544(2)°. |
|                                 | c = 18.5619(10) Å                              | g = 90°.         |
| Volume                          | 2003.60(17) Å <sup>3</sup>                     |                  |
| Z                               | 4                                              |                  |
| Density (calculated)            | 1.275 Mg/m <sup>3</sup>                        |                  |
| Absorption coefficient          | 0.089 mm <sup>-1</sup>                         |                  |
| F(000)                          | 824                                            |                  |
| Crystal size                    | 0.257 x 0.138 x 0.039 mm <sup>3</sup>          |                  |
| Theta range for data collection | 2.436 to 29.679°.                              |                  |
| Index ranges                    | -16<=h<=12, -12<=k<=13, -25<=l<=23             |                  |
| Reflections collected           | 13077                                          |                  |
| Independent reflections         | 5627 [R(int) = 0.0336]                         |                  |
| Completeness to theta = 25.242° | 99.3 %                                         |                  |
| Absorption correction           | Semi-empirical from equivalents                |                  |

|                                   |                                             |
|-----------------------------------|---------------------------------------------|
| Max. and min. transmission        | 0.902 and 0.885                             |
| Refinement method                 | Full-matrix least-squares on F <sup>2</sup> |
| Data / restraints / parameters    | 5627 / 0 / 253                              |
| Goodness-of-fit on F <sup>2</sup> | 1.025                                       |
| Final R indices [I>2sigma(I)]     | R1 = 0.0541, wR2 = 0.1131                   |
| R indices (all data)              | R1 = 0.0879, wR2 = 0.1267                   |
| Extinction coefficient            | n/a                                         |
| Largest diff. peak and hole       | 0.344 and -0.242 e.Å <sup>-3</sup>          |

Table 2. Atomic coordinates ( $\times 10^4$ ) and equivalent isotropic displacement parameters ( $\text{\AA}^2 \times 10^3$ ) for Compound 20.  $U(\text{eq})$  is defined as one third of the trace of the orthogonalized  $U^{ij}$  tensor.

|       | x       | y        | z       | U(eq) |
|-------|---------|----------|---------|-------|
| O(1)  | 3173(1) | 14383(1) | 4025(1) | 30(1) |
| O(2)  | 4861(1) | 13357(1) | 3412(1) | 29(1) |
| O(3)  | 857(1)  | 9497(1)  | 770(1)  | 28(1) |
| O(4)  | 251(1)  | 6770(1)  | 589(1)  | 23(1) |
| O(5)  | 819(1)  | 4899(1)  | 1700(1) | 27(1) |
| C(1)  | 3180(1) | 10093(2) | 3481(1) | 20(1) |
| C(2)  | 2272(1) | 10643(2) | 3767(1) | 23(1) |
| C(3)  | 2252(1) | 12049(2) | 3979(1) | 24(1) |
| C(4)  | 3134(1) | 12951(2) | 3878(1) | 22(1) |
| C(5)  | 4042(1) | 12422(2) | 3577(1) | 21(1) |
| C(6)  | 4094(1) | 10996(2) | 3387(1) | 19(1) |
| C(7)  | 5115(1) | 10470(2) | 3087(1) | 24(1) |
| C(8)  | 6151(1) | 9948(2)  | 3694(1) | 30(1) |
| C(9)  | 6098(1) | 8424(2)  | 3958(1) | 32(1) |
| C(10) | 4997(1) | 8045(2)  | 4242(1) | 28(1) |
| C(11) | 3994(1) | 7669(2)  | 3619(1) | 24(1) |
| C(12) | 3176(1) | 8564(2)  | 3272(1) | 21(1) |
| C(13) | 2289(1) | 8107(2)  | 2605(1) | 21(1) |
| C(14) | 1906(1) | 9084(2)  | 2043(1) | 21(1) |
| C(15) | 1226(1) | 8632(2)  | 1370(1) | 21(1) |
| C(16) | 907(1)  | 7212(2)  | 1263(1) | 20(1) |
| C(17) | 1222(1) | 6255(2)  | 1844(1) | 21(1) |
| C(18) | 1921(1) | 6696(2)  | 2514(1) | 22(1) |
| C(19) | 2327(2) | 14928(2) | 4397(1) | 36(1) |
| C(20) | 5700(1) | 13882(2) | 4028(1) | 35(1) |
| C(21) | 948(2)  | 10986(2) | 893(1)  | 32(1) |
| C(22) | 963(1)  | 6307(2)  | 95(1)   | 28(1) |
| C(23) | 1023(2) | 3932(2)  | 2307(1) | 36(1) |

Table 3. Bond lengths [Å] and angles [°] for Compound 20.

---

|                  |            |
|------------------|------------|
| O(1)-C(4)        | 1.3749(19) |
| O(1)-C(19)       | 1.4217(19) |
| O(2)-C(5)        | 1.3859(17) |
| O(2)-C(20)       | 1.426(2)   |
| O(3)-C(15)       | 1.3706(18) |
| O(3)-C(21)       | 1.4221(19) |
| O(4)-C(16)       | 1.3838(16) |
| O(4)-C(22)       | 1.4353(17) |
| O(5)-C(17)       | 1.3686(18) |
| O(5)-C(23)       | 1.428(2)   |
| C(1)-C(2)        | 1.390(2)   |
| C(1)-C(6)        | 1.410(2)   |
| C(1)-C(12)       | 1.492(2)   |
| C(2)-C(3)        | 1.384(2)   |
| C(3)-C(4)        | 1.384(2)   |
| C(4)-C(5)        | 1.399(2)   |
| C(5)-C(6)        | 1.394(2)   |
| C(6)-C(7)        | 1.5094(19) |
| C(7)-C(8)        | 1.547(2)   |
| C(8)-C(9)        | 1.523(2)   |
| C(9)-C(10)       | 1.539(2)   |
| C(10)-C(11)      | 1.5015(19) |
| C(11)-C(12)      | 1.334(2)   |
| C(12)-C(13)      | 1.4964(19) |
| C(13)-C(14)      | 1.392(2)   |
| C(13)-C(18)      | 1.397(2)   |
| C(14)-C(15)      | 1.3947(19) |
| C(15)-C(16)      | 1.392(2)   |
| C(16)-C(17)      | 1.393(2)   |
| C(17)-C(18)      | 1.3957(19) |
|                  |            |
| C(4)-O(1)-C(19)  | 117.05(13) |
| C(5)-O(2)-C(20)  | 115.76(12) |
| C(15)-O(3)-C(21) | 117.25(12) |

|                   |            |
|-------------------|------------|
| C(16)-O(4)-C(22)  | 112.51(10) |
| C(17)-O(5)-C(23)  | 116.68(12) |
| C(2)-C(1)-C(6)    | 119.28(14) |
| C(2)-C(1)-C(12)   | 120.02(13) |
| C(6)-C(1)-C(12)   | 120.69(12) |
| C(3)-C(2)-C(1)    | 121.86(13) |
| C(2)-C(3)-C(4)    | 119.33(13) |
| O(1)-C(4)-C(3)    | 124.69(13) |
| O(1)-C(4)-C(5)    | 115.74(13) |
| C(3)-C(4)-C(5)    | 119.51(14) |
| O(2)-C(5)-C(6)    | 119.14(12) |
| O(2)-C(5)-C(4)    | 119.07(14) |
| C(6)-C(5)-C(4)    | 121.62(13) |
| C(5)-C(6)-C(1)    | 118.33(12) |
| C(5)-C(6)-C(7)    | 119.47(13) |
| C(1)-C(6)-C(7)    | 122.20(14) |
| C(6)-C(7)-C(8)    | 113.40(12) |
| C(9)-C(8)-C(7)    | 116.92(13) |
| C(8)-C(9)-C(10)   | 115.17(13) |
| C(11)-C(10)-C(9)  | 111.52(13) |
| C(12)-C(11)-C(10) | 125.74(15) |
| C(11)-C(12)-C(1)  | 121.55(13) |
| C(11)-C(12)-C(13) | 121.10(14) |
| C(1)-C(12)-C(13)  | 117.06(12) |
| C(14)-C(13)-C(18) | 119.84(13) |
| C(14)-C(13)-C(12) | 118.93(13) |
| C(18)-C(13)-C(12) | 121.00(13) |
| C(13)-C(14)-C(15) | 119.92(14) |
| O(3)-C(15)-C(16)  | 115.38(12) |
| O(3)-C(15)-C(14)  | 124.30(14) |
| C(16)-C(15)-C(14) | 120.30(14) |
| O(4)-C(16)-C(15)  | 119.85(13) |
| O(4)-C(16)-C(17)  | 120.45(13) |
| C(15)-C(16)-C(17) | 119.67(12) |
| O(5)-C(17)-C(16)  | 115.50(12) |
| O(5)-C(17)-C(18)  | 124.35(13) |

|                   |            |
|-------------------|------------|
| C(16)-C(17)-C(18) | 120.14(14) |
| C(17)-C(18)-C(13) | 119.88(14) |

Symmetry transformations used to generate equivalent atoms:

Table 4. Anisotropic displacement parameters ( $\text{\AA}^2 \times 10^3$ ) for Compound 20. The anisotropic displacement factor exponent takes the form:  $-2p^2[ h^2 a^{*2}U^{11} + \dots + 2 h k a^* b^* U^{12} ]$

|       | $U^{11}$ | $U^{22}$ | $U^{33}$ | $U^{23}$ | $U^{13}$ | $U^{12}$ |
|-------|----------|----------|----------|----------|----------|----------|
| O(1)  | 34(1)    | 23(1)    | 36(1)    | -4(1)    | 14(1)    | 1(1)     |
| O(2)  | 33(1)    | 28(1)    | 29(1)    | -2(1)    | 14(1)    | -12(1)   |
| O(3)  | 35(1)    | 24(1)    | 20(1)    | 0(1)     | -4(1)    | 0(1)     |
| O(4)  | 18(1)    | 30(1)    | 19(1)    | -8(1)    | -1(1)    | 0(1)     |
| O(5)  | 29(1)    | 22(1)    | 26(1)    | -4(1)    | 0(1)     | -6(1)    |
| C(1)  | 20(1)    | 24(1)    | 14(1)    | 1(1)     | 0(1)     | -3(1)    |
| C(2)  | 18(1)    | 30(1)    | 21(1)    | 0(1)     | 2(1)     | -6(1)    |
| C(3)  | 18(1)    | 30(1)    | 22(1)    | -1(1)    | 4(1)     | 0(1)     |
| C(4)  | 24(1)    | 22(1)    | 20(1)    | -1(1)    | 3(1)     | 1(1)     |
| C(5)  | 20(1)    | 24(1)    | 18(1)    | 2(1)     | 4(1)     | -4(1)    |
| C(6)  | 19(1)    | 24(1)    | 14(1)    | 0(1)     | 2(1)     | -1(1)    |
| C(7)  | 24(1)    | 26(1)    | 24(1)    | -2(1)    | 9(1)     | -2(1)    |
| C(8)  | 19(1)    | 34(1)    | 37(1)    | -3(1)    | 5(1)     | -2(1)    |
| C(9)  | 23(1)    | 35(1)    | 33(1)    | -2(1)    | -3(1)    | 3(1)     |
| C(10) | 28(1)    | 28(1)    | 23(1)    | 3(1)     | -4(1)    | -2(1)    |
| C(11) | 27(1)    | 23(1)    | 21(1)    | -1(1)    | 0(1)     | -5(1)    |
| C(12) | 21(1)    | 24(1)    | 17(1)    | -1(1)    | 2(1)     | -6(1)    |
| C(13) | 18(1)    | 25(1)    | 18(1)    | -4(1)    | 2(1)     | -2(1)    |
| C(14) | 21(1)    | 21(1)    | 20(1)    | -3(1)    | 2(1)     | -2(1)    |
| C(15) | 19(1)    | 25(1)    | 18(1)    | -1(1)    | 2(1)     | 1(1)     |
| C(16) | 16(1)    | 25(1)    | 18(1)    | -6(1)    | 1(1)     | 0(1)     |
| C(17) | 18(1)    | 20(1)    | 24(1)    | -5(1)    | 4(1)     | -2(1)    |
| C(18) | 22(1)    | 24(1)    | 20(1)    | -1(1)    | 1(1)     | -2(1)    |
| C(19) | 39(1)    | 33(1)    | 39(1)    | -10(1)   | 14(1)    | 5(1)     |
| C(20) | 29(1)    | 34(1)    | 42(1)    | -8(1)    | 10(1)    | -12(1)   |
| C(21) | 40(1)    | 24(1)    | 27(1)    | 0(1)     | -2(1)    | 0(1)     |

|       |       |       |       |       |      |        |
|-------|-------|-------|-------|-------|------|--------|
| C(22) | 27(1) | 34(1) | 23(1) | -8(1) | 6(1) | -2(1)  |
| C(23) | 52(1) | 24(1) | 30(1) | 0(1)  | 3(1) | -11(1) |

---

Crystallographic data for structure **20** (deposition number CCDC 1046343) reported in this paper have been deposited with the Cambridge Crystallographic Data Centre. Copies of the data can be obtained, free of charge, on application to the Director, CCDC, 12 Union Road, Cambridge CB2 1EZ, UK (fax: +44-(0) 1223-336033 or e-mail: [deposit@ccdc.cam.ac.uk](mailto:deposit@ccdc.cam.ac.uk)).

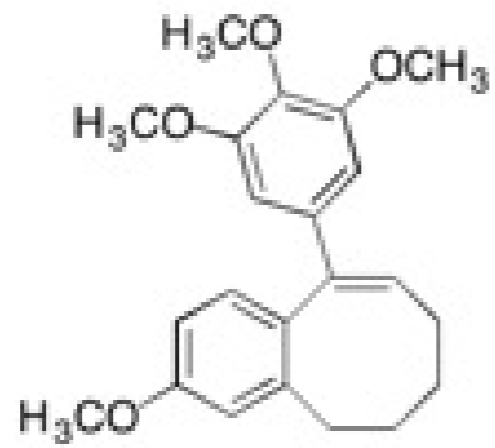

**21**

6.959  
6.945  
6.850  
6.846  
6.742  
6.738  
6.728  
6.724  
6.444  
6.256  
6.243  
6.241  
6.228

3.863  
3.857  
3.798  
2.849  
2.836  
2.827  
2.815  
2.581  
2.560  
2.541  
2.320  
2.307  
2.297  
2.295  
2.285  
2.272  
2.082  
2.078  
2.065  
2.063  
2.057  
2.050  
1.820  
1.813  
1.804  
1.800  
1.791  
1.786  
1.670  
1.652  
1.635  
1.614  
1.456  
1.448  
1.435  
1.428  
1.414  
1.407  
1.393  
1.387  
1.376  
1.369  
1.355  
1.349  
1.335  
1.328  
1.315  
1.306

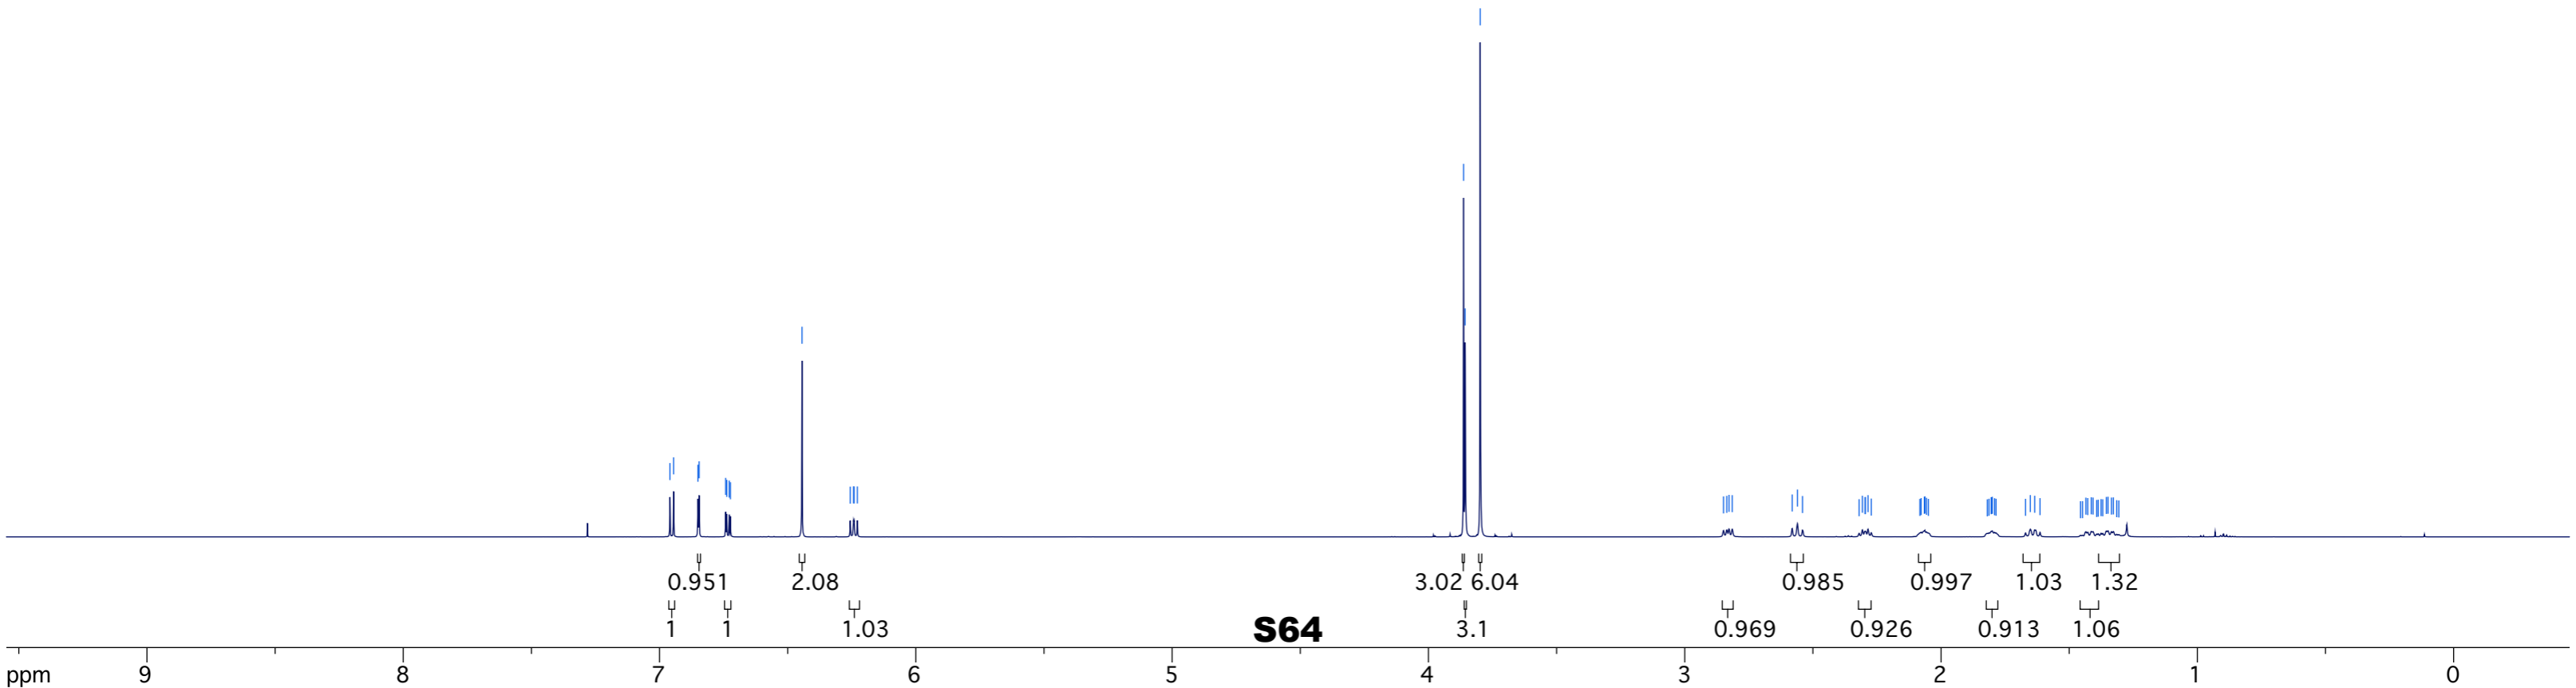



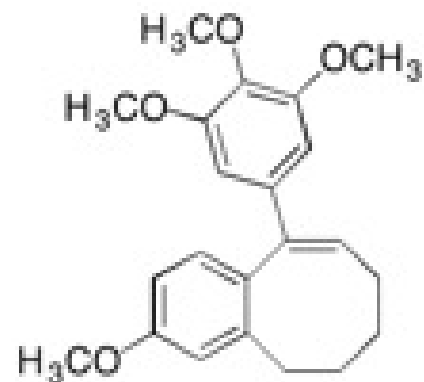

**21**

159.008  
152.836  
144.643  
139.684  
139.026  
137.149  
130.740  
130.603  
129.293  
114.008  
111.420  
104.627  
60.919  
56.101  
55.169  
33.458  
28.798  
28.287  
24.911

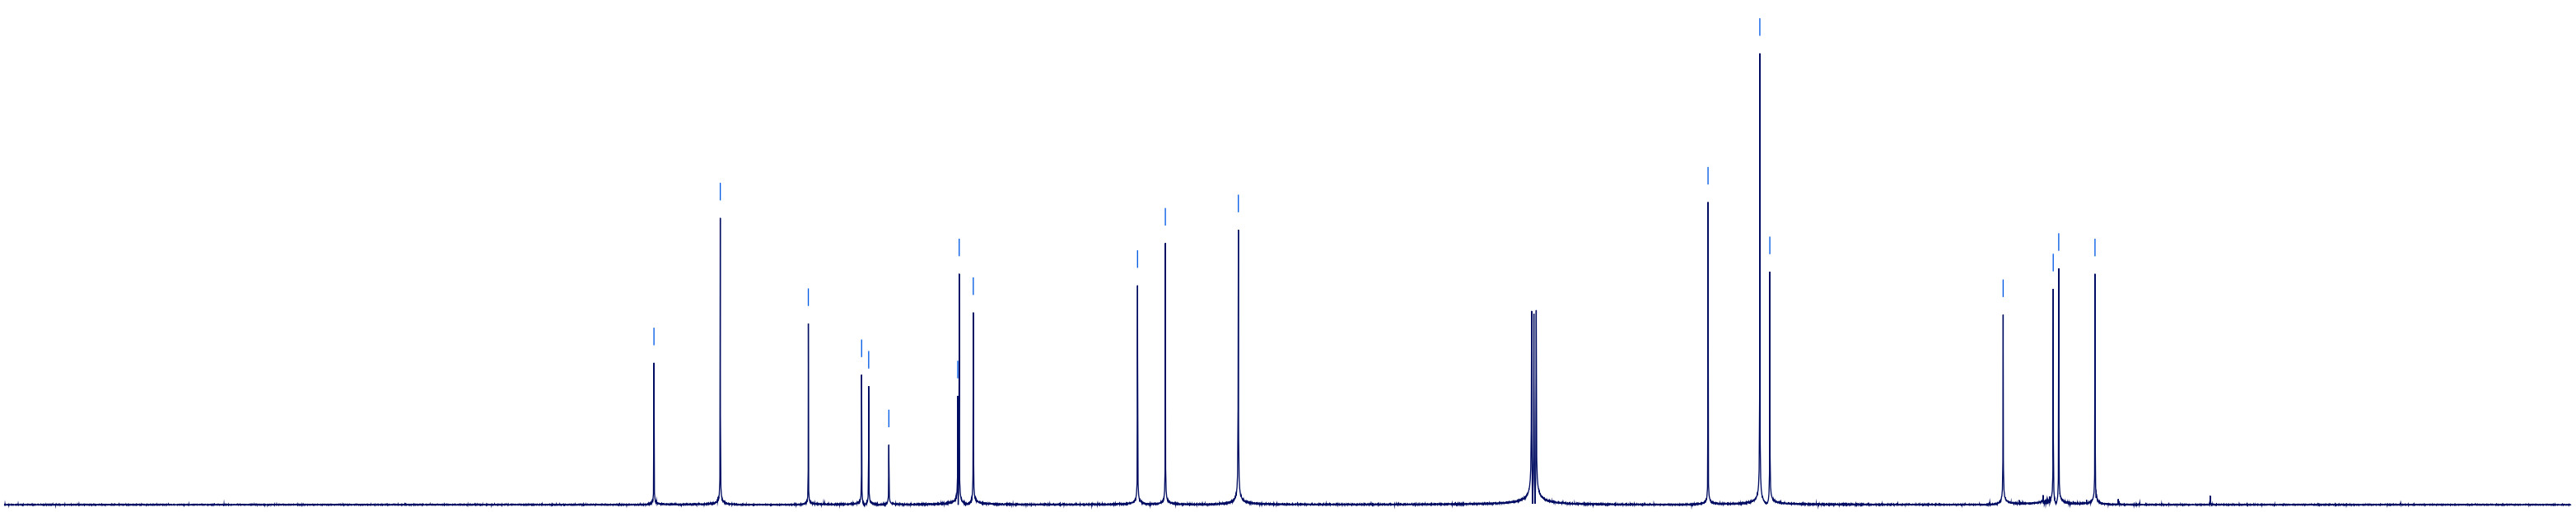

**S65**

ppm 210 200 190 180 170 160 150 140 130 120 110 100 90 80 70 60 50 40 30 20 10 0 -10

Sample Name: CAH\_5\_67

=====  
Acq. Operator : Christine  
Acq. Instrument : Instrument 1 Location : -  
Injection Date : 5/26/2015 12:50:47 PM  
Acq. Method : C:\CHEM32\1\METHODS\MASTERMETHOD.M  
Last changed : 5/26/2015 12:40:08 PM by Christine  
Analysis Method : C:\CHEM32\1\DATA\CHRISTINE\CAH\_5\_6700001.D\DA.M (MASTERMETHOD.M)  
Last changed : 5/26/2015 1:41:02 PM by Christine

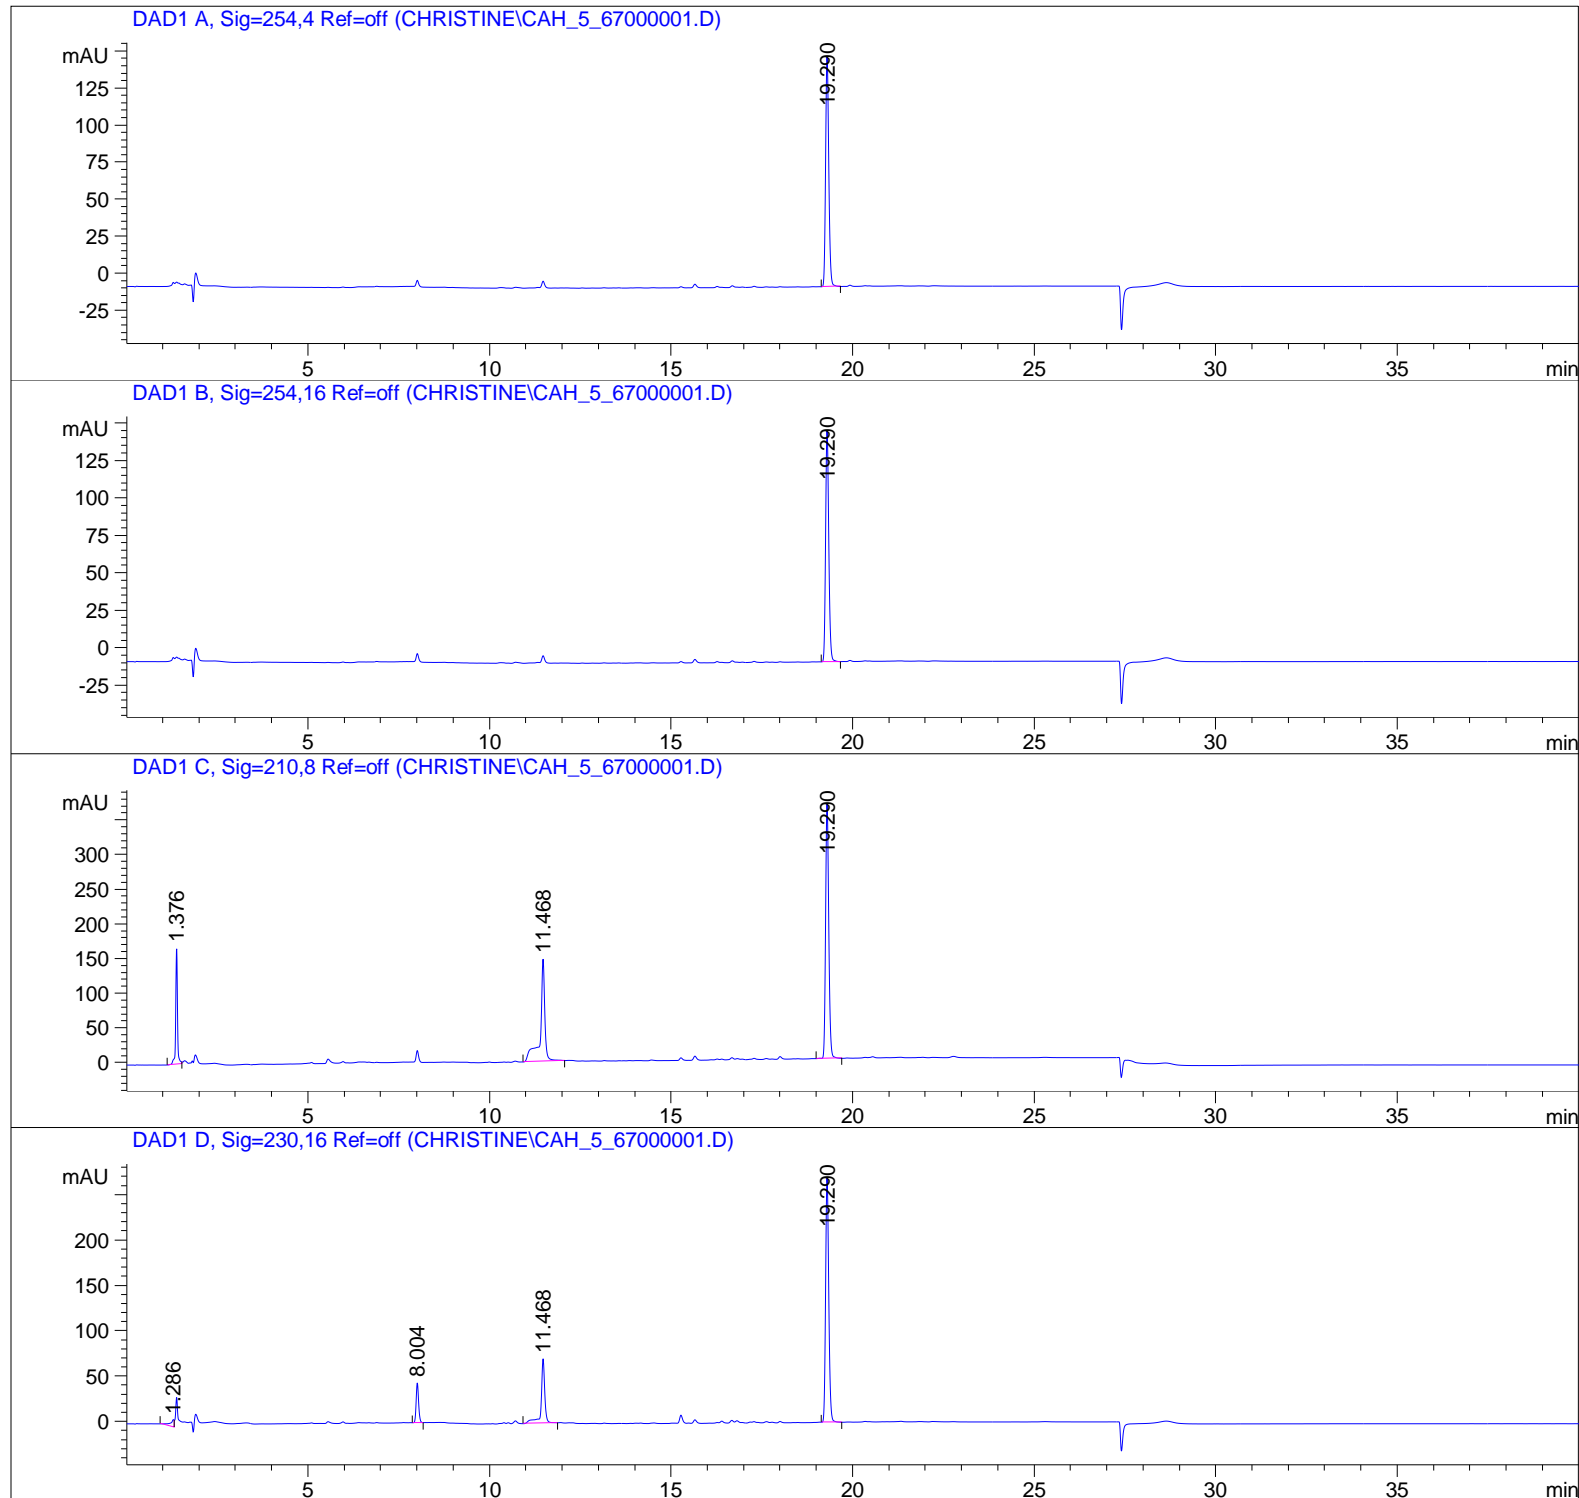

Sample Name: CAH\_5\_67

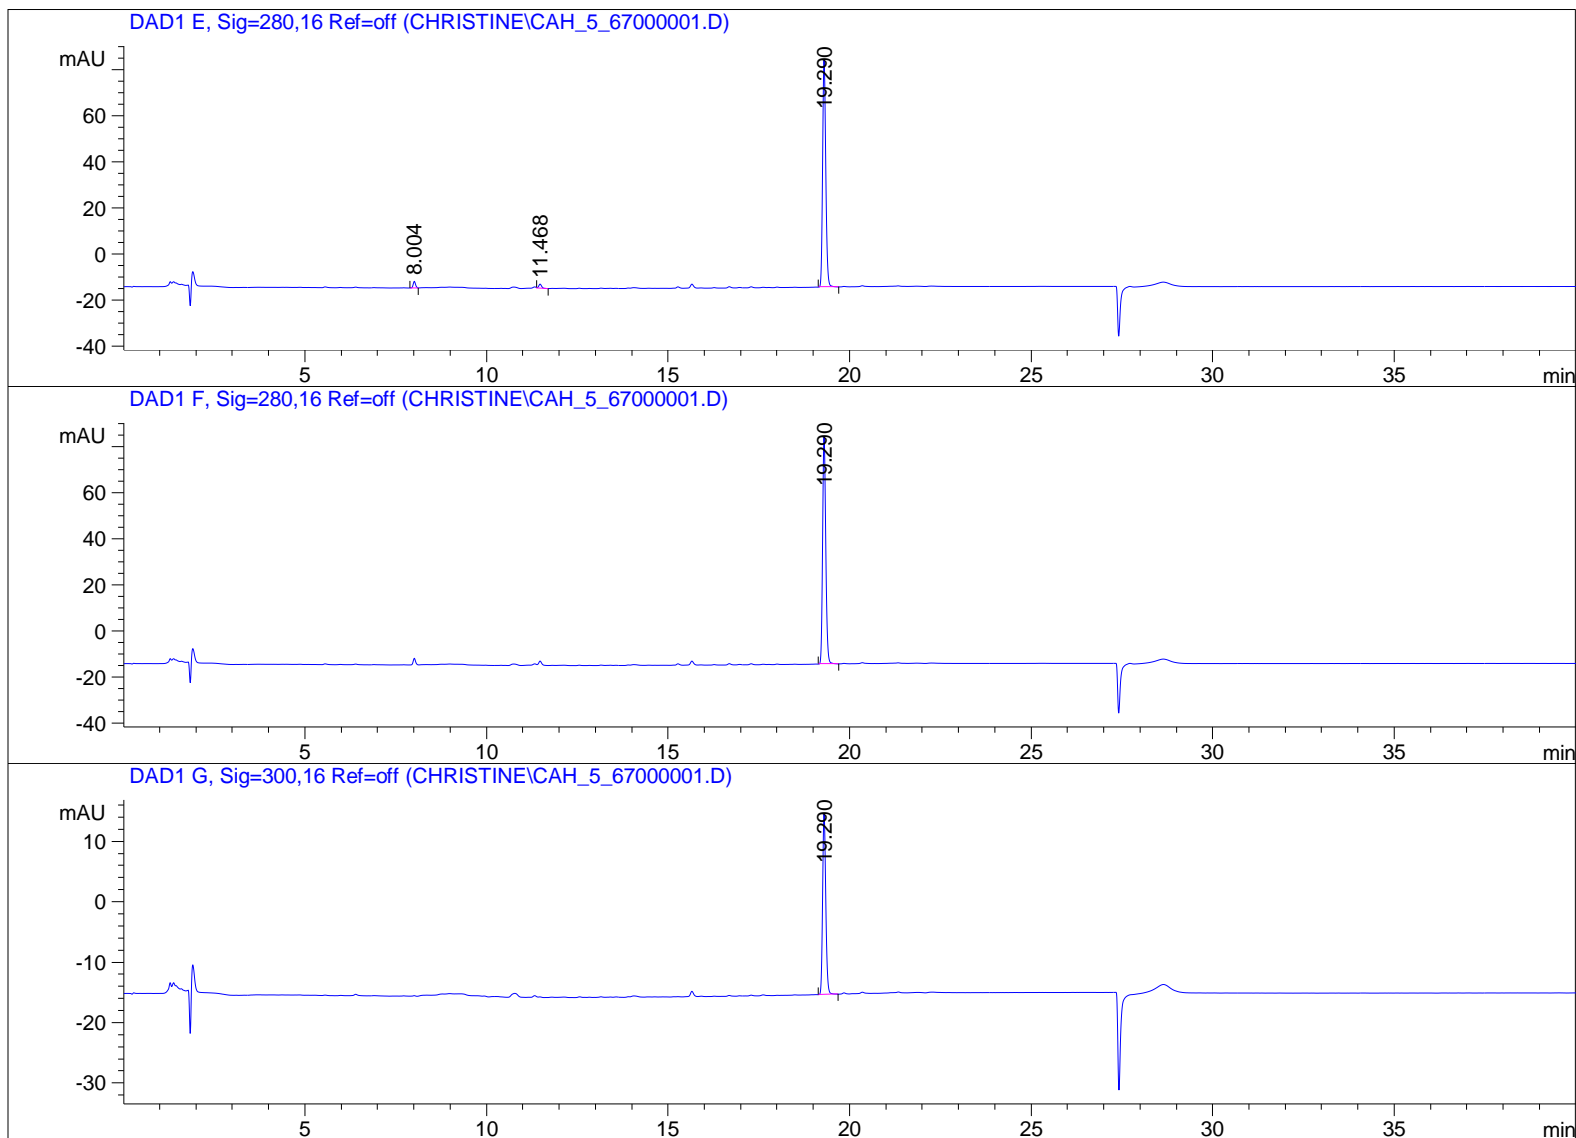

=====  
 Area Percent Report  
 =====

Sorted By : Signal  
 Multiplier : 1.0000  
 Dilution : 1.0000  
 Use Multiplier & Dilution Factor with ISTDs

Signal 1: DAD1 A, Sig=254,4 Ref=off

| Peak # | RetTime [min] | Type | Width [min] | Area [mAU*s] | Height [mAU] | Area %   |
|--------|---------------|------|-------------|--------------|--------------|----------|
| 1      | 19.290        | BB   | 0.0924      | 939.05951    | 155.64803    | 100.0000 |

Totals : 939.05951 155.64803

Signal 2: DAD1 B, Sig=254,16 Ref=off

| Peak # | RetTime [min] | Type | Width [min] | Area [mAU*s] | Height [mAU] | Area %   |
|--------|---------------|------|-------------|--------------|--------------|----------|
| 1      | 19.290        | BB   | 0.0924      | 933.50537    | 154.77390    | 100.0000 |

Totals : 933.50537 154.77390

Signal 3: DAD1 C, Sig=210,8 Ref=off

| Peak # | RetTime [min] | Type | Width [min] | Area [mAU*s] | Height [mAU] | Area %  |
|--------|---------------|------|-------------|--------------|--------------|---------|
| 1      | 1.376         | BV   | 0.0514      | 566.59003    | 167.64386    | 13.7716 |
| 2      | 11.468        | BB   | 0.1247      | 1325.44922   | 147.65602    | 32.2164 |
| 3      | 19.290        | BB   | 0.0945      | 2222.16187   | 367.52441    | 54.0120 |

Totals : 4114.20111 682.82430

Signal 4: DAD1 D, Sig=230,16 Ref=off

| Peak # | RetTime [min] | Type | Width [min] | Area [mAU*s] | Height [mAU] | Area %  |
|--------|---------------|------|-------------|--------------|--------------|---------|
| 1      | 1.286         | BV   | 0.1040      | 63.83619     | 8.09134      | 2.6688  |
| 2      | 8.004         | BB   | 0.0727      | 205.53131    | 43.84377     | 8.5927  |
| 3      | 11.468        | BB   | 0.1019      | 497.50229    | 70.89946     | 20.7993 |
| 4      | 19.290        | BB   | 0.0923      | 1625.05005   | 269.84534    | 67.9392 |

Totals : 2391.91984 392.67990

Signal 5: DAD1 E, Sig=280,16 Ref=off

| Peak # | RetTime [min] | Type | Width [min] | Area [mAU*s] | Height [mAU] | Area %  |
|--------|---------------|------|-------------|--------------|--------------|---------|
| 1      | 8.004         | BB   | 0.0713      | 12.97011     | 2.83754      | 2.0930  |
| 2      | 11.468        | VB   | 0.0893      | 11.36858     | 1.91306      | 1.8346  |
| 3      | 19.290        | BB   | 0.0924      | 595.34033    | 98.72345     | 96.0724 |

Totals : 619.67902 103.47405

Sample Name: CAH\_5\_67

Signal 6: DAD1 F, Sig=280,16 Ref=off

| Peak # | RetTime [min] | Type | Width [min] | Area [mAU*s] | Height [mAU] | Area %   |
|--------|---------------|------|-------------|--------------|--------------|----------|
| 1      | 19.290        | BB   | 0.0924      | 595.34247    | 98.72340     | 100.0000 |

Totals : 595.34247 98.72340

Signal 7: DAD1 G, Sig=300,16 Ref=off

| Peak # | RetTime [min] | Type | Width [min] | Area [mAU*s] | Height [mAU] | Area %   |
|--------|---------------|------|-------------|--------------|--------------|----------|
| 1      | 19.290        | BB   | 0.0925      | 181.02713    | 29.95630     | 100.0000 |

Totals : 181.02713 29.95630

=====  
\*\*\* End of Report \*\*\*

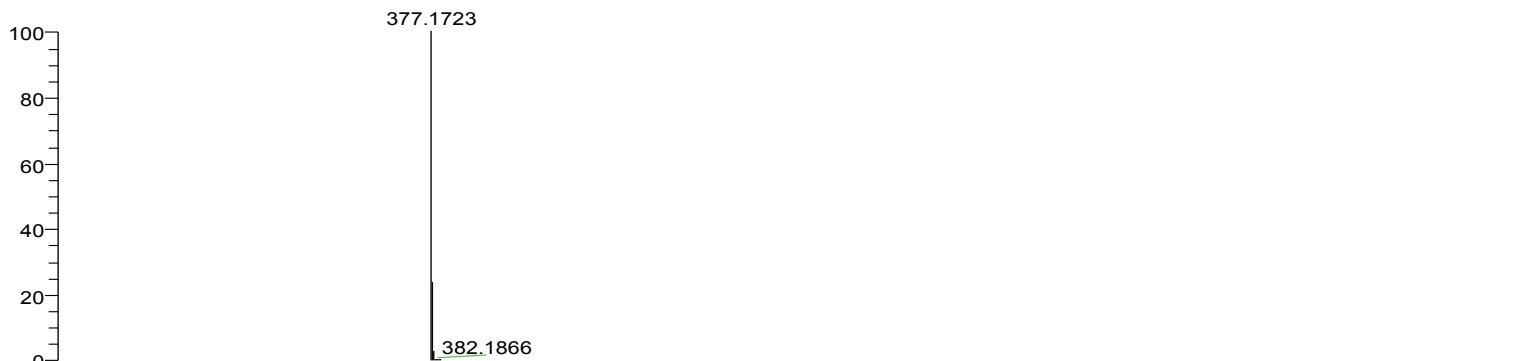

NL:  
7.79E5  
C<sub>22</sub>H<sub>26</sub>O<sub>4</sub>Na:  
C<sub>22</sub>H<sub>26</sub>O<sub>4</sub>Na<sub>1</sub>  
pa Chrg 1

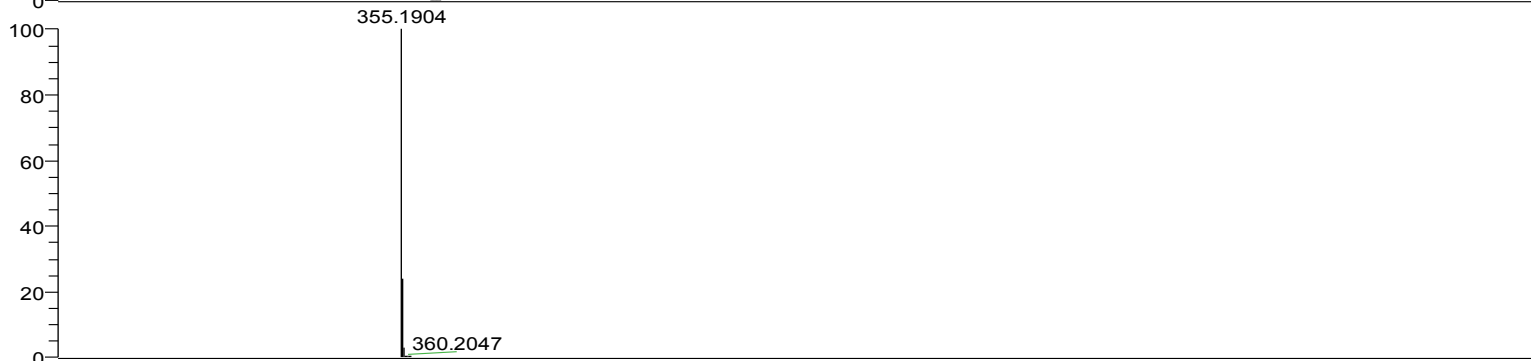

NL:  
7.79E5  
C<sub>22</sub>H<sub>27</sub>O<sub>4</sub>:  
C<sub>22</sub>H<sub>27</sub>O<sub>4</sub>  
pa Chrg 1

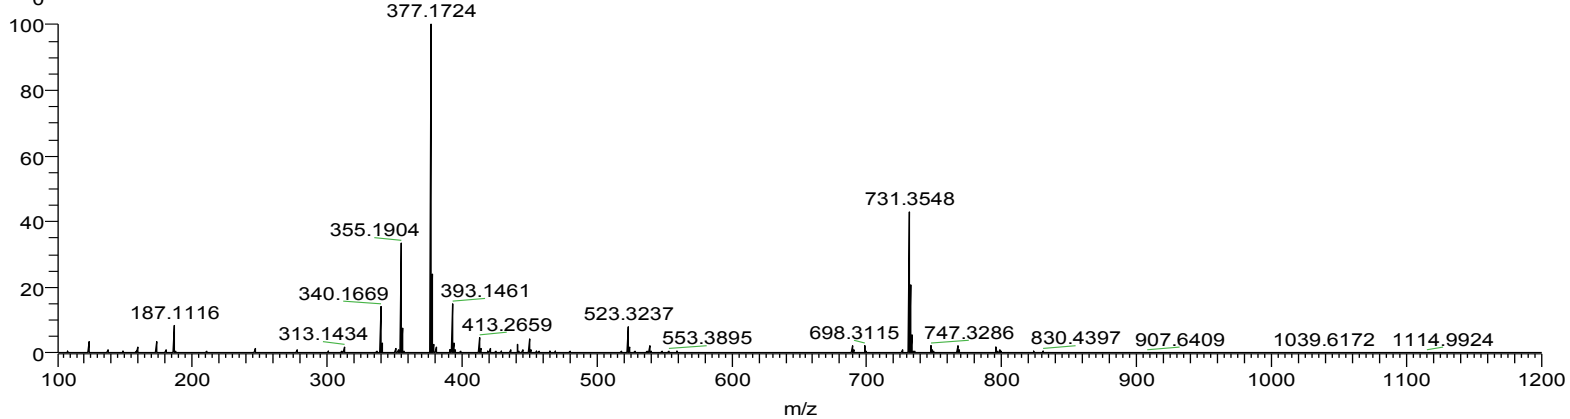

NL:  
1.63E7  
CAH\_5\_68\_Orbi\_+  
ES#1 RT: 0.00  
AV: 1 T: FTMS + p  
ESIFull ms  
[100.00-1200.00]

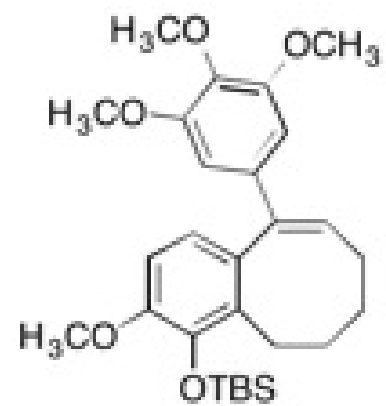

**22**

7.260  
 6.685  
 6.671  
 6.569  
 6.555  
 6.423  
 6.207  
 6.194  
 6.180  
 4.134  
 4.122  
 4.110  
 4.098  
 3.835  
 3.803  
 3.779  
 3.286  
 3.273  
 3.265  
 3.252  
 3.255  
 2.242  
 2.234  
 2.222  
 2.202  
 2.168  
 2.041  
 1.979  
 1.975  
 1.964  
 1.953  
 1.947  
 1.946  
 1.945  
 1.765  
 1.759  
 1.747  
 1.737  
 1.732  
 1.726  
 1.688  
 1.669  
 1.651  
 1.631  
 1.419  
 1.397  
 1.390  
 1.376  
 1.375  
 1.370  
 1.357  
 1.355  
 1.349  
 1.340  
 1.337  
 1.016  
 0.965  
 0.954  
 0.888  
 0.877  
 0.865  
 0.850  
 0.841  
 0.838  
 0.830  
 0.272  
 0.236

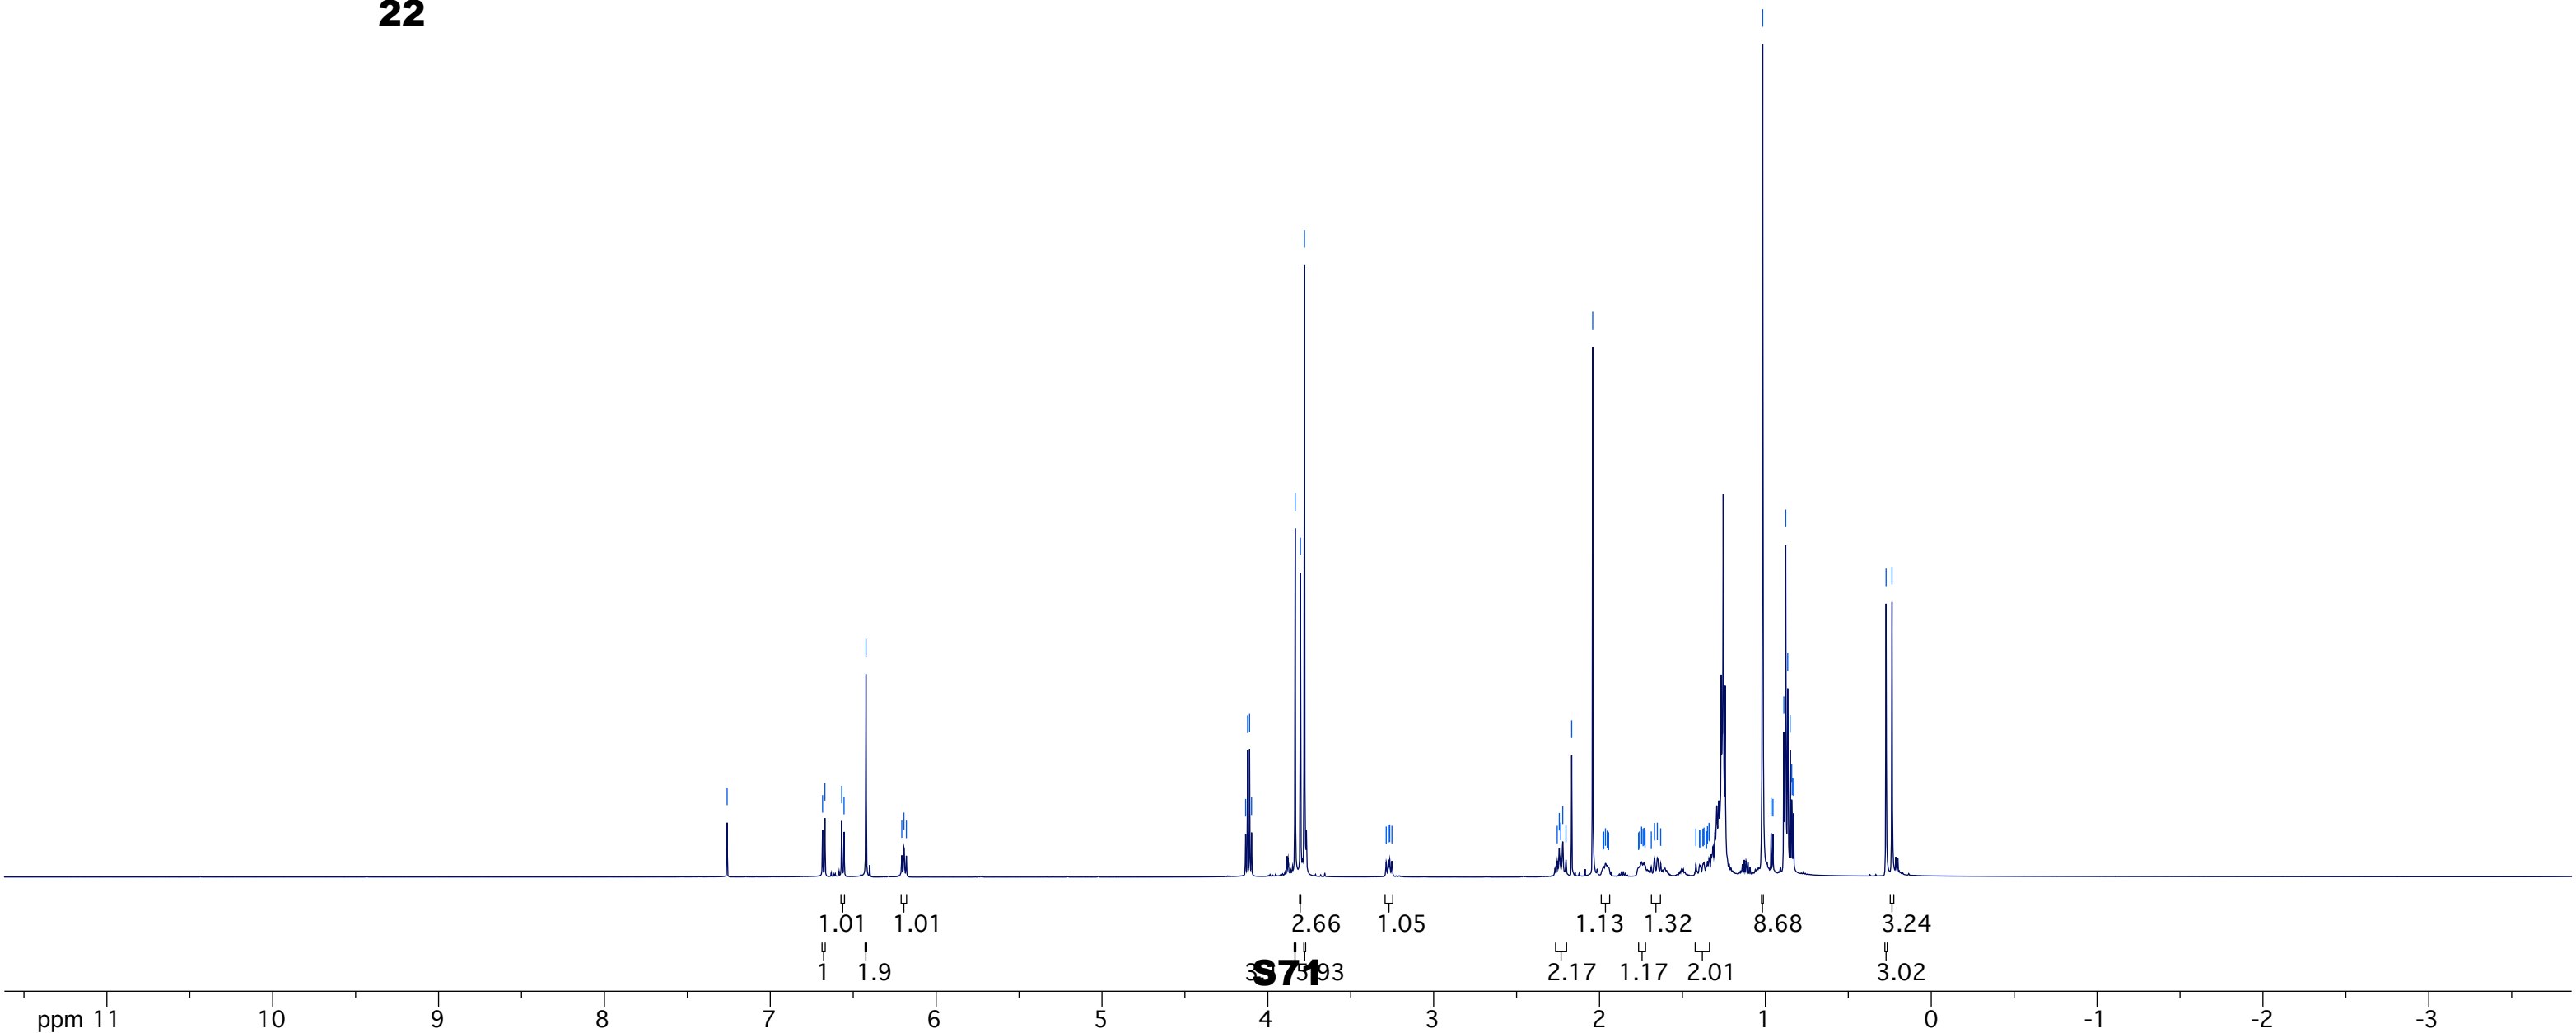

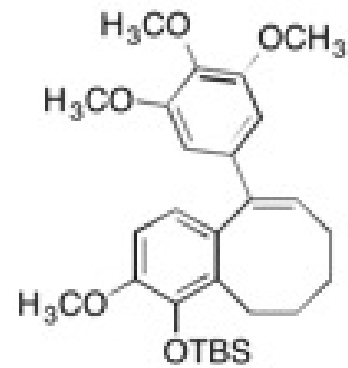

**22**

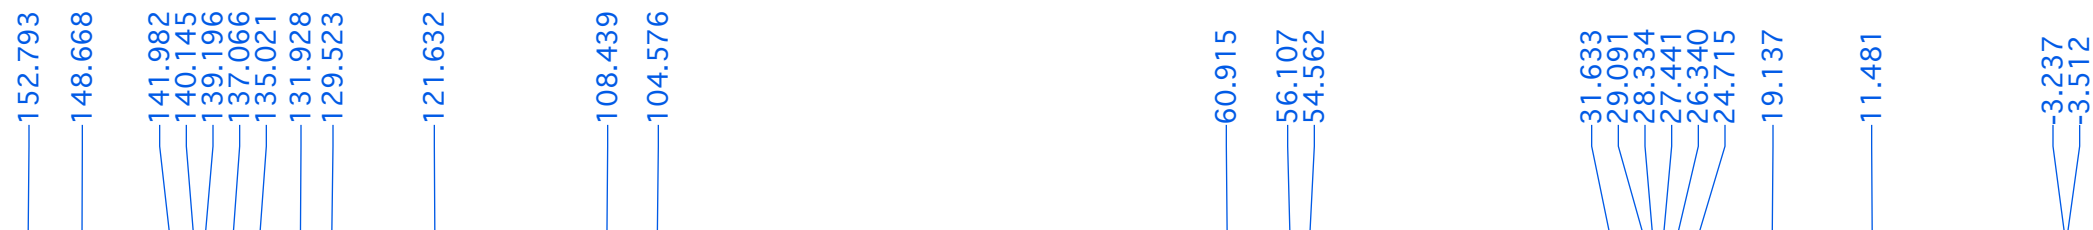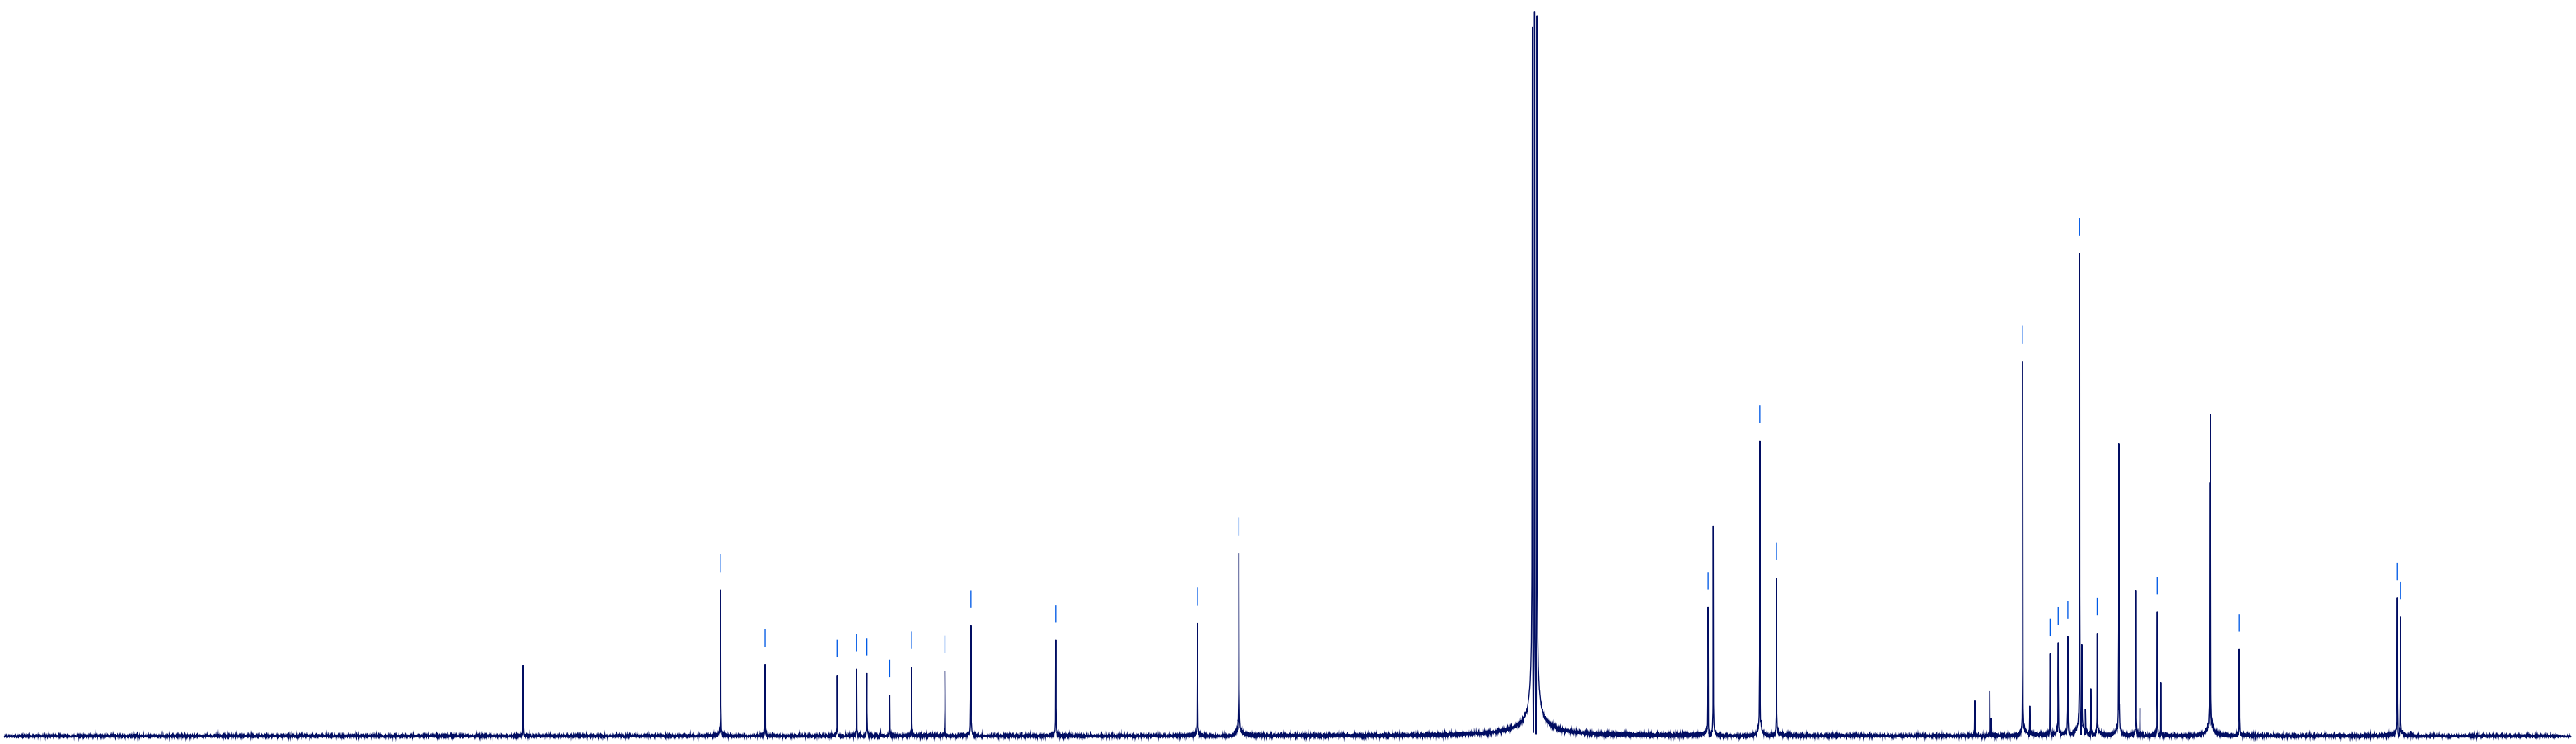

**S72**

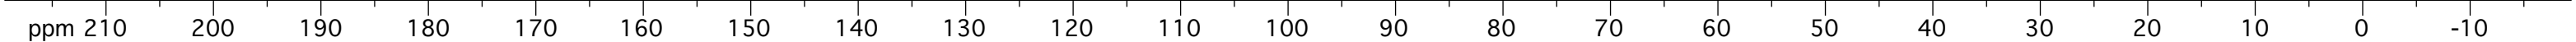



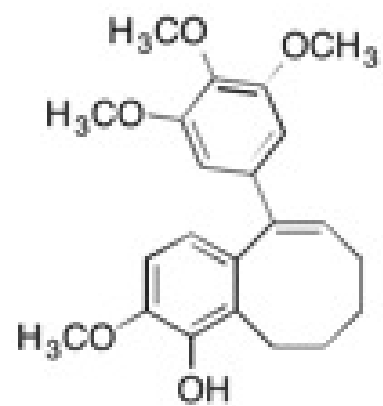

**23**

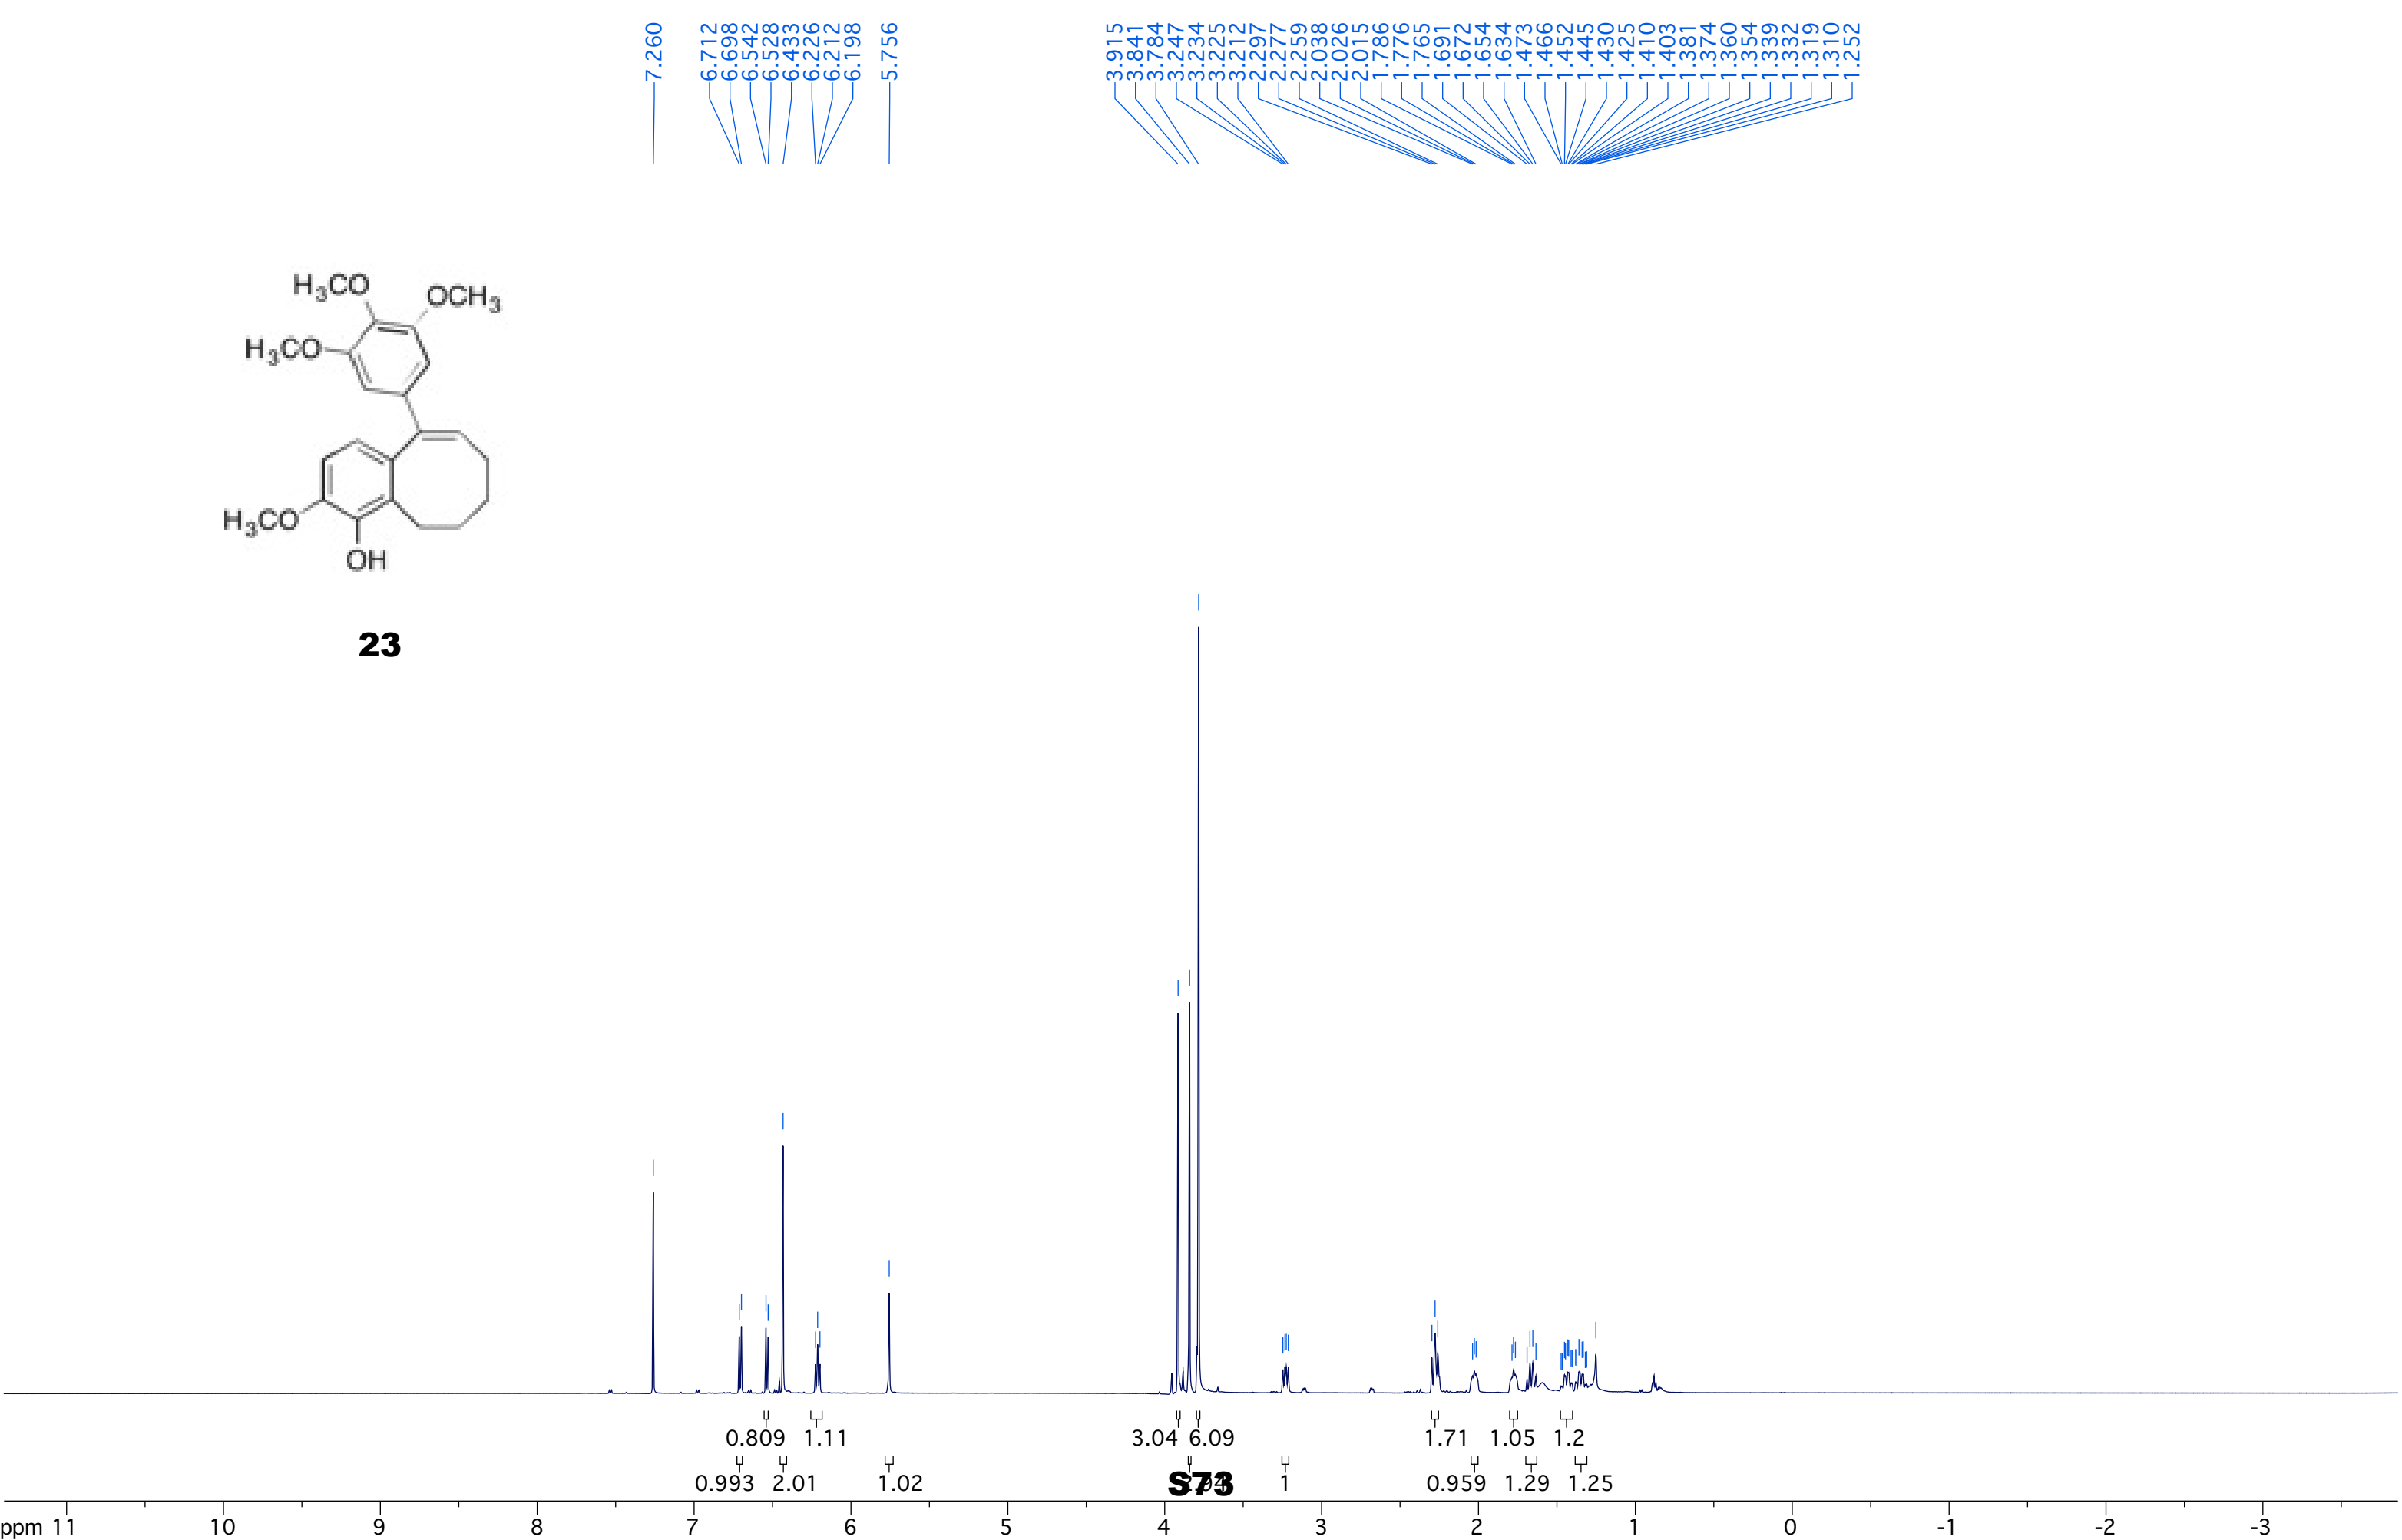

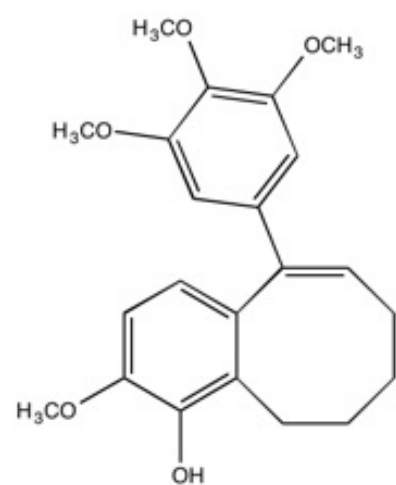

**23**

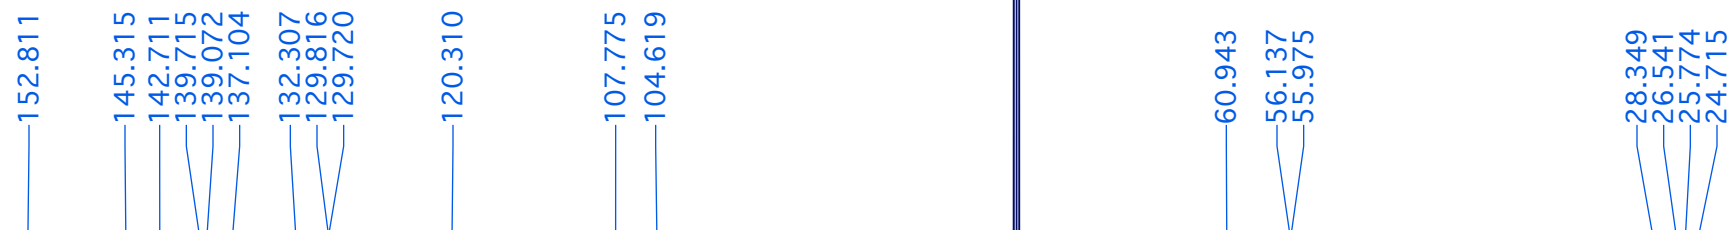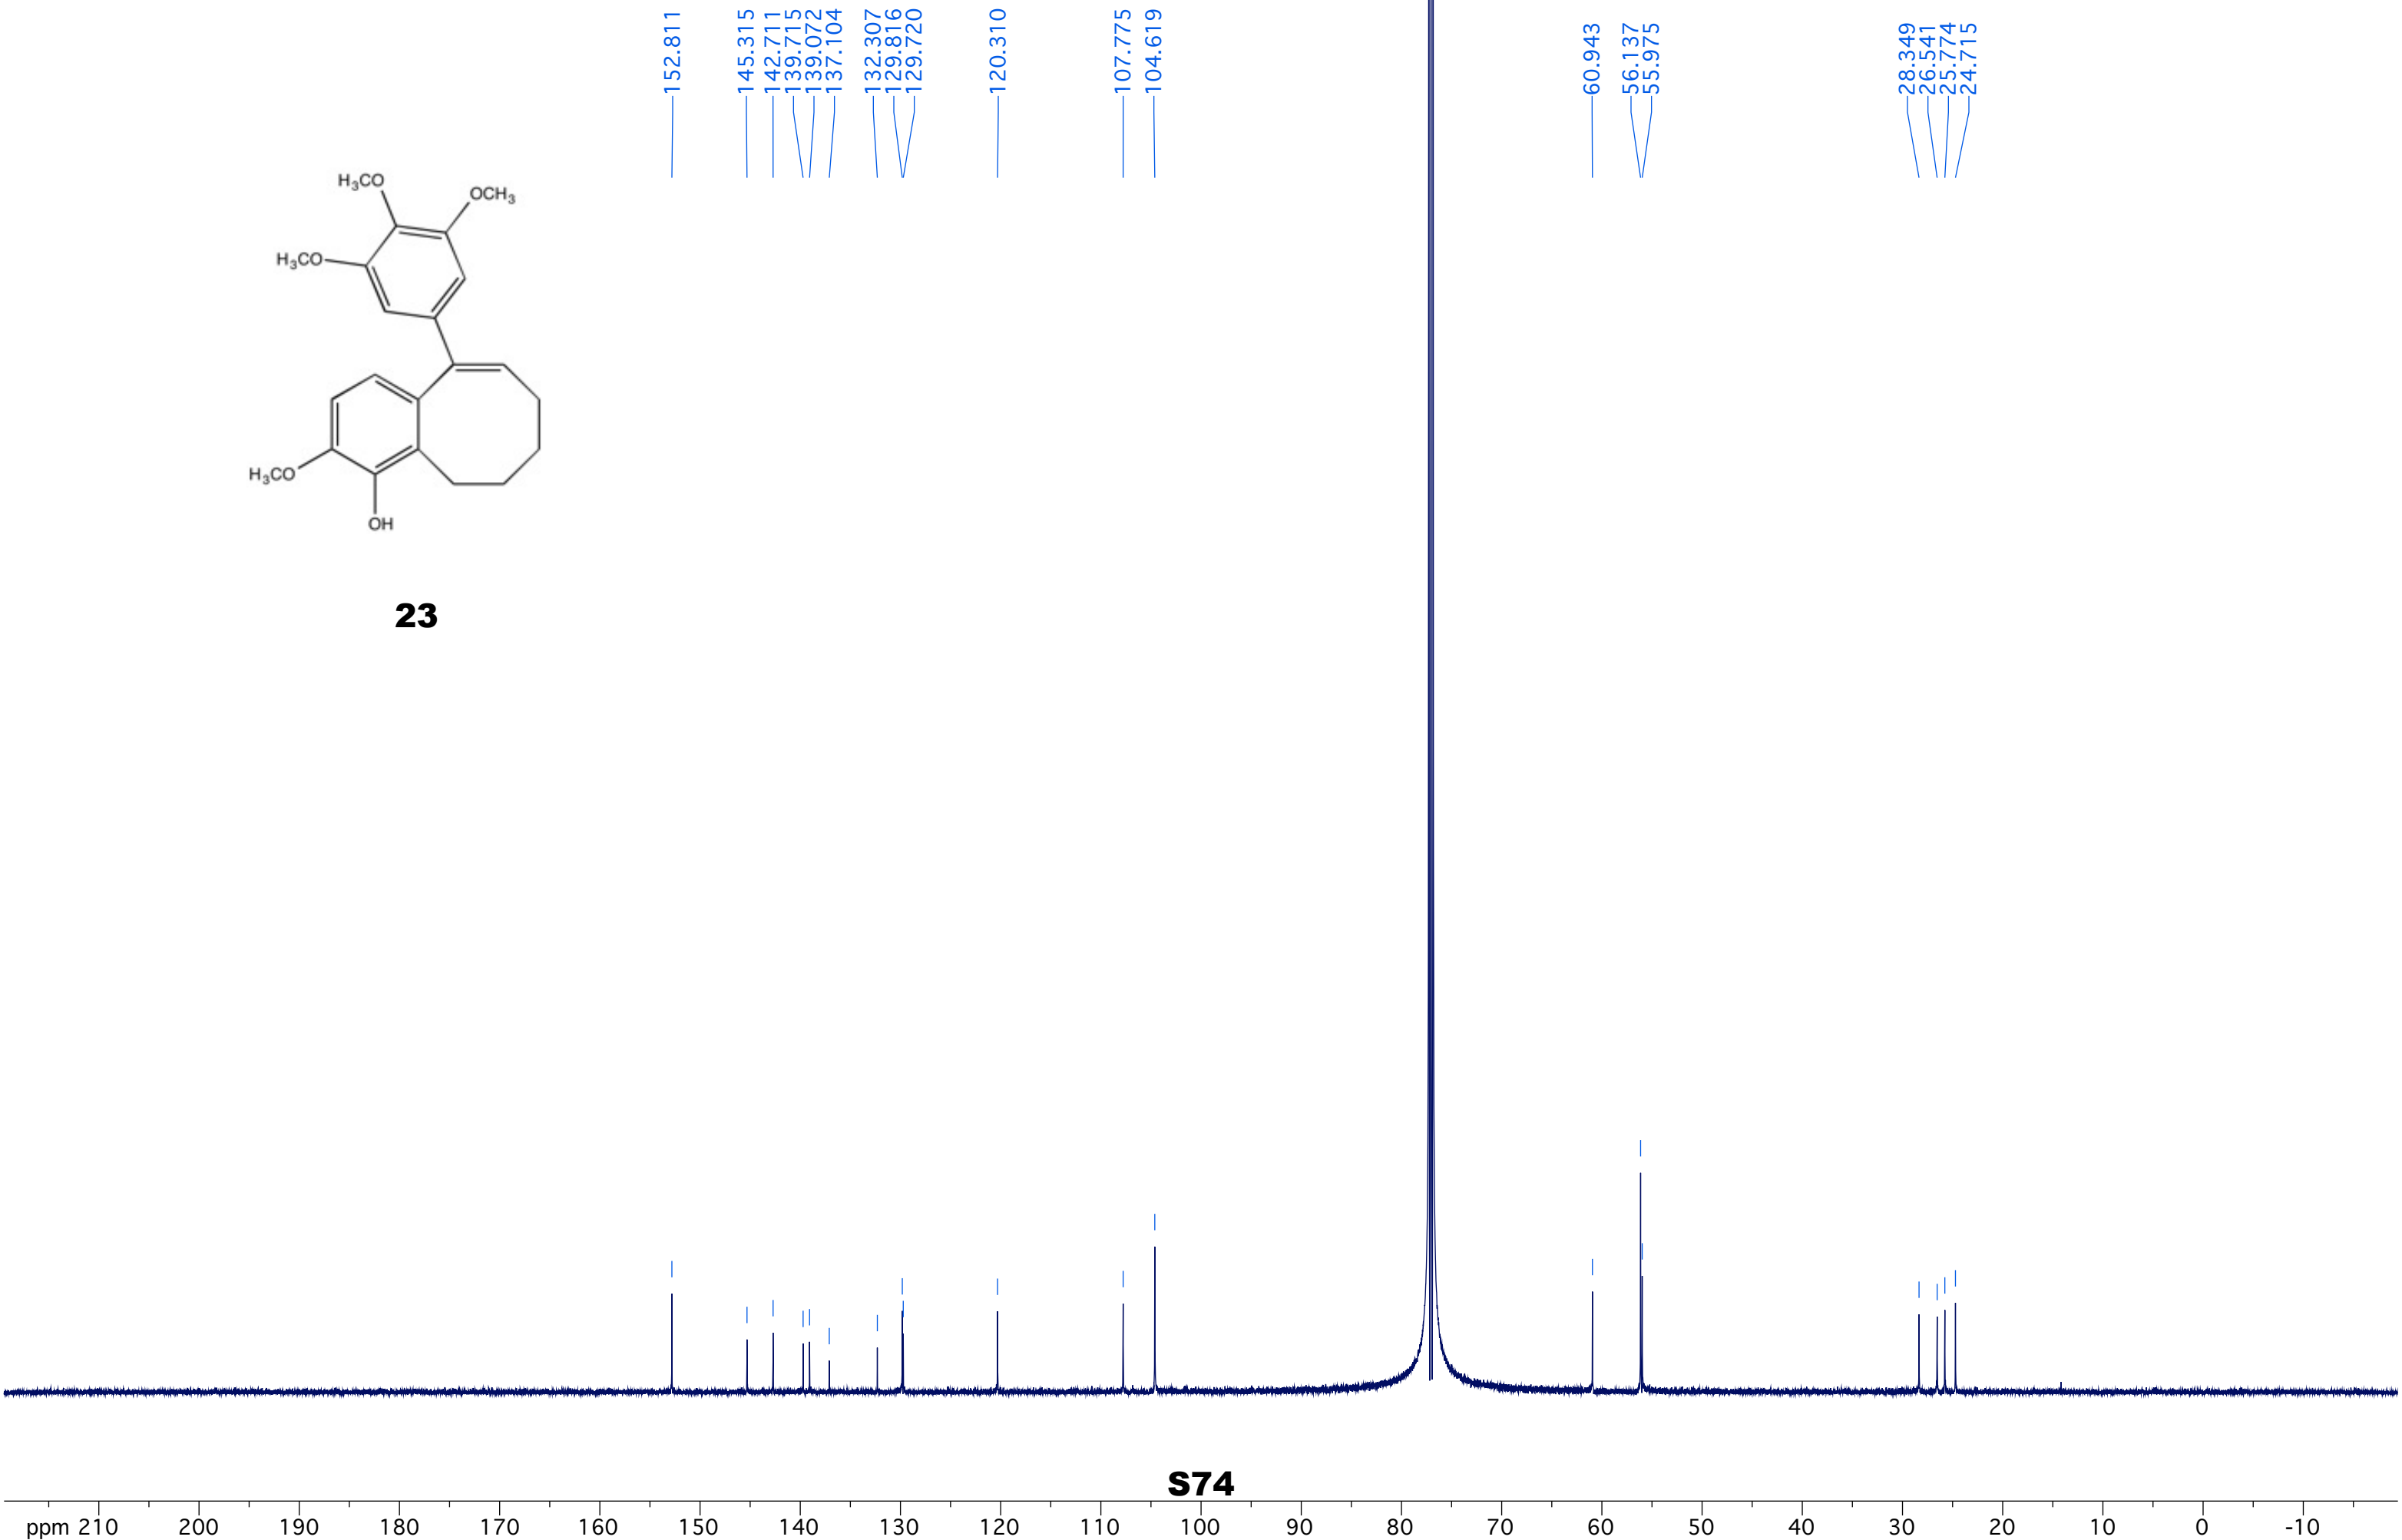

**S74**

Sample Name: cah-5-15

=====  
Acq. Operator : Christine  
Acq. Instrument : Instrument 1 Location : -  
Injection Date : 1/28/2015 12:58:55 PM  
Acq. Method : C:\CHEM32\1\METHODS\MASTERMETHOD.M  
Last changed : 1/28/2015 12:55:13 PM by Christine  
Analysis Method : C:\CHEM32\1\DATA\CHRISTINE\CAH-5-1500002.D\DA.M (MASTERMETHOD.M)  
Last changed : 1/28/2015 1:50:44 PM by Christine

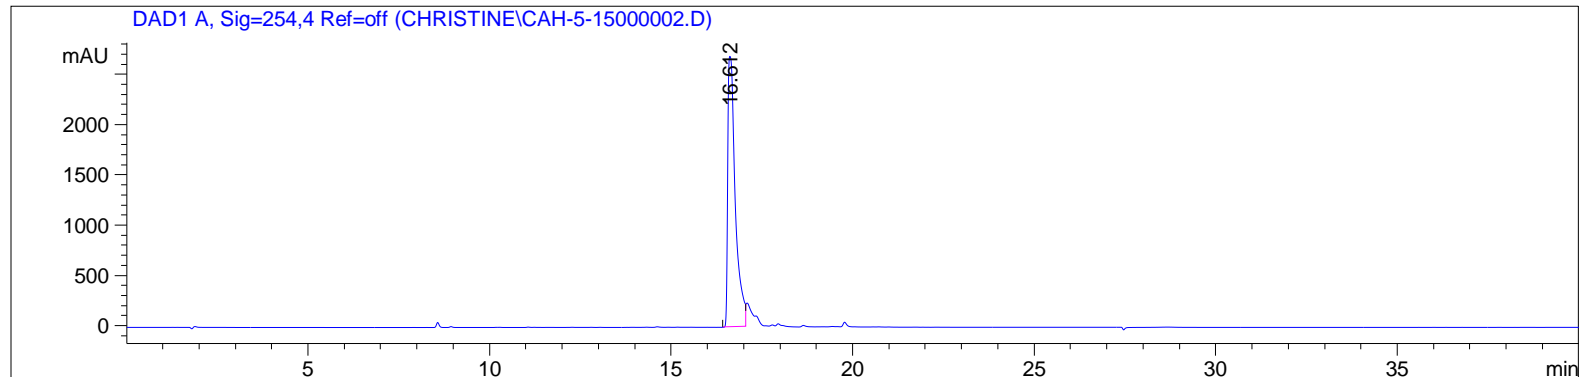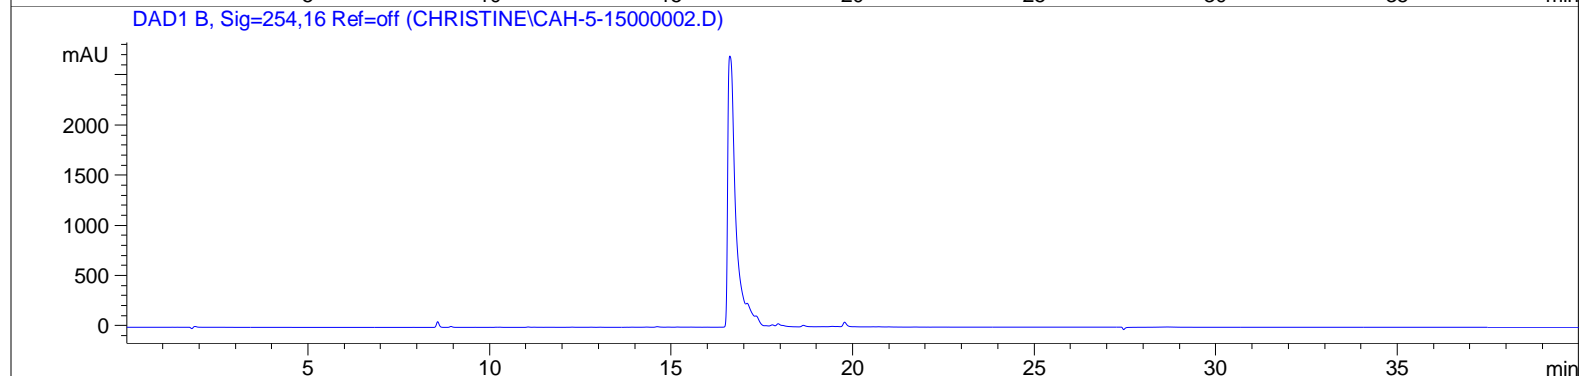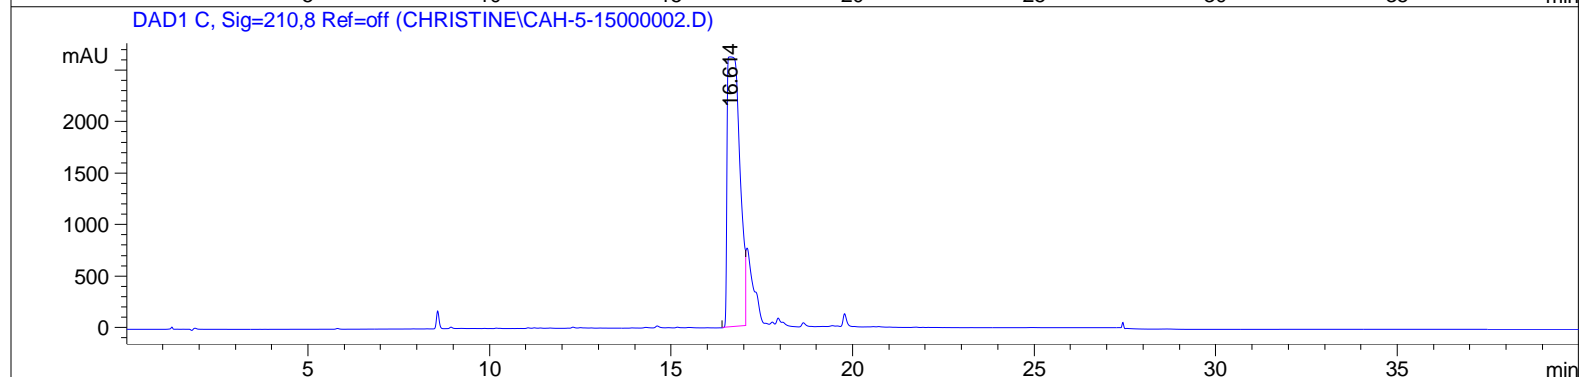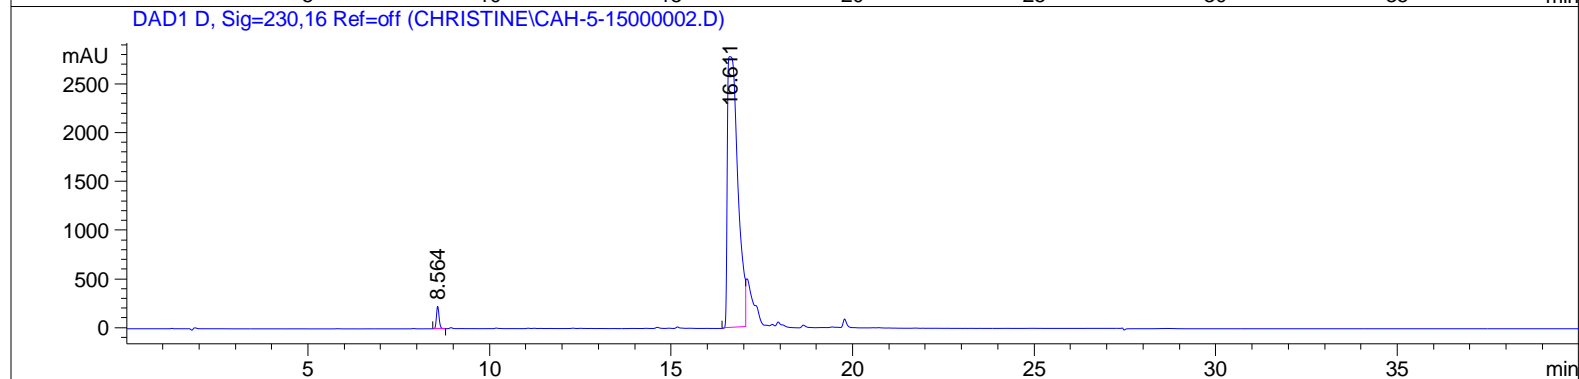

Sample Name: cah-5-15

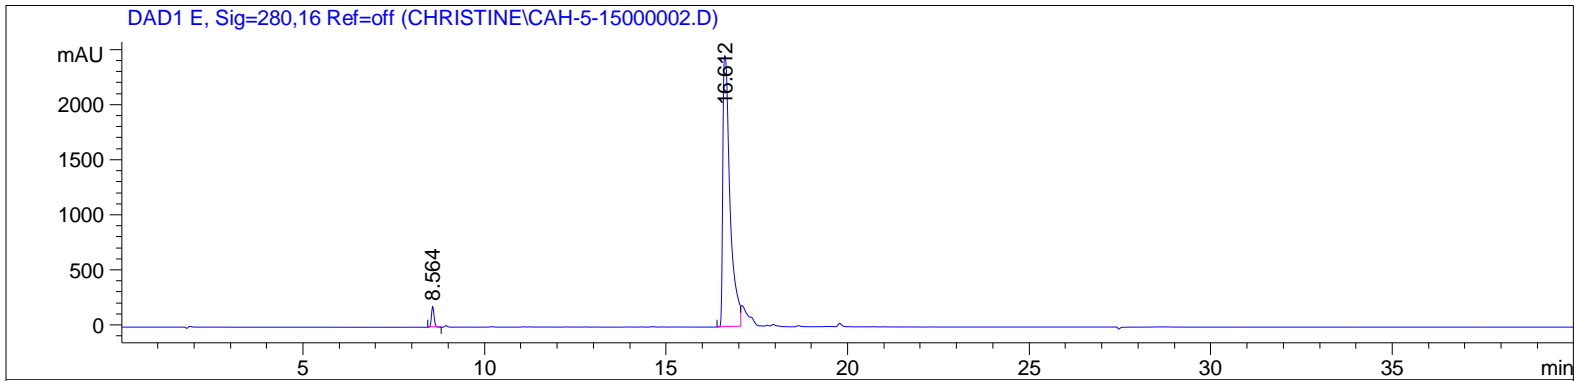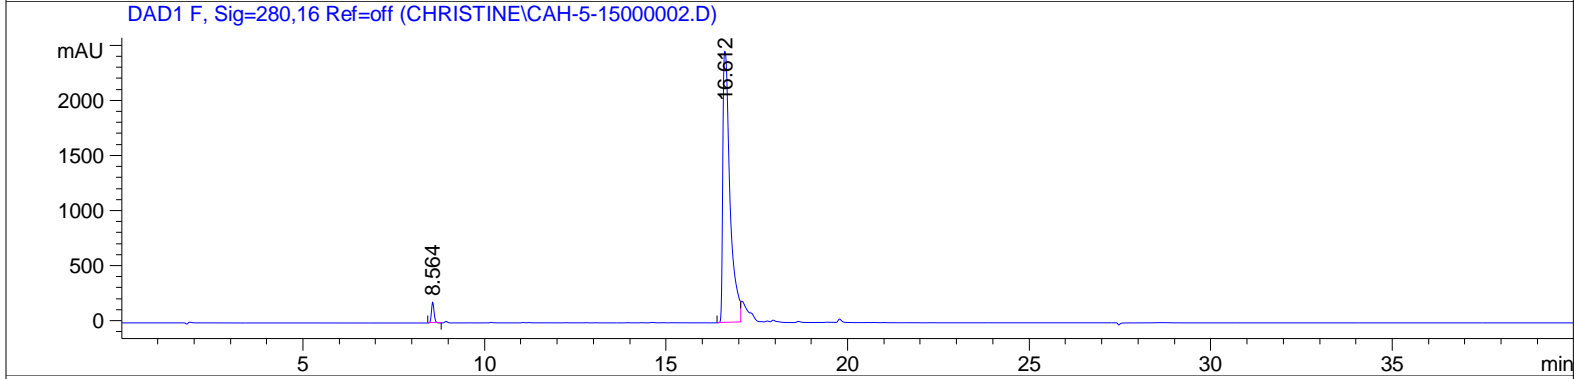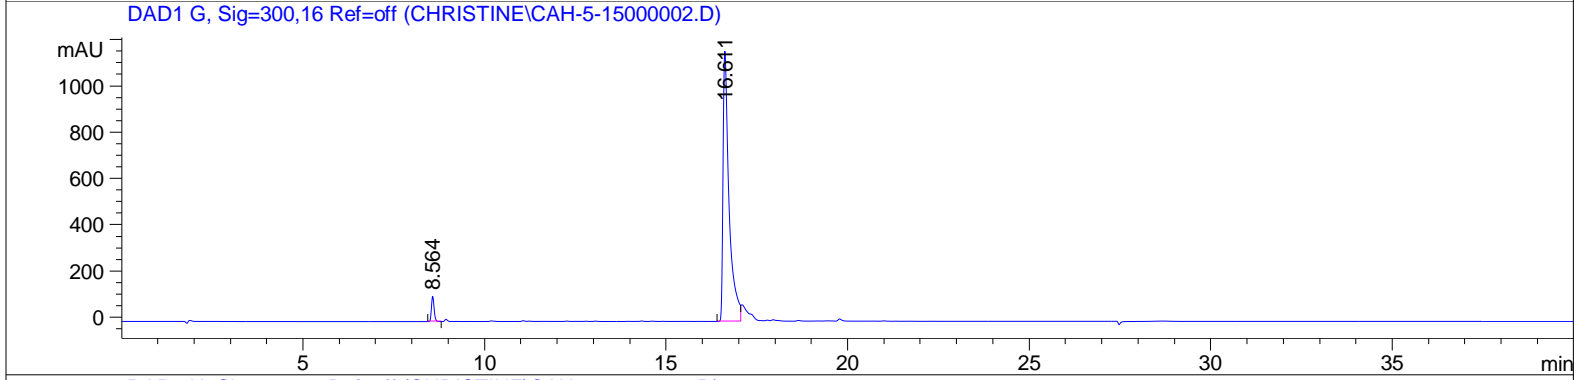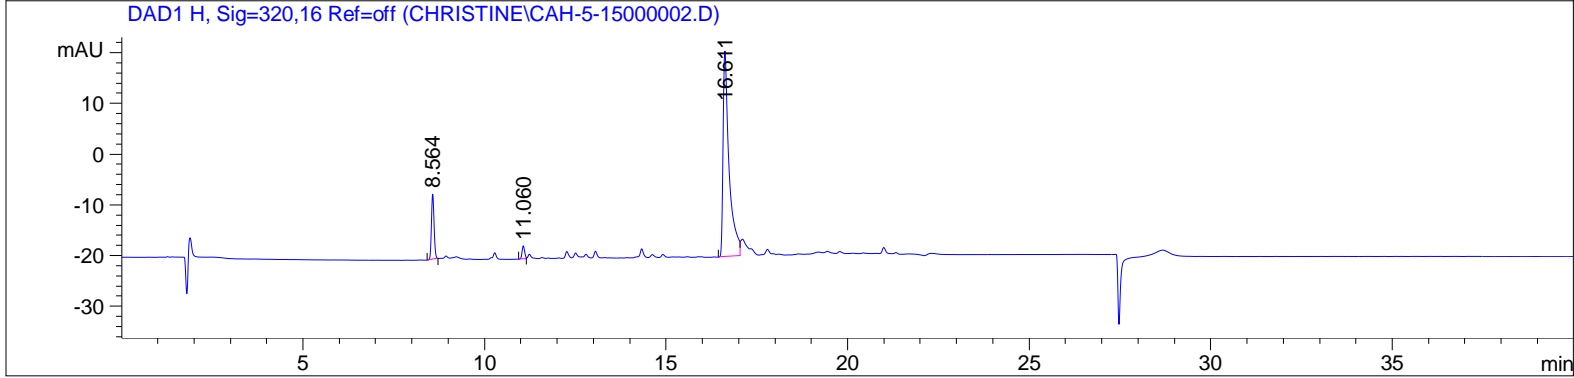

=====  
 Area Percent Report  
 =====

Sorted By : Signal  
 Multiplier : 1.0000  
 Dilution : 1.0000  
 Use Multiplier & Dilution Factor with ISTDs

Sample Name: cah-5-15

Signal 1: DAD1 A, Sig=254,4 Ref=off

| Peak # | RetTime [min] | Type | Width [min] | Area [mAU*s] | Height [mAU] | Area %   |
|--------|---------------|------|-------------|--------------|--------------|----------|
| 1      | 16.612        | BV   | 0.2164      | 3.88516e4    | 2691.22314   | 100.0000 |

Totals :                                   3.88516e4   2691.22314

Signal 2: DAD1 B, Sig=254,16 Ref=off

Signal 3: DAD1 C, Sig=210,8 Ref=off

| Peak # | RetTime [min] | Type | Width [min] | Area [mAU*s] | Height [mAU] | Area %   |
|--------|---------------|------|-------------|--------------|--------------|----------|
| 1      | 16.614        | BV   | 0.3761      | 6.34811e4    | 2625.34521   | 100.0000 |

Totals :                                   6.34811e4   2625.34521

Signal 4: DAD1 D, Sig=230,16 Ref=off

| Peak # | RetTime [min] | Type | Width [min] | Area [mAU*s] | Height [mAU] | Area %  |
|--------|---------------|------|-------------|--------------|--------------|---------|
| 1      | 8.564         | BB   | 0.0771      | 1163.02673   | 229.77750    | 2.0414  |
| 2      | 16.611        | BV   | 0.3100      | 5.58100e4    | 2782.44800   | 97.9586 |

Totals :                                   5.69730e4   3012.22549

Signal 5: DAD1 E, Sig=280,16 Ref=off

| Peak # | RetTime [min] | Type | Width [min] | Area [mAU*s] | Height [mAU] | Area %  |
|--------|---------------|------|-------------|--------------|--------------|---------|
| 1      | 8.564         | BV   | 0.0773      | 953.32397    | 187.54671    | 2.7213  |
| 2      | 16.612        | BV   | 0.2055      | 3.40785e4    | 2462.50952   | 97.2787 |

Totals :                                   3.50318e4   2650.05623

Sample Name: cah-5-15

Signal 6: DAD1 F, Sig=280,16 Ref=off

| Peak # | RetTime [min] | Type | Width [min] | Area [mAU*s] | Height [mAU] | Area %  |
|--------|---------------|------|-------------|--------------|--------------|---------|
| 1      | 8.564         | BV   | 0.0773      | 953.32397    | 187.54671    | 2.7213  |
| 2      | 16.612        | BV   | 0.2055      | 3.40785e4    | 2462.50952   | 97.2787 |

Totals : 3.50318e4 2650.05623

Signal 7: DAD1 G, Sig=300,16 Ref=off

| Peak # | RetTime [min] | Type | Width [min] | Area [mAU*s] | Height [mAU] | Area %  |
|--------|---------------|------|-------------|--------------|--------------|---------|
| 1      | 8.564         | BV   | 0.0773      | 555.76282    | 109.26016    | 3.9560  |
| 2      | 16.611        | BV   | 0.1668      | 1.34929e4    | 1167.44519   | 96.0440 |

Totals : 1.40486e4 1276.70535

Signal 8: DAD1 H, Sig=320,16 Ref=off

| Peak # | RetTime [min] | Type | Width [min] | Area [mAU*s] | Height [mAU] | Area %  |
|--------|---------------|------|-------------|--------------|--------------|---------|
| 1      | 8.564         | BB   | 0.0763      | 64.41962     | 12.88749     | 11.7453 |
| 2      | 11.060        | BV   | 0.0800      | 13.31195     | 2.58971      | 2.4271  |
| 3      | 16.611        | BV   | 0.1653      | 470.73935    | 40.60112     | 85.8276 |

Totals : 548.47093 56.07832

\*\*\* End of Report \*\*\*

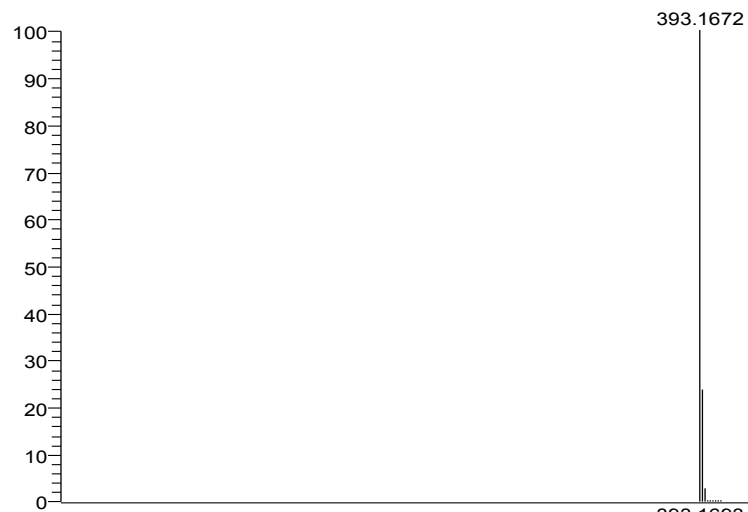

NL:  
7.77E5  
C<sub>22</sub>H<sub>26</sub>O<sub>5</sub>Na:  
C<sub>22</sub>H<sub>26</sub>O<sub>5</sub>Na<sub>1</sub>  
pa Chrg 1

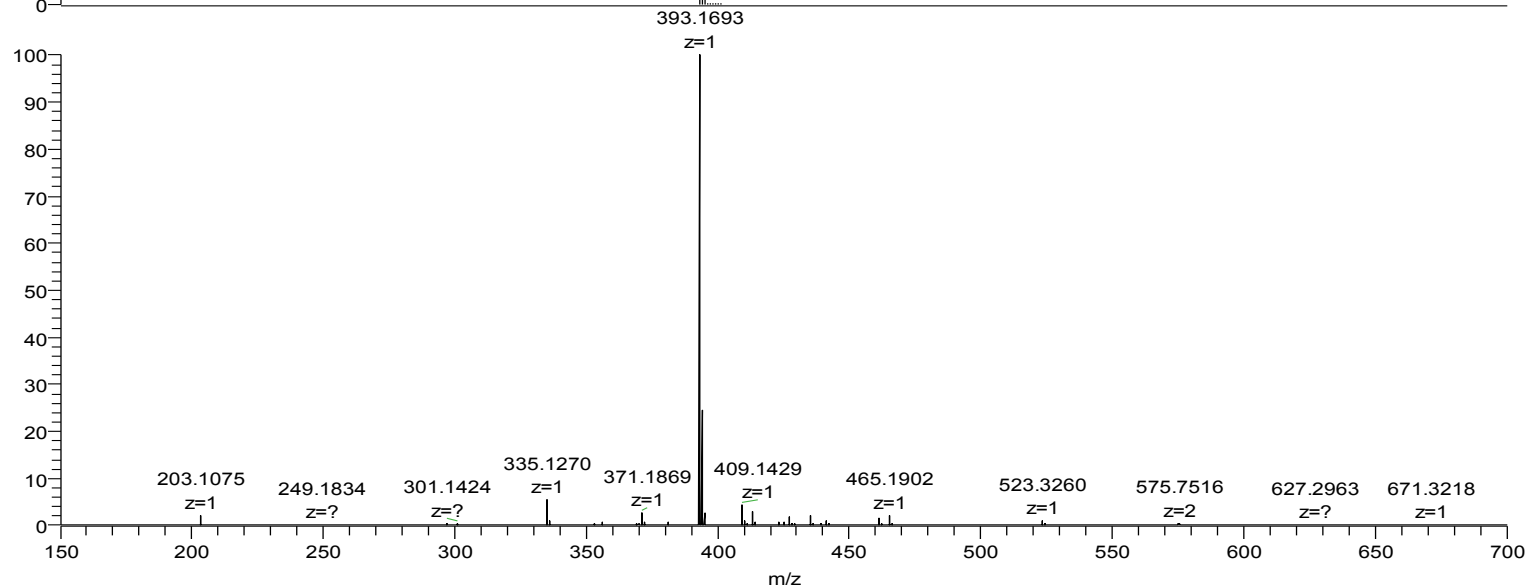

NL:  
5.43E7  
CAH\_5\_15\_Orbi\_+  
ES#1 RT: 0.01  
AV: 1 T: FTMS + p  
ESI Full ms  
[150.00-700.00]

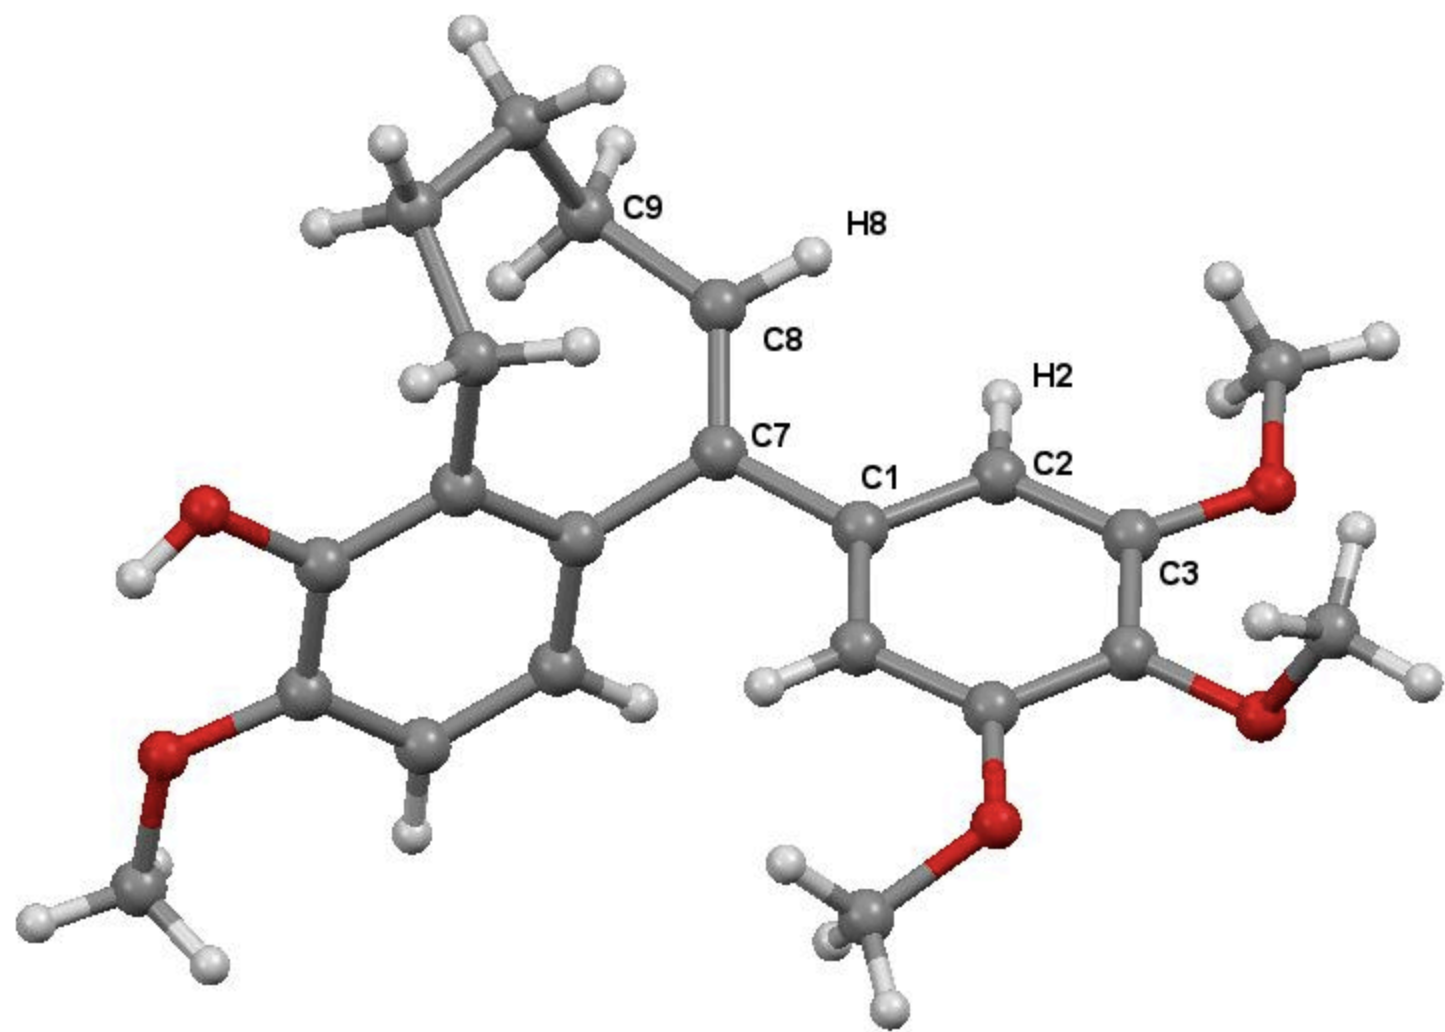

**S80**



## X-ray Crystallographic Analysis:

X-ray crystallographic analysis of compound **23**. Crystallographic data

were collected on a crystal of **23** with dimensions 0.171 x 0.130 x 0.089 mm<sup>3</sup>. Data were collected at 150 K on a Bruker X8 Apex using Mo KR radiation ( $\lambda = 0.71073 \text{ \AA}$ ). The structure was solved by direct methods after correction of the data using SADABS.

Crystallographic data and refinement details for the complex mentioned herein is found in the Supporting Information (Table S5-S9). All data were processed using the Bruker AXS SHELXTL software, version 6.10.

Table 5. Crystal data and structure refinement for Compound 23.

|                                 |                                                |          |
|---------------------------------|------------------------------------------------|----------|
| Identification code             | Compound 23                                    |          |
| Empirical formula               | C <sub>22</sub> H <sub>26</sub> O <sub>5</sub> |          |
| Formula weight                  | 370.43                                         |          |
| Temperature                     | 150(2) K                                       |          |
| Wavelength                      | 0.71073 Å                                      |          |
| Crystal system                  | Orthorhombic                                   |          |
| Space group                     | P b c a                                        |          |
| Unit cell dimensions            | a = 16.6410(12) Å                              | a = 90°. |
|                                 | b = 11.1239(8) Å                               | b = 90°. |
|                                 | c = 20.5570(13) Å                              | g = 90°. |
| Volume                          | 3805.4(5) Å <sup>3</sup>                       |          |
| Z                               | 8                                              |          |
| Density (calculated)            | 1.293 Mg/m <sup>3</sup>                        |          |
| Absorption coefficient          | 0.091 mm <sup>-1</sup>                         |          |
| F(000)                          | 1584                                           |          |
| Crystal size                    | 0.171 x 0.130 x 0.089 mm <sup>3</sup>          |          |
| Theta range for data collection | 2.963 to 26.370°.                              |          |
| Index ranges                    | -20<=h<=20, -13<=k<=13, -25<=l<=24             |          |
| Reflections collected           | 80769                                          |          |
| Independent reflections         | 3865 [R(int) = 0.0567]                         |          |
| Completeness to theta = 25.242° | 99.7 %                                         |          |
| Absorption correction           | Semi-empirical from equivalents                |          |

|                                   |                                             |
|-----------------------------------|---------------------------------------------|
| Max. and min. transmission        | 0.966 and 0.959                             |
| Refinement method                 | Full-matrix least-squares on F <sup>2</sup> |
| Data / restraints / parameters    | 3865 / 0 / 252                              |
| Goodness-of-fit on F <sup>2</sup> | 1.029                                       |
| Final R indices [I>2sigma(I)]     | R1 = 0.0365, wR2 = 0.0902                   |
| R indices (all data)              | R1 = 0.0476, wR2 = 0.0964                   |
| Extinction coefficient            | n/a                                         |
| Largest diff. peak and hole       | 0.264 and -0.179 e.Å <sup>-3</sup>          |

Table 6. Atomic coordinates ( $\times 10^4$ ) and equivalent isotropic displacement parameters ( $\text{\AA}^2 \times 10^3$ ) for Compound 23.  $U(\text{eq})$  is defined as one third of the trace of the orthogonalized  $U^{ij}$  tensor.

|       | x       | y       | z       | $U(\text{eq})$ |
|-------|---------|---------|---------|----------------|
| O(1)  | 6253(1) | 3752(1) | 2758(1) | 33(1)          |
| O(2)  | 6709(1) | 1740(1) | 2161(1) | 32(1)          |
| O(3)  | 2132(1) | 2432(1) | 1252(1) | 30(1)          |
| O(4)  | 1339(1) | 3655(1) | 318(1)  | 32(1)          |
| O(5)  | 2058(1) | 5446(1) | -342(1) | 33(1)          |
| C(1)  | 5933(1) | 3482(1) | 2159(1) | 25(1)          |
| C(2)  | 6161(1) | 2438(1) | 1831(1) | 25(1)          |
| C(3)  | 5839(1) | 2181(1) | 1226(1) | 28(1)          |
| C(4)  | 5304(1) | 2991(1) | 949(1)  | 28(1)          |
| C(5)  | 5079(1) | 4044(1) | 1265(1) | 25(1)          |
| C(6)  | 5379(1) | 4281(1) | 1893(1) | 25(1)          |
| C(7)  | 5110(1) | 5342(1) | 2301(1) | 29(1)          |
| C(8)  | 5675(1) | 6433(1) | 2275(1) | 34(1)          |
| C(9)  | 5567(1) | 7256(1) | 1691(1) | 36(1)          |
| C(10) | 5583(1) | 6606(1) | 1029(1) | 33(1)          |
| C(11) | 4779(1) | 6077(1) | 857(1)  | 29(1)          |
| C(12) | 4546(1) | 4933(1) | 936(1)  | 26(1)          |
| C(13) | 3728(1) | 4541(1) | 739(1)  | 26(1)          |
| C(14) | 3345(1) | 3609(1) | 1070(1) | 26(1)          |
| C(15) | 2548(1) | 3322(1) | 933(1)  | 25(1)          |
| C(16) | 2122(1) | 3961(1) | 463(1)  | 26(1)          |
| C(17) | 2516(1) | 4872(1) | 119(1)  | 26(1)          |
| C(18) | 3313(1) | 5152(1) | 249(1)  | 27(1)          |
| C(19) | 6957(1) | 652(1)  | 1853(1) | 39(1)          |
| C(20) | 2608(1) | 1511(1) | 1544(1) | 31(1)          |
| C(21) | 761(1)  | 4440(2) | 613(1)  | 37(1)          |
| C(22) | 2446(1) | 6392(1) | -692(1) | 36(1)          |

Table 7. Bond lengths [ $\text{\AA}$ ] and angles [ $^\circ$ ] for Compound 23.

---

|                  |            |
|------------------|------------|
| O(1)-C(1)        | 1.3737(16) |
| O(2)-C(2)        | 1.3762(16) |
| O(2)-C(19)       | 1.4259(17) |
| O(3)-C(15)       | 1.3756(16) |
| O(3)-C(20)       | 1.4281(16) |
| O(4)-C(16)       | 1.3796(16) |
| O(4)-C(21)       | 1.4350(18) |
| O(5)-C(17)       | 1.3722(16) |
| O(5)-C(22)       | 1.4294(17) |
| C(1)-C(6)        | 1.3917(19) |
| C(1)-C(2)        | 1.3966(19) |
| C(2)-C(3)        | 1.3834(19) |
| C(3)-C(4)        | 1.3894(19) |
| C(4)-C(5)        | 1.3902(19) |
| C(5)-C(6)        | 1.4090(18) |
| C(5)-C(12)       | 1.4902(19) |
| C(6)-C(7)        | 1.5153(18) |
| C(7)-C(8)        | 1.537(2)   |
| C(8)-C(9)        | 1.521(2)   |
| C(9)-C(10)       | 1.540(2)   |
| C(10)-C(11)      | 1.505(2)   |
| C(11)-C(12)      | 1.340(2)   |
| C(12)-C(13)      | 1.4863(18) |
| C(13)-C(14)      | 1.3940(19) |
| C(13)-C(18)      | 1.3977(19) |
| C(14)-C(15)      | 1.3936(19) |
| C(15)-C(16)      | 1.3930(19) |
| C(16)-C(17)      | 1.3984(19) |
| C(17)-C(18)      | 1.3885(19) |
|                  |            |
| C(2)-O(2)-C(19)  | 116.88(11) |
| C(15)-O(3)-C(20) | 115.89(11) |
| C(16)-O(4)-C(21) | 113.03(11) |
| C(17)-O(5)-C(22) | 116.09(11) |

|                   |            |
|-------------------|------------|
| O(1)-C(1)-C(6)    | 118.07(12) |
| O(1)-C(1)-C(2)    | 120.53(12) |
| C(6)-C(1)-C(2)    | 121.40(12) |
| O(2)-C(2)-C(3)    | 125.67(12) |
| O(2)-C(2)-C(1)    | 114.33(11) |
| C(3)-C(2)-C(1)    | 120.00(12) |
| C(2)-C(3)-C(4)    | 118.93(12) |
| C(3)-C(4)-C(5)    | 121.79(12) |
| C(4)-C(5)-C(6)    | 119.35(12) |
| C(4)-C(5)-C(12)   | 120.49(12) |
| C(6)-C(5)-C(12)   | 120.13(12) |
| C(1)-C(6)-C(5)    | 118.41(12) |
| C(1)-C(6)-C(7)    | 118.32(12) |
| C(5)-C(6)-C(7)    | 123.24(12) |
| C(6)-C(7)-C(8)    | 114.57(11) |
| C(9)-C(8)-C(7)    | 115.49(12) |
| C(8)-C(9)-C(10)   | 114.38(12) |
| C(11)-C(10)-C(9)  | 112.05(12) |
| C(12)-C(11)-C(10) | 126.89(13) |
| C(11)-C(12)-C(13) | 120.66(13) |
| C(11)-C(12)-C(5)  | 120.88(12) |
| C(13)-C(12)-C(5)  | 118.32(12) |
| C(14)-C(13)-C(18) | 119.23(12) |
| C(14)-C(13)-C(12) | 120.18(12) |
| C(18)-C(13)-C(12) | 120.46(12) |
| C(15)-C(14)-C(13) | 120.36(12) |
| O(3)-C(15)-C(16)  | 116.20(12) |
| O(3)-C(15)-C(14)  | 123.22(12) |
| C(16)-C(15)-C(14) | 120.56(12) |
| O(4)-C(16)-C(15)  | 120.31(12) |
| O(4)-C(16)-C(17)  | 120.79(12) |
| C(15)-C(16)-C(17) | 118.82(12) |
| O(5)-C(17)-C(18)  | 123.93(12) |
| O(5)-C(17)-C(16)  | 115.24(12) |
| C(18)-C(17)-C(16) | 120.83(12) |
| C(17)-C(18)-C(13) | 120.11(13) |

---

Symmetry transformations used to generate equivalent atoms:

Table 8. Anisotropic displacement parameters ( $\text{\AA}^2 \times 10^3$ ) for Compound 23. The anisotropic displacement factor exponent takes the form:  $-2p^2[ h^2 a^* U^{11} + \dots + 2 h k a^* b^* U^{12} ]$

|       | U <sup>11</sup> | U <sup>22</sup> | U <sup>33</sup> | U <sup>23</sup> | U <sup>13</sup> | U <sup>12</sup> |
|-------|-----------------|-----------------|-----------------|-----------------|-----------------|-----------------|
| O(1)  | 36(1)           | 37(1)           | 24(1)           | -7(1)           | -8(1)           | 10(1)           |
| O(2)  | 32(1)           | 32(1)           | 31(1)           | -6(1)           | -4(1)           | 9(1)            |
| O(3)  | 28(1)           | 27(1)           | 35(1)           | 3(1)            | -3(1)           | -2(1)           |
| O(4)  | 26(1)           | 37(1)           | 34(1)           | -2(1)           | -8(1)           | -4(1)           |
| O(5)  | 31(1)           | 41(1)           | 26(1)           | 7(1)            | -8(1)           | -2(1)           |
| C(1)  | 23(1)           | 32(1)           | 21(1)           | -4(1)           | 1(1)            | 0(1)            |
| C(2)  | 22(1)           | 28(1)           | 26(1)           | -1(1)           | 2(1)            | 1(1)            |
| C(3)  | 28(1)           | 29(1)           | 26(1)           | -6(1)           | 3(1)            | 0(1)            |
| C(4)  | 28(1)           | 33(1)           | 22(1)           | -3(1)           | -2(1)           | -3(1)           |
| C(5)  | 20(1)           | 31(1)           | 24(1)           | -1(1)           | 2(1)            | -2(1)           |
| C(6)  | 20(1)           | 31(1)           | 24(1)           | -4(1)           | 2(1)            | 0(1)            |
| C(7)  | 27(1)           | 36(1)           | 24(1)           | -4(1)           | 0(1)            | 7(1)            |
| C(8)  | 29(1)           | 39(1)           | 35(1)           | -14(1)          | -4(1)           | 4(1)            |
| C(9)  | 31(1)           | 34(1)           | 42(1)           | -8(1)           | 2(1)            | -5(1)           |
| C(10) | 30(1)           | 36(1)           | 34(1)           | -1(1)           | 2(1)            | -4(1)           |
| C(11) | 27(1)           | 34(1)           | 27(1)           | 0(1)            | -1(1)           | 0(1)            |
| C(12) | 24(1)           | 33(1)           | 21(1)           | -2(1)           | 0(1)            | 0(1)            |
| C(13) | 25(1)           | 29(1)           | 23(1)           | -5(1)           | 0(1)            | 2(1)            |
| C(14) | 26(1)           | 27(1)           | 24(1)           | -1(1)           | -3(1)           | 4(1)            |
| C(15) | 27(1)           | 25(1)           | 23(1)           | -3(1)           | 1(1)            | 0(1)            |
| C(16) | 24(1)           | 29(1)           | 24(1)           | -7(1)           | -4(1)           | -1(1)           |
| C(17) | 29(1)           | 31(1)           | 19(1)           | -3(1)           | -4(1)           | 2(1)            |
| C(18) | 29(1)           | 30(1)           | 22(1)           | -1(1)           | 0(1)            | -2(1)           |
| C(19) | 39(1)           | 34(1)           | 43(1)           | -10(1)          | -4(1)           | 11(1)           |
| C(20) | 37(1)           | 27(1)           | 30(1)           | 1(1)            | -2(1)           | 2(1)            |
| C(21) | 25(1)           | 48(1)           | 38(1)           | 7(1)            | -4(1)           | 2(1)            |
| C(22) | 42(1)           | 33(1)           | 31(1)           | 5(1)            | -11(1)          | -3(1)           |

Table 9. Hydrogen bonds for Compound 23 [ $\text{\AA}$  and  $^\circ$ ].

| D-H...A            | d(D-H)    | d(H...A)  | d(D...A)   | $\angle(\text{DHA})$ |
|--------------------|-----------|-----------|------------|----------------------|
| O(1)-H(1)...O(2)   | 0.879(19) | 2.202(18) | 2.6623(14) | 112.3(15)            |
| O(1)-H(1)...O(3)#1 | 0.879(19) | 2.152(19) | 2.9046(14) | 143.3(16)            |

Symmetry transformations used to generate equivalent atoms:

#1  $x+1/2, y, -z+1/2$

Crystallographic data for structure **23** (deposition number CCDC

1046344) reported in this paper have been deposited with the Cambridge

Crystallographic Data Centre. Copies of the data can be obtained, free of charge, on

application to the Director, CCDC, 12 Union Road, Cambridge CB2 1EZ, UK (fax: +44-

(0) 1223-336033 or e-mail: [deposit@ccdc.cam.ac.uk](mailto:deposit@ccdc.cam.ac.uk)).



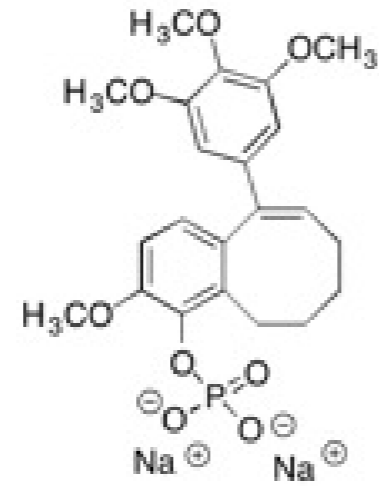

**24**

6.701  
6.687  
6.518  
6.482  
6.468  
6.210  
6.197  
6.183  
3.723  
3.665  
3.631  
3.479  
3.465  
3.457  
3.444  
2.163  
2.149  
2.140  
2.128  
2.120  
2.115  
2.073  
2.053  
2.033  
1.919  
1.909  
1.909  
1.905  
1.897  
1.819  
1.641  
1.640  
1.634  
1.625  
1.620  
1.615  
1.612  
1.606  
1.605  
1.463  
1.443  
1.426  
1.406  
1.341  
1.333  
1.333  
1.319  
1.313  
1.313  
1.298  
1.292  
1.278  
1.278  
1.274  
1.271  
1.206  
1.198  
1.184  
1.177  
1.163  
1.157  
1.144  
1.139  
1.136

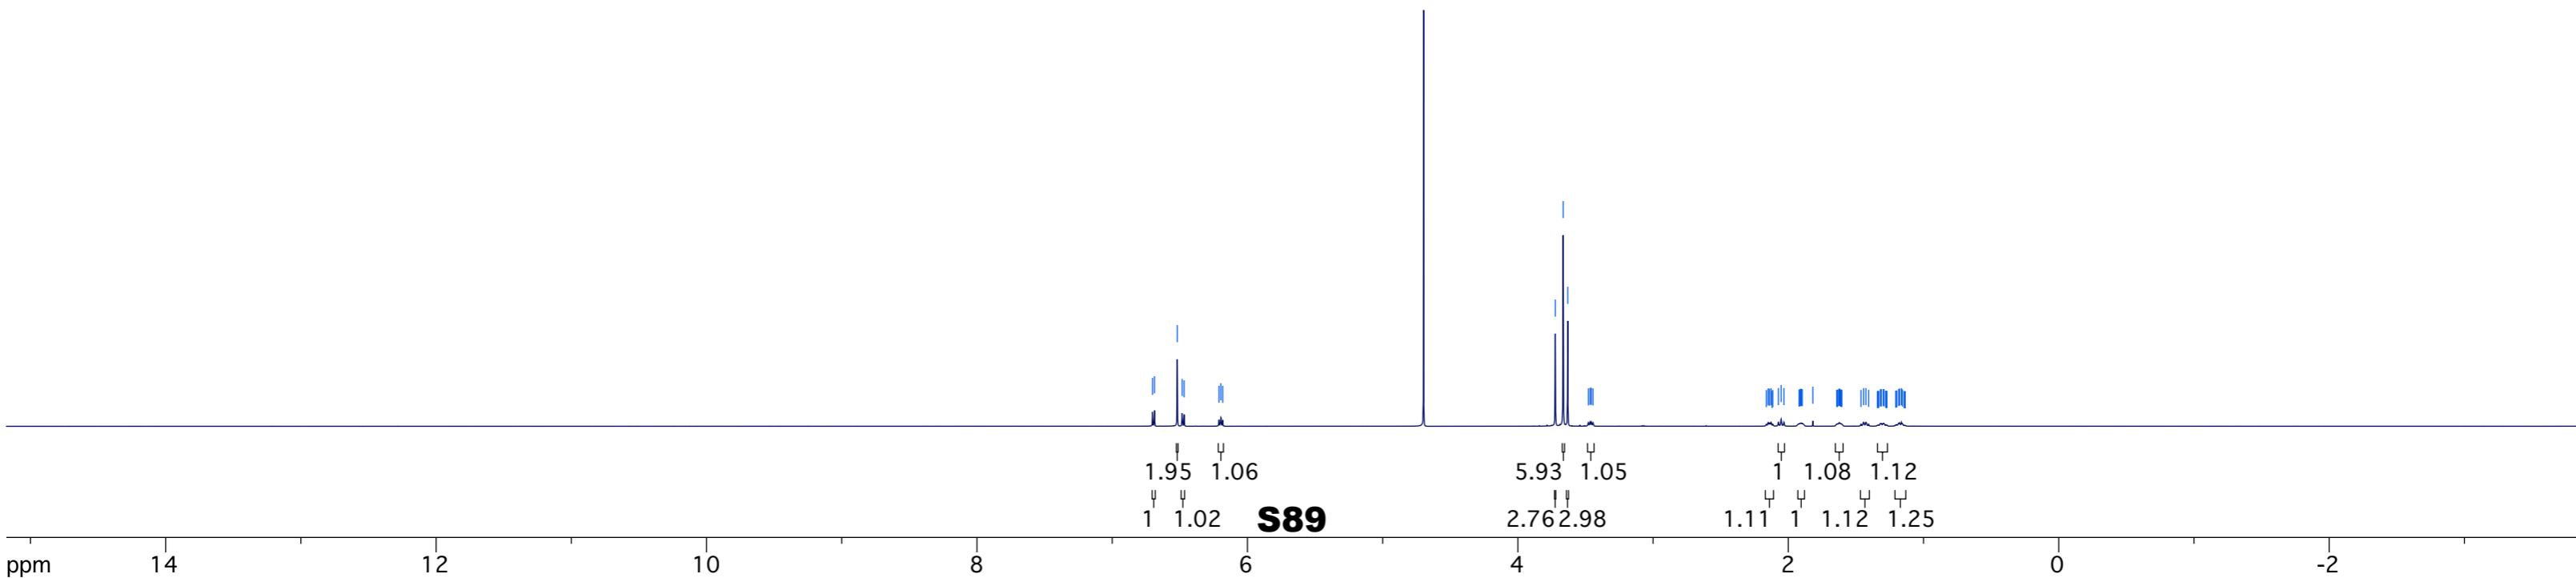

**S89**

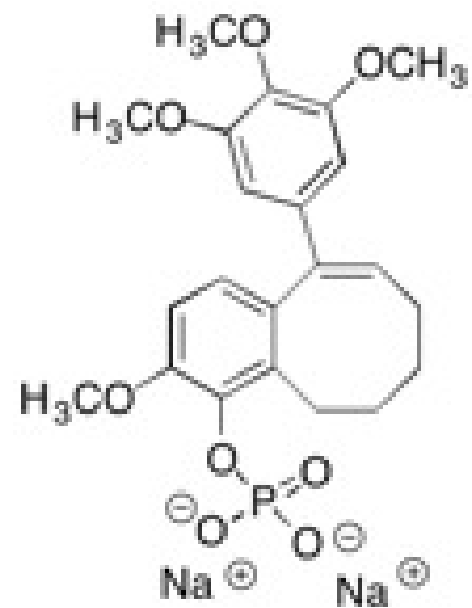

**24**

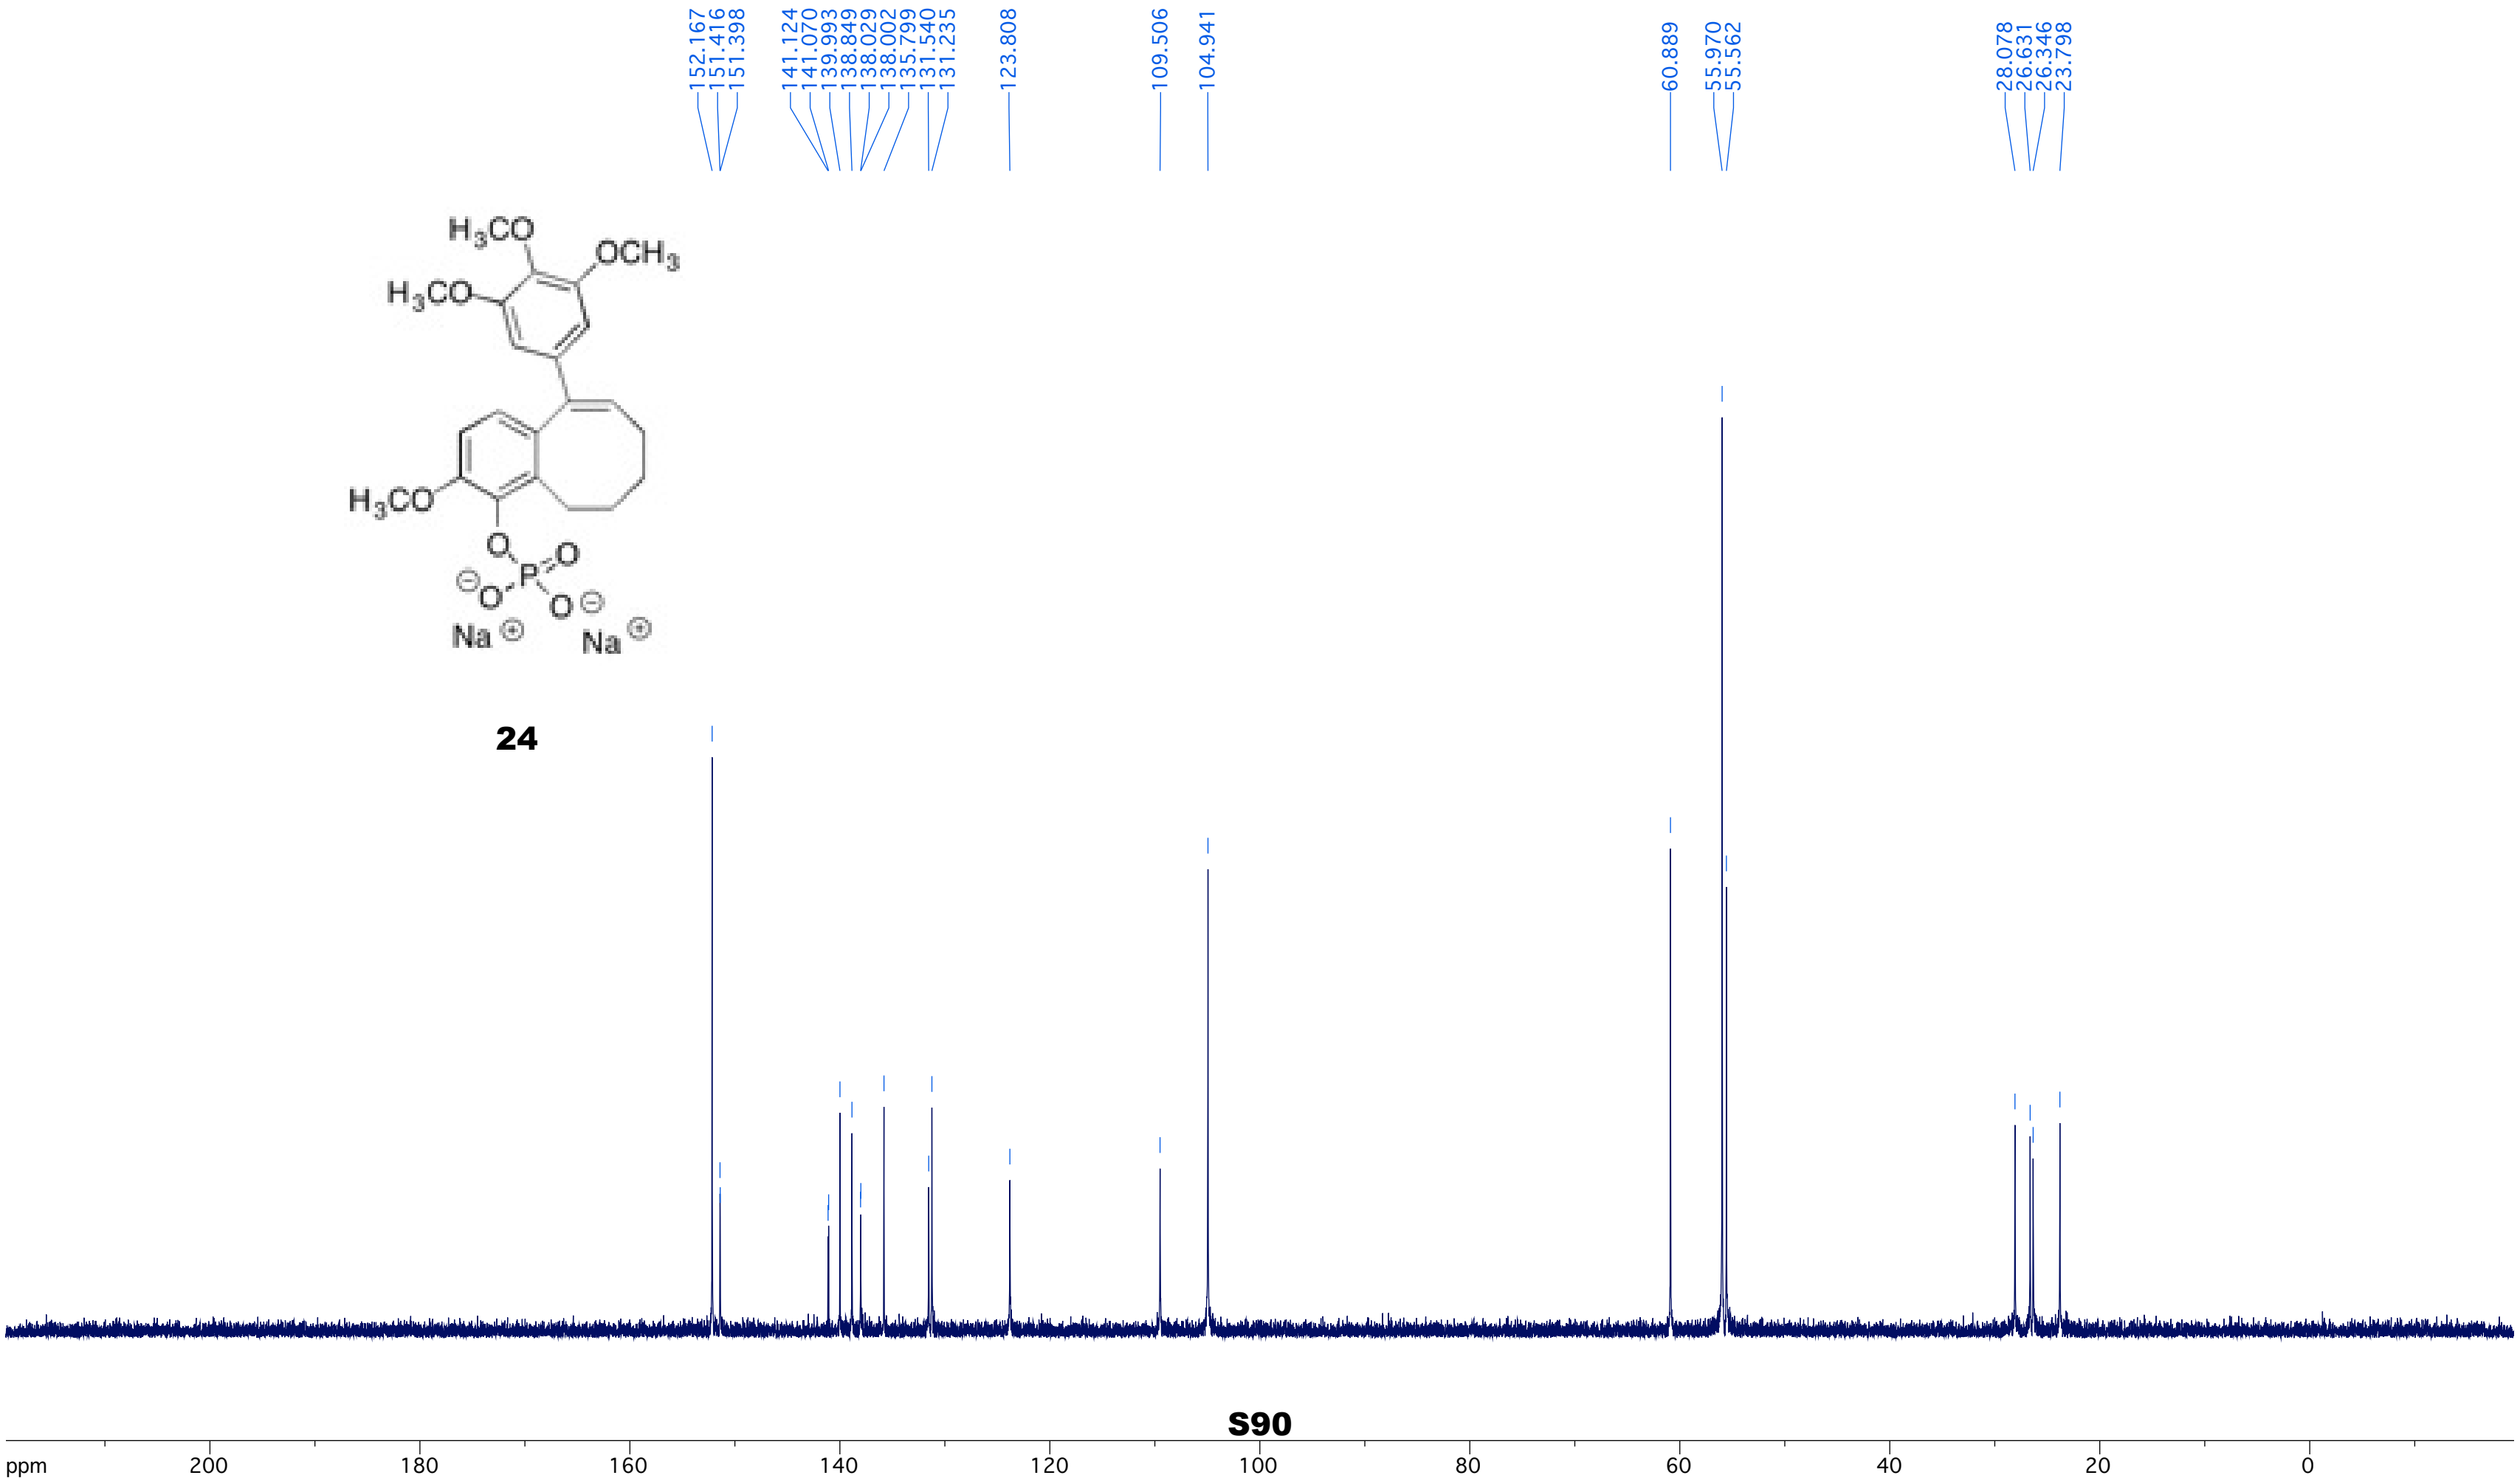

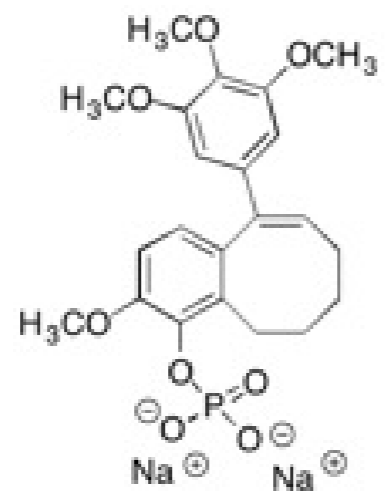

**24**

-0.247

**S91**

ppm

100

50

-0

-50

-100

-150

-200

Sample Name: CAH\_5\_150

=====

Acq. Operator : christine  
Acq. Instrument : Instrument 1 Location : -  
Injection Date : 1/19/2016 1:07:33 PM  
Acq. Method : C:\CHEM32\1\METHODS\MASTERMETHOD.M  
Last changed : 1/19/2016 1:04:30 PM by christine  
Analysis Method : C:\CHEM32\1\DATA\CHRISTINE\CAH\_5\_15000001.D\DA.M (MASTERMETHOD.M)  
Last changed : 1/19/2016 1:58:42 PM by christine

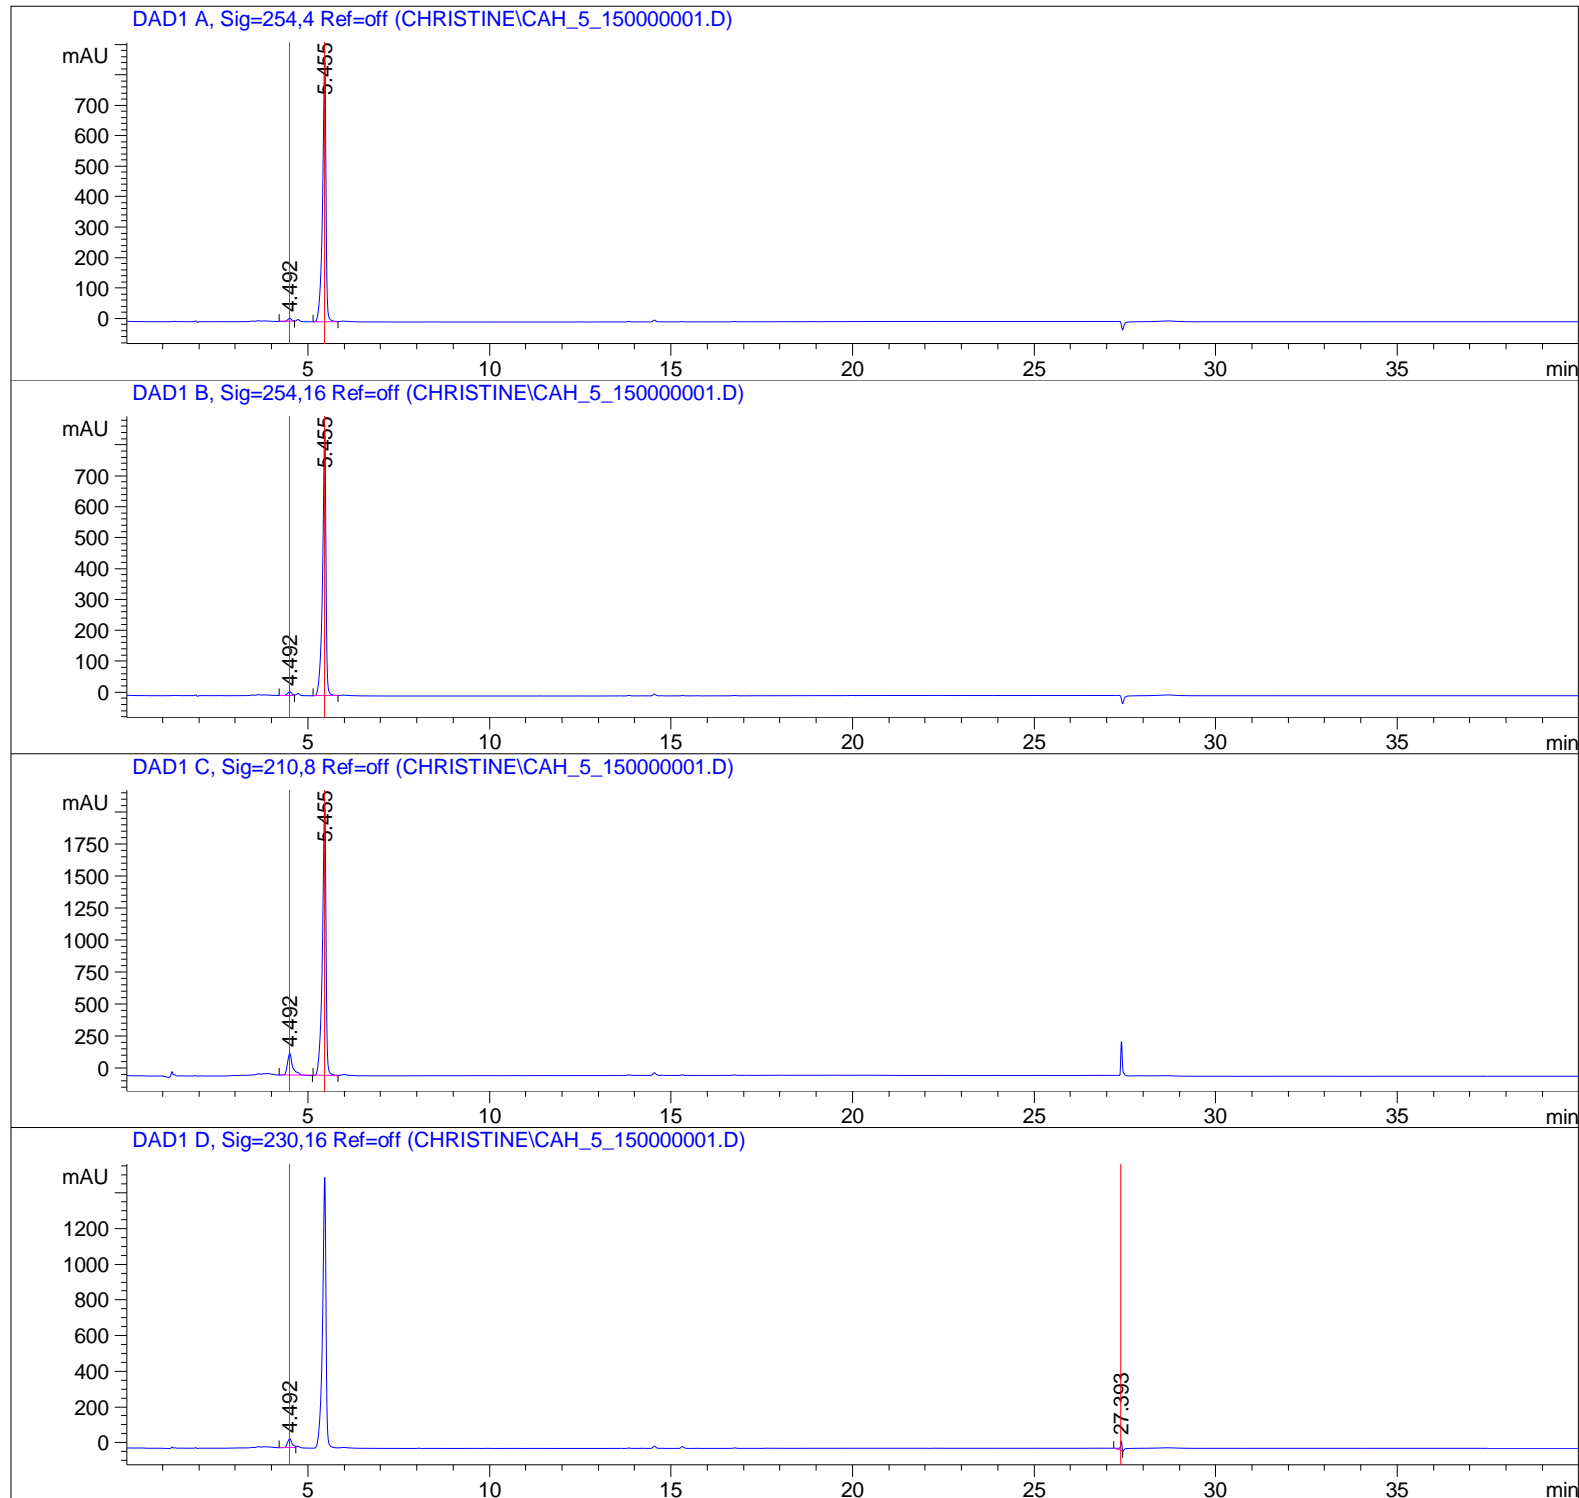

Sample Name: CAH\_5\_150

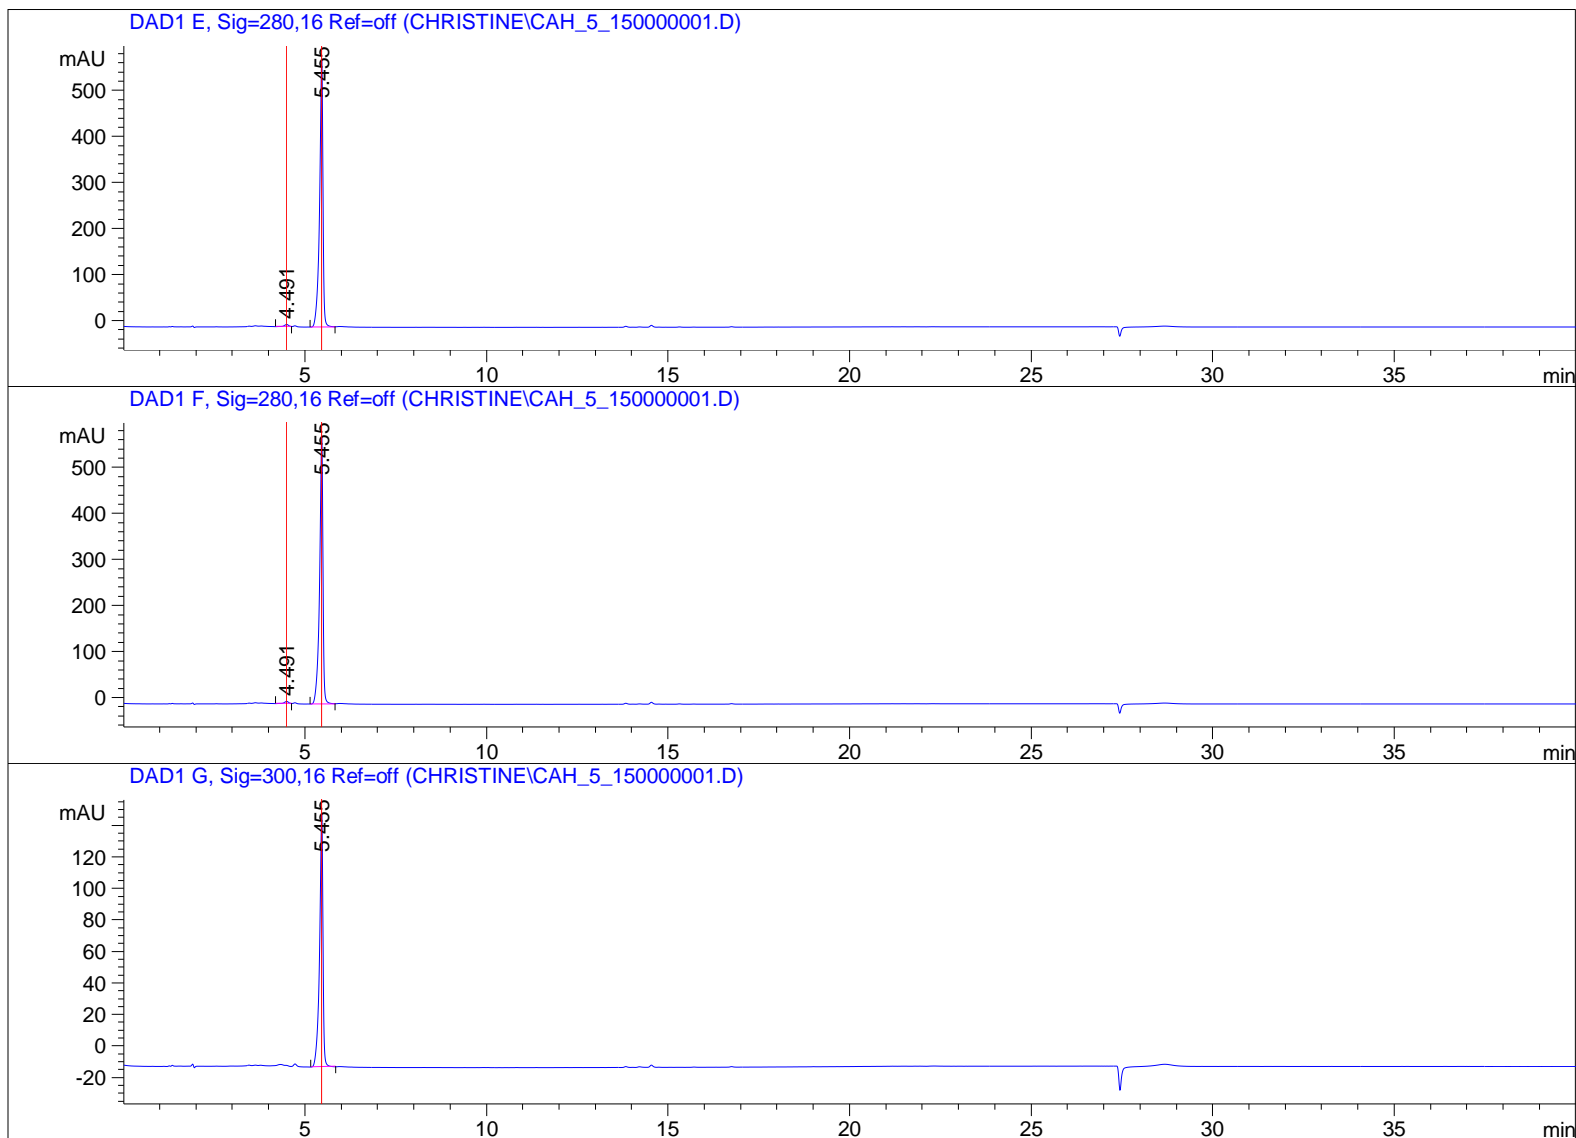

```
=====
                          Area Percent Report
=====
```

Sorted By : Signal  
Multiplier : 1.0000  
Dilution : 1.0000  
Use Multiplier & Dilution Factor with ISTDs

Signal 1: DAD1 A, Sig=254,4 Ref=off

| Peak # | RetTime [min] | Type | Width [min] | Area [mAU*s] | Height [mAU] | Area %  |
|--------|---------------|------|-------------|--------------|--------------|---------|
| 1      | 4.492         | BV   | 0.1295      | 91.48150     | 10.72987     | 1.5876  |
| 2      | 5.455         | BV   | 0.0955      | 5670.79883   | 876.42407    | 98.4124 |

Totals : 5762.28033 887.15394

Sample Name: CAH\_5\_150

Signal 2: DAD1 B, Sig=254,16 Ref=off

| Peak # | RetTime [min] | Type | Width [min] | Area [mAU*s] | Height [mAU] | Area %  |
|--------|---------------|------|-------------|--------------|--------------|---------|
| 1      | 4.492         | BV   | 0.1298      | 105.85542    | 12.38030     | 1.8594  |
| 2      | 5.455         | BV   | 0.0955      | 5587.14062   | 863.45483    | 98.1406 |

Totals :                                   5692.99605   875.83513

Signal 3: DAD1 C, Sig=210,8 Ref=off

| Peak # | RetTime [min] | Type | Width [min] | Area [mAU*s] | Height [mAU] | Area %  |
|--------|---------------|------|-------------|--------------|--------------|---------|
| 1      | 4.492         | BB   | 0.1491      | 1733.28137   | 172.71095    | 10.5676 |
| 2      | 5.455         | BV   | 0.1022      | 1.46685e4    | 2132.77539   | 89.4324 |

Totals :                                   1.64018e4   2305.48634

Signal 4: DAD1 D, Sig=230,16 Ref=off

| Peak # | RetTime [min] | Type | Width [min] | Area [mAU*s] | Height [mAU] | Area %  |
|--------|---------------|------|-------------|--------------|--------------|---------|
| 1      | 4.492         | BV   | 0.1383      | 472.28870    | 51.84144     | 70.2817 |
| 2      | 27.393        | BB   | 0.0564      | 199.70493    | 52.48211     | 29.7183 |

Totals :                                   671.99362   104.32355

Signal 5: DAD1 E, Sig=280,16 Ref=off

| Peak # | RetTime [min] | Type | Width [min] | Area [mAU*s] | Height [mAU] | Area %  |
|--------|---------------|------|-------------|--------------|--------------|---------|
| 1      | 4.491         | BV   | 0.1358      | 47.16594     | 5.10381      | 1.2332  |
| 2      | 5.455         | BV   | 0.0956      | 3777.51514   | 583.23889    | 98.7668 |

Totals :                                   3824.68107   588.34271

Sample Name: CAH\_5\_150

Signal 6: DAD1 F, Sig=280,16 Ref=off

| Peak # | RetTime [min] | Type | Width [min] | Area [mAU*s] | Height [mAU] | Area %  |
|--------|---------------|------|-------------|--------------|--------------|---------|
| 1      | 4.491         | BV   | 0.1358      | 47.16594     | 5.10381      | 1.2332  |
| 2      | 5.455         | BV   | 0.0956      | 3777.51514   | 583.23889    | 98.7668 |

Totals : 3824.68107 588.34271

Signal 7: DAD1 G, Sig=300,16 Ref=off

| Peak # | RetTime [min] | Type | Width [min] | Area [mAU*s] | Height [mAU] | Area %   |
|--------|---------------|------|-------------|--------------|--------------|----------|
| 1      | 5.455         | BB   | 0.0960      | 1050.76099   | 161.39412    | 100.0000 |

Totals : 1050.76099 161.39412

=====  
\*\*\* End of Report \*\*\*

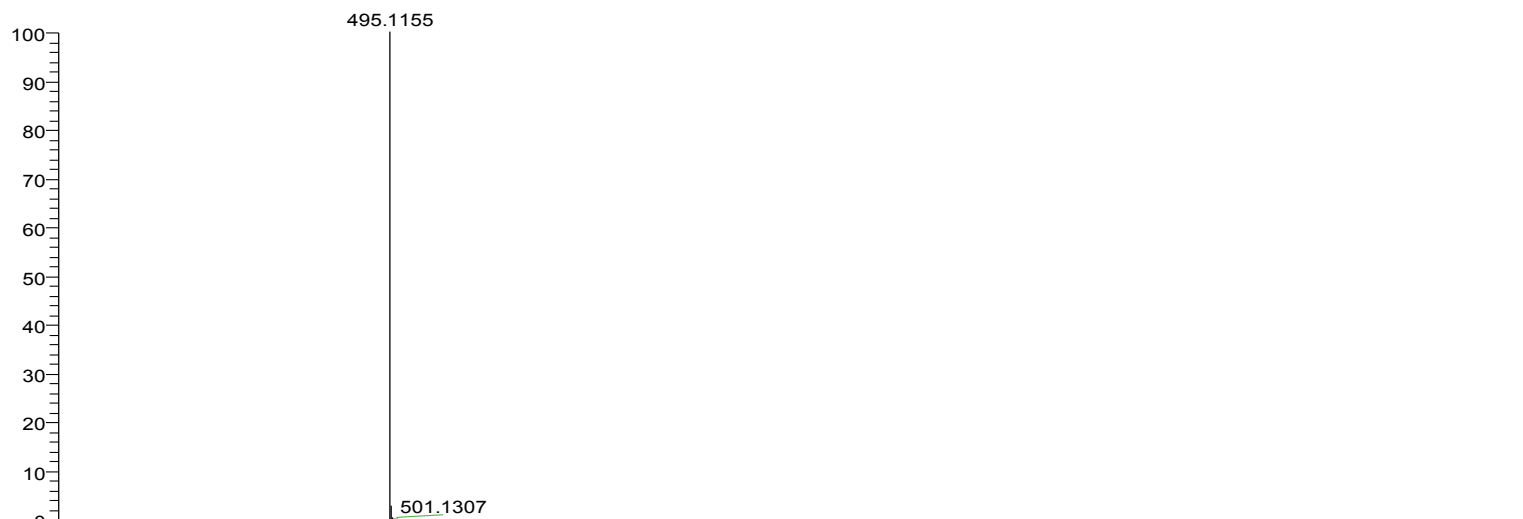

NL:  
7.72E5  
C<sub>22</sub>H<sub>26</sub>O<sub>8</sub>Na<sub>2</sub>P:  
C<sub>22</sub>H<sub>26</sub>O<sub>8</sub>Na<sub>2</sub>P<sub>1</sub>  
pa Chrg 1

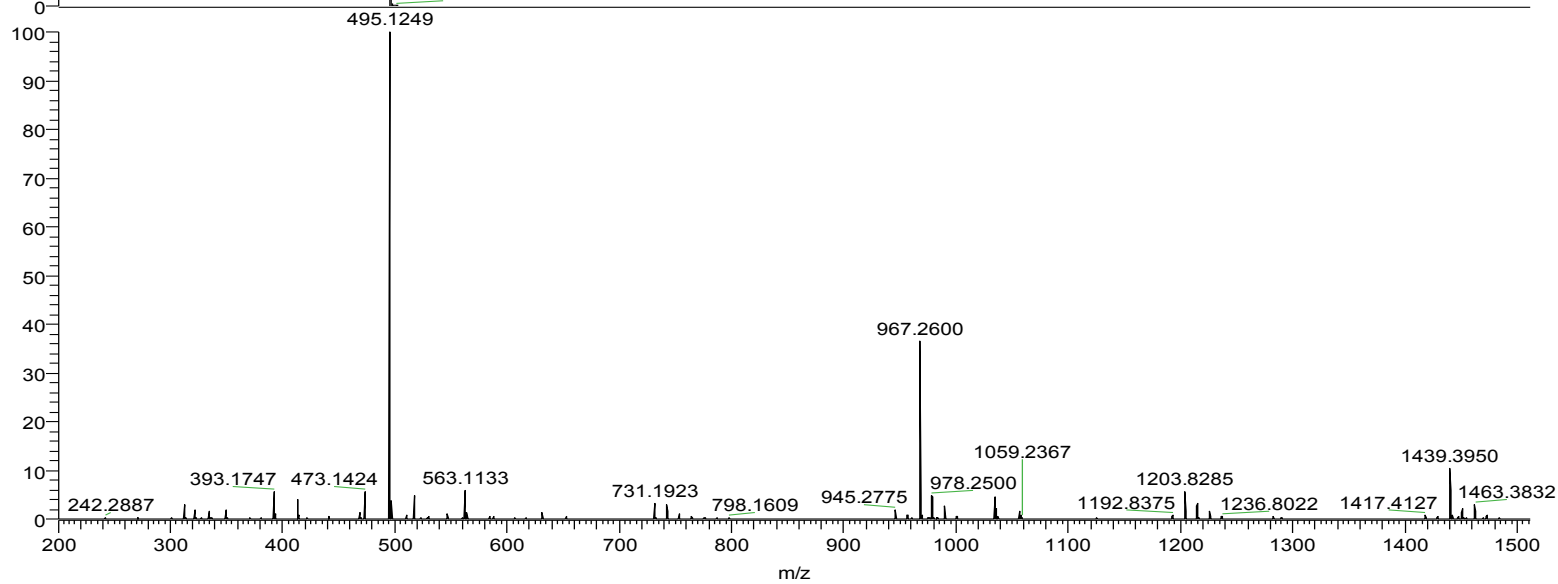

NL:  
5.70E7  
CAH\_5\_150\_Ori\_+  
ES#2-13 RT:  
0.01-0.10 AV: 12 T:  
FTMS + p ESI Full ms  
[200.00-1500.00]

**S96**



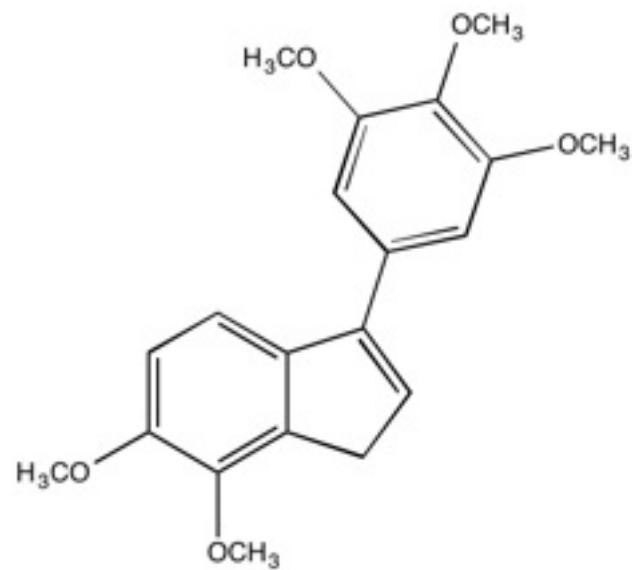

**28**

7.286  
7.270  
6.940  
6.923  
6.828  
6.441

4.124  
4.110  
3.989  
3.926  
3.913  
3.533

2.042

1.274  
1.260  
1.246

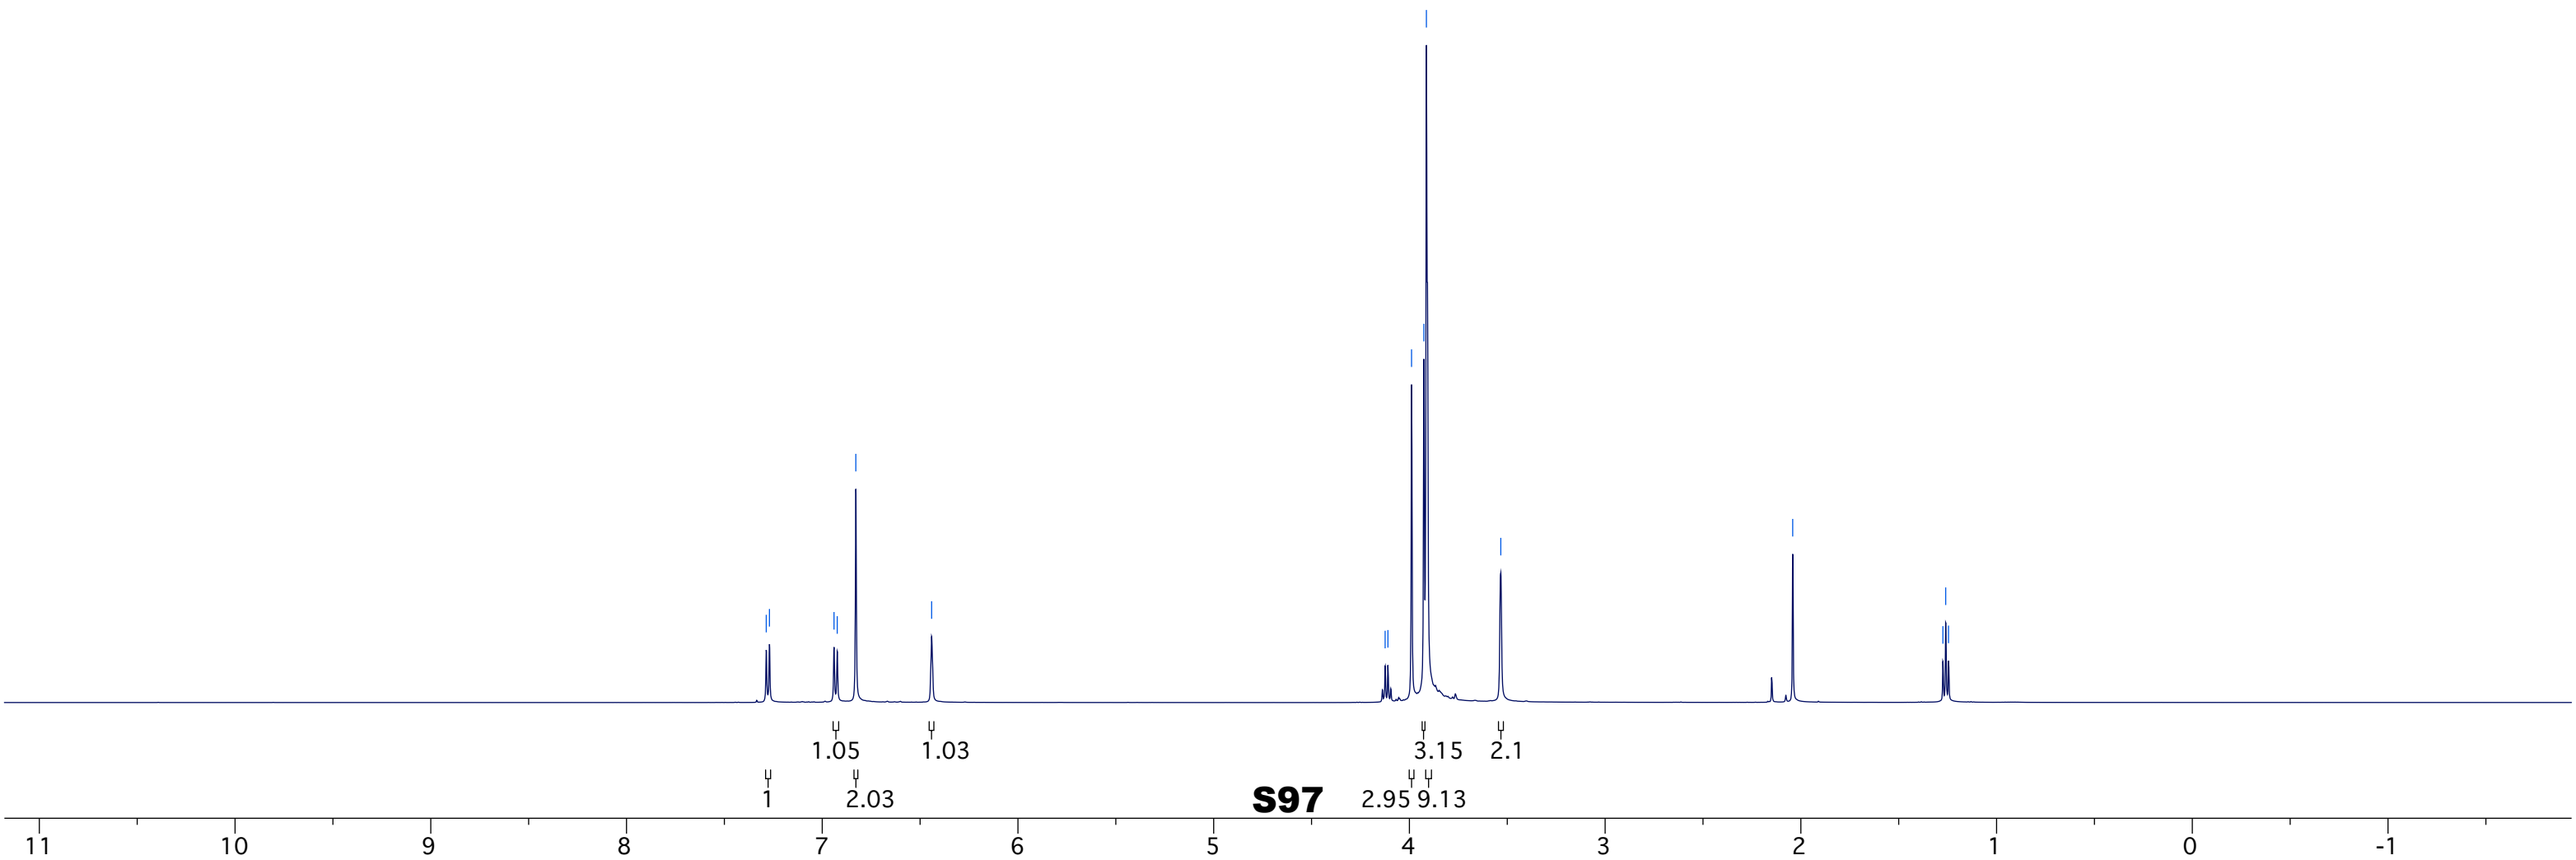

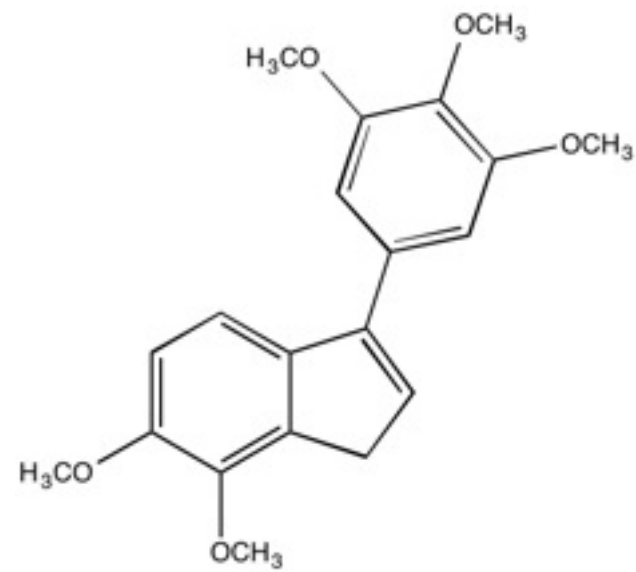

**28**

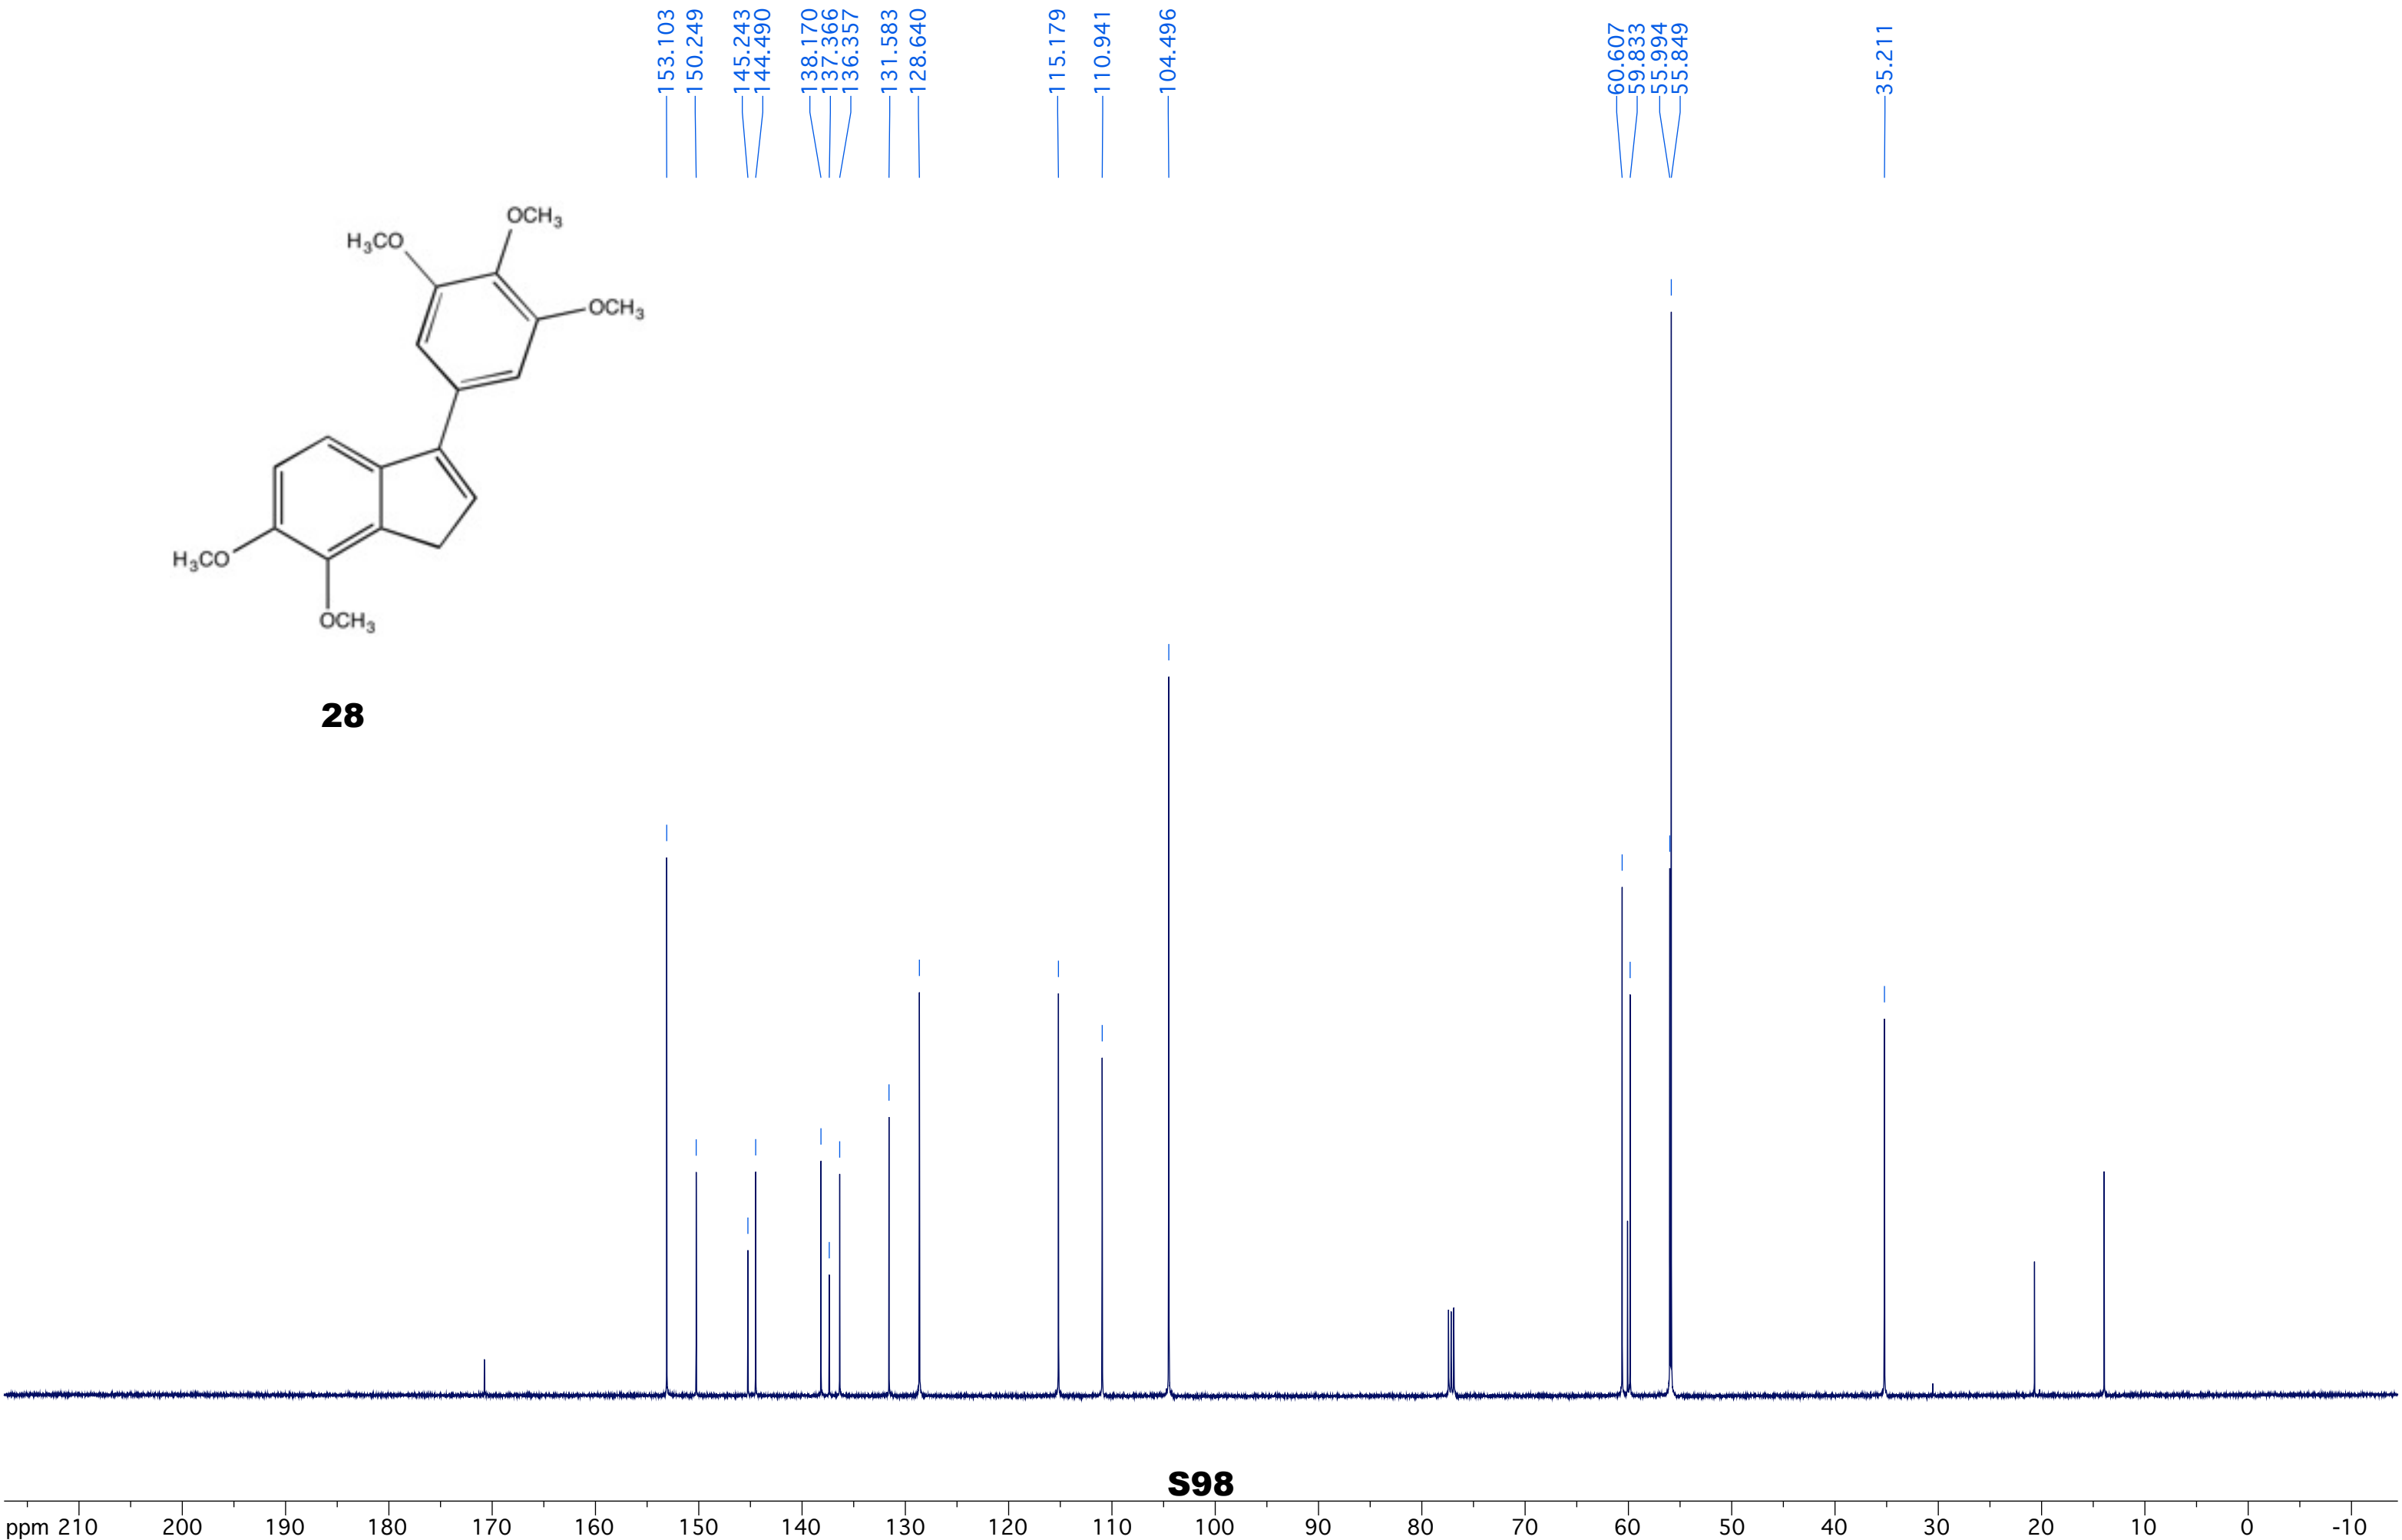

Sample Name: CAH-4-54

=====

Acq. Operator : christine  
Acq. Instrument : Instrument 1 Location : -  
Injection Date : 7/21/2014 2:36:52 PM  
Acq. Method : C:\CHEM32\1\METHODS\MASTERMETHOD.M  
Last changed : 7/21/2014 2:31:17 PM by christine  
Analysis Method : C:\CHEM32\1\DATA\CHRISTINE\CAH-4-5400002.D\DA.M (MASTERMETHOD.M)  
Last changed : 7/21/2014 4:13:46 PM by christine

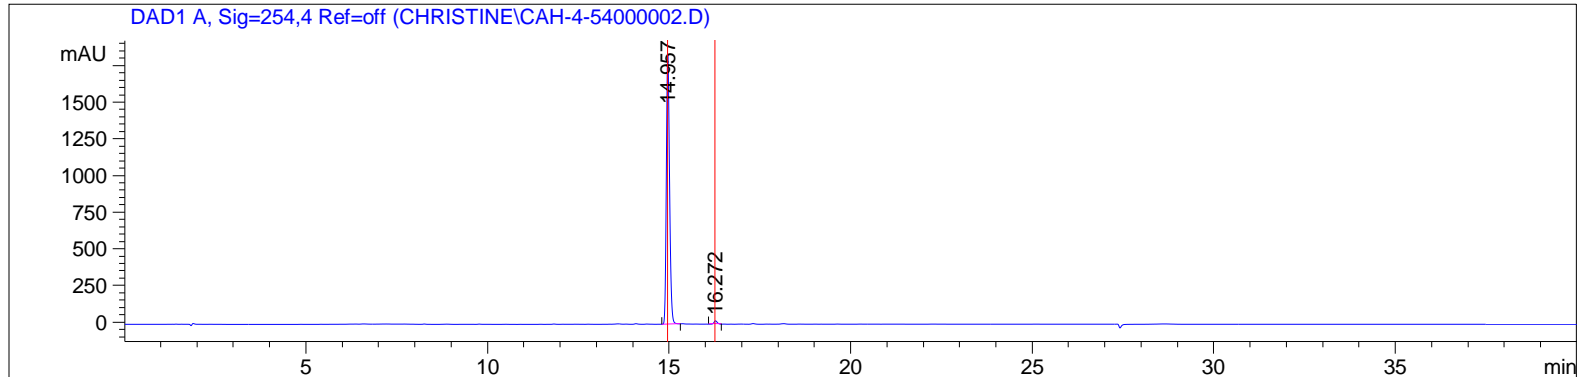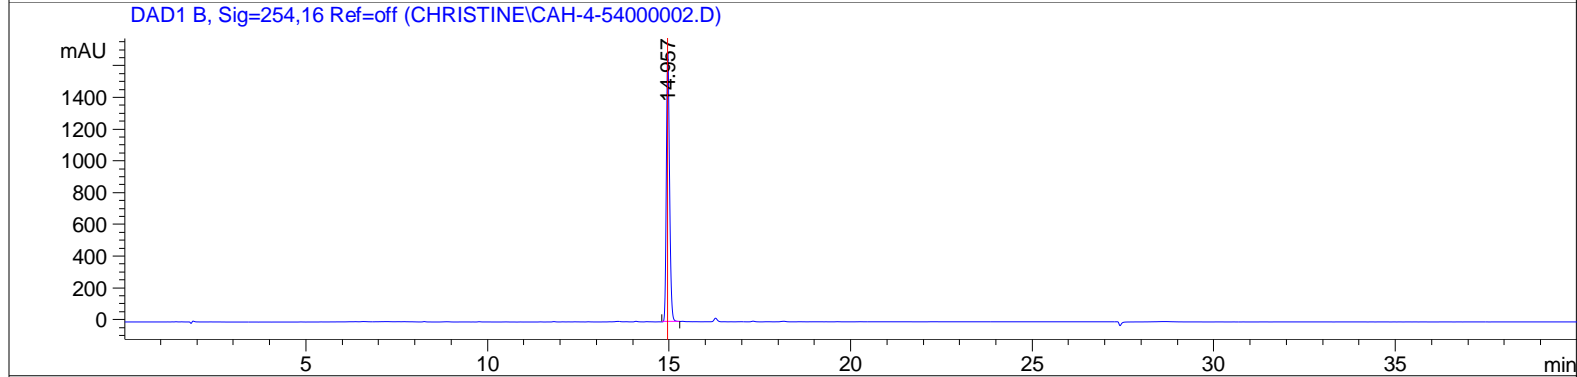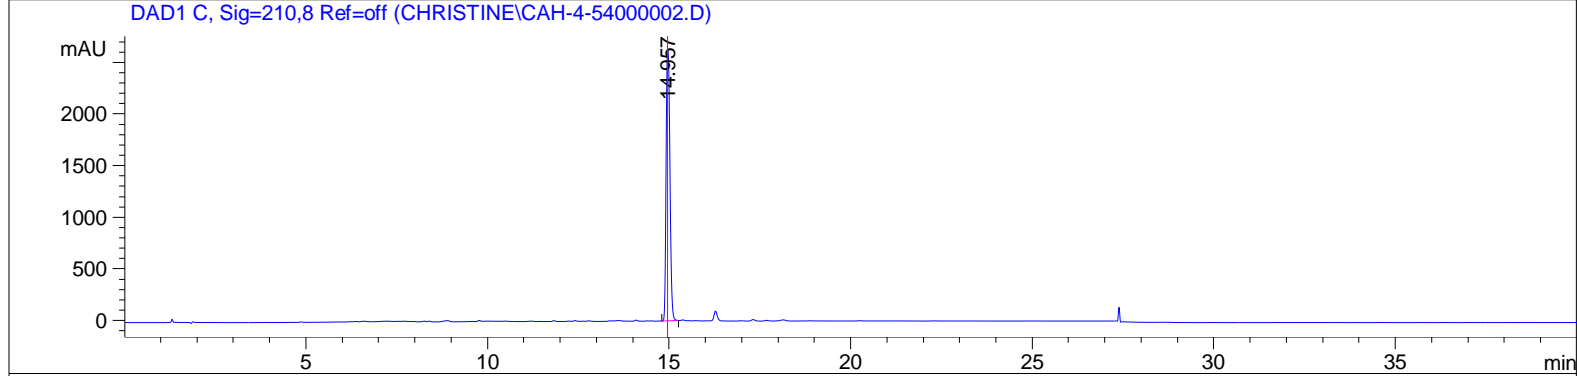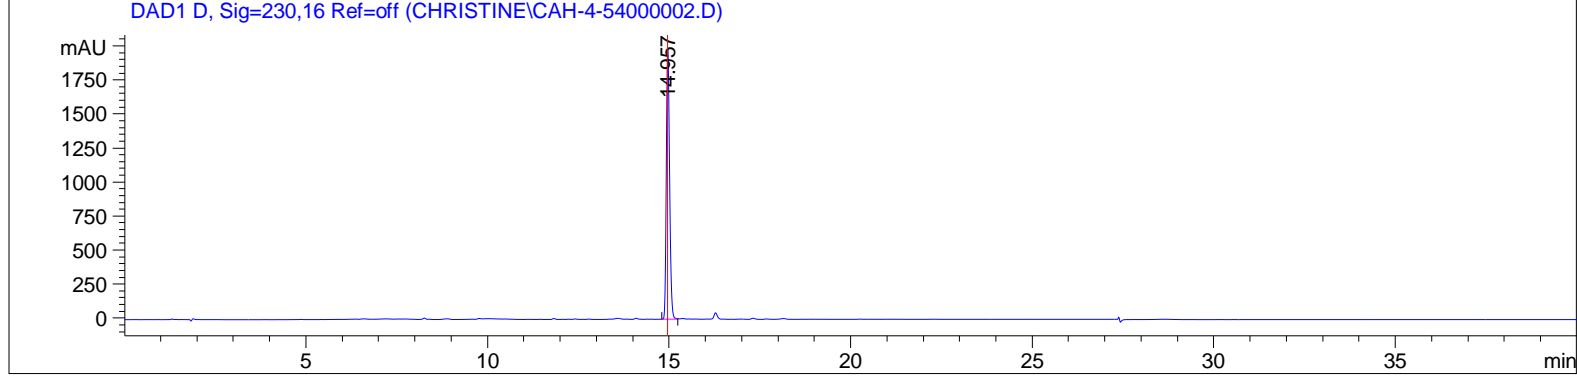

Sample Name: CAH-4-54

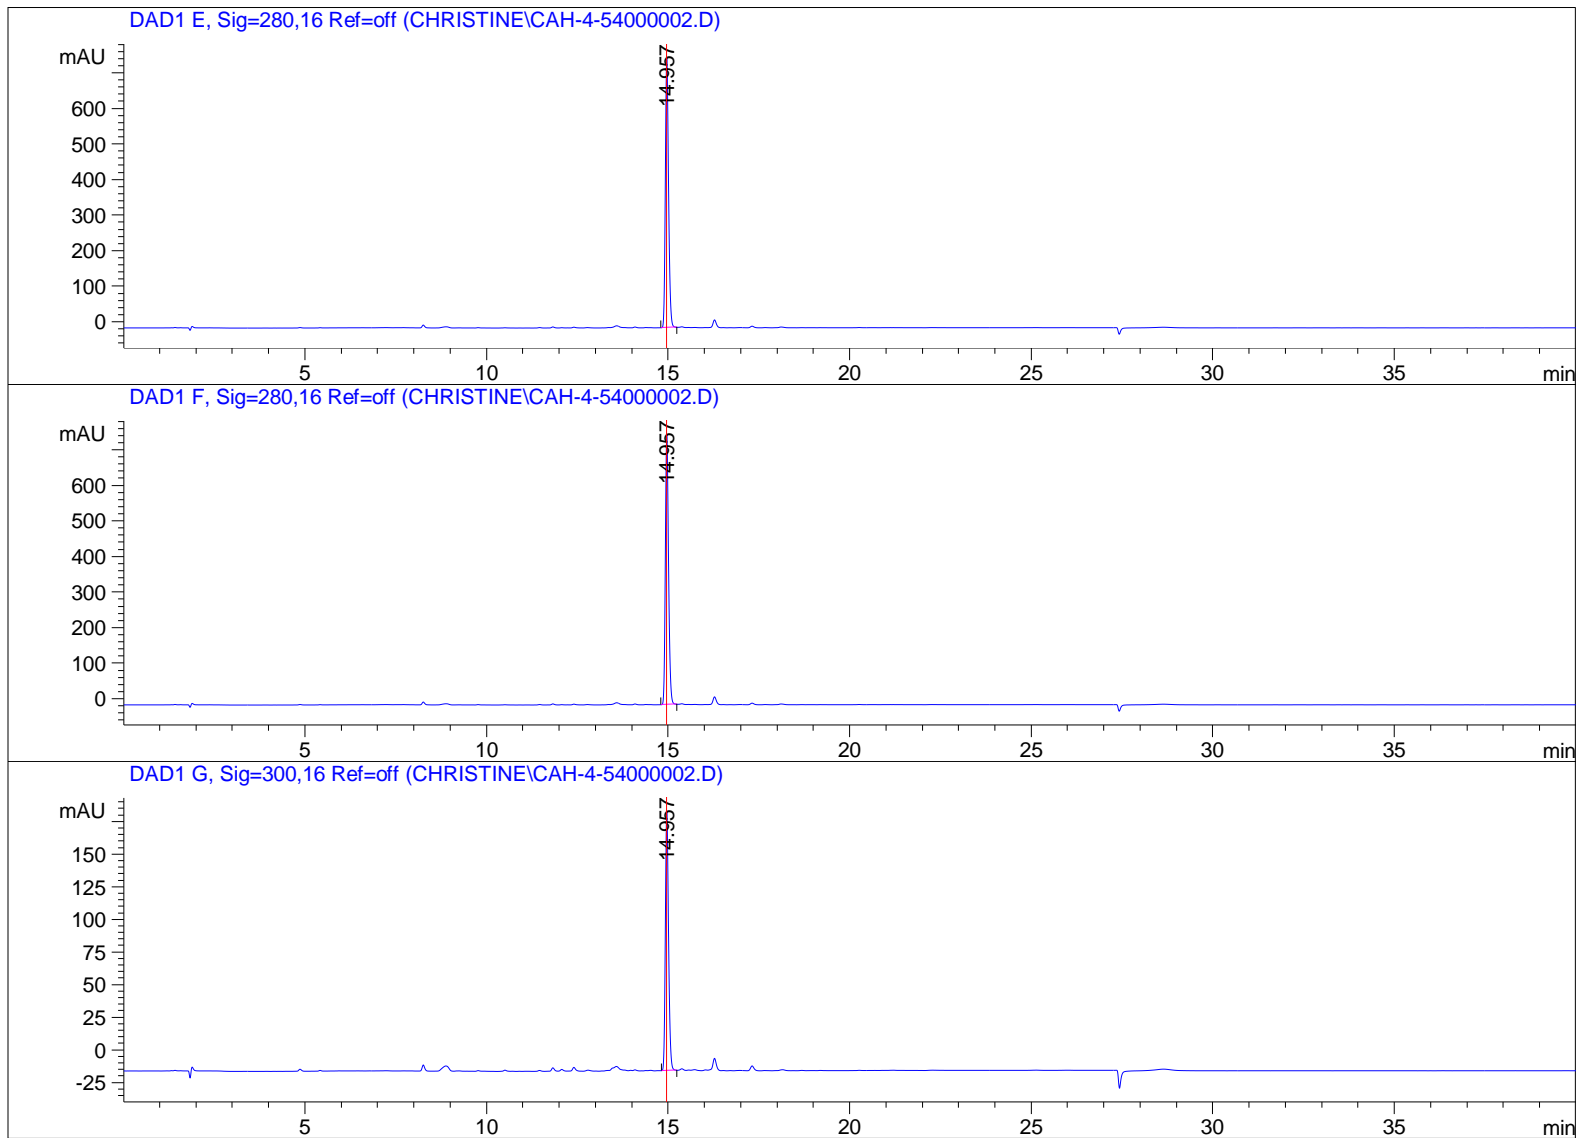

=====  
 Area Percent Report  
 =====

Sorted By : Signal  
 Multiplier : 1.0000  
 Dilution : 1.0000  
 Use Multiplier & Dilution Factor with ISTDs

Signal 1: DAD1 A, Sig=254,4 Ref=off

| Peak # | RetTime [min] | Type | Width [min] | Area [mAU*s] | Height [mAU] | Area %  |
|--------|---------------|------|-------------|--------------|--------------|---------|
| 1      | 14.957        | BV   | 0.0962      | 1.14170e4    | 1843.72681   | 98.7691 |
| 2      | 16.272        | BV   | 0.0979      | 142.28862    | 22.46073     | 1.2309  |

Totals : 1.15593e4 1866.18753

Signal 2: DAD1 B, Sig=254,16 Ref=off

| Peak # | RetTime [min] | Type | Width [min] | Area [mAU*s] | Height [mAU] | Area %   |
|--------|---------------|------|-------------|--------------|--------------|----------|
| 1      | 14.957        | BV   | 0.0960      | 1.05029e4    | 1702.27014   | 100.0000 |

Totals : 1.05029e4 1702.27014

Signal 3: DAD1 C, Sig=210,8 Ref=off

| Peak # | RetTime [min] | Type | Width [min] | Area [mAU*s] | Height [mAU] | Area %   |
|--------|---------------|------|-------------|--------------|--------------|----------|
| 1      | 14.957        | BV   | 0.1179      | 1.93357e4    | 2627.26172   | 100.0000 |

Totals : 1.93357e4 2627.26172

Signal 4: DAD1 D, Sig=230,16 Ref=off

| Peak # | RetTime [min] | Type | Width [min] | Area [mAU*s] | Height [mAU] | Area %   |
|--------|---------------|------|-------------|--------------|--------------|----------|
| 1      | 14.957        | BV   | 0.0977      | 1.25838e4    | 1992.09021   | 100.0000 |

Totals : 1.25838e4 1992.09021

Signal 5: DAD1 E, Sig=280,16 Ref=off

| Peak # | RetTime [min] | Type | Width [min] | Area [mAU*s] | Height [mAU] | Area %   |
|--------|---------------|------|-------------|--------------|--------------|----------|
| 1      | 14.957        | BB   | 0.0951      | 4634.12646   | 760.19556    | 100.0000 |

Totals : 4634.12646 760.19556

Signal 6: DAD1 F, Sig=280,16 Ref=off

| Peak # | RetTime [min] | Type | Width [min] | Area [mAU*s] | Height [mAU] | Area %   |
|--------|---------------|------|-------------|--------------|--------------|----------|
| 1      | 14.957        | BB   | 0.0951      | 4634.12646   | 760.19556    | 100.0000 |

Totals : 4634.12646 760.19556

Sample Name: CAH-4-54

Signal 7: DAD1 G, Sig=300,16 Ref=off

| Peak # | RetTime [min] | Type | Width [min] | Area [mAU*s] | Height [mAU] | Area %   |
|--------|---------------|------|-------------|--------------|--------------|----------|
| 1      | 14.957        | BB   | 0.0952      | 1213.09326   | 198.69473    | 100.0000 |

Totals : 1213.09326 198.69473

=====  
\*\*\* End of Report \*\*\*

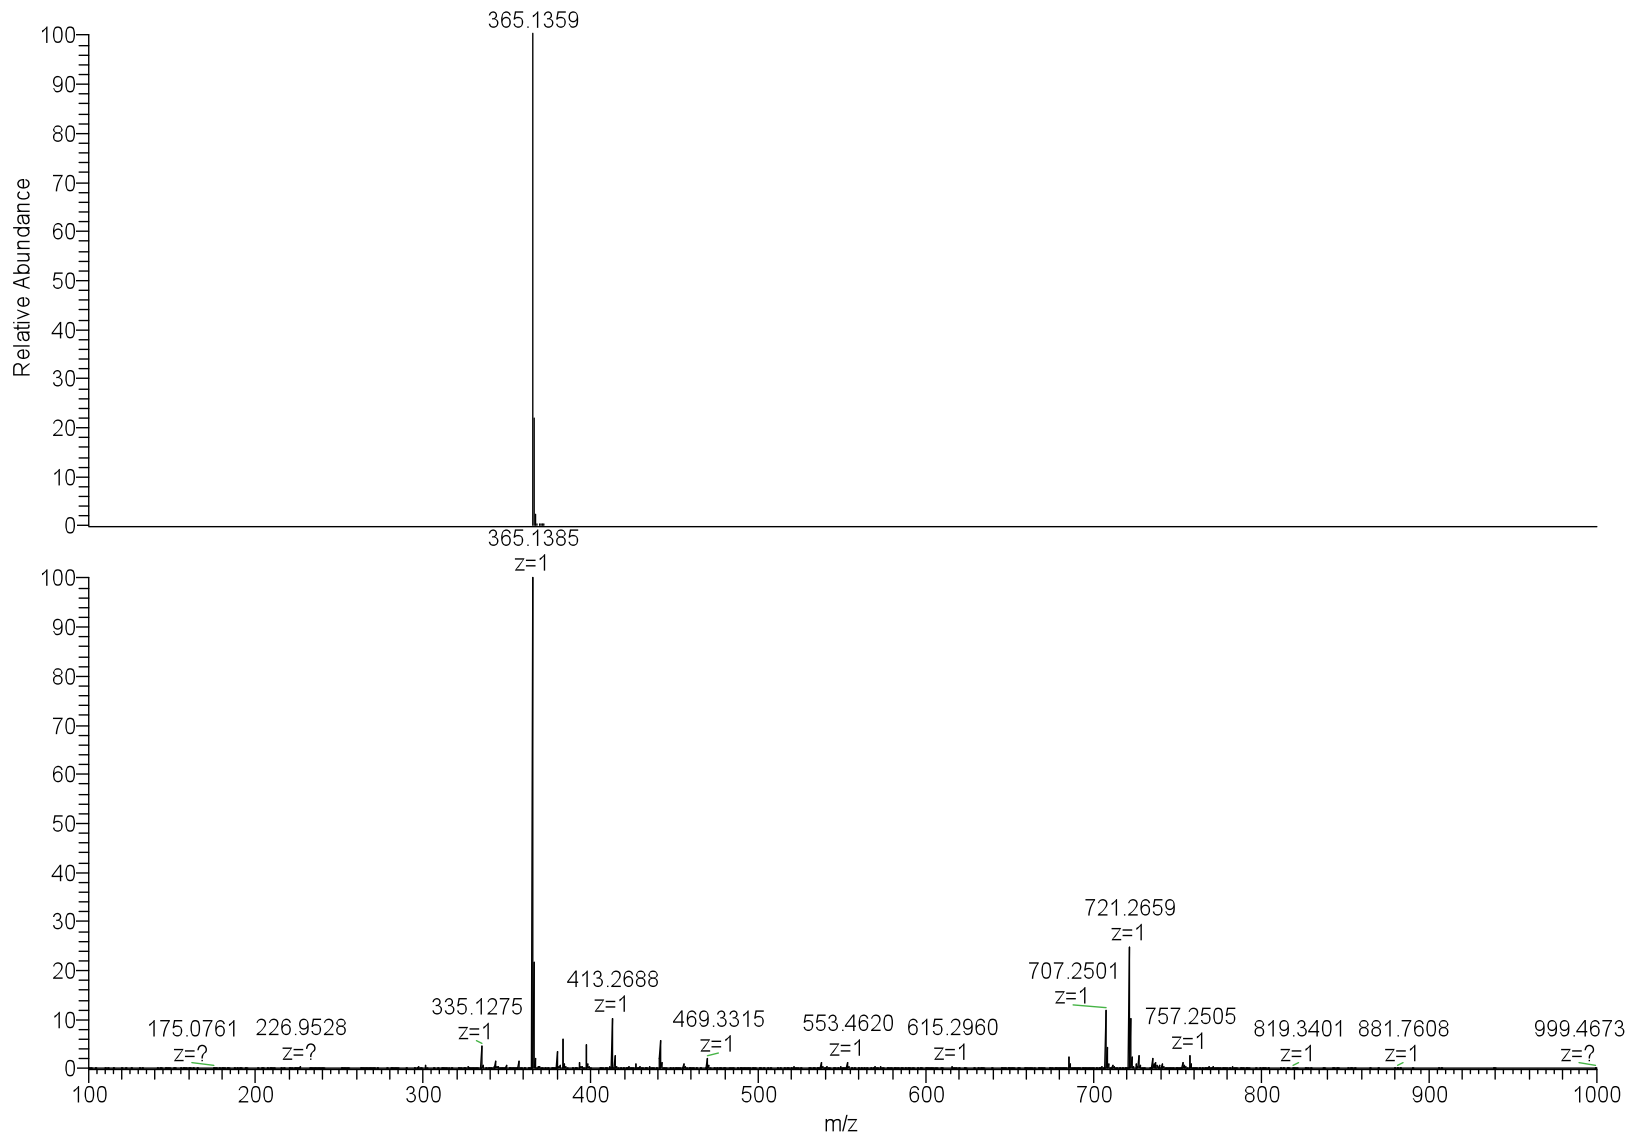

NL:  
7.95E5  
C<sub>20</sub>H<sub>22</sub>O<sub>5</sub>Na:  
C<sub>20</sub>H<sub>22</sub>O<sub>5</sub>Na<sub>1</sub>  
pa Chrg 1

NL:  
8.87E6  
CAH-4-54\_Orbi  
+ESI#1 RT: 0.01  
AV: 1 T: FTMS + p  
ESI Full ms  
[100.00-1000.00]

**S103**

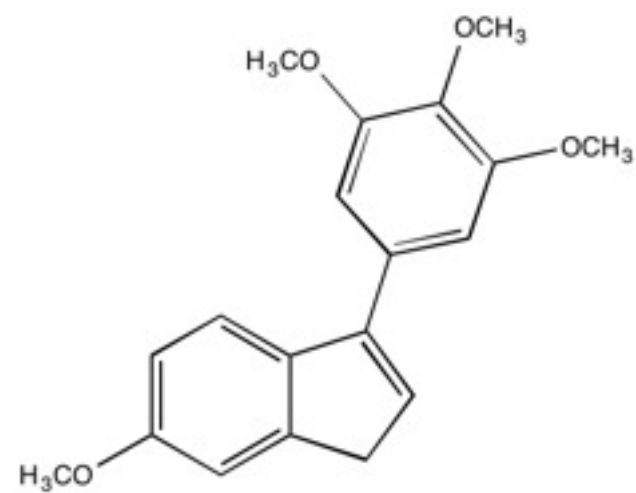

**29**

7.489  
7.472  
7.088  
7.084  
6.873  
6.869  
6.857  
6.852  
6.810  
6.386  
6.382  
6.378

3.903  
3.865  
3.788  
3.403  
3.401

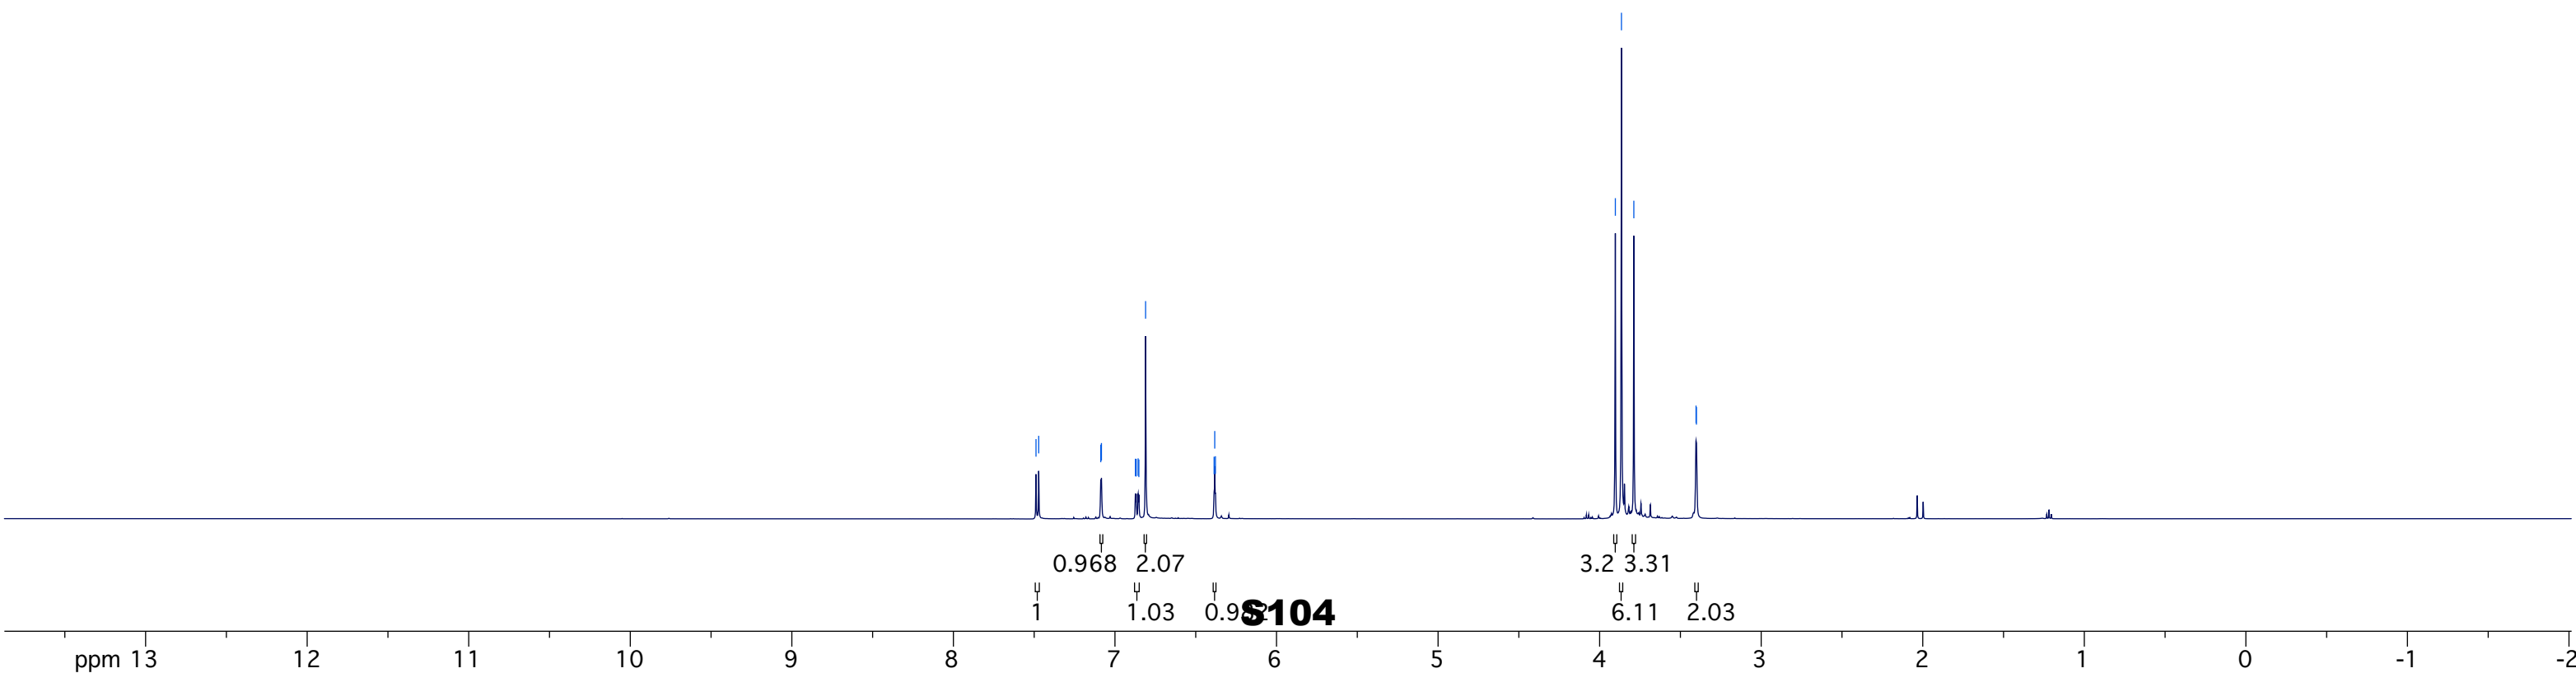



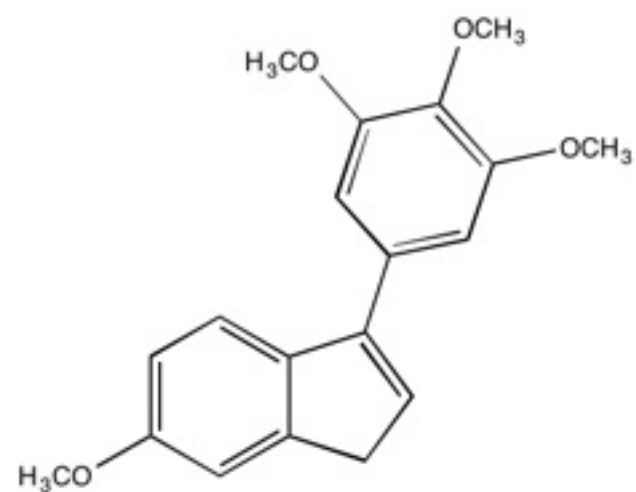

**29**

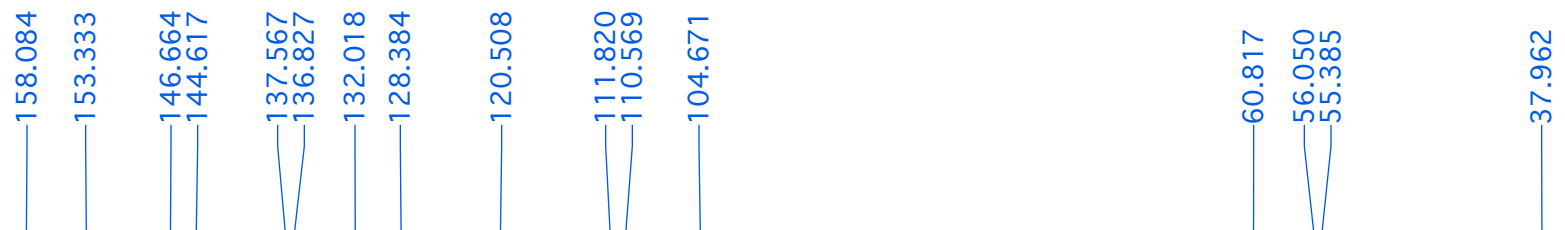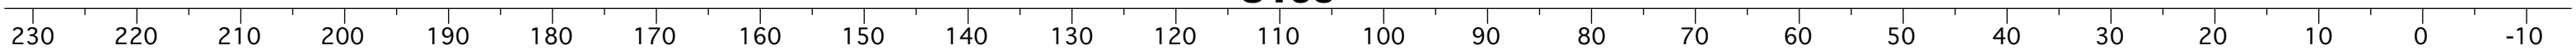

Sample Name: CAH\_4\_77

=====  
Acq. Operator : Christine  
Acq. Instrument : Instrument 1 Location : -  
Injection Date : 8/20/2014 12:17:48 PM  
Acq. Method : C:\CHEM32\1\METHODS\MASTERMETHOD.M  
Last changed : 8/20/2014 10:28:06 AM by Christine  
Analysis Method : C:\CHEM32\1\DATA\CHRISTINE\CAH\_4\_77000001.D\DA.M (MASTERMETHOD.M)  
Last changed : 8/20/2014 1:08:14 PM by Christine

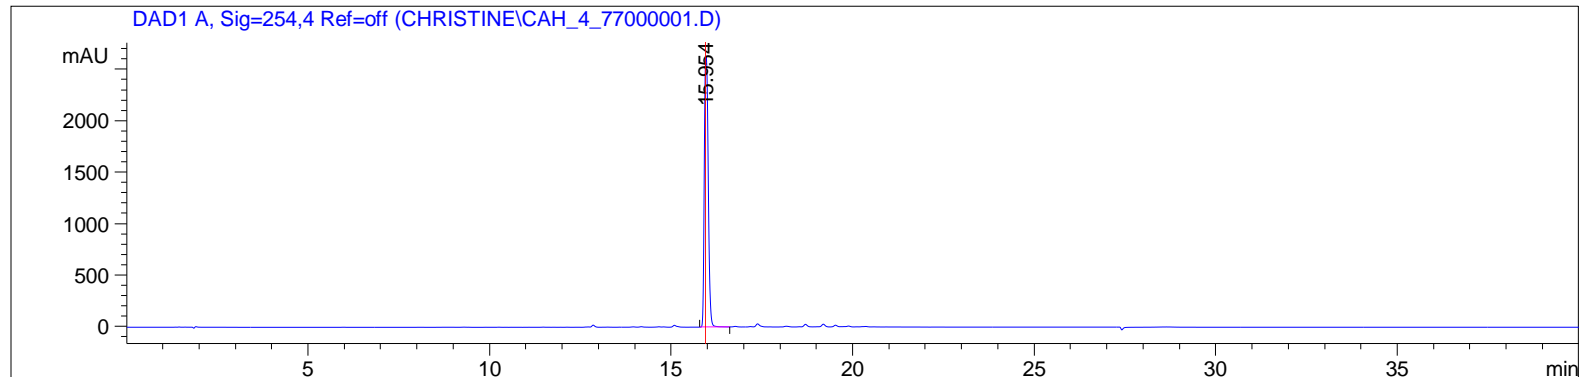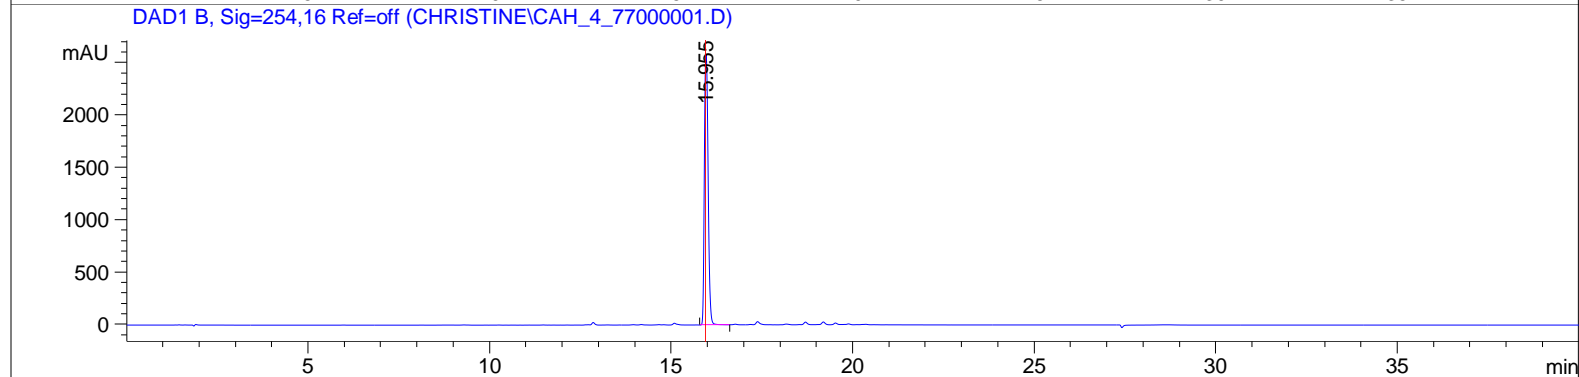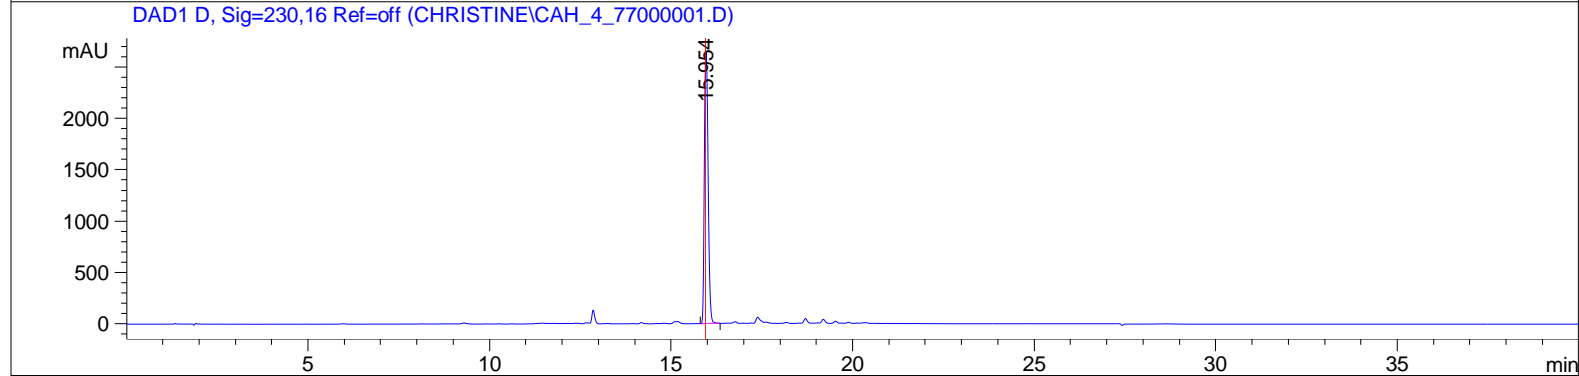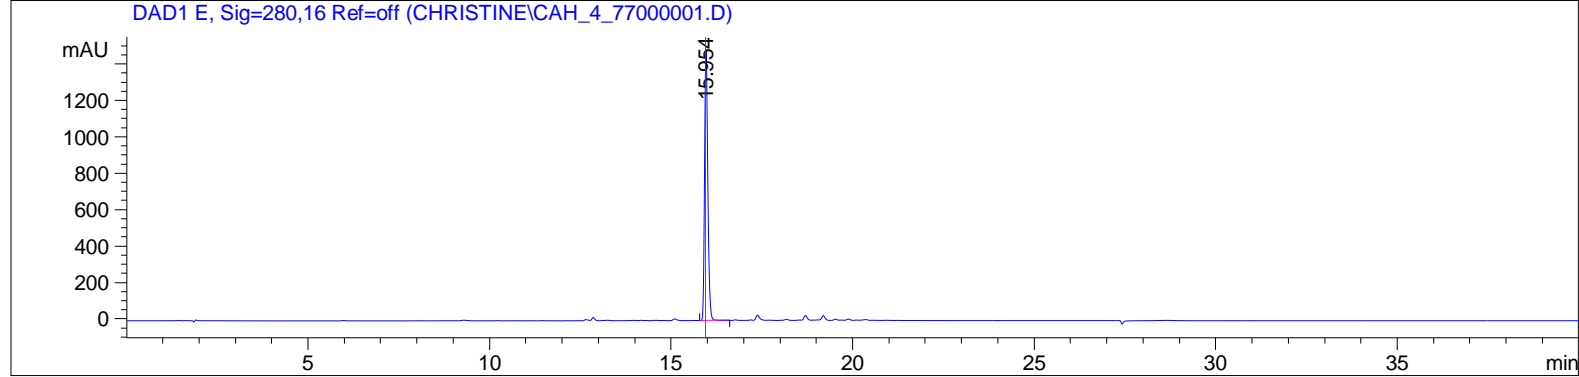

Sample Name: CAH\_4\_77

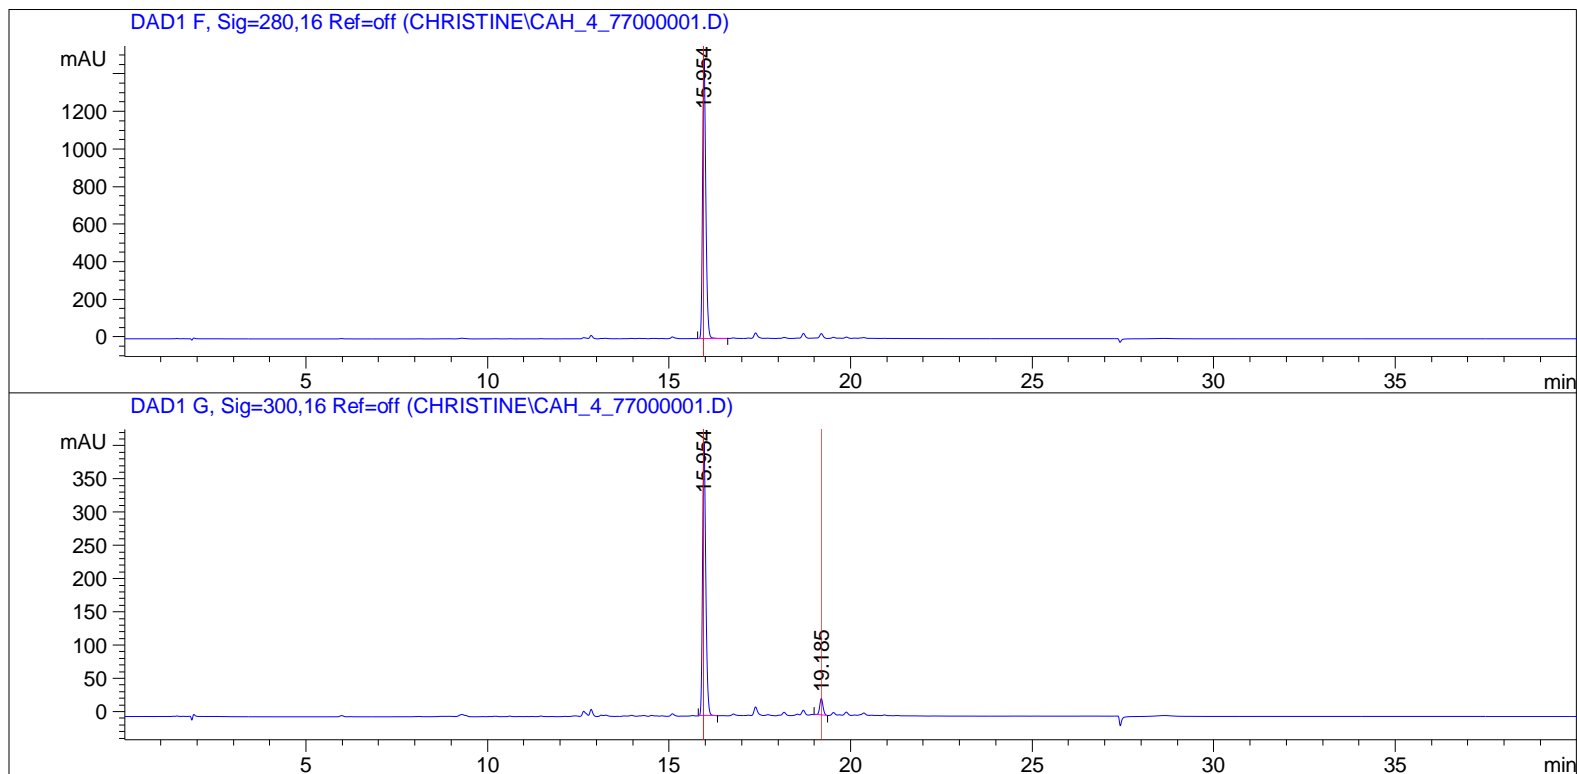

=====  
 Area Percent Report  
 =====

Sorted By : Signal  
 Multiplier : 1.0000  
 Dilution : 1.0000  
 Use Multiplier & Dilution Factor with ISTDs

Signal 1: DAD1 A, Sig=254,4 Ref=off

| Peak # | RetTime [min] | Type | Width [min] | Area [mAU*s] | Height [mAU] | Area %   |
|--------|---------------|------|-------------|--------------|--------------|----------|
| 1      | 15.954        | BV   | 0.1202      | 1.98992e4    | 2632.82886   | 100.0000 |

Totals : 1.98992e4 2632.82886

Signal 2: DAD1 B, Sig=254,16 Ref=off

| Peak # | RetTime [min] | Type | Width [min] | Area [mAU*s] | Height [mAU] | Area %   |
|--------|---------------|------|-------------|--------------|--------------|----------|
| 1      | 15.955        | BV   | 0.1145      | 1.87492e4    | 2588.72656   | 100.0000 |

Totals : 1.87492e4 2588.72656

Signal 3: DAD1 D, Sig=230,16 Ref=off

| Peak # | RetTime [min] | Type | Width [min] | Area [mAU*s] | Height [mAU] | Area %   |
|--------|---------------|------|-------------|--------------|--------------|----------|
| 1      | 15.954        | BV   | 0.1145      | 1.91852e4    | 2648.36694   | 100.0000 |

Totals : 1.91852e4 2648.36694

Signal 4: DAD1 E, Sig=280,16 Ref=off

| Peak # | RetTime [min] | Type | Width [min] | Area [mAU*s] | Height [mAU] | Area %   |
|--------|---------------|------|-------------|--------------|--------------|----------|
| 1      | 15.954        | BV   | 0.0965      | 9237.36035   | 1485.50195   | 100.0000 |

Totals : 9237.36035 1485.50195

Signal 5: DAD1 F, Sig=280,16 Ref=off

| Peak # | RetTime [min] | Type | Width [min] | Area [mAU*s] | Height [mAU] | Area %   |
|--------|---------------|------|-------------|--------------|--------------|----------|
| 1      | 15.954        | BV   | 0.0965      | 9237.36035   | 1485.50195   | 100.0000 |

Totals : 9237.36035 1485.50195

Signal 6: DAD1 G, Sig=300,16 Ref=off

| Peak # | RetTime [min] | Type | Width [min] | Area [mAU*s] | Height [mAU] | Area %  |
|--------|---------------|------|-------------|--------------|--------------|---------|
| 1      | 15.954        | BB   | 0.0942      | 2545.80176   | 411.13858    | 94.1161 |
| 2      | 19.185        | BB   | 0.0984      | 159.15662    | 24.96513     | 5.8839  |

Totals : 2704.95837 436.10371

=====  
\*\*\* End of Report \*\*\*

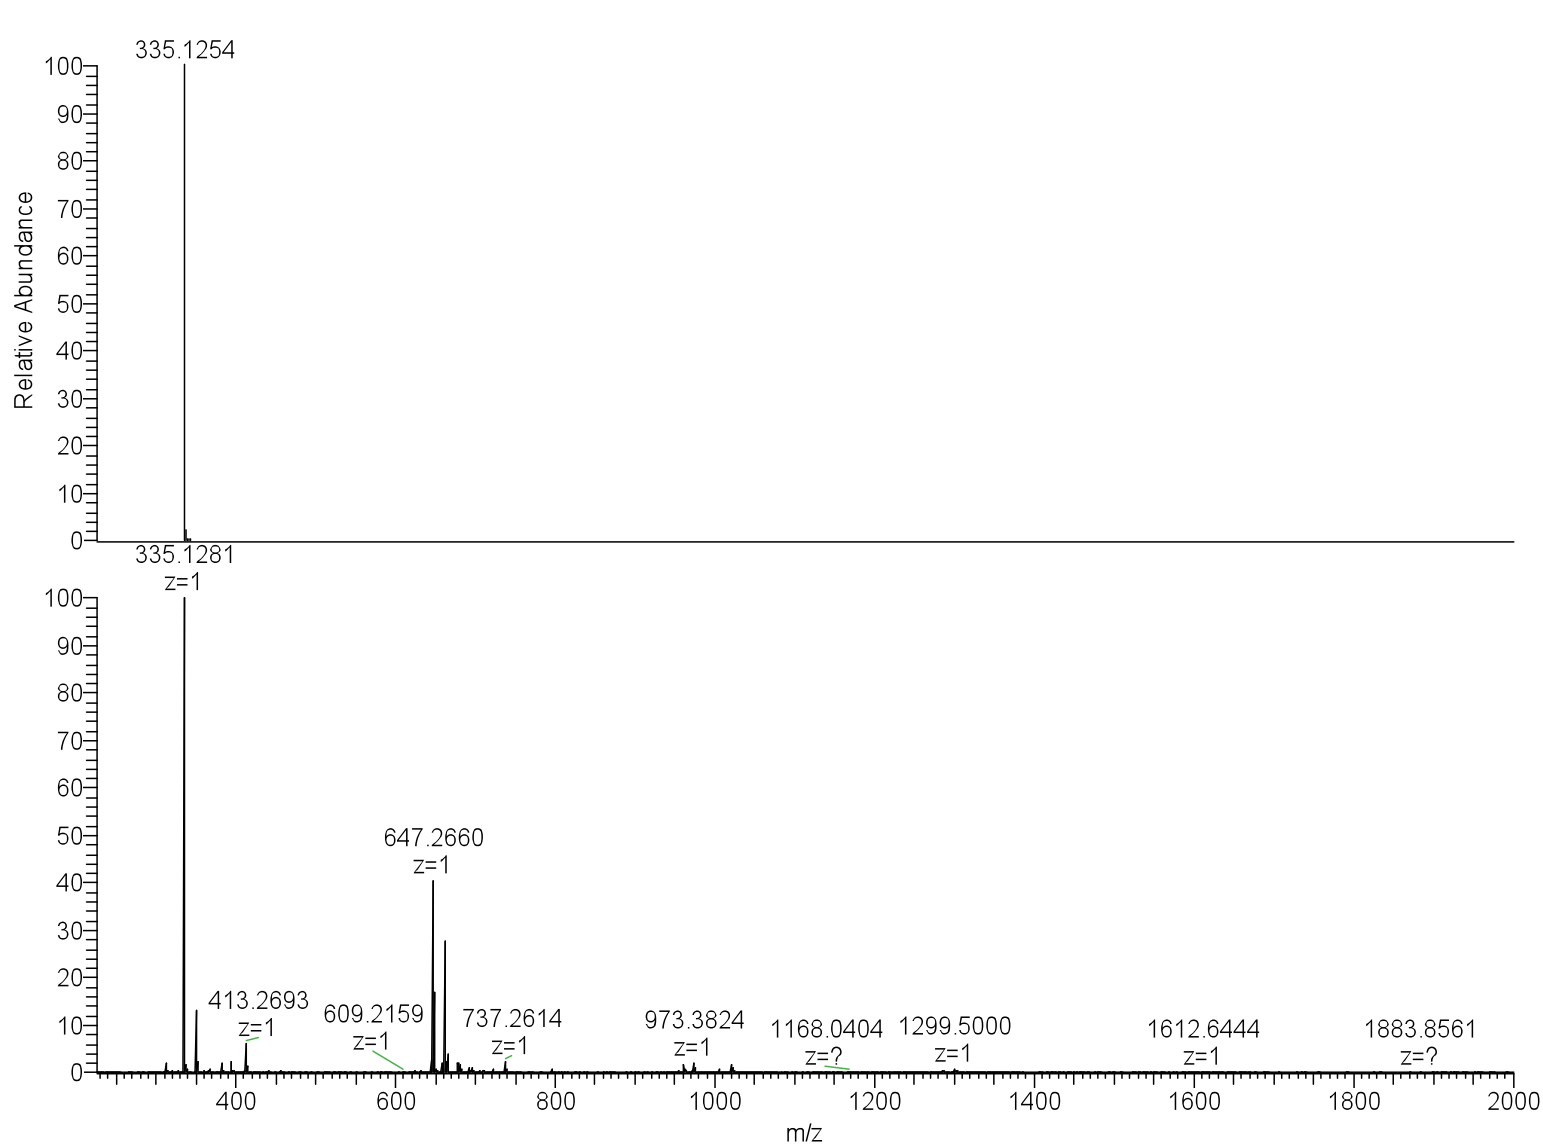

NL:  
8.05E5  
C<sub>19</sub>H<sub>20</sub>O<sub>4</sub>Na:  
C<sub>19</sub>H<sub>20</sub>O<sub>4</sub>Na<sub>1</sub>  
pa Chrg 1

NL:  
6.88E7  
cah-4-77\_Orbi\_+  
ESI#6 RT: 0.09  
AV: 1 T: FTMS + p  
ESI Full ms  
[225.00-2000.00]

**S109**

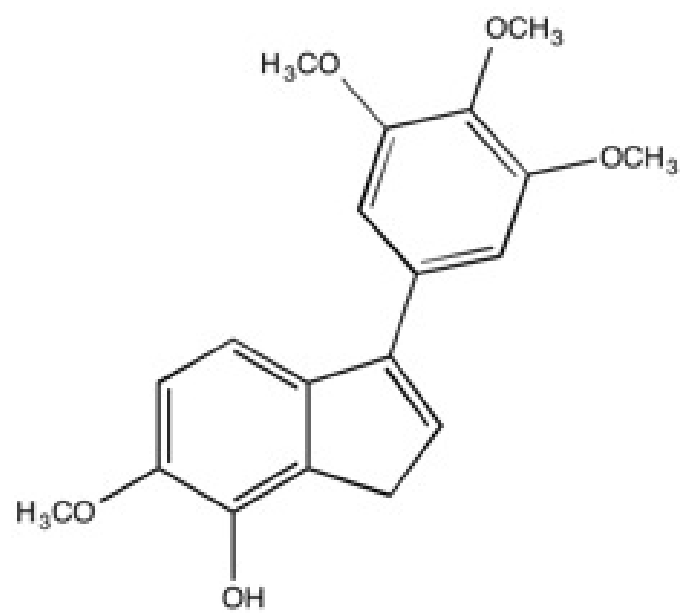

**31**

7.260  
7.088  
7.075  
6.882  
6.869  
6.801  
6.459  
6.455  
6.451

5.780

3.935  
3.905

3.487  
3.483

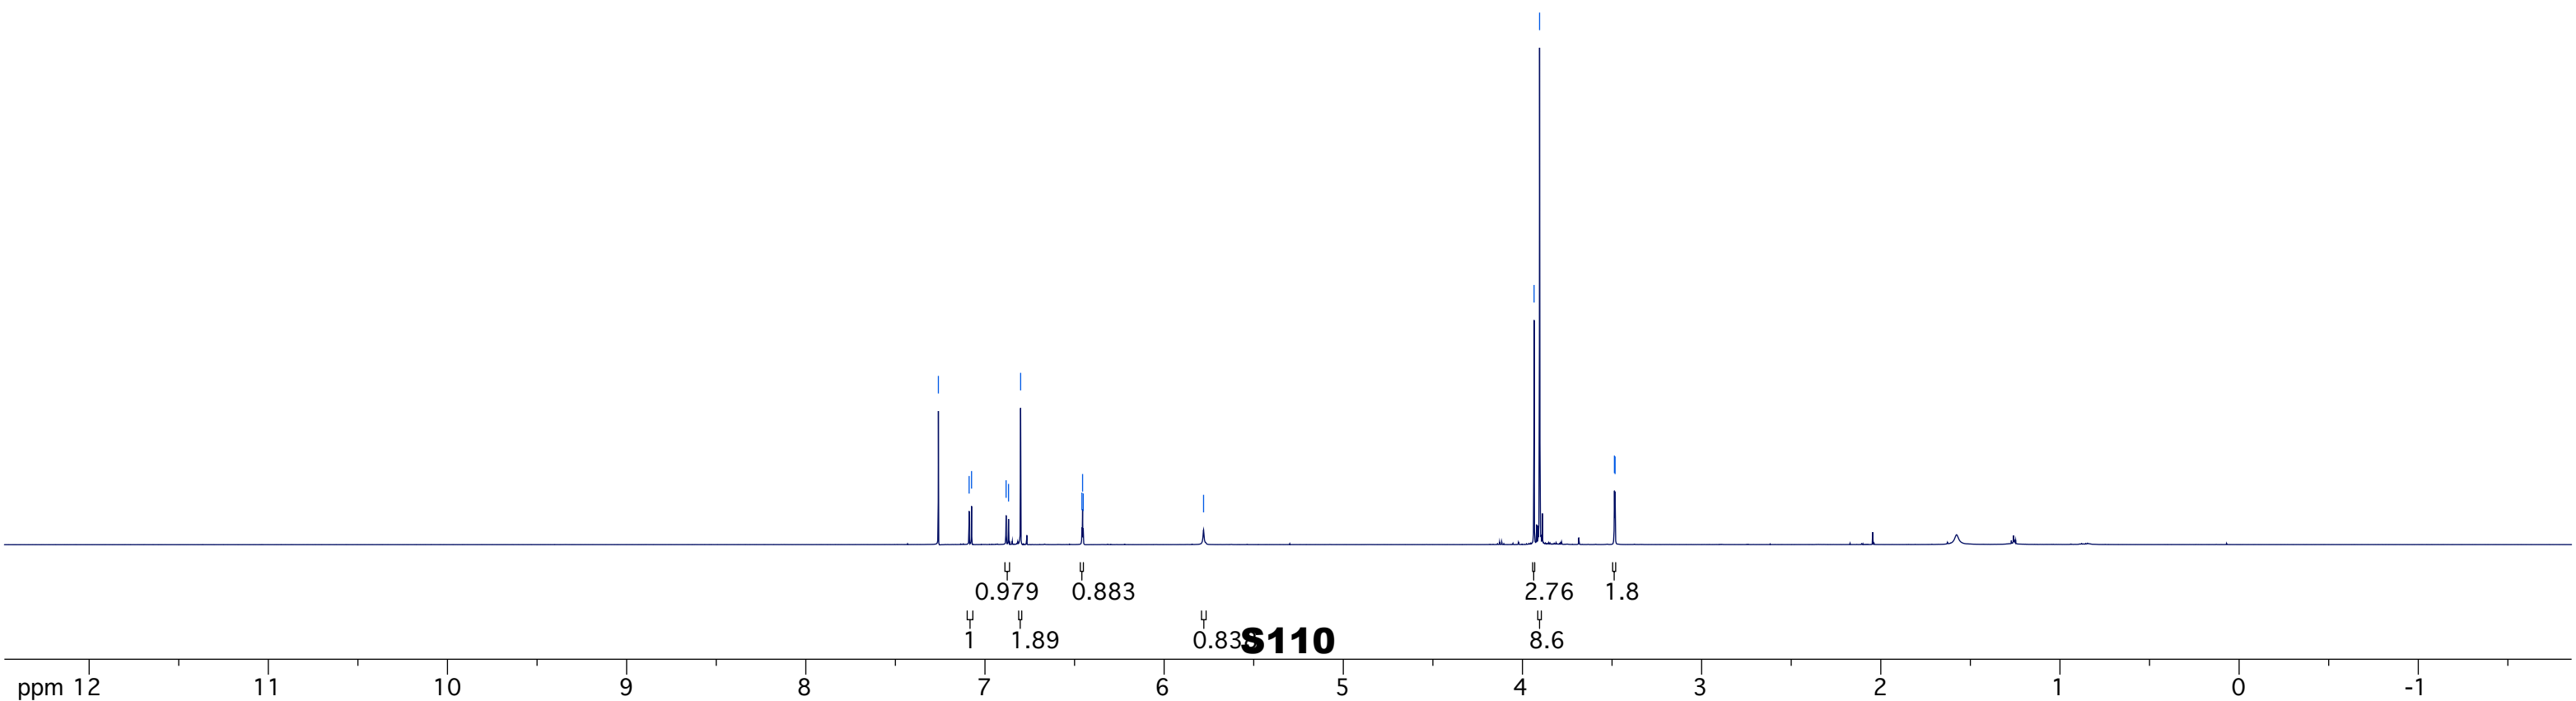

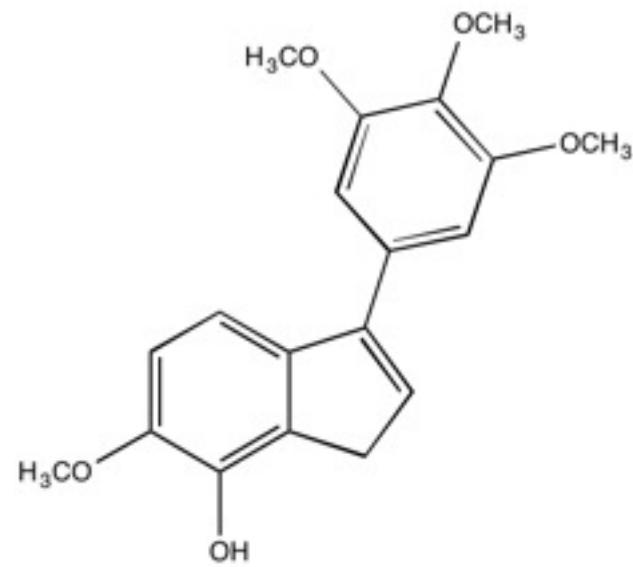

**31**

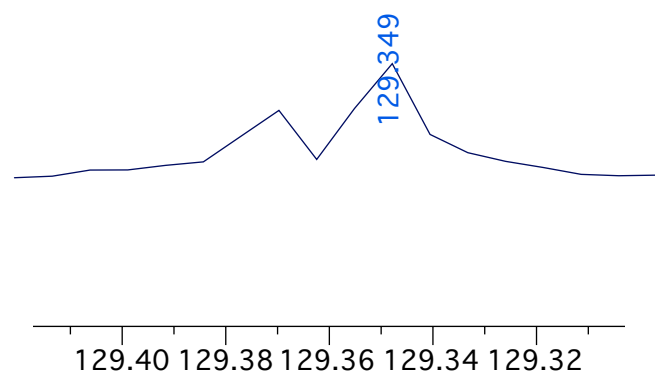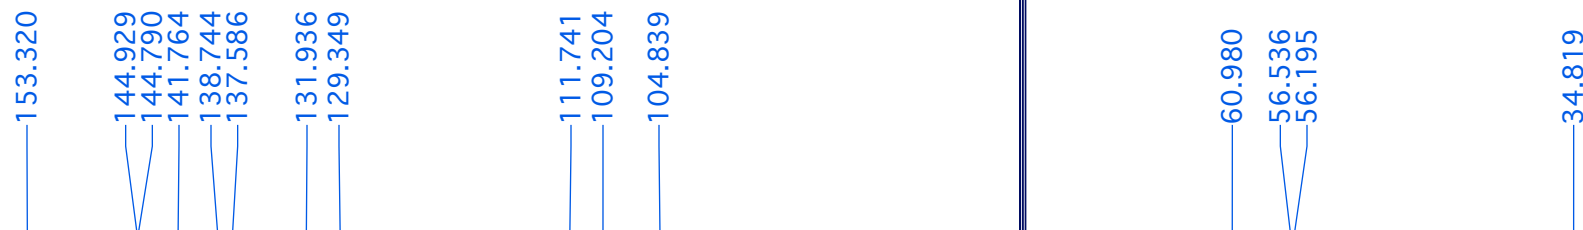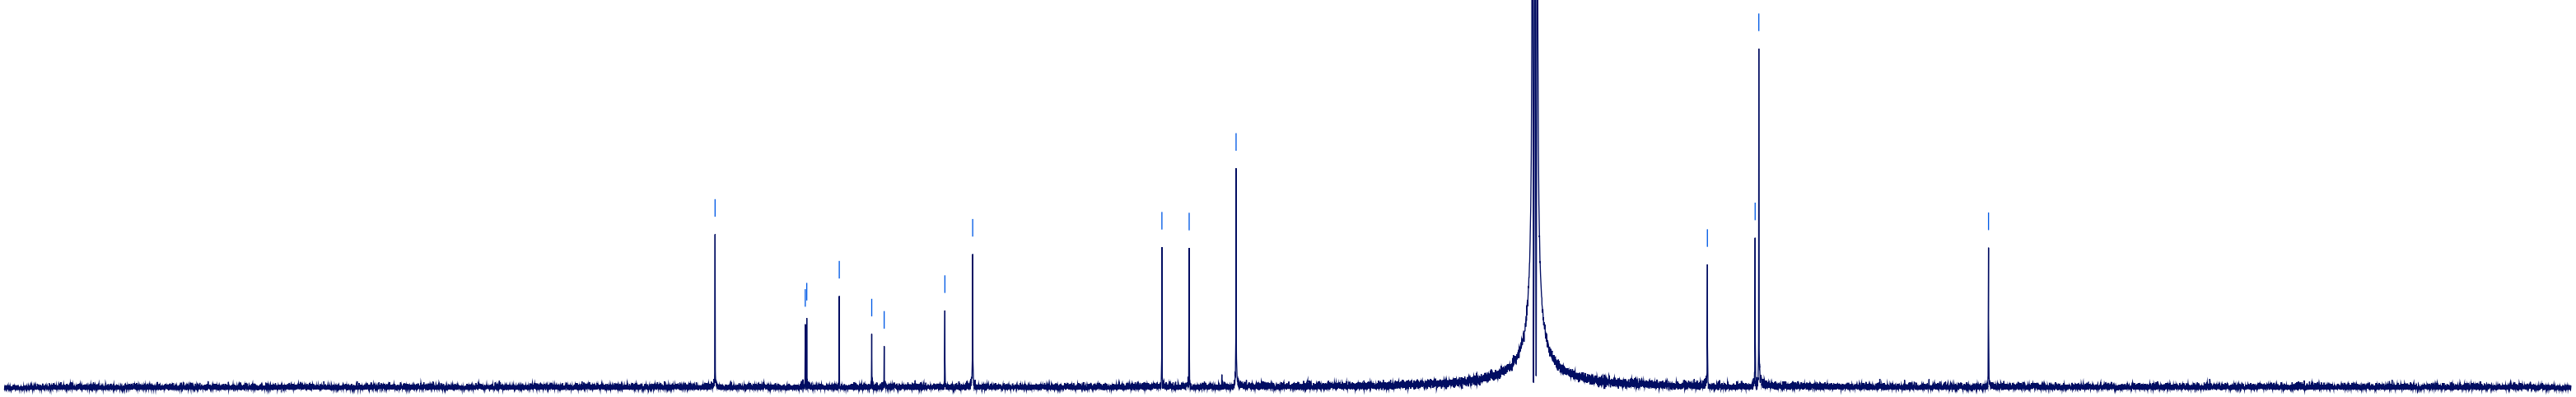

**S111**

Sample Name: JVL\_1\_103

=====  
Acq. Operator : christine  
Acq. Instrument : Instrument 1 Location : -  
Injection Date : 9/2/2015 11:49:32 AM  
Acq. Method : C:\CHEM32\1\METHODS\MASTERMETHOD.M  
Last changed : 9/2/2015 11:46:00 AM by christine  
Analysis Method : C:\CHEM32\1\DATA\CHRISTINE\JVL\_1\_10300001.D\DA.M (MASTERMETHOD.M)  
Last changed : 9/2/2015 1:22:35 PM by christine  
Sample Info :

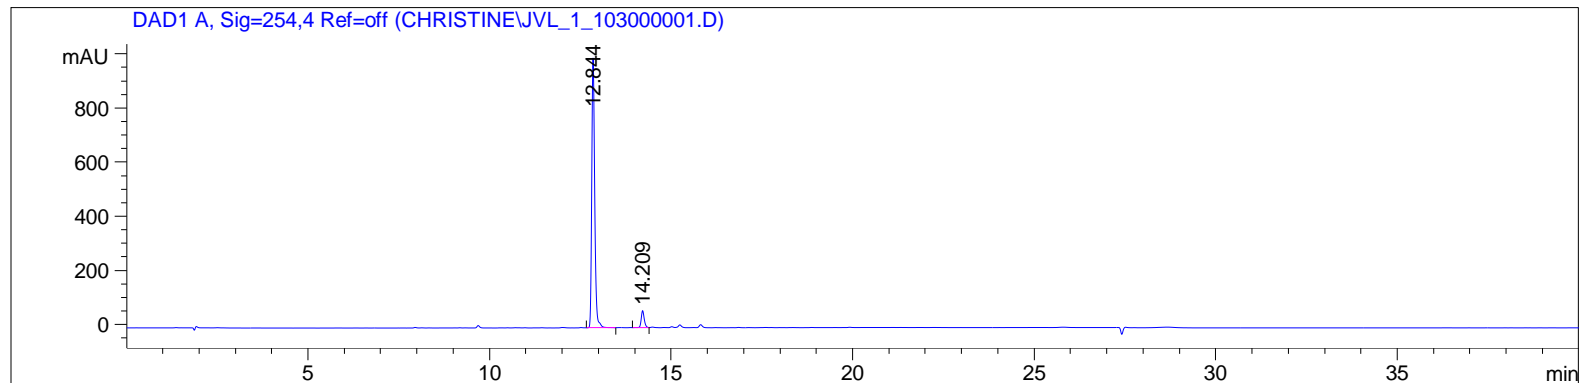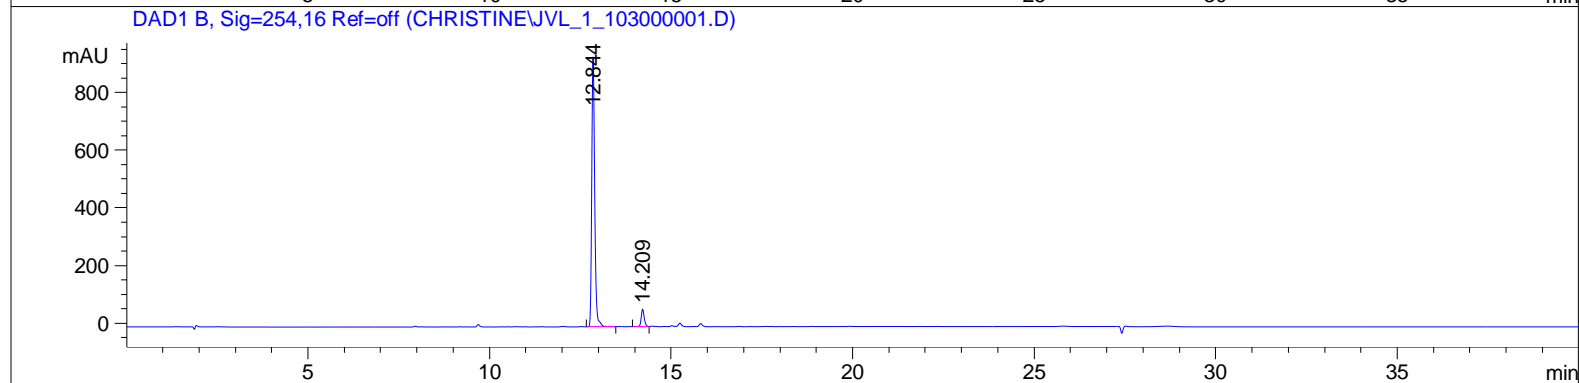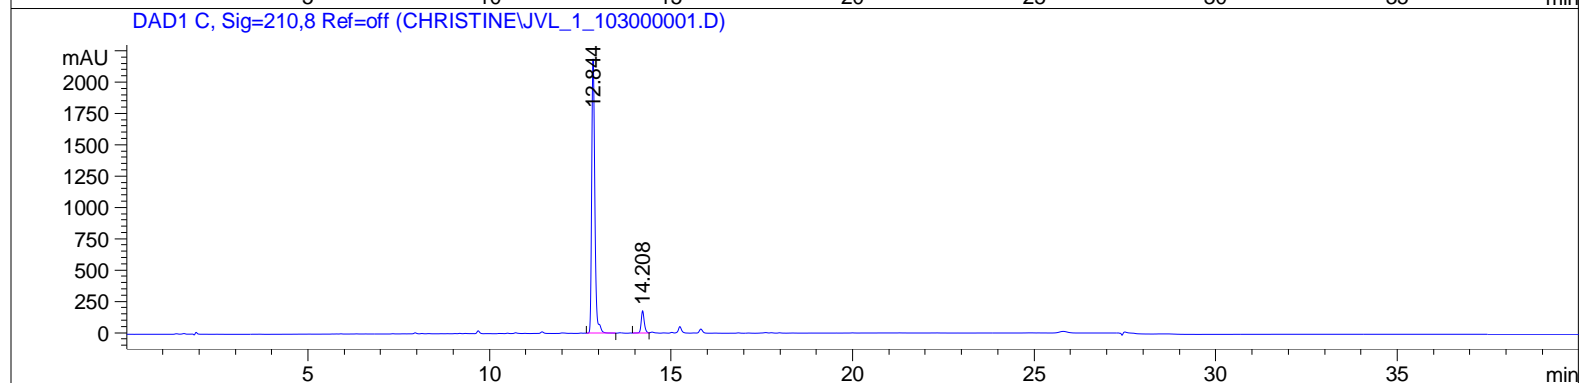



Sample Name: JVL\_1\_103

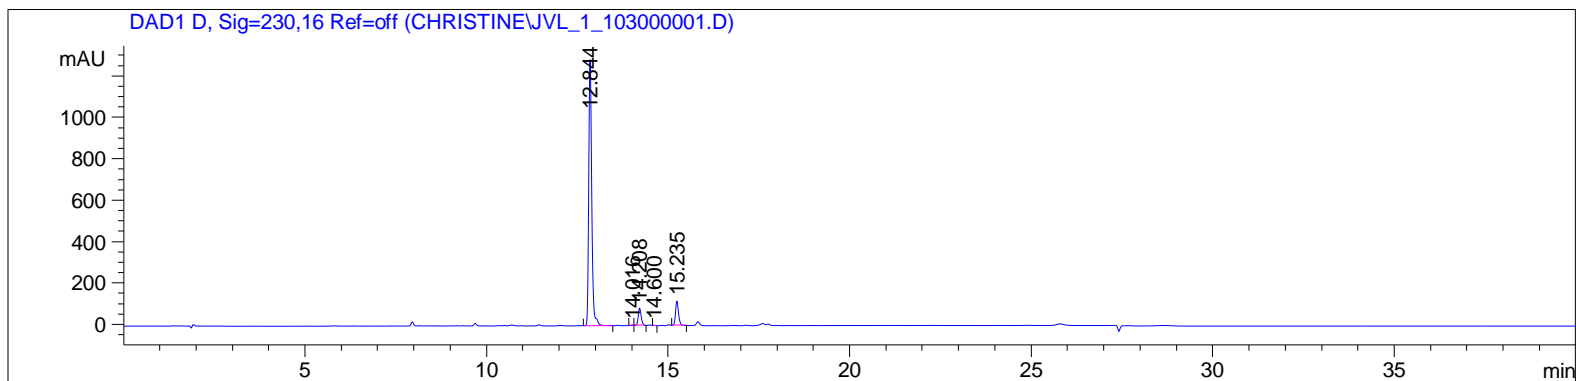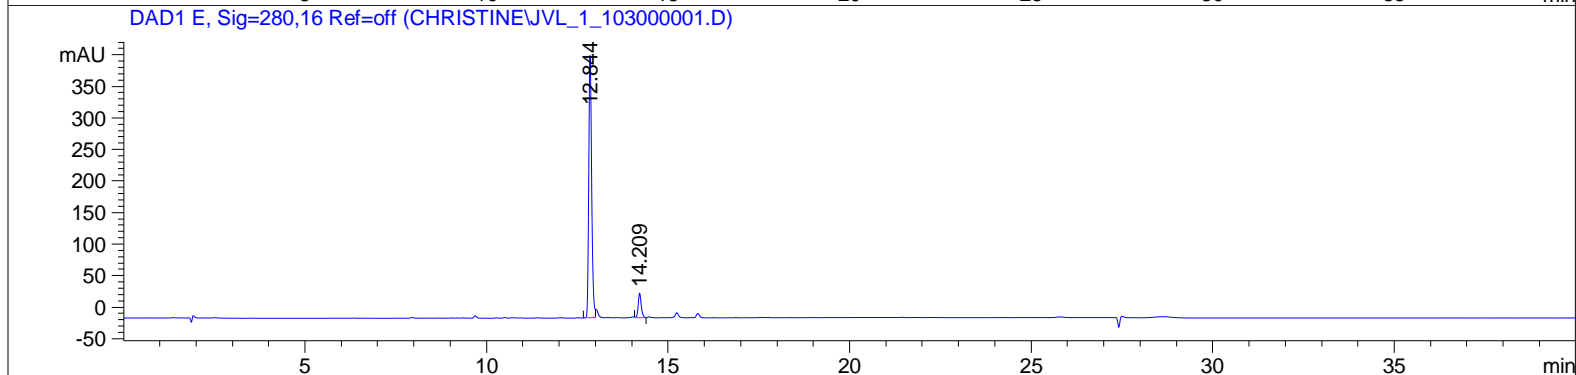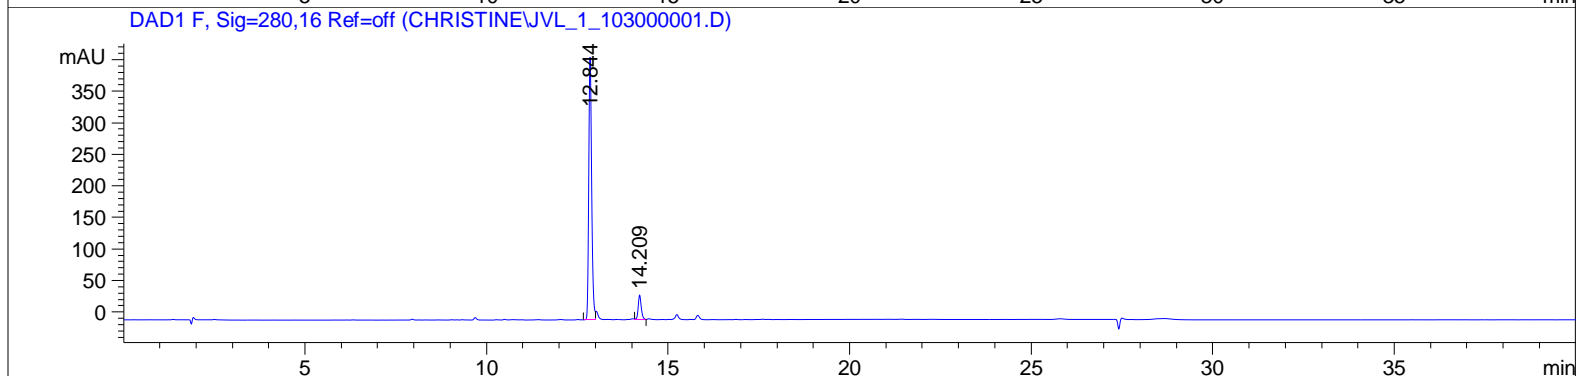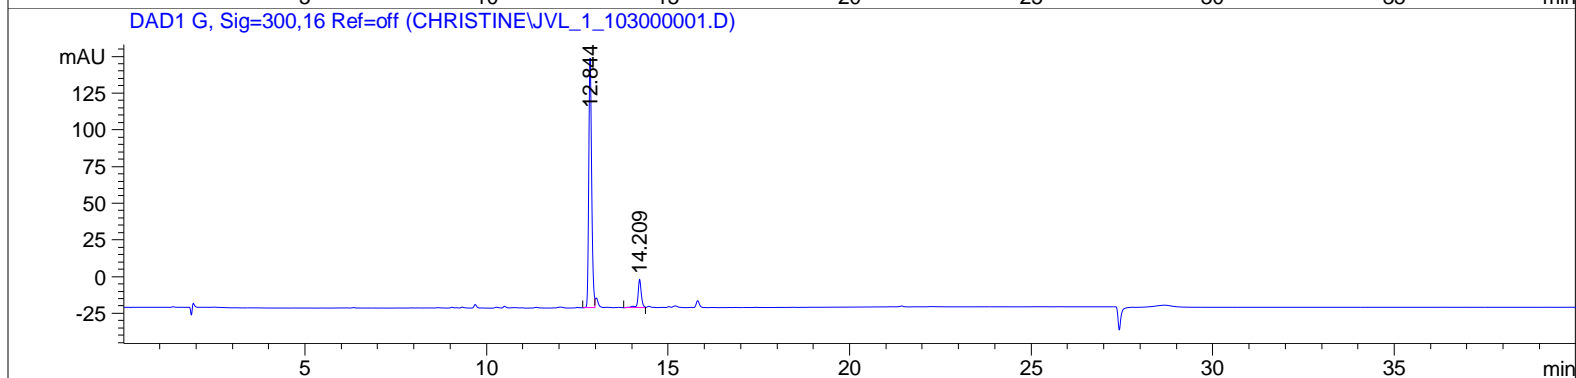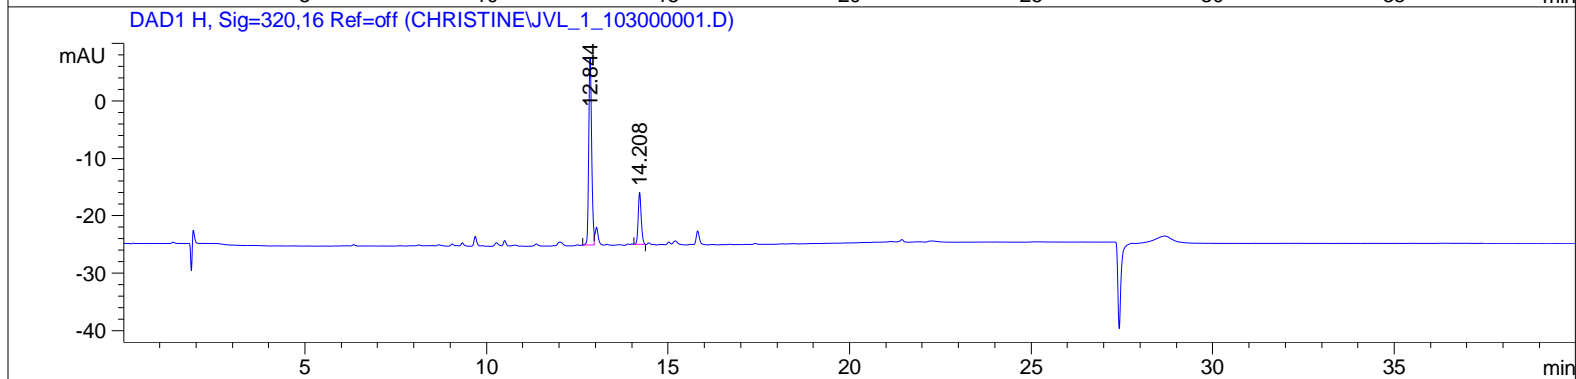

Sample Name: JVL\_1\_103

```

=====
                          Area Percent Report
=====

```

```

Sorted By           :      Signal
Multiplier          :      1.0000
Dilution           :      1.0000
Use Multiplier & Dilution Factor with ISTDs

```

Signal 1: DAD1 A, Sig=254,4 Ref=off

| Peak # | RetTime [min] | Type | Width [min] | Area [mAU*s] | Height [mAU] | Area %  |
|--------|---------------|------|-------------|--------------|--------------|---------|
| 1      | 12.844        | VB   | 0.0879      | 5636.32080   | 997.72461    | 93.8211 |
| 2      | 14.209        | VV   | 0.0889      | 371.19644    | 62.86393     | 6.1789  |

```
Totals :                      6007.51724 1060.58854
```

Signal 2: DAD1 B, Sig=254,16 Ref=off

| Peak # | RetTime [min] | Type | Width [min] | Area [mAU*s] | Height [mAU] | Area %  |
|--------|---------------|------|-------------|--------------|--------------|---------|
| 1      | 12.844        | VB   | 0.0880      | 5292.54199   | 935.98364    | 93.6462 |
| 2      | 14.209        | VV   | 0.0893      | 359.09149    | 60.48515     | 6.3538  |

```
Totals :                      5651.63348 996.46879
```

Signal 3: DAD1 C, Sig=210,8 Ref=off

| Peak # | RetTime [min] | Type | Width [min] | Area [mAU*s] | Height [mAU] | Area %  |
|--------|---------------|------|-------------|--------------|--------------|---------|
| 1      | 12.844        | VV   | 0.0925      | 1.32413e4    | 2191.42236   | 92.4869 |
| 2      | 14.208        | VV   | 0.0904      | 1075.65198   | 178.37202    | 7.5131  |

```
Totals :                      1.43170e4 2369.79439
```

Signal 4: DAD1 D, Sig=230,16 Ref=off

| Peak # | RetTime [min] | Type | Width [min] | Area [mAU*s] | Height [mAU] | Area %  |
|--------|---------------|------|-------------|--------------|--------------|---------|
| 1      | 12.844        | VV   | 0.0891      | 7398.26025   | 1285.71204   | 86.1586 |
| 2      | 14.016        | VV   | 0.0917      | 9.59935      | 1.60752      | 0.1118  |

Sample Name: JVL\_1\_103

| Peak # | RetTime [min] | Type | Width [min] | Area [mAU*s] | Height [mAU] | Area % |
|--------|---------------|------|-------------|--------------|--------------|--------|
| 3      | 14.208        | VB   | 0.0880      | 488.34366    | 83.83261     | 5.6871 |
| 4      | 14.600        | VB   | 0.0731      | 5.42998      | 1.14918      | 0.0632 |
| 5      | 15.235        | VB   | 0.0880      | 685.15985    | 117.48914    | 7.9792 |

Totals : 8586.79310 1489.79048

Signal 5: DAD1 E, Sig=280,16 Ref=off

| Peak # | RetTime [min] | Type | Width [min] | Area [mAU*s] | Height [mAU] | Area %  |
|--------|---------------|------|-------------|--------------|--------------|---------|
| 1      | 12.844        | BV   | 0.0868      | 2311.47363   | 416.20947    | 90.9454 |
| 2      | 14.209        | VV   | 0.0889      | 230.13258    | 38.96600     | 9.0546  |

Totals : 2541.60622 455.17548

Signal 6: DAD1 F, Sig=280,16 Ref=off

| Peak # | RetTime [min] | Type | Width [min] | Area [mAU*s] | Height [mAU] | Area %  |
|--------|---------------|------|-------------|--------------|--------------|---------|
| 1      | 12.844        | BV   | 0.0868      | 2311.47461   | 416.20947    | 90.9454 |
| 2      | 14.209        | VV   | 0.0889      | 230.13316    | 38.96600     | 9.0546  |

Totals : 2541.60777 455.17548

Signal 7: DAD1 G, Sig=300,16 Ref=off

| Peak # | RetTime [min] | Type | Width [min] | Area [mAU*s] | Height [mAU] | Area %  |
|--------|---------------|------|-------------|--------------|--------------|---------|
| 1      | 12.844        | BV   | 0.0868      | 944.62726    | 170.05644    | 88.5016 |
| 2      | 14.209        | BV   | 0.0946      | 122.72880    | 19.20041     | 11.4984 |

Totals : 1067.35606 189.25686

Signal 8: DAD1 H, Sig=320,16 Ref=off

Sample Name: JVL\_1\_103

| Peak # | RetTime [min] | Type | Width [min] | Area [mAU*s] | Height [mAU] | Area %  |
|--------|---------------|------|-------------|--------------|--------------|---------|
| 1      | 12.844        | BV   | 0.0875      | 183.99568    | 32.77533     | 77.8242 |
| 2      | 14.208        | BB   | 0.0874      | 52.42920     | 9.07247      | 22.1758 |

Totals :                                   236.42488   41.84780

=====  
\*\*\* End of Report \*\*\*

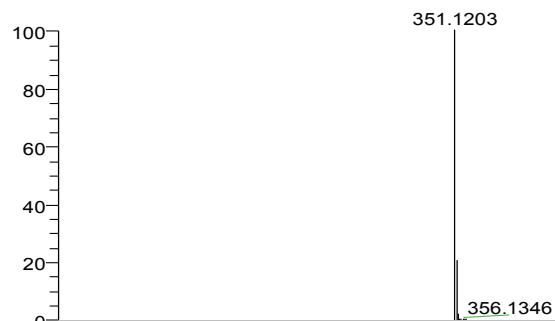

NL:  
8.03E5  
C<sub>19</sub>H<sub>20</sub>O<sub>5</sub>Na:  
C<sub>19</sub>H<sub>20</sub>O<sub>5</sub>Na<sub>1</sub>  
pa Chrg 1

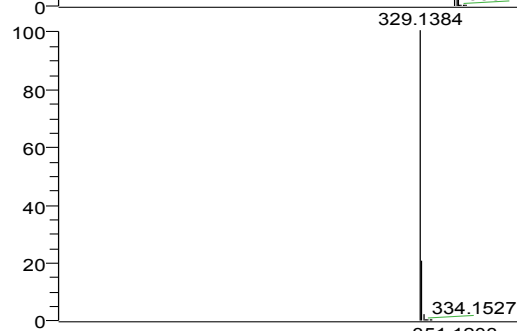

NL:  
8.03E5  
C<sub>19</sub>H<sub>21</sub>O<sub>5</sub>:  
C<sub>19</sub>H<sub>21</sub>O<sub>5</sub>  
pa Chrg 1

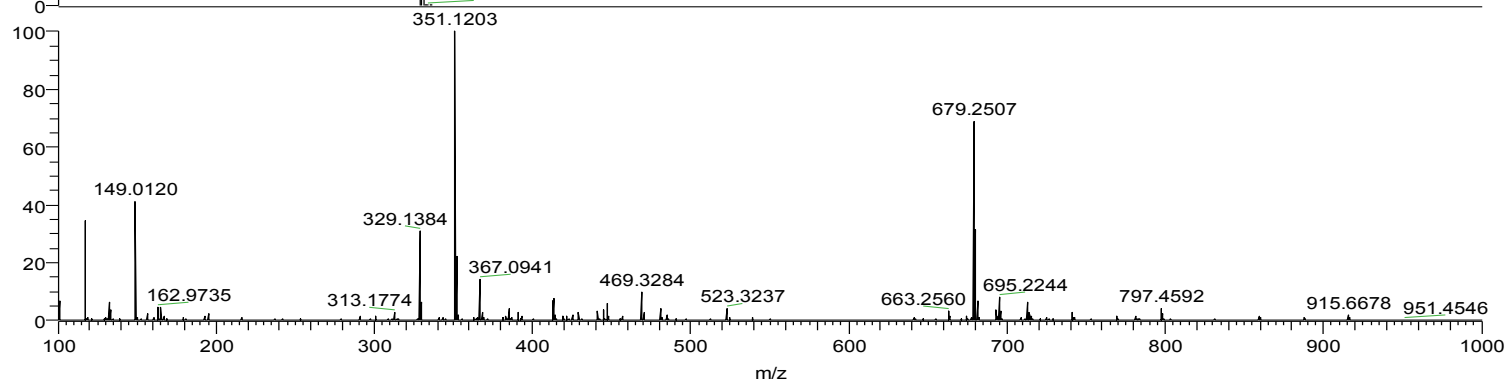

NL:  
1.55E7  
JVL\_1\_103\_ESI+  
Obri#1 RT: 0.00  
AV: 1 T: FTMS + p  
ESI Full ms  
[100.00-1000.00]

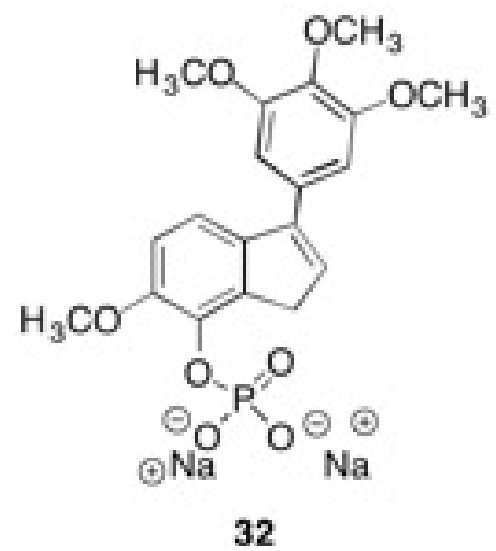

6.992  
6.978  
6.817  
6.804  
6.669  
6.395  
6.392  
6.389

3.794  
3.678  
3.648  
3.580

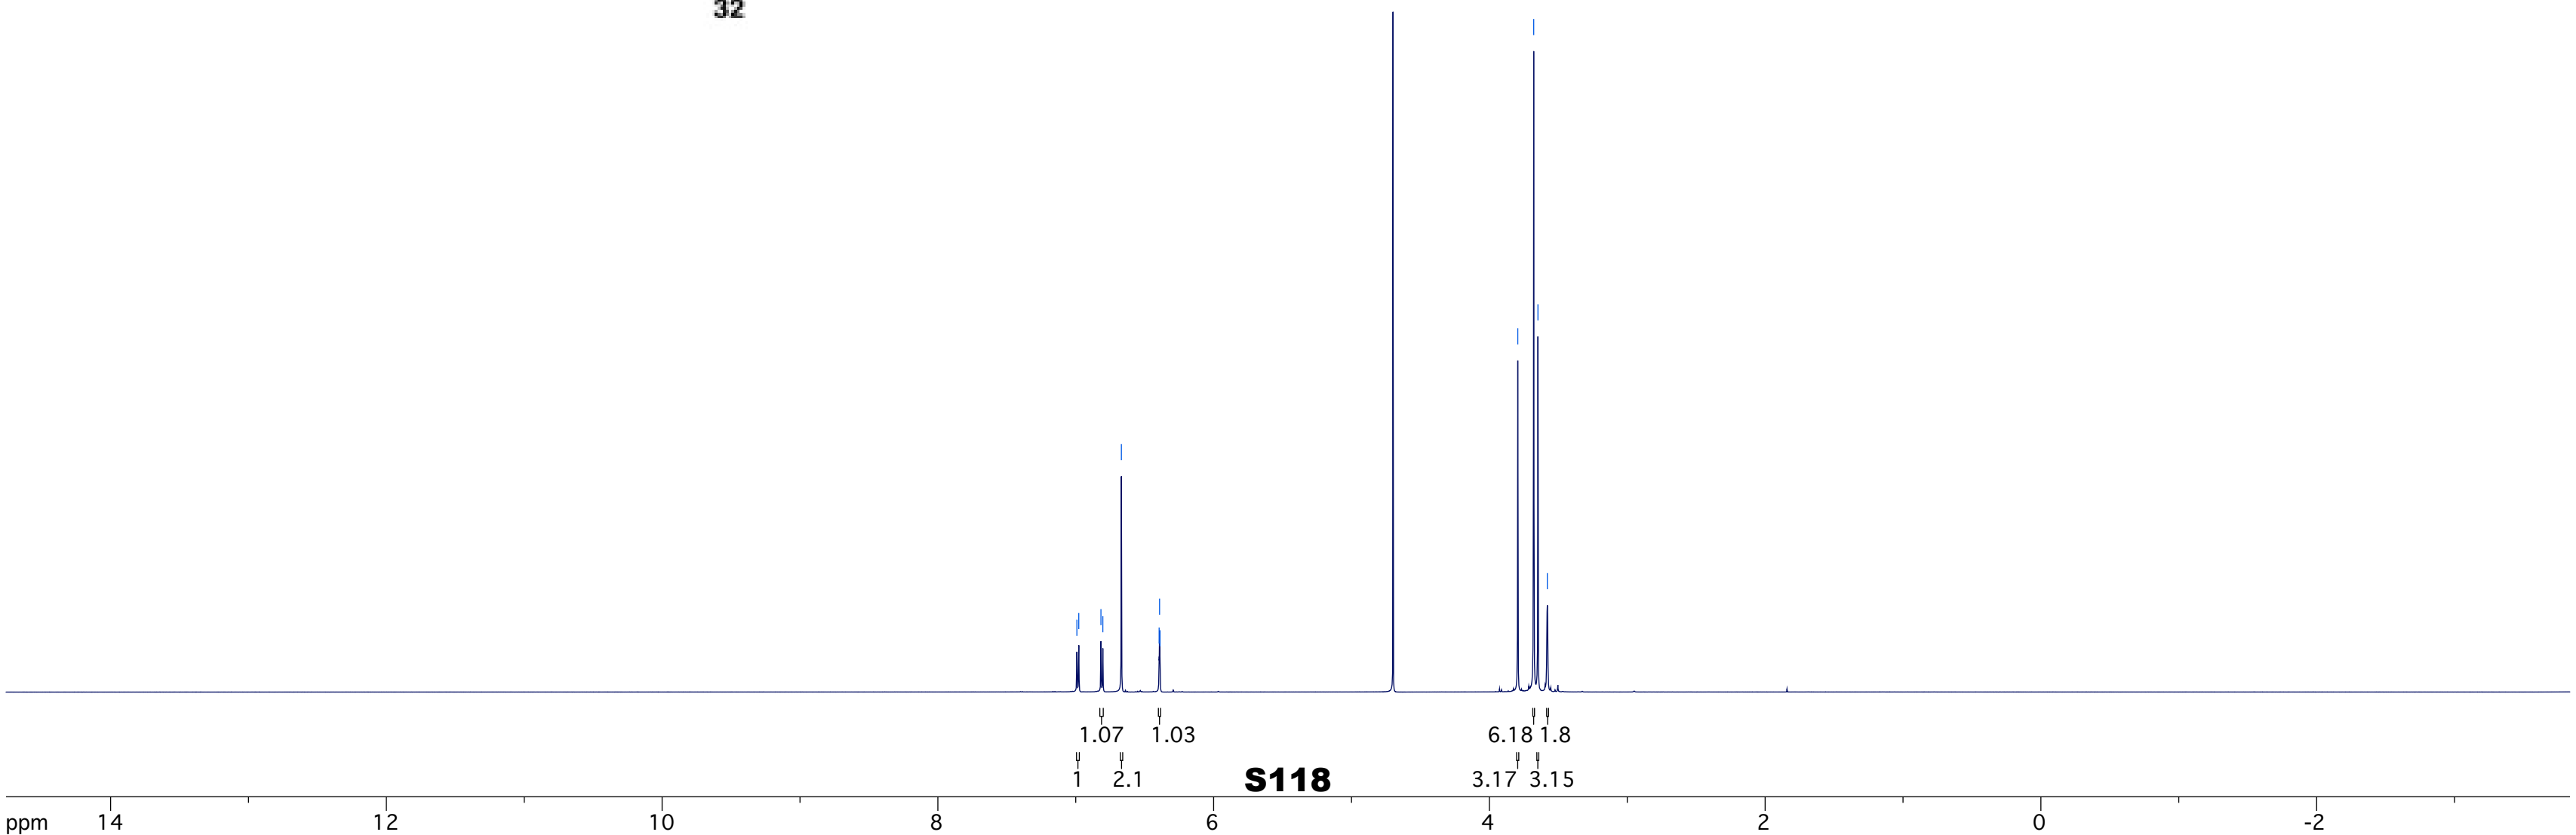

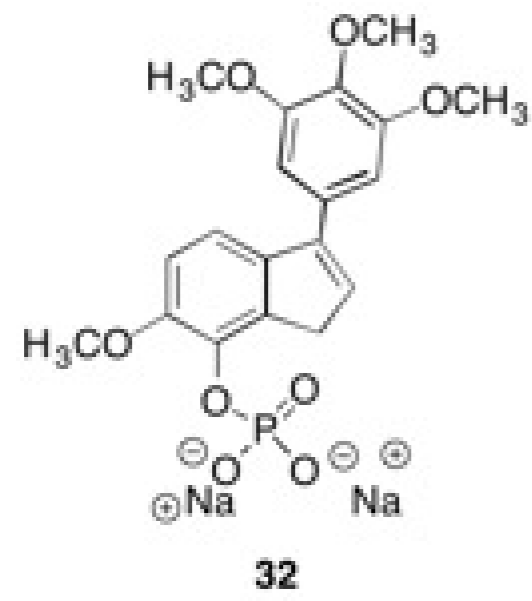

152.363  
150.005  
149.981  
142.818  
139.574  
139.523  
138.202  
138.182  
137.449  
136.034  
132.398  
130.791  
115.033  
111.187  
104.835  
60.866  
56.282  
55.882  
36.314

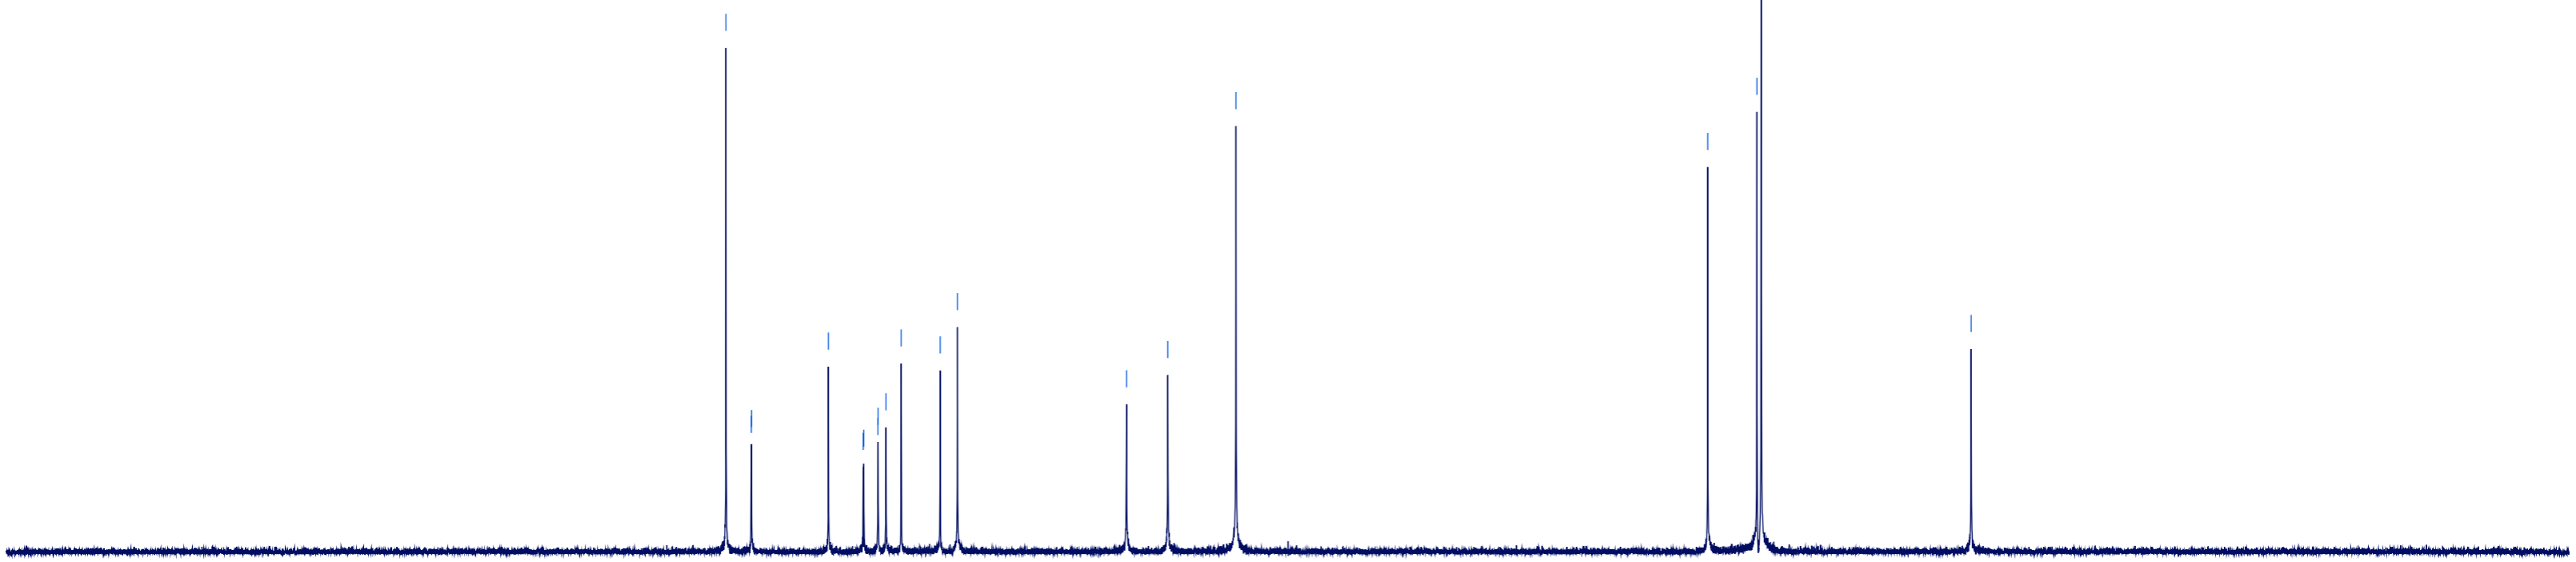

**S119**

ppm 200 180 160 140 120 100 80 60 40 20 0

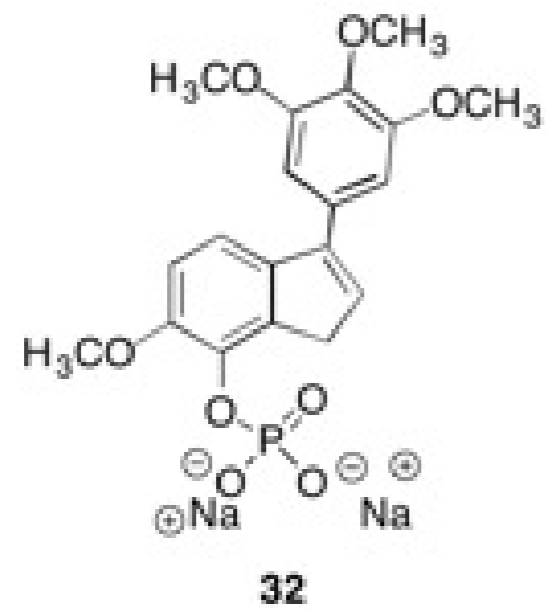

0.600

ppm

100

50

-0

**S120**

-50

-100

-150

-200



Sample Name: CAH-6-24

```

=====
Acq. Operator   : Christine
Acq. Instrument : Instrument 1                Location :   -
Injection Date  : 4/26/2016 12:43:48 PM
Acq. Method     : C:\CHEM32\1\METHODS\MASTERMETHOD.M
Last changed    : 4/26/2016 12:31:15 PM by Christine
Analysis Method : C:\CHEM32\1\DATA\CHRISTINE\CAH-6-2400001.D\DA.M (MASTERMETHOD.M)
Last changed    : 4/26/2016 1:57:20 PM by Christine
  
```

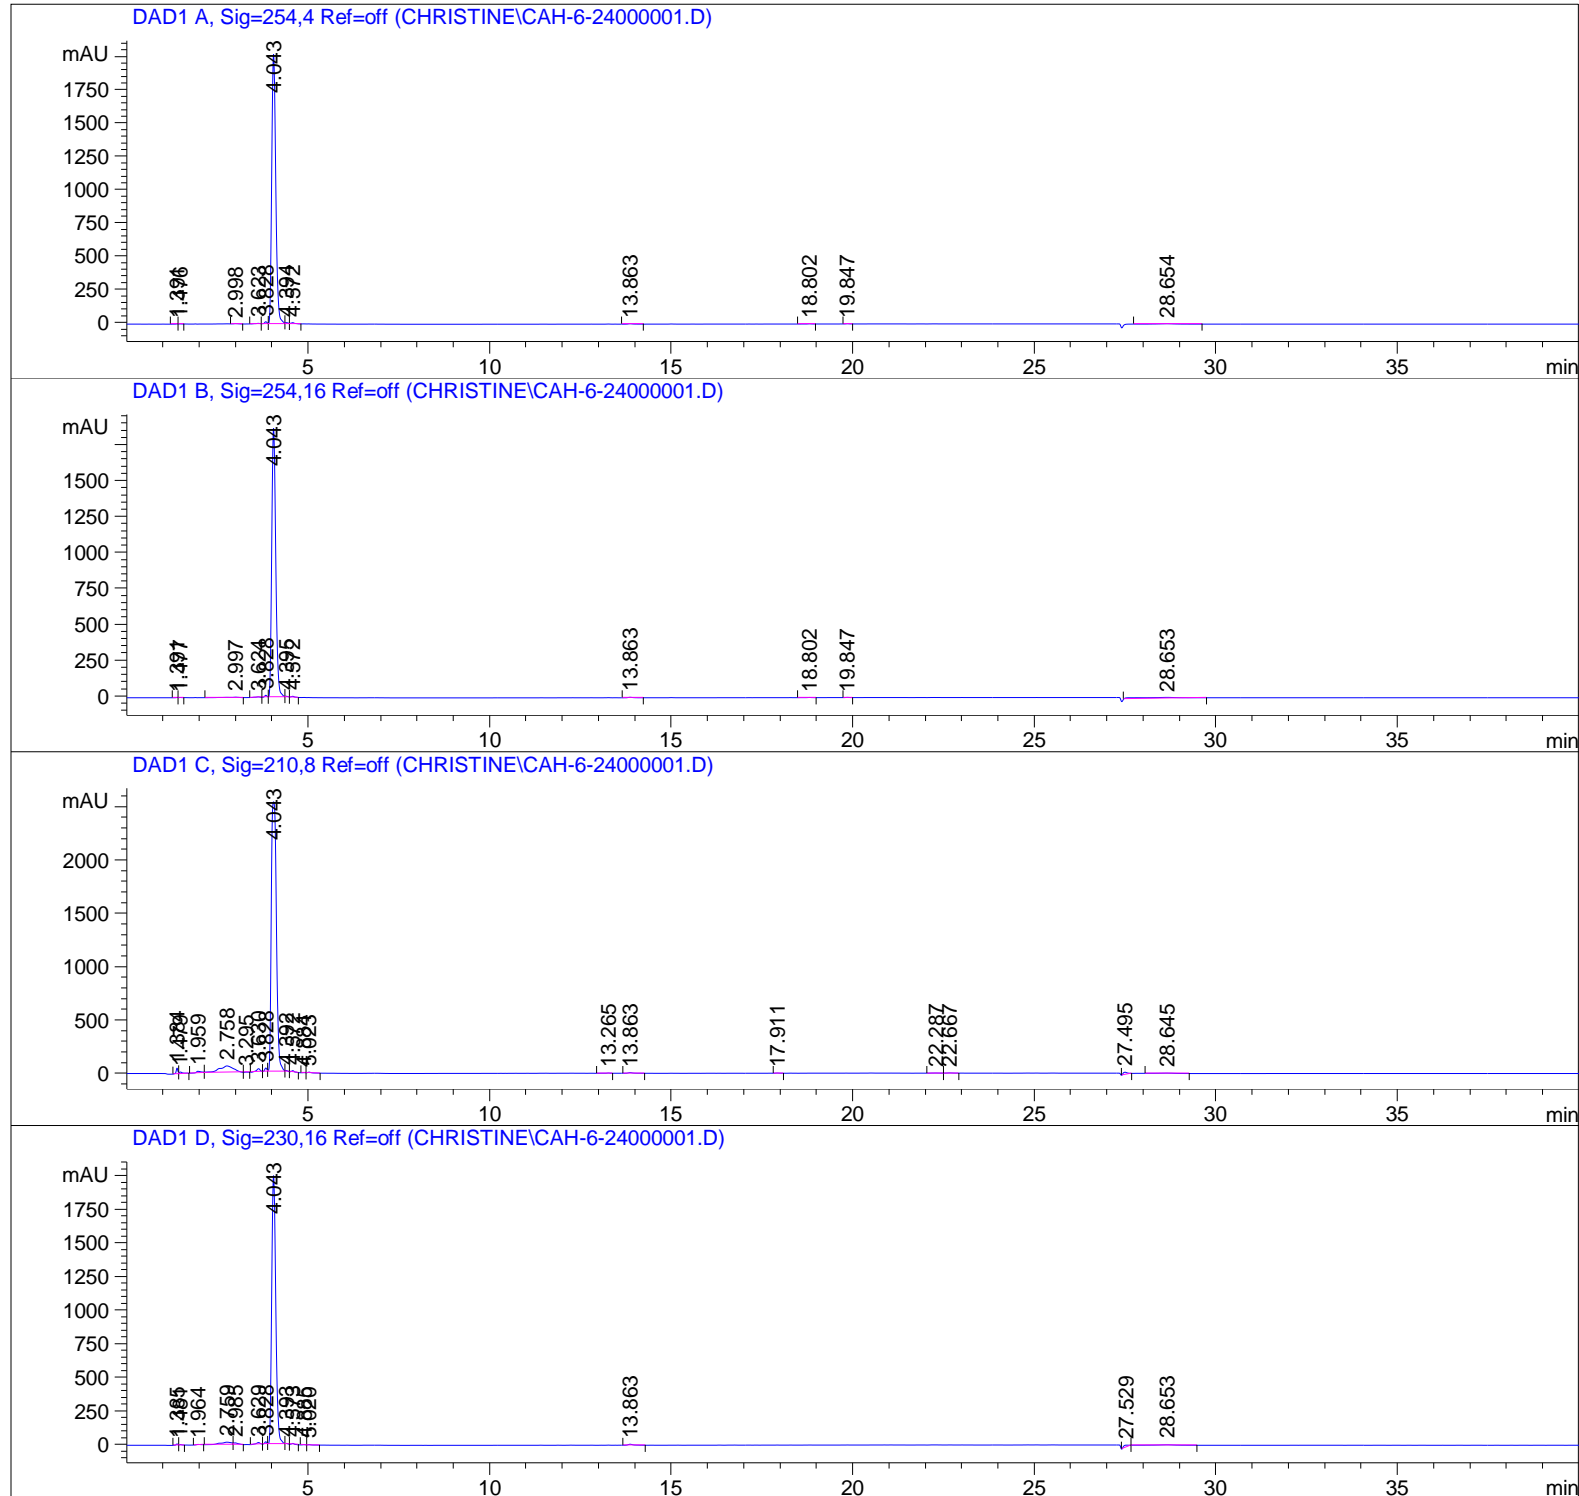

Sample Name: CAH-6-24

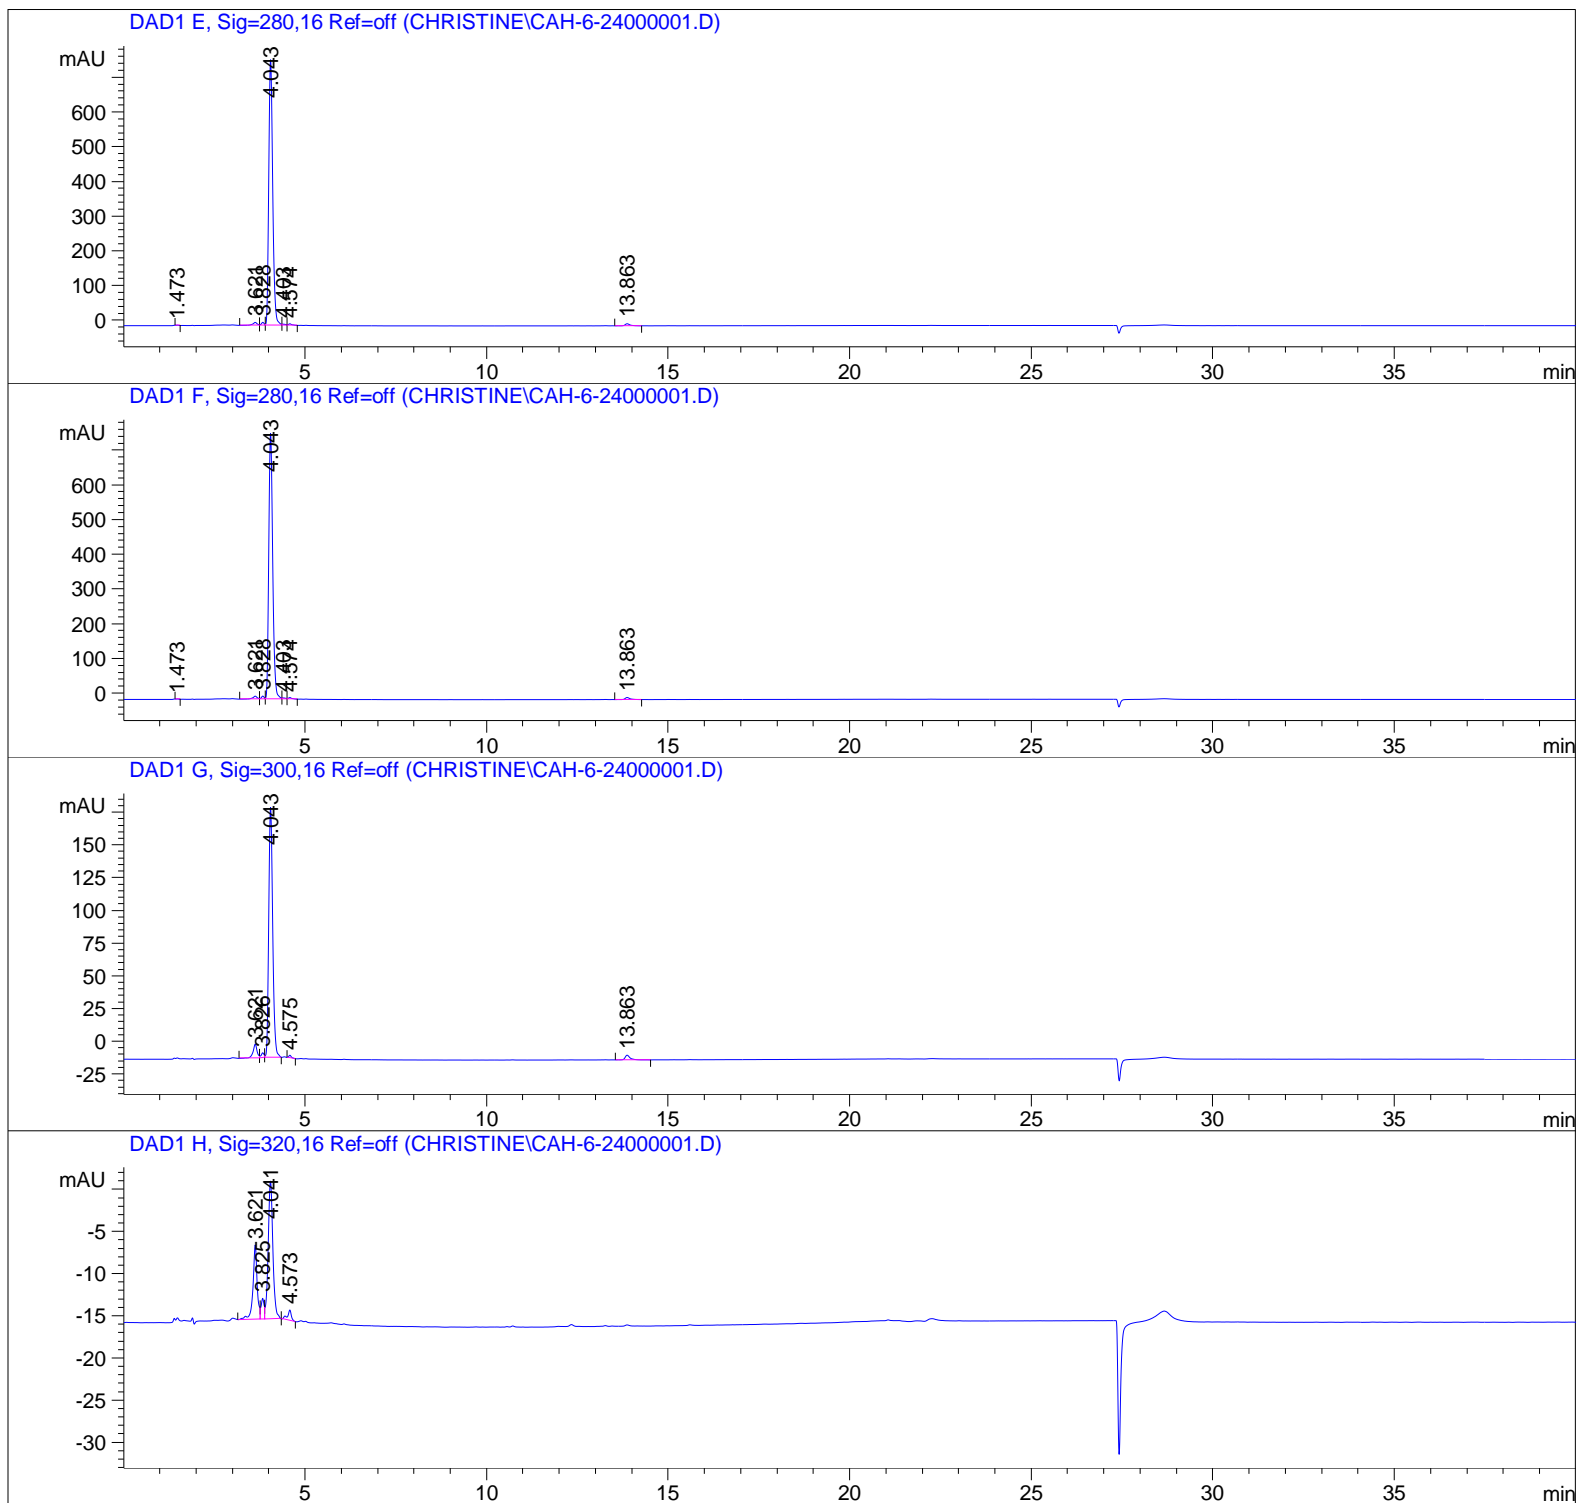

=====  
 Area Percent Report  
 =====

Sorted By : Signal  
 Multiplier : 1.0000  
 Dilution : 1.0000  
 Use Multiplier & Dilution Factor with ISTDs

Sample Name: CAH-6-24

Signal 1: DAD1 A, Sig=254,4 Ref=off

| Peak # | RetTime [min] | Type | Width [min] | Area [mAU*s] | Height [mAU] | Area %  |
|--------|---------------|------|-------------|--------------|--------------|---------|
| 1      | 1.391         | BV   | 0.0610      | 7.81049      | 1.85999      | 0.0488  |
| 2      | 1.476         | VV   | 0.0836      | 10.12844     | 1.74734      | 0.0633  |
| 3      | 2.998         | BB   | 0.1245      | 17.02232     | 1.97571      | 0.1064  |
| 4      | 3.623         | BB   | 0.1181      | 25.76275     | 3.19316      | 0.1611  |
| 5      | 3.828         | BV   | 0.0699      | 68.47198     | 14.82507     | 0.4281  |
| 6      | 4.043         | VV   | 0.1199      | 1.56188e4    | 2025.83167   | 97.6627 |
| 7      | 4.394         | VV   | 0.0885      | 55.33225     | 8.90629      | 0.3460  |
| 8      | 4.572         | VB   | 0.1021      | 62.22238     | 8.63247      | 0.3891  |
| 9      | 13.863        | BB   | 0.1367      | 25.87182     | 2.77756      | 0.1618  |
| 10     | 18.802        | BB   | 0.1071      | 9.02090      | 1.29729      | 0.0564  |
| 11     | 19.847        | BB   | 0.0948      | 8.76622      | 1.44499      | 0.0548  |
| 12     | 28.654        | BB   | 0.4623      | 83.38203     | 2.58484      | 0.5214  |

Totals : 1.59925e4 2075.07638

Signal 2: DAD1 B, Sig=254,16 Ref=off

| Peak # | RetTime [min] | Type | Width [min] | Area [mAU*s] | Height [mAU] | Area %  |
|--------|---------------|------|-------------|--------------|--------------|---------|
| 1      | 1.391         | BV   | 0.0591      | 7.21573      | 1.78816      | 0.0476  |
| 2      | 1.477         | VV   | 0.0799      | 9.09765      | 1.66187      | 0.0601  |
| 3      | 2.997         | BB   | 0.2996      | 70.14854     | 2.96901      | 0.4631  |
| 4      | 3.624         | BB   | 0.1172      | 27.39253     | 3.42800      | 0.1808  |
| 5      | 3.828         | BV   | 0.0679      | 59.99481     | 13.48118     | 0.3960  |
| 6      | 4.043         | VV   | 0.1190      | 1.42912e4    | 1872.98071   | 94.3370 |
| 7      | 4.395         | VB   | 0.0709      | 22.35714     | 4.74763      | 0.1476  |
| 8      | 4.572         | BB   | 0.0769      | 27.41272     | 5.42608      | 0.1810  |
| 9      | 13.863        | BB   | 0.1386      | 30.36974     | 3.26277      | 0.2005  |
| 10     | 18.802        | BB   | 0.1084      | 8.06718      | 1.14245      | 0.0533  |
| 11     | 19.847        | BB   | 0.0949      | 8.07938      | 1.32921      | 0.0533  |
| 12     | 28.653        | BB   | 1.2066      | 587.76019    | 6.16329      | 3.8798  |

Totals : 1.51491e4 1918.38036

Signal 3: DAD1 C, Sig=210,8 Ref=off

| Peak # | RetTime [min] | Type | Width [min] | Area [mAU*s] | Height [mAU] | Area % |
|--------|---------------|------|-------------|--------------|--------------|--------|
| 1      | 1.384         | BV   | 0.0515      | 181.29756    | 53.53682     | 0.6562 |
| 2      | 1.479         | VB   | 0.0908      | 101.26290    | 15.37472     | 0.3665 |
| 3      | 1.959         | BV   | 0.1503      | 171.36317    | 16.61413     | 0.6203 |

Sample Name: CAH-6-24

| Peak # | RetTime [min] | Type | Width [min] | Area [mAU*s] | Height [mAU] | Area %  |
|--------|---------------|------|-------------|--------------|--------------|---------|
| 4      | 2.758         | VB   | 0.3937      | 1774.10779   | 62.39947     | 6.4215  |
| 5      | 3.295         | BB   | 0.0764      | 12.51878     | 2.33929      | 0.0453  |
| 6      | 3.630         | BB   | 0.1072      | 200.15843    | 28.07985     | 0.7245  |
| 7      | 3.828         | BV   | 0.0671      | 138.52396    | 31.64297     | 0.5014  |
| 8      | 4.043         | VV   | 0.1570      | 2.44912e4    | 2527.73950   | 88.6480 |
| 9      | 4.392         | VB   | 0.0686      | 47.80655     | 10.59979     | 0.1730  |
| 10     | 4.572         | BB   | 0.0760      | 63.74675     | 12.82641     | 0.2307  |
| 11     | 4.884         | BV   | 0.0744      | 8.96094      | 1.85477      | 0.0324  |
| 12     | 5.023         | VB   | 0.0880      | 45.50289     | 7.58052      | 0.1647  |
| 13     | 13.265        | BB   | 0.1017      | 15.46335     | 2.20867      | 0.0560  |
| 14     | 13.863        | BB   | 0.1410      | 53.45221     | 5.61953      | 0.1935  |
| 15     | 17.911        | BB   | 0.0924      | 8.66976      | 1.47981      | 0.0314  |
| 16     | 22.287        | BV   | 0.2091      | 18.72872     | 1.19320      | 0.0678  |
| 17     | 22.667        | VV   | 0.1811      | 23.63048     | 1.95335      | 0.0855  |
| 18     | 27.495        | BB   | 0.1340      | 202.18147    | 23.12298     | 0.7318  |
| 19     | 28.645        | BB   | 0.4029      | 68.88494     | 2.55251      | 0.2493  |

Totals : 2.76275e4 2808.71828

Signal 4: DAD1 D, Sig=230,16 Ref=off

| Peak # | RetTime [min] | Type | Width [min] | Area [mAU*s] | Height [mAU] | Area %  |
|--------|---------------|------|-------------|--------------|--------------|---------|
| 1      | 1.385         | BV   | 0.0537      | 35.52041     | 9.92666      | 0.2130  |
| 2      | 1.481         | VB   | 0.0696      | 20.23402     | 4.24269      | 0.1213  |
| 3      | 1.964         | BB   | 0.1094      | 26.49018     | 3.53564      | 0.1588  |
| 4      | 2.759         | BV   | 0.3117      | 411.25793    | 18.47796     | 2.4656  |
| 5      | 2.985         | VB   | 0.1213      | 112.17307    | 12.91943     | 0.6725  |
| 6      | 3.629         | BB   | 0.1126      | 93.04063     | 12.53667     | 0.5578  |
| 7      | 3.828         | BV   | 0.0669      | 73.80240     | 16.90789     | 0.4425  |
| 8      | 4.043         | VV   | 0.1205      | 1.54928e4    | 1996.45898   | 92.8845 |
| 9      | 4.393         | VB   | 0.0699      | 25.51955     | 5.52837      | 0.1530  |
| 10     | 4.573         | BB   | 0.0735      | 34.24681     | 7.19496      | 0.2053  |
| 11     | 4.885         | BV   | 0.0784      | 10.15930     | 2.02997      | 0.0609  |
| 12     | 5.020         | VB   | 0.0851      | 14.67683     | 2.55004      | 0.0880  |
| 13     | 13.863        | BB   | 0.1415      | 70.21961     | 7.34801      | 0.4210  |
| 14     | 27.529        | BB   | 0.1549      | 158.54309    | 15.29897     | 0.9505  |
| 15     | 28.653        | BB   | 0.4906      | 100.96045    | 2.97006      | 0.6053  |

Totals : 1.66797e4 2117.92632

Signal 5: DAD1 E, Sig=280,16 Ref=off

| Peak # | RetTime [min] | Type | Width [min] | Area [mAU*s] | Height [mAU] | Area %  |
|--------|---------------|------|-------------|--------------|--------------|---------|
| 1      | 1.473         | VB   | 0.0704      | 5.48779      | 1.13574      | 0.0911  |
| 2      | 3.621         | BV   | 0.1263      | 76.58023     | 8.56689      | 1.2716  |
| 3      | 3.828         | VV   | 0.0811      | 48.96879     | 8.78171      | 0.8131  |
| 4      | 4.043         | VV   | 0.1181      | 5779.64941   | 765.73773    | 95.9686 |
| 5      | 4.403         | VV   | 0.1005      | 24.02273     | 3.48107      | 0.3989  |
| 6      | 4.574         | VB   | 0.1010      | 32.78029     | 4.60598      | 0.5443  |
| 7      | 13.863        | BB   | 0.1385      | 54.94780     | 5.91066      | 0.9124  |

Totals : 6022.43705 798.21977

Signal 6: DAD1 F, Sig=280,16 Ref=off

| Peak # | RetTime [min] | Type | Width [min] | Area [mAU*s] | Height [mAU] | Area %  |
|--------|---------------|------|-------------|--------------|--------------|---------|
| 1      | 1.473         | VB   | 0.0704      | 5.48760      | 1.13574      | 0.0911  |
| 2      | 3.621         | BV   | 0.1263      | 76.57832     | 8.56689      | 1.2716  |
| 3      | 3.828         | VV   | 0.0811      | 48.96640     | 8.78171      | 0.8131  |
| 4      | 4.043         | VV   | 0.1181      | 5779.65039   | 765.73773    | 95.9687 |
| 5      | 4.403         | VV   | 0.1005      | 24.02216     | 3.48060      | 0.3989  |
| 6      | 4.574         | VB   | 0.1010      | 32.77953     | 4.60598      | 0.5443  |
| 7      | 13.863        | BB   | 0.1385      | 54.94532     | 5.91063      | 0.9123  |

Totals : 6022.42972 798.21928

Signal 7: DAD1 G, Sig=300,16 Ref=off

| Peak # | RetTime [min] | Type | Width [min] | Area [mAU*s] | Height [mAU] | Area %  |
|--------|---------------|------|-------------|--------------|--------------|---------|
| 1      | 3.621         | BV   | 0.1131      | 83.12932     | 10.64792     | 5.1879  |
| 2      | 3.826         | VV   | 0.0800      | 20.97679     | 3.82476      | 1.3091  |
| 3      | 4.043         | VB   | 0.1186      | 1452.70459   | 191.39255    | 90.6600 |
| 4      | 4.575         | VB   | 0.0810      | 11.73287     | 2.17350      | 0.7322  |
| 5      | 13.863        | BB   | 0.1406      | 33.82201     | 3.56693      | 2.1108  |

Totals : 1602.36558 211.60565



453.0686

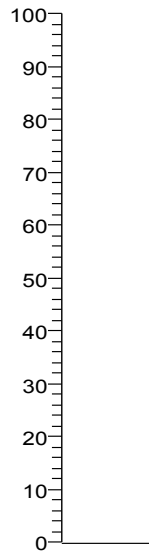

460.0871

453.0687

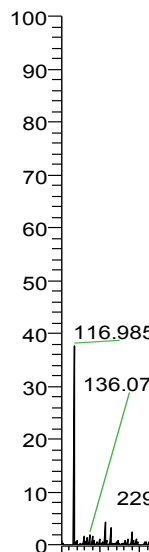

116.9859

136.0732

229.0835

353.2663

381.2976

479.0778

521.0559

668.1080

803.5430

883.1479

894.1389

1109.6798

1308.5763

1557.3133

1735.9942

1884.3503

m/z

NL:  
7.98E5

C<sub>19</sub>H<sub>20</sub>O<sub>8</sub>Na<sub>2</sub>P:  
C<sub>19</sub>H<sub>20</sub>O<sub>8</sub>Na<sub>2</sub>P<sub>1</sub>  
pa Chrg 1

NL:  
1.48E7

CAH\_6\_24\_orbi+  
ES#2-12 RT:  
0.01-0.09 AV: 11 T:  
FTMS + p ESI Full ms  
[100.00-2000.00]

**S127**

- 1 WO2012068284 (A2), 2012.
- 2 G. J. Kemperman, T. A. Roeters and P. W. Hilberink, *Eur. J. Org. Chem.*, 2003, **2003**, 1681–1686.
- 3 D. M. Gapinski, B. E. Mallett, L. L. Froelich and W. T. Jackson, *J. Med. Chem.*, 1990, **33**, 2807–2813.
- 4 R. A. Ross, N. Henry, S. N. Nabi, S. N. Nabi, N. K. Das, I. R. Beattie, P. A. Cocking, I. L. Finar, K. J. Saunders, A. Goldup, A. B. Morrison, G. W. Smith, A. R. Blake, K. N. Bascombe, M. Cowperthwaite, R. Shaw, C. B. Barlow, R. D. Guthrie, D. Murphy, V. Askam, D. Bailey, D. Jaques, J. D. Donaldson, J. D. O'Donogue, R. Oteng, J. Powell, B. L. Shaw, T. van Es, P. S. Bramwell, A. O. Fitton, E. E. Glover, G. H. Morris, E. N. Morgan, P. J. Palmer, L. Kruszynska, W. R. N. Williamson, J. A. McCleverty, A. Davison, G. Wilkinson, L. T. Allan, G. A. Swan, J. Lewis, F. Mabbs, H. D. Law, H. Goldwhite, R. A. Heacock and O. Hutzinger, *J. Chem. Soc. Resumed*, 1965, 3854–3904.
- 5 R. A. Bauer, T. A. Wenderski and D. S. Tan, *Nat. Chem. Biol.*, 2013, **9**, 21–29.
- 6 A. Mandal, S. Bhattacharya, S. R. Raychaudhuri and A. Chatterjee, *J. Chem. Res. Synop.*, 1988, 366–367.
- 7 V. B. Kammath, T. Šolomek, B. P. Ngoy, D. Heger, P. Klán, M. Rubina and R. S. Givens, *J. Org. Chem.*, 2013, **78**, 1718–1729.
- 8 P. E. Eaton, G. R. Carlson and J. T. Lee, *J. Org. Chem.*, 1973, **38**, 4071–4073.
- 9 J. Perkin, William H. and R. Robinson, *J. Chem. Soc. Trans.*, 1914, **105**, 2376–2392.
- 10 J. D. Williams, A. R. Khan, S. C. Cardinale, M. M. Butler, T. L. Bowlin and N. P. Peet, *Bioorg. Med. Chem.*, 2014, **22**, 419–434.
- 11 M. L. Pati, C. Abate, M. Contino, S. Ferorelli, R. Luisi, L. Carroccia, M. Niso and F. Berardi, *Eur. J. Med. Chem.*, 2015, **89**, 691–700.
- 12 N. Fujii, H. Irie and H. Yajima, *J. Chem. Soc. [Perkin 1]*, 1977, 2288–2289.
- 13 J. P. Day, B. Lindsay, T. Riddell, Z. Jiang, R. W. Allcock, A. Abraham, S. Sookup, F. Christian, J. Bogum, E. K. Martin, R. L. Rae, D. Anthony, G. M. Rosair, D. M. Houslay, E. Huston, G. S. Baillie, E. Klussmann, M. D. Houslay and D. R. Adams, *J. Med. Chem.*, 2011, **54**, 3331–3347.
- 14 A. Cohen, *J. Chem. Soc.*, 1935, 429–436.
- 15 C. K. Ingold and H. A. Piggott, *J. Chem. Soc. Trans.*, 1923, **123**, 1469–1509.
- 16 WO0168654 (A2), 2001.
- 17 A. Monks, D. Scudiero, P. Skehan, R. Shoemaker, K. Paull, D. Vistica, C. Hose, J. Langley, P. Cronise, A. Vaigro-Wolff, M. Gray-Goodrich, H. Campbell, J. Mayo and M. Boyd, *J. Natl. Cancer Inst.*, 1991, **83**, 757–766.
- 18 V. Vichai and K. Kirtikara, *Nat. Protoc.*, 2006, **1**, 1112–1116.
- 19 E. Hamel and C. M. Lin, *Biochim. Biophys. Acta BBA - Gen. Subj.*, 1981, **675**, 226–231.
- 20 E. Hamel, *Cell Biochem. Biophys.*, 2003, **38**, 1–21.
- 21 L. Liu, H. Beck, X. Wang, H.-P. Hsieh, R. P. Mason and X. Liu, *PloS One*, 2012, **7**, e43314.
- 22 R. P. Mason, D. Zhao, L. Liu, M. L. Trawick and K. G. Pinney, *Integr. Biol.*, 2011, **3**, 375–387.
